# Supplementary material for: A role for SUV39H1-mediated H3K9 trimethylation in the control of genome stability and senescence in WI38 human diploid lung fibroblasts
Source: Aging (Albany NY). 2014 Jul 21;6(7):545–63. doi: 10.18632/aging.100678 (PMC4153622; doi:10.18632/aging.100678)
Supplement: Supplementary file 1 [file aging-06-545-s001.xlsx]

## Sheet: P10-P15 GEx
SYMBOL	Fold	P10_0Gy.AVG_Signal	P15_0Gy.AVG_Signal	P15_0Gy.Diff Pval	ILMN_GENE	CHROMOSOME	ENTREZ_GENE_ID	UNIGENE_ID	SYNONYMS
MXRA5	-0.659469	329.268	208.463	4.12396e-07	MXRA5	X	25878		DKFZp564I1922
CTSK	-0.614438	371.233	242.484	0.00102778	CTSK	1	1513		CTSO2	CTSO	CTSO1	PKND	CTS02	PYCD	MGC23107
COX7A1	-0.485998	397.985	284.162	3.14683e-06	COX7A1	19	1346		COX7AH	COX7A	COX7AM
HIRIP3	-0.477638	452.648	325.07	0.00858444	HIRIP3	16	8479
TMEM119	-0.475789	306.895	220.68	0.00175968	TMEM119	12	338773
FAM129A	-0.459435	582.58	423.693	3.66583e-07	FAM129A	1	116496		NIBAN	FLJ38228	C1orf24
NDN	-0.447869	335.437	245.917	0.000138031	NDN	15	4692		HsT16328
TMSB15A	-0.434817	1453.83	1075.53	0.0231542	TMSB15A	X	11013		Tb15	TMSNB	TbNB
DDX6	-0.420586	272.6	203.665	0.0210046	DDX6	11	1656		P54	HLR2	FLJ36338	RCK
PCF11	-0.418307	307.449	230.065	0.00117298	PCF11	11	51585		KIAA0824
DTX2	-0.378037	481.628	370.605	0.022034	DTX2	7	113878		MGC71098	KIAA1528	RNF58
SOCS1	-0.376319	389.073	299.742	0.00183521	SOCS1	16	8651		SSI-1	CISH1	SSI1	CIS1	JAB	TIP3	SOCS-1
SF3A3	-0.376196	1640.98	1264.32	2.95378e-05	SF3A3	1	10946		SAP61	PRPF9	SF3a60	PRP9
SALL2	-0.373536	337.063	260.175	0.0388105	SALL2	14	6297		FLJ10414	KIAA0360	HSAL2	ZNF795	p150(Sal2)
PHGDH	-0.372315	2283.48	1764.09	2.62614e-05	PHGDH	1	26227		PGD	3-PGDH	PGDH	PDG	SERA	PGAD	MGC3017	3PGDH
TOR3A	-0.370139	279.012	215.874	0.024712	TOR3A	1	64222		FLJ22345	ADIR	MGC111104	ADIR2
ZMYND19	-0.348886	506.521	397.715	0.00135107	ZMYND19	9	116225		MIZIP	RP11-48C7.4
CDCA7	-0.343857	611.839	482.087	0.00200383	CDCA7	2	83879		MGC34109	JPO1	FLJ14736	FLJ14722
GPC6	-0.341798	377.243	297.666	0.0210391	GPC6	13	10082		MGC126288
CDT1	-0.335649	405.537	321.359	0.0488415	CDT1	16	81620		DUP	RIS2
NOTCH1	-0.334949	437.988	347.242	0.0452783	NOTCH1	9	4851		TAN1	hN1
NR2C2AP	-0.332737	334.633	265.708	0.0272196	NR2C2AP	19	126382		TRA16
TRIB3	-0.332396	455.144	361.483	0.00688492	TRIB3	20	57761		TRB3	C20orf97	SKIP3	NIPK	SINK
CCDC93	-0.32574	457.792	365.267	0.00317899	CCDC93	2	54520		FLJ10996	FLJ25197	MGC13033
KIF4A	-0.324268	398.691	318.436	0.00688492	KIF4A	X	24137		HSA271784	KIF4	FLJ12655	FLJ12530	KIF4-G1	FLJ20631	FLJ14204
GAS2L3	-0.322979	292.654	233.953	0.0350762	GAS2L3	12	283431
EXOSC2	-0.320862	553.284	442.955	0.0118448	EXOSC2	9	23404		p7	RRP4	hRrp4p	Rrp4p
C2orf44	-0.319221	541.503	434.016	0.0231542	C2ORF44	2	80304		FLJ21945	PP384
KIF20A	-0.31661	1624.46	1304.37	0.0225515	KIF20A	5	10112		RAB6KIFL	MKLP2	FLJ21151
HSPA1B	-0.314712	1522.32	1223.96	0.0395081	HSPA1B	6	3304		HSP70-2	HSPA1A
TMEM216	-0.31436	363.48	292.313	0.0331894	TMEM216	11	51259
COMMD4	-0.306214	2205.43	1783.67	0.0350762	COMMD4	15	54939		FLJ20452
CDCA5	-0.305662	1775.59	1436.58	0.0365595	CDCA5	11	113130		MGC16386
C10orf6	-0.302686	540.378	438.107	0.00419939	C10ORF6	10	55719
FAM46C	-0.300949	1065.04	864.511	0.00668955	FAM46C	1	54855		FLJ20202
POLA1	-0.298661	338.579	275.267	0.0358869	POLA1	X	5422		DKFZp686K1672	POLA
C9orf140	-0.290549	301.858	246.796	0.0361316	C9ORF140	9	89958
C2orf49	-0.288913	357.169	292.349	0.0387373	C2ORF49	2	79074		FLJ45759	MGC5509
ARHGEF2	-0.282751	2348.06	1930.15	0.000873016	ARHGEF2	1	9181		P40	GEF	LFP40	DKFZp547L106	GEF-H1	DKFZp547P1516	GEFH1	KIAA0651
POLQ	-0.281818	407.324	335.046	0.0293337	POLQ	3	10721		DKFZp781A0112	PRO0327	POLH
POTEF	-0.277655	22626.8	18665.5	0.00257062	POTEF	2	728378		POTEACTIN
MAMLD1	-0.277207	424.401	350.21	0.0294853	MAMLD1	X	10046		CXorf6	F18	CG1
TWIST1	-0.274853	594.967	491.761	0.0340388	TWIST1	7	7291		TWIST	ACS3	BPES2	SCS	BPES3
CDKN2AIP	-0.27357	438.65	362.882	0.0340684	CDKN2AIP	4	55602		FLJ20036	CARF
FOXRED2	-0.272889	238.41	197.322	0.0435915	FOXRED2	22	80020		FLJ33734	FLJ23322
PPIAL4A	-0.270632	23781	19713.4	0.00121914	PPIAL4A	1	164022		MGC163248	MGC163250	COAS2
GPSM2	-0.263438	483.73	402.995	0.0311591	GPSM2	1	29899		Pins	LGN
TNFAIP8L1	-0.259938	537.645	449	0.0398056	TNFAIP8L1	19	126282		MGC17791
MCM6	-0.256254	1830.68	1532.76	0.00737456	MCM6	2	4175		Mis5	P105MCM	MCG40308
DLGAP5	-0.24983	1280.27	1076.7	0.0165073	DLGAP5	14	9787		DLG1	HURP	KIAA0008
FANCG	-0.246831	552.572	465.677	0.0458731	FANCG	9	2189		XRCC9	FAG
LGTN	-0.243933	578.44	488.458	0.0388105	LGTN	1	1939		HCA56
PLK4	-0.242879	635.239	536.813	0.0335301	PLK4	4	10733		SAK	STK18
ARID4B	-0.241918	591.548	500.226	0.037736	ARID4B	1	51742		BCAA	RBP1L1	MGC163290	BRCAA1	SAP180	RBBP1L1	DKFZp313M2420
E4F1	-0.239802	719.824	609.591	0.046753	E4F1	16	1877		MGC99614	E4F
GCN1L1	-0.229844	1801.15	1535.89	0.0178813	GCN1L1	12	10985		GCN1	GCN1L	KIAA0219
FSCN1	-0.228547	13889.4	11854.5	0.0128662	FSCN1	7	6624		FLJ38511	SNL	p55
RPS10	-0.223843	20098.3	17209.8	0.016457	RPS10	6	6204		MGC88819
RPL27A	-0.219237	22800.7	19586.3	0.0278716	RPL27A	11	6157		MGC87238
TMEM97	-0.213577	1095.64	944.879	0.0491464	TMEM97	17	27346		MAC30
FTHL7	-0.210765	18881.4	16315	0.0457475	FTHL7	13	2500
CYB5R3	0.0377664	7905.35	8115.03	0.00409445	CYB5R3	22	1727		DIA1	B5R
EI24	0.0879493	1827.87	1942.77	0.010026	EI24	11	9538		TP53I8	PIG8
HPRT1	0.121563	1355.35	1474.5	0.0197849	HPRT1	X	3251		HPRT	HGPRT
CHPT1	0.15674	981.951	1094.64	0.0336345	CHPT1	12	56994		CPT1	CPT
CD44	0.172104	5860.75	6603.31	0.00131795	CD44	11	960		LHR	CDW44	ECMR-III	MGC10468	MDU2	CSPG8	Pgp1	IN	MUTCH-I	MIC4		MC56	HCELL
DHDDS	0.204015	372.8	429.428	0.047744	DHDDS	1	79947		HDS	DS	CIT	CPT	FLJ13102
NDUFAB1	0.208043	5418.46	6258.98	0.0273565	NDUFAB1	16	4706		FASN2A	ACP	SDAP	MGC65095
CTNNAL1	0.20862	1589.12	1836.36	0.0284581	CTNNAL1	9	8727		CLLP	alpha-CATU
SSU72	0.213468	3051.87	3538.56	0.0231542	SSU72	1	29101		PNAS-120	HSPC182	FLJ13048
EEF1G	0.213556	6100.91	7074.26	0.0210391	EEF1G	11	1937		EF1G	GIG35
GLRX3	0.215057	2109.24	2448.3	0.0236324	GLRX3	10	10539		GRX4	TXNL3	bA500G10.4	GLRX4	FLJ11864	GRX3	TXNL2	PICOT
SNX3	0.215329	5949.01	6906.61	0.0194046	SNX3	6	8724		SDP3	SNX3A	MGC17570	Grd19
BAT2D1	0.216247	1030.63	1197.29	0.0338314	BAT2D1	1	23215		BAT2-iso	XTP2
CAMK2N1	0.216704	5916.41	6875.32	0.0180685	CAMK2N1	1	55450		ICAP-1alpha	MGC22256	PRO1489	RP11-401M16.1
SERPINE2	0.219749	4100	4774.57	0.0161217	SERPINE2	2	5270		PI7	GDN	PNI	PN1
NIP7	0.220567	1327.15	1546.38	0.0371764	NIP7	16	51388		HSPC031	FLJ10296	CGI-37	KD93
C12orf24	0.222209	1018.27	1187.83	0.0259059	C12ORF24	12	29902		HSU79274
DNAJA2	0.222289	1734.37	2023.29	0.0317449	DNAJA2	16	10294		RDJ2	DNAJ	DJA2	DNJ3	HIRIP4	PRO3015	CPR3
FAM98A	0.223882	2952.37	3447.99	0.0231542	FAM98A	2	25940		DKFZp686O03192	DKFZP564F0522
SSR4	0.224184	3140.45	3668.41	0.0132276	SSR4	X	6748		TRAPD
ANXA2P1	0.227569	14517.4	16997.8	0.00905793	ANXA2P1	4	303		LPC2A	ANX2L1	ANX2P1
SLMAP	0.228747	659.651	772.99	0.0338839	SLMAP	3	7871		MGC138761	MGC138760	FLJ42206	SLAP	KIAA1601
TNFRSF10D	0.22933	642.128	752.76	0.0388105	TNFRSF10D	8	8793		CD264	TRUNDD	TRAILR4	DCR2
SYAP1	0.232181	976.968	1147.56	0.0468659	SYAP1	X	94056		FLJ14495	DKFZp686K221	PRO3113	FLJ44185
MGC71993	0.234578	2235.31	2629.98	0.0123902	MGC71993		440400
SH3BGRL3	0.234907	4488.4	5282.08	0.00668955	SH3BGRL3	1	83442		TIP-B1	SH3BP-1
GSTO1	0.235207	7382.36	8689.6	0.0364027	GSTO1	10	9446		GSTTLp28	P28	DKFZp686H13163
RNASEH1	0.2355	1239.01	1458.7	0.0112888	RNASEH1	2	246243		H1RNA
MYOF	0.235933	3654.5	4303.79	0.00740416	MYOF	10	26509
ATP6V1G1	0.238524	2826.99	3335.24	0.00605622	ATP6V1G1	9	9550		Vma10	ATP6J	ATP6GL	ATP6G1	DKFZp547P234	ATP6G
C12orf44	0.23982	863.894	1020.13	0.0137085	C12ORF44	12	60673		FLJ11773
SDF2	0.240161	1400.14	1653.74	0.0189466	SDF2	17	6388
MAN2B2	0.241074	1852.55	2189.48	0.00622556	MAN2B2	4	23324		KIAA0935
GOLIM4	0.241462	463.954	548.481	0.0418581	GOLIM4	3	27333		P138	GIMPC	GOLPH4	GPP130
C2orf25	0.246646	3363.76	3990.92	0.0149184	C2ORF25	2	27249		CL25022
SHISA5	0.248262	2827.21	3358.09	0.00363184	SHISA5	3	51246
NDUFV2	0.248656	3972.01	4719.15	0.00653066	NDUFV2	18	4729
FCGRT	0.24884	525.918	624.923	0.0231542	FCGRT	19	2217		alpha-chain	FCRN
GUK1	0.249493	3097.9	3682.75	0.00299028	GUK1	1	2987		GMK
HDDC2	0.249807	3352.96	3986.83	0.00289465	HDDC2	6	51020		NS5ATP2	dJ167O5.2	C6orf74	CGI-130	MGC87330
NMD3	0.252461	735.705	876.399	0.016833	NMD3	3	51068		CGI-07	FLJ21053
WRB	0.252539	771.704	919.332	0.0233176	WRB	21	7485		CHD5
PGAM1	0.254835	2997.97	3577.17	0.0172994	PGAM1	10	5223		PGAMA
CSPG4	0.255467	1253.71	1496.58	0.00355227	CSPG4	15	1464		MSK16	MCSP	NG2	MCSPG	MEL-CSPG	HMW-MAA
RPL13A	0.257538	5896.27	7048.62	0.00409094	RPL13A	19	23521
ACTR10	0.258233	1534.09	1834.79	0.00257062	ACTR10	14	55860		HARP11	ACTR11
CD97	0.258233	886.572	1060.35	0.0341222	CD97	19	976		TM7LN1
SPATS2	0.25964	939.899	1125.23	0.000988901	SPATS2	12	65244		SCR59	FLJ13117	Nbla00526	SPATA10
VPS4A	0.261276	498.314	597.249	0.0189466	VPS4A	16	27183		VPS4	VPS4-1	SKD2	SKD1	FLJ22197
HEBP1	0.261375	2172.54	2604.05	0.00225827	HEBP1	12	50865		HBP	HEBP
ZMAT3	0.26164	7494.85	8985.14	0.0016517	ZMAT3	3	64393		PAG608	WIG1	FLJ12296	WIG-1	MGC10613
KIAA1539	0.263443	595.751	715.104	0.00828148	KIAA1539	9	80256		P1.11659_5	FLJ11560	RP11-182N22.6	bA182N22.6
SCO1	0.267104	1246.19	1499.65	0.0018581	SCO1	17	6341		SCOD1
PLA2G15	0.267908	415.727	500.561	0.0209716	PLA2G15	16	23659		DKFZp564A0122	ACS	LPLA2	LLPL
MRGPRF	0.268342	626.51	754.583	0.00594774	MRGPRF	11	219928		MGC21621	GPR140	mrgF	GPR168	RTA
TMEM66	0.26847	3146.64	3790.22	0.0413743	TMEM66	8	51669		FLJ22274	FOAP-7	MGC8721	HSPC035	XTP3
STC2	0.268825	2517.98	3033.73	0.00376721	STC2	5	8614		STCRP	STC-2
POLR2L	0.269005	827.722	997.385	0.0358869	POLR2L	11	5441		hsRPB10b	RPABC5	RBP10	RPB10beta	RPB7.6	RPB10	hRPB7.6
PPP2R1A	0.269859	4108.63	4953.74	0.00594774	PPP2R1A	19	5518		PR65A	MGC786
CSNK1D	0.270661	1290.81	1557.18	0.0242614	CSNK1D	17	1453		HCKID
ACAA1	0.270887	404.528	488.083	0.0202922	ACAA1	3	30		THIO	ACAA	PTHIO
RNF40	0.27095	510.633	616.131	0.0233065	RNF40	16	9810		KIAA0661	DKFZp686K191	STARING	BRE1B	RBP95	MGC13051
RTCD1	0.271887	1095.84	1323.1	0.0474354	RTCD1	1	8634		RPC
TAF7	0.272278	701.066	846.687	0.0218194	TAF7	5	6879		TAFII55	TAF2F
TUBB2A	0.272289	2380.11	2874.51	0.000851434	TUBB2A	6	7280		TUBB	TUBB2	dJ40E16.7
SMS	0.273301	4669.01	5642.82	0.00216076	SMS	X	6611		SpS	SPMSY	MRSR	SRS
NPLOC4	0.273693	514.61	622.111	0.012512	NPLOC4	17	55666		FLJ20657	FLJ23742	NPL4	KIAA1499
C10orf32	0.275585	423.053	512.1	0.0272295	C10ORF32	10	119032		RP11-753C18.6	DKFZp686B2219	MGC27171	CYT19	AS3MT	FLJ40752
OSTF1	0.276009	1283.84	1554.53	0.0159463	OSTF1	9	26578		bA235O14.1	OSF	SH3P2	FLJ20559
METTL5	0.278262	1401.75	1699.94	0.00594774	METTL5	2	29081		HSPC133	FLJ10459
NBL1	0.278286	954.971	1158.14	0.0107101	NBL1	1	4681		D1S1733E	NO3	DAND1	DAN	NB	MGC8972
SUPT5H	0.279149	655.414	795.331	0.0155921	SUPT5H	19	6829		SPT5H	SPT5	FLJ34157
PHPT1	0.280358	2533.88	3077.39	0.00594774	PHPT1	9	29085		bA216L13.10	CGI-202	PHP14	HSPC141	RP11-216L13.10	DKFZp564M173
HLA-E	0.281212	1749.02	2125.43	0.00257062	HLA-E	6	3133		DKFZp686P19218	EA2.1	MHC	HLA-6.2	EA1.2
LOXL1	0.282228	551.805	671.035	0.0206147	LOXL1	15	4016		LOXL	LOL
DKK1	0.282809	1123.02	1366.22	0.00956764	DKK1	10	22943		DKK-1	SK
MXD4	0.28815	974.332	1189.73	0.0150348	MXD4	4	10608		MSTP149	MAD4	MST149
TIGA1	0.291928	749.085	917.086	0.0338314	TIGA1	5	114915		MGC126893
FOXF1	0.295998	966.871	1187.06	0.000439385	FOXF1	16	2294		MGC105125	FKHL5	FREAC1
C10orf88	0.296594	305.737	375.519	0.0225515	C10ORF88		80007		FLJ13490
SLC25A43	0.298	913.215	1122.74	0.0248197	SLC25A43	X	203427
PQLC3	0.301846	698.648	861.237	0.0341671	PQLC3	2	130814		C2orf22	MGC33602
C19orf22	0.304162	1321	1631.04	0.0244857	C19ORF22	19	91300		MGC16353
MOBKL1B	0.304218	574.919	709.881	0.0242541	MOBKL1B	2	55233		Mob4B	MOB1	MATS1	C2orf6	FLJ10788	MOBK1B	FLJ11595
FOXC1	0.304665	685.562	846.759	0.0285405	FOXC1	6	2296		FREAC3	FKHL7	IHG1	ARA	IRID1	IGDA
BLCAP	0.305962	568.378	702.654	0.00160445	BLCAP	20	10904		BC10
KLF2	0.307567	2263.77	2801.68	0.0237183	KLF2	19	10365		LKLF
ARF3	0.307884	765.404	947.486	0.0358869	ARF3	12	377
SAT1	0.307983	1179.81	1460.57	0.00319338	SAT1	X	6303		KFSD	SSAT-1	DC21	SSAT	SAT
PTS	0.308125	2382.49	2949.75	0.000604412	PTS	11	5805		PTPS
MAP1A	0.308805	1214.4	1504.26	0.000358066	MAP1A	15	4130		MTAP1A	MAP1L
TSPAN31	0.309735	394.958	489.542	0.0128173	TSPAN31	12	6302		SAS
FAM18B	0.310577	868.938	1077.66	0.0301976	FAM18B	17	51030		NPD008	YDR084C	FLJ46240	CGI-148
ATP6V1H	0.314882	568.345	706.971	0.018352	ATP6V1H	8	51606		SFDbeta	CGI-11	VMA13	SFDalpha	SFD	MSTP042
SRP14P1	0.314914	4655.06	5790.61	0.00289925	SRP14P1	12	390284
KCTD20	0.317004	1345.52	1676.17	0.00813258	KCTD20	6	222658		MGC14254	dJ108K11.3	C6orf69
DHRS7	0.318373	2331.83	2907.61	0.0229003	DHRS7	14	51635		CGI-86	retDSR4	retSDR4
C9orf167	0.318566	609.993	760.716	0.00594774	C9ORF167	9	54863		FLJ20245	RP13-122B23.4
TM9SF2	0.319395	1549.83	1933.89	3.35009e-05	TM9SF2	13	9375		P76	MGC117391	FLJ26287
NDUFC1	0.320215	877.672	1095.79	9.57076e-05	NDUFC1	4	4717		MGC138266	KFYI	MGC126847	MGC117464
EIF3M	0.320313	2128.86	2658.1	0.000523388	EIF3M	11	10480		FLJ29030	GA17	hfl-B5	eIF3m	PCID1	B5
HLA-A	0.321231	5264.32	6577.22	0.0338839	HLA-A	6	3105
LY6E	0.322389	1815.03	2269.51	2.25882e-05	LY6E	8	4061		TSA-1	RIGE	RIG-E	SCA2	SCA-2
HIST1H2BK	0.324586	1757.64	2201.1	0.000231841	HIST1H2BK	6	85236		MGC131989	H2BFT	H2BFAiii	H2B/S
FVT1	0.329781	951.78	1196.22	0.0139749	FVT1	18	2531
NEO1	0.330766	1234.16	1552.18	0.0100254	NEO1	15	4756		NGN	HsT17534
NT5C3	0.333875	661.784	834.109	0.041945	NT5C3	7	51251		MGC27337	UMPH1	MGC87828	UMPH	MGC87109	PN-I	PSN1	cN-III	P5'N-1
DSTN	0.334595	4172.22	5261.27	0.0218334	DSTN	20	11034		ACTDP	bA462D18.2	ADF
CPA4	0.334945	1363.08	1719.3	3.35009e-05	CPA4	7	51200		CPA3
AGRN	0.335592	857.834	1082.5	0.00191814	AGRN	1	375790		FLJ45064
DNTTIP1	0.336711	591.249	746.673	0.000111908	DNTTIP1	20	116092		C20orf167	Tdif1	dJ447F3.4
C14orf4	0.342525	1331.77	1688.65	9.09411e-06	C14ORF4	14	64207		IRF2BPL	KIAA1865	EAP1
NAP1L5	0.343767	558.368	708.606	9.35902e-05	NAP1L5	4	266812		DRLM
SURF4	0.347288	2907.09	3698.31	3.57961e-06	SURF4	9	6836		FLJ22993	ERV29	MGC102753
BRI3	0.348045	2945.2	3748.76	0.000833994	BRI3	7	25798		I3
SFXN1	0.353225	395.727	505.507	0.000368133	SFXN1	5	94081		FLJ12876
TSPAN3	0.355114	1737.76	2222.75	0.0234338	TSPAN3	15	10099		TM4-A	TSPAN-3	TM4SF8
PSG7	0.361938	442.139	568.215	9.81647e-05	PSG7	19	5676
BRP44	0.362678	1966.51	2528.56	6.35331e-07	BRP44	1	25874		MGC125752	DKFZP564B167	MGC125753
CAMK1	0.363092	425.043	546.681	0.000251673	CAMK1	3	8536		MGC120318	CAMKI	MGC120317
PTPRK	0.363095	909.688	1170.03	3.14683e-06	PTPRK	6	5796		DKFZp779N1045	DKFZp686C2268	R-PTP-kappa
MLLT11	0.363446	3212.41	4132.75	2.25882e-05	MLLT11	1	10962		AF1Q	RP11-316M1.10
PPP1R7	0.364336	837.564	1078.19	7.21324e-06	PPP1R7	2	5510		SDS22
PRNP	0.364342	2406.62	3098.03	0.0422266	PRNP	20	5621		CD230	PrP33-35C	ASCR	PrP27-30	GSS	CJD	PRIP	PrPc	PrP	MGC26679
CUTC	0.365245	328.915	423.676	0.00116957	CUTC	10	51076		RP11-483F11.3	CGI-32
LAPTM4A	0.370348	1036.87	1340.32	0.0015269	LAPTM4A	2	9741		LAPTM4	KIAA0108	Mtrp	HUMORF13	MBNT
FLJ40504	0.37073	496.578	642.078	0.000352364	FLJ40504	17	284085		MGC138233	MGC138231
CAMSAP1L1	0.371671	510.83	660.938	0.0256232	CAMSAP1L1	1	23271		KIAA1078	MGC150681	MGC150680	RP11-93N17.1
EXOSC4	0.372255	412.784	534.297	0.00267392	EXOSC4	8	54512		Rrp41p	p12A	FLJ20591	hRrp41p	Ski6p	RRP41A	SKI6	RRP41
MBOAT7	0.372336	1076.08	1392.93	7.98636e-07	MBOAT7	19	79143		hMBOA-7	LPIAT	BB1	LENG4
HSPB3	0.37315	235.226	304.659	0.0118165	HSPB3	5	8988		HSPL27
DEDD2	0.374161	540.594	700.657	0.000504556	DEDD2	19	162989		FLAME-3
TRIM55	0.37519	350.739	454.913	0.00238014	TRIM55	8	84675		MURF-2	RNF29
RBM34	0.37773	839.65	1090.95	7.3835e-05	RBM34	1	23029		KIAA0117
SERPINB2	0.379083	1564.51	2034.66	0.000497886	SERPINB2	18	5055		PAI	HsT1201	PLANH2	PAI-2	PAI2
MRPL12	0.382207	1116.12	1454.68	5.01654e-06	MRPL12	17	6182		MRP-L31/34	L12mt	5c5-2	MRPL7/L12	MRPL7	MGC8610	RPML12
GABARAPL2	0.384117	2346.96	3062.93	0.000273259	GABARAPL2	16	11345		GEF2	GATE16	GATE-16	GEF-2	ATG8
RABAC1	0.389247	1638.89	2146.47	0.00181853	RABAC1	19	10567		PRAF1	PRA1	YIP3
DDX21	0.390157	1355.11	1775.92	0.0225515	DDX21	10	9188		RH-II/GU	GUA	GURDB	RH-II/GuA	DKFZp686F21172
YPEL5	0.393712	1327.26	1743.71	0.00194964	YPEL5	2	51646		CGI-127
SERINC2	0.395451	745.951	981.189	4.12396e-07	SERINC2	1	347735		TDE2	PRO0899	MGC90340	FKSG84	TDE2L
BNIP3	0.399767	2746.69	3623.7	0.0388105	BNIP3	10	664		NIP3
CYB5R1	0.404138	950.695	1258.05	0.000434904	CYB5R1	1	51706		B5R.1	NQO3A2	humb5R2
C18orf32	0.404999	387.557	513.159	0.00828148	C18ORF32	18	497661		FLJ23458
GABBR2	0.409017	1153.13	1531.11	2.58697e-08	GABBR2	9	9568		HRIHFB2099	HG20	GPR51	FLJ36928	GPRC3B	GABABR2
RAB21	0.411647	599.935	798.036	3.753e-07	RAB21	12	23011		KIAA0118
SRGN	0.41337	2981.33	3970.51	2.48193e-05	SRGN	10	5552		PRG1	PPG	PRG	FLJ12930	MGC9289
PPP1R3C	0.416156	937.479	1250.94	0.00382688	PPP1R3C	10	5507		PPP1R5
CTSZ	0.41662	303.907	405.654	6.99523e-05	CTSZ	20	1522		CTSX
TUSC3	0.425458	973.033	1306.78	0.00162352	TUSC3	8	7991		D8S1992	N33	OST3A	MGC13453
BCL2L1	0.429419	1939.28	2611.61	8.18762e-05	BCL2L1	20	598		DKFZp781P2092	BCL-XL/S	bcl-xL	BCLX	Bcl-X	bcl-xS	BCL2L
LYN	0.436647	443.509	600.269	1.37661e-06	LYN	8	4067		FLJ26625	JTK8
C14orf100	0.442863	1051.06	1428.7	1.55368e-09	C14ORF100	14	51528		HSPC213	HSPC327
PLAT	0.446567	901.087	1227.99	3.66583e-07	PLAT	8	5327		T-PA	DKFZp686I03148	TPA
LRRN3	0.452617	1673.76	2290.57	0.000452684	LRRN3	7	54674		NLRR-3	NLRR3	FLJ11129	FIGLER5
FTHL12	0.459125	9012.32	12389.3	3.77313e-07	FTHL12	9	2504
BIRC2	0.459556	1752.47	2409.86	0.00458227	BIRC2	11	329		API1	Hiap-2	MIHB	RNF48	HIAP2	cIAP1
PTPLA	0.4596	1896.29	2607.7	5.25531e-06	PTPLA	10	9200		CAP
CLPTM1L	0.460265	1496.8	2059.29	4.59595e-08	CLPTM1L	5	81037		DKFZp666M1010	FLJ14400	CRR9	DKFZP761M2324
VEGFC	0.467627	2176.62	3009.9	0.000173144	VEGFC	4	7424		VRP	Flt4-L
INPP5A	0.484401	1037.05	1450.83	2.60849e-11	INPP5A		3632
TXNL1	0.489648	739.07	1037.73	0.00109593	TXNL1	18	9352		TXNL	TRP32	Txl	TXL-1
BDKRB1	0.490477	735.318	1033.06	1.33685e-10	BDKRB1	14	623		BKR1	B1BKR	BKB1R	B1R	BRADYB1
LPXN	0.493054	3410.12	4799.47	0.00160445	LPXN	11	9404		LDPL
ENG	0.54926	1122.34	1642.36	7.3835e-05	ENG	9	2022		ORW	CD105	HHT1	END	FLJ41744	ORW1
IL1RAPL1	0.560823	383.094	565.106	7.82021e-05	IL1RAPL1	X	11141		MRX34	IL1RAPL	OPHN4	MRX21	TIGIRR-2	IL1R8
ID2	0.60277	918.582	1394.98	0.00218549	ID2	2	3398		GIG8	MGC26389	ID2A	ID2H
HIST1H2AC	0.663523	423.59	670.943	0.0391017	HIST1H2AC	6	8334		dJ221C16.4	H2AFL	H2A/l	MGC99519
SEMA6A	0.728863	436.074	722.72	1.92167e-05	SEMA6A	5	57556		VIA	SEMAQ	SEMA	SEMA6A1	KIAA1368	HT018	sema VIa
APP	0.845135	535.304	961.637	9.23717e-05	APP	21	351		AD1	ABETA	CTFgamma	APPI	ABPP	CVAP	PN2	AAA

## Sheet: P10-P15 ME
SYMBOL	FOLD	P10_0Gy.AVG_Beta	P15_0Gy.AVG_Beta	P15_0Gy.DiffScore	NAME	ACCESSION	GENE_ID	CHR	MAPINFO	TSS_COORDINATE	DISTANCE_TO_TSS	CPG_ISLAND	CPG_ISLAND_LOCATIONS	MIR_CPG_ISLAND	MIR_NAMES	SYNONYM
TMEM53	-2.46029	0.102772	0.0186747	-20.6806	cg02890926	NM_024587.2	GeneID:79639	1	44912942	44912686	256	TRUE	1:44912008-44913252			FLJ22353	RP4-678E16.2
SMYD4	-2.15606	0.337463	0.0757162	-117.229	cg04005701	NM_052928.1	GeneID:114826	17	1680391	1679844	547	TRUE	17:1679534-1680496			ZMYND21	KIAA1936
ADPN	-2.02498	0.362741	0.0891284	-118.773	cg23653187	NM_025225.2	GeneID:80339	22	42650590	42650952	362	TRUE	22:42650559-42652185			PNPLA3	C22orf20	iPLA(2)epsilon
SLC24A4	-1.95766	0.218302	0.0562011	-51.4768	cg15052901	NM_153646.2	GeneID:123041	14	91858355	91858678	323	FALSE			cg15052901	NCKX4	SLC24A2	FLJ38852
XBP1	-1.87469	0.106134	0.0289413	-15.143	cg14013300	NM_005080.2	GeneID:7494	22	27526047	27526560	513	TRUE	22:27525822-27526947			XBP2	TREB5
CYBRD1	-1.77887	0.174114	0.050739	-30.4994	cg10731149	NM_024843.2	GeneID:79901	2	172086932	172087229	297	TRUE	2:172086881-172088589			DCYTB	FRRS3	FLJ23462
R3HDM1	-1.75687	0.210685	0.0623393	-41.6794	cg20119051	NM_015361.2	GeneID:23518	2	136005195	136005553	358	TRUE	2:136003486-136006366			R3HDM	KIAA0029
JMJD2D	-1.72607	0.128213	0.0387553	-18.4896	cg24146183	NM_018039.2	GeneID:55693	11	94346603	94346493	110	TRUE	11:94345788-94346832			FLJ10251
CAP1	-1.71029	0.165923	0.0507058	-27.7083	cg27072323	NM_006367.2	GeneID:10487	1	40279445	40279015	430	TRUE	1:40277835-40279723			CAP	CAP1-PEN
LOC283932	-1.59166	0.303171	0.100589	-61.1267	cg03627896	NM_175901.3	GeneID:283932	16	30841835	30842091	256	TRUE	16:30840504-30842816			MGC125469
MRPS21	-1.56591	0.321535	0.108603	-65.3872	cg05191071	NM_018997.1	GeneID:54460	1	148532714	148532893	179	TRUE	1:148532637-148533320			MDS016	RPMS21	MRP-S21
HTR6	-1.46653	0.132578	0.0479736	-14.8991	cg10741760	NM_000871.1	GeneID:3362	1	19864611	19864367	244	TRUE	1:19863719-19865436			5-HT6
GRIN2C	-1.45808	0.122512	0.0445913	-13.0997	cg09722397	NM_000835.3	GeneID:2905	17	70367538	70367602	64	TRUE	17:70367092-70369736			NR2C	NMDAR2C
DKFZP586D0919	-1.44196	0.243776	0.0897259	-36.8975	cg08881519	NM_015433.2	GeneID:25895	12	56451812	56452650	838	TRUE	12:56451721-56452312
PHKA2	-1.40407	0.177581	0.0671009	-22.1052	cg07314984	NM_000292.1	GeneID:5256	X	18913164	18912097	1067	TRUE	X:18911769-18913306			PHK	PYK	XLG	PYKL	XLG2
CPNE4	-1.385	0.248253	0.0950537	-35.2283	cg09147222	NM_130808.1	GeneID:131034	3	133236252	133236534	282	TRUE	3:133236061-133236984			CPN4	COPN4	MGC15604
TTLL1	-1.37146	0.250706	0.0968981	-35.2283	cg09047884	NM_012263.3	GeneID:25809	22	41814928	41815373	445	TRUE	22:41814921-41816049			C22orf7	HS323M22B
LAMC1	-1.34442	0.149749	0.0589727	-15.5096	cg10847798	NM_002293.2	GeneID:3915	1	181260075	181259176	899	TRUE	1:181258319-181260177			LAMB2	MGC87297
AAMP	-1.29265	0.172397	0.0703724	-18.0965	cg25559243	NM_001087.2	GeneID:14	2	218844046	218843137	909	TRUE	2:218843972-218844206
TSP50	-1.27452	0.220733	0.0912426	-26.0758	cg19668234	NM_013270.2	GeneID:29122	3	46734453	46734368	85	TRUE	3:46733944-46734676
GTF2I	-1.27401	0.174101	0.0719926	-17.8514	cg11334469	NM_032999.1	GeneID:2969	7	73709080	73709966	886	TRUE	7:73708762-73709168			DIWS	SPIN	IB291	BAP135	BTKAP1	TFII-I	WBSCR6	BAP-135
TCF21	-1.26231	0.155884	0.0649843	-14.7211	cg24215443	NM_003206.2	GeneID:6943	6	134252291	134251970	321	TRUE	6:134252144-134253150			POD1
C11orf1	-1.25711	0.494412	0.206853	-99.036	cg04545708	NM_022761.1	GeneID:64776	11	111255565	111255475	90	FALSE			cg04545708	FLJ23499
PTRH2	-1.20442	0.233696	0.101411	-25.4733	cg08793459	NM_016077.3	GeneID:51651	17	55139429	55139638	209	TRUE	17:55138776-55140351			BIT1	PTH2	CGI-147	FLJ32471
USP29	-1.19565	0.27544	0.120254	-30.8855	cg16547341	NM_020903.2	GeneID:57663	19	62322503	62323321	818	TRUE	19:62321956-62323350			HOM-TES-84/86
CHCHD3	-1.19546	0.156445	0.068311	-13.4212	cg07590705	NM_017812.1	GeneID:54927	7	132417050	132417373	323	TRUE	7:132416994-132417769			FLJ20420
CA2	-1.19516	0.177342	0.0774519	-16.2304	cg19876444	NM_000067.1	GeneID:760	8	86563949	86563498	451	TRUE	8:86562612-86564342			CA II	CA-II
APC	-1.18628	0.258406	0.113553	-28.2813	cg01240931	NM_000038.3	GeneID:324	5	112101942	112101483	459	FALSE			cg01240931	GS	DP2	DP3	FAP	FPC	DP2.5
DGKD	-1.16524	0.170828	0.076171	-14.5934	cg25506396	NM_003648.2	GeneID:8527	2	233927606	233927892	286	TRUE	2:233927127-233929126			dgkd-2	DGKdelta	KIAA0145
ZNF7	-1.16103	0.219842	0.0983116	-21.4428	cg20845050	NM_003416.1	GeneID:7553	8	146024470	146023807	663	FALSE			cg20845050	KOX4	zf30	HF.16	FLJ38706
HDAC6	-1.13389	0.49614	0.226083	-81.5379	cg10783042	NM_006044.2	GeneID:10013	X	48545757	48545431	326	TRUE	X:48544530-48545980			HD6	JM21
MAP3K7	-1.08732	0.175834	0.0827537	-13.4072	cg01087382	NM_003188.2	GeneID:6885	6	91353911	91353628	283	TRUE	6:91352433-91353967			TAK1	TGF1a
IVNS1ABP	-1.08452	0.234175	0.110425	-20.6806	cg08358671	NM_006469.4	GeneID:10625	1	183553430	183553084	346	TRUE	1:183551785-183553696			ND1	NS-1	NS1-BP	HSPC068	KIAA0850	DKFZp686K06216
TMEM32	-1.07285	0.179434	0.0852995	-13.4212	cg21932800	NM_173470.1	GeneID:93380	X	134884524	134883800	724	TRUE	X:134883206-134884683
RBMX2	-1.06844	0.25349	0.120872	-22.615	cg26655138	NM_016024.1	GeneID:51634	X	129363768	129363688	80	TRUE	X:129363360-129364137			CGI-79
PADI4	-1.05325	0.451154	0.217403	-57.4989	cg18333690	NM_012387.1	GeneID:23569	1	17507303	17507279	24	FALSE			cg18333690	PAD	PDI4	PDI5	PADI5
CLEC10A	-1.04512	0.194	0.0940137	-14.3465	cg21550483	NM_006344.2	GeneID:10462	17	6924830	6924324	506	FALSE			cg21550483	HML	HML2	CD301	CLECSF13	CLECSF14
SLC6A4	-1.04427	0.21447	0.103994	-16.5998	cg22584138	NM_001045.2	GeneID:6532	17	25586346	25586831	485	TRUE	17:25586148-25587346			HTT	5HTT	OCD1	SERT	5-HTT	hSERT
SEC61G	-1.04042	0.248175	0.120659	-20.7088	cg00945507	NM_014302.3	GeneID:23480	7	54795171	54794433	738	TRUE	7:54793833-54795259			SSS1
RETNLB	-1.03854	0.200815	0.0977608	-14.8991	cg14659547	NM_032579.1	GeneID:84666	3	109958816	109958820	4	FALSE			cg14659547	XCP2	FIZZ1	FIZZ2	HXCP2	RELMb	RELMbeta	RELM-beta
K6IRS2	-1.03775	0.294527	0.14346	-26.9458	cg06494782	NM_080747.1	GeneID:140807	12	51281713	51281559	154	TRUE	12:51280885-51281747			KRT6	K6irs	KRT6IRS2
UBE3B	-1.02667	0.248393	0.121921	-20.275	cg20092036	NM_183414.1	GeneID:89910	12	108398524	108399822	1298	FALSE			cg20092036	MGC78388	DKFZp586K2123	DKFZp686A1051
KCTD18	-1.01524	0.189661	0.0938342	-13.1337	cg22444610	NM_152387.2	GeneID:130535	2	201083332	201083037	295	TRUE	2:201082549-201083401			FLJ31322	FLJ37818	6530404F10Rik
SPAG7	-1.00823	0.288185	0.143273	-24.6344	cg12815142	NM_004890.1	GeneID:9552	17	4813327	4811832	1495	TRUE	17:4813118-4813369			ACRP	FSA-1	MGC20134
RAB3D	-0.992654	0.19493	0.0979624	-13.0997	cg20780953	NM_004283.2	GeneID:9545	19	11311511	11311321	190	TRUE	19:11311011-11311597			GOV	D2-2	RAB16	RAD3D
ATG12	-0.991916	0.279572	0.140571	-22.615	cg26233209	NM_004707.2	GeneID:9140	5	115206663	115205398	1265	FALSE			cg26233209	APG12	APG12L	HAPG12
GTF2H4	-0.971432	0.219753	0.112074	-14.8991	cg00296685	NM_001517.4	GeneID:2968	6	30984051	30983956	95	TRUE	6:30983195-30984459			TFIIH
RUNX3	-0.95771	0.269664	0.138843	-19.9859	cg03171924	NT_004610.18	GeneID:864	1	25130919			TRUE	1:25127692-25131906			AML2	CBFA3	PEBP2aC
C9orf82	-0.95123	0.24048	0.124374	-16.3931	cg09491779	NM_024828.2	GeneID:79886	9	26883124	26882725	399	FALSE			cg09491779	FLJ13657	RP11-337A23.1
WDR32	-0.940401	0.222343	0.11586	-14.2471	cg04660234	NM_024345.2	GeneID:79269	9	37790484	37791296	812	TRUE	9:37790088-37791686			FLJ23201	MGC10765
CD40	-0.935403	0.211325	0.110501	-13.0997	cg21601405	NM_001250.3	GeneID:958	20	44180413	44180313	100	TRUE	20:44180138-44180422			p50	Bp50	CDW40	MGC9013	TNFRSF5
C21orf124	-0.929437	0.243033	0.127608	-15.8901	cg21755709	NM_032920.1	GeneID:85006	21	43973826	43973311	515	TRUE	21:43973825-43974068			PRED79	FLJ31940	MGC15873
FGF23	-0.917001	0.254607	0.134842	-16.5147	cg14119236	NM_020638.2	GeneID:8074	12	4359336	4359155	181	TRUE	12:4359234-4359462			ADHR	HYPF	HPDR2	PHPTC
L3MBTL2	-0.903219	0.246689	0.131903	-15.2218	cg14679202	NM_031488.4	GeneID:83746	22	39930924	39931259	335	TRUE	22:39930321-39931565			H-l(3)mbt-l
OR10H1	-0.897662	0.467962	0.251181	-44.8388	cg24477636	NM_013940.1	GeneID:26539	19	15780005	15779847	158	FALSE			cg24477636
ABCG4	-0.897036	0.379698	0.203894	-29.5912	cg03222066	NM_022169.3	GeneID:64137	11	118524594	118524960	366	FALSE			cg03222066	WHITE2
FLJ35801	-0.888376	0.231633	0.125133	-13.4212	cg15425811	NM_153044.1	GeneID:150291	22	29648181	29648396	215	TRUE	22:29647630-29649039
SYT8	-0.884434	0.35762	0.193722	-26.7424	cg26473272	NM_138567.2	GeneID:90019	11	1812844	1812282	562	FALSE			cg26473272	DKFZp434K0322
HYLS1	-0.872804	0.241597	0.131932	-13.7912	cg25041439	NM_145014.1	GeneID:219844	11	125258320	125258719	399	FALSE			cg25041439	FLJ32915
UNQ467	-0.865032	0.328967	0.180614	-22.1052	cg05241571	NM_207392.1	GeneID:388533	19	40673064	40673196	132	FALSE			cg05241571
HIST1H4E	-0.861209	0.250346	0.137813	-14.1962	cg16706631	NM_003545.3	GeneID:8367	6	26312802	26312852	50	TRUE	6:26312577-26313287			H4/j	H4FJ
FLJ11016	-0.855137	0.281637	0.155693	-16.62	cg03273615	NM_018301.2	GeneID:55285	X	106249029	106248690	339	FALSE			cg03273615	FLJ13670	bB383K5.1
APC2	-0.844928	0.336759	0.187487	-21.8058	cg18133957	NM_005883.2	GeneID:10297	19	1401493	1401148	345	TRUE	19:1400768-1401581			APCL
SH2D4B	-0.838104	0.503664	0.281739	-45.3299	cg08772206	NM_207372.1	GeneID:387694	10	82287773	82287638	135	FALSE			cg08772206	FLJ41984
ADAMTS13	-0.834245	0.534261	0.299655	-51.4768	cg16112945	NM_139025.2	GeneID:11093	9	135275627	135276941	1314	FALSE			cg16112945	TTP	VWFCP	C9orf8	vWF-CP	MGC118899	MGC118900	DKFZp434C2322
PON3	-0.831408	0.268398	0.150834	-14.563	cg10329418	NM_000940.1	GeneID:5446	7	94864117	94863598	519	TRUE	7:94863421-94864257
CFTR	-0.826462	0.300304	0.169345	-17.1429	cg25509184	NM_000492.2	GeneID:1080	7	116906618	116907253	635	TRUE	7:116906608-116907566			CF	MRP7	ABC35	ABCC7	TNR-CFTR	dJ760C5.1
SP2	-0.801429	0.301615	0.173061	-16.1232	cg14360917	NM_003110.4	GeneID:6668	17	43347121	43347677	556	FALSE			cg14360917
ATP4A	-0.776234	0.331943	0.193818	-17.6169	cg04713352	NM_000704.2	GeneID:495	19	40746853	40746400	453	FALSE			cg04713352	ATP6A
MMP9	-0.772318	0.279966	0.163913	-13.3242	cg02310296	NM_004994.2	GeneID:4318	20	44070765	44070954	189	FALSE			cg02310296	GELB	CLG4B
RASSF5	-0.769031	0.321898	0.188894	-16.4246	cg02589695	NT_021877.18	GeneID:83593	1	204797622			TRUE	1:204796949-204797698			RAPL	Maxp1	NORE1	RASSF3	MGC10823
SUSD1	-0.75674	0.438377	0.259445	-27.7083	cg14862827	NM_022486.3	GeneID:64420	9	113976778	113977377	599	TRUE	9:113976541-113977814			RP11-4O1.1
ARMCX2	-0.749731	0.396859	0.236018	-22.4436	cg19055639	NM_177949.1	GeneID:9823	X	100800794	100801491	697	TRUE	X:100800529-100800899			ALEX2	MGC8742	KIAA0512	MGC13343
DHX8	-0.736197	0.358251	0.215065	-17.8904	cg23347958	NM_004941.1	GeneID:1659	17	38916826	38916860	34	TRUE	17:38916405-38917727			DDX8	HRH1	PRP22	PRPF22
ZNF19	-0.732037	0.372127	0.224041	-18.9861	cg11706111	NM_006961.2	GeneID:7567	16	70080645	70080742	97	TRUE	16:70080524-70081125			KOX12	MGC51021
CENTA1	-0.730862	0.306276	0.184545	-13.5787	cg00969446	NM_006869.1	GeneID:11033	7	961192	960792	400	TRUE	7:959794-961282			GCS1L	p42IP4
GYS2	-0.719652	0.306546	0.186148	-13.1878	cg04184278	NM_021957.2	GeneID:2998	12	21649026	21648821	205	FALSE			cg04184278
GLRA2	-0.707532	0.355521	0.217709	-16.1127	cg05206587	NM_002063.2	GeneID:2742	X	14457801	14457571	230	FALSE			cg05206587	GLR
ZNF143	-0.704982	0.428007	0.262561	-22.615	cg14037413	NM_003442.3	GeneID:7702	11	9439170	9439089	81	TRUE	11:9438246-9439848			SBF	STAF	pHZ-1
HIST1H2AG	-0.699742	0.332699	0.204837	-14.1509	cg08717396	NM_021064.3	GeneID:8969	6	27208754	27208800	46	TRUE	6:27208047-27209299			H2A/p	H2AFP	H2A.1b	pH2A/f
LRRC50	-0.695612	0.348381	0.215107	-14.9769	cg08965527	NM_178452.3	GeneID:123872	16	82735714	82736423	709	TRUE	16:82735439-82737262			FLJ25330	DKFZp434A119
MORN1	-0.693871	0.585915	0.362208	-44.157	cg03533858	NM_024848.1	GeneID:79906	1	2314256	2312853	1403	FALSE			cg03533858	FLJ13941	RP4-740C4.1
CDK9	-0.687502	0.330236	0.205053	-13.4187	cg08999352	NM_001261.2	GeneID:1025	9	129587031	129588152	1121	TRUE	9:129586837-129589076			TAK	C-2k	CDC2L4	PITALRE
CHST13	-0.663649	0.388981	0.245556	-16.4246	cg22919728	NM_152889.1	GeneID:166012	3	127725180	127725866	686	FALSE			cg22919728	C4ST3	MGC119278	MGC119279	MGC119281
PSD4	-0.661541	0.351837	0.222432	-13.6762	cg21450627	NM_012455.2	GeneID:23550	2	113647311	113648031	720	FALSE			cg21450627	TIC	EFA6B
MGC39497	-0.656129	0.384984	0.244303	-15.7113	cg02789485	NM_152436.1	GeneID:144321	12	74069695	74071156	1461	FALSE			cg02789485
AQP9	-0.626479	0.396065	0.256553	-14.8991	cg11098259	NM_020980.2	GeneID:366	15	56217683	56217771	88	FALSE			cg11098259	SSC1	HsT17287
FLJ32130	-0.620085	0.447495	0.291155	-18.5029	cg12582366	NM_152458.4	GeneID:146540	16	30504041	30504511	470	TRUE	16:30503906-30504857
ABCB11	-0.615963	0.456598	0.297927	-19.0638	cg20118424	NM_003742.2	GeneID:8647	2	169595521	169596079	558	FALSE			cg20118424	BSEP	PGY4	SPGP	ABC16	PFIC2	PFIC-2
ELOVL3	-0.610547	0.4224	0.27665	-15.9387	cg18390025	NM_152310.1	GeneID:83401	10	103976726	103976133	593	TRUE	10:103976562-103976832			CIG30	CIG-30	MGC21435
TSCOT	-0.610465	0.40623	0.266075	-14.7211	cg10726357	NM_033051.2	GeneID:57864	9	114693364	114692866	498	TRUE	9:114692124-114693426			Ly110
PARK2	-0.603228	0.547291	0.36027	-27.7083	cg24816866	NM_004562.1	GeneID:5071	6	163069664	163068793	871	FALSE			cg24816866	PDJ	PRKN	AR-JP
MMP9	-0.60079	0.384692	0.253663	-13.0105	cg20925811	NM_004994.2	GeneID:4318	20	44071924	44070954	970	TRUE	20:44071899-44072184			GELB	CLG4B
SELP	-0.574183	0.430811	0.289362	-14.3979	cg09060914	NM_003005.2	GeneID:6403	1	167866182	167866031	151	FALSE			cg09060914	CD62	GRMP	PSEL	CD62P	GMP140	PADGEM	FLJ45155
BXDC1	-0.57412	0.594555	0.399361	-29.9529	cg05213296	NM_032194.1	GeneID:84154	6	111409422	111409984	562	TRUE	6:111409384-111410415			RPF2	FLJ21087	bA397G5.4
PPIE	-0.561266	0.421272	0.285499	-13.1585	cg24920358	NM_006112.2	GeneID:10450	1	39976872	39977117	245	TRUE	1:39976458-39978042			CYP-33	MGC3736	MGC111222
ABI3	-0.556922	0.54366	0.369553	-22.6258	cg21400896	NM_016428.2	GeneID:51225	17	44643568	44642588	980	FALSE			cg21400896	NESH	SSH3BP3
MATN4	-0.555418	0.529035	0.359987	-21.0497	cg14448104	NM_003833.2	GeneID:8785	20	43366970	43367645	675	TRUE	20:43366148-43367134			HE6WCR54
G10	-0.5531	0.451018	0.307393	-14.4972	cg02798801	NM_003910.2	GeneID:8896	7	98843199	98844548	1349	FALSE			cg02798801	EDG2	EDG-2	MGC111202
IFI16	-0.548938	0.440302	0.300956	-13.6254	cg21406461	NM_005531.1	GeneID:3428	1	157245581	157246332	751	FALSE			cg21406461	PYHIN2	IFNGIP1
ATP1A3	-0.545837	0.456429	0.312651	-14.4375	cg07051960	NM_152296.3	GeneID:478	19	47191459	47190222	1237	TRUE	19:47191425-47191661			RDP	DYT12	MGC13276
MGST2	-0.542377	0.637345	0.437626	-32.5512	cg02688643	NM_002413.3	GeneID:4258	4	140804973	140806372	1399	FALSE			cg02688643	GST2	MGST-II	FLJ27438	MGC14097
HLA-DOB	-0.533487	0.618121	0.427049	-28.9661	cg17103109	NM_002120.2	GeneID:3112	6	32893119	32892762	357	FALSE			cg17103109	DOB
IL1R1	-0.520244	0.551715	0.384686	-20.2906	cg15233681	NM_000877.2	GeneID:3554	2	102137034	102136834	200	FALSE			cg15233681	P80	IL1R	IL1RA	CD121A	D2S1473	IL-1R-alpha
LHPP	-0.508318	0.485237	0.341142	-14.1068	cg07596401	NM_022126.2	GeneID:64077	10	126140076	126140402	326	TRUE	10:126139604-126141042
SLC4A1	-0.507811	0.475129	0.334153	-13.4139	cg03580247	NM_000342.1	GeneID:6521	17	39701014	39700993	21	FALSE			cg03580247	DI	FR	SW	WD	WR	AE1	WD1	BND3	EPB3	CD233	EMPB3	RTA1A	MGC116750	MGC116753	MGC126619	MGC126623
SLC39A7	-0.481989	0.564036	0.403844	-18.0965	cg10940418	NM_006979.1	GeneID:7922	6	33275283	33276675	1392	FALSE			cg10940418	KE4	HKE4	ZIP7	RING5	H2-KE4	D6S115E	D6S2244E
HAMP	-0.477485	0.536278	0.38517	-15.4274	cg02131995	NM_021175.2	GeneID:57817	19	40464757	40465250	493	FALSE			cg02131995	HEPC	HFE2B	LEAP1	LEAP-1
FGFR1	-0.476868	0.531677	0.382029	-15.0472	cg15791248	NM_000604.2	GeneID:2260	8	38445887	38445293	594	FALSE			cg15791248	H2	H3	H4	H5	CEK	FLG	FLT2	KAL2	BFGFR	C-FGR	CD331	N-SAM
CDC2L2	-0.474645	0.560495	0.403357	-17.1429	cg18241160	NM_033527.1	GeneID:985	1	1645098	1645623	525	TRUE	1:1644546-1646532			CDC2L3	p58GTA	PITSLRE	CDK11-p46	CDK11-p58	MGC131975	CDK11-p110
FLJ43339	-0.446881	0.53097	0.389534	-13.0997	cg13474734	NM_207380.1	GeneID:388115	15	38418083	38417626	457	FALSE			cg13474734	DKFZp686N1468
SLC17A3	-0.444844	0.531871	0.390746	-13.0369	cg15691649	NM_006632.1	GeneID:10786	6	25990307	25990493	186	TRUE	6:25990159-25990690			NPT4
MAGEB3	-0.443626	0.563056	0.414006	-14.8991	cg14774175	NM_002365.3	GeneID:4114	X	30158839	30158474	365	FALSE			cg14774175
ZNF511	-0.423354	0.570878	0.425698	-13.9754	cg15856055	NM_145806.2	GeneID:118472	10	134971285	134972413	1128	TRUE	10:134971124-134971365			MGC30006
GDF2	-0.422606	0.577068	0.430536	-14.3004	cg05441133	NM_016204.1	GeneID:2658	10	48036897	48036859	38	TRUE	10:48036704-48037082			BMP9	BMP-9
IL16	-0.420402	0.572352	0.427671	-13.8166	cg09837803	NM_004513.3	GeneID:3603	15	79261396	79262255	859	FALSE			cg09837803	LCF	IL-16	prIL-16	FLJ44234	HsT19289
IL8RB	-0.416336	0.600178	0.449728	-15.4762	cg14150666	NM_001557.2	GeneID:3579	2	218699555	218698991	564	FALSE			cg14150666	CD182	CXCR2	IL8R2	IL8RA	CMKAR2	CDw128b
LTB4R	-0.412088	0.582995	0.438141	-13.9691	cg20542800	NM_181657.1	GeneID:1241	14	23852374	23852357	17	FALSE			cg20542800	BLT1	BLTR	P2Y7	GPR16	LTBR1	P2RY7	CMKRL1	LTB4R1
TTLL11	-0.411734	0.716296	0.538454	-28.2813	cg27218220	NM_194252.1	GeneID:158135	9	123896217	123895384	833	TRUE	9:123896020-123896348			C9orf20	bA244O19.1
GPR142	-0.409286	0.65723	0.494892	-20.275	cg22377428	NM_181790.1	GeneID:350383	17	69875477	69875240	237	FALSE			cg22377428	PGR2
C10orf39	-0.401898	0.614283	0.464927	-15.3574	cg06985415	NM_194303.1	GeneID:282973	10	133805401	133805422	21	TRUE	10:133805370-133805647			FLJ37857
GABRR1	-0.396536	0.586745	0.445738	-13.0997	cg00333528	NM_002042.2	GeneID:2569	6	89984204	89983779	425	FALSE			cg00333528
PRTN3	-0.39123	0.624157	0.475907	-15.2154	cg09134726	NM_002777.3	GeneID:5657	19	792082	791985	97	FALSE			cg09134726	MBT	P29	ACPA	AGP7	PR-3	C-ANCA
FLJ25801	-0.390113	0.645533	0.492587	-16.9979	cg25569462	NM_173553.1	GeneID:205860	4	189263854	189263402	452	FALSE			cg25569462
CBFB	-0.376886	0.66025	0.508458	-17.0315	cg13500388	NM_001755.2	GeneID:865	16	65619636	65620551	915	TRUE	16:65619345-65619667			PEBP2B
GSG1	-0.372936	0.622772	0.480911	-13.6321	cg08399444	NM_031289.1	GeneID:83445	12	13139815	13139952	137	FALSE			cg08399444	MGC3146
TLR8	-0.366077	0.637882	0.494926	-14.1967	cg07759587	NM_016610.2	GeneID:51311	X	12834704	12834679	25	FALSE			cg07759587	MGC119599	MGC119600
CMTM8	-0.339617	0.680214	0.537539	-15.0731	cg01617750	NM_178868.3	GeneID:152189	3	32254265	32255175	910	TRUE	3:32254265-32255884			CKLFSF8
CD226	-0.329803	0.722166	0.574588	-18.2204	cg13164537	NM_006566.1	GeneID:10666	18	65775051	65775139	88	FALSE			cg13164537	PTA1	DNAM1	DNAM-1	TLiSA1
INSL4	-0.329087	0.778795	0.619952	-26.6098	cg12067261	NM_002195.1	GeneID:3641	9	5221539	5221419	120	FALSE			cg12067261	EPIL	PLACENTIN
OXT	-0.319744	0.818641	0.655906	-31.5417	cg26267561	NM_000915.2	GeneID:5020	20	3000224	3000266	42	TRUE	20:3000023-3001341			OT	OT-NPI	MGC126890	MGC126892
IFI35	-0.227636	0.801899	0.684848	-14.2471	cg08090640	NM_005533.2	GeneID:3430	17	38412815	38412351	464	FALSE			cg08090640	IFP35	FLJ21753
SIL1	-0.107901	0.94085	0.873049	-13.9754	cg13326338	NM_022464.3	GeneID:64374	5	138491518	138491447	71	FALSE			cg13326338	BAP
URP2	0.152744	0.807076	0.897212	15.3409	cg24088438	NM_031471.4	GeneID:83706	11	63730805	63730782	23	FALSE			cg24088438	KIND3	MIG2B	MGC10966
PNMA6A	0.154869	0.798598	0.889096	14.3979	cg02274362	NM_032882.2	GeneID:84968	X	151992153	151991521	632	TRUE	X:151990675-151993000			MGC15827
GZMM	0.157539	0.802965	0.895613	16.0868	cg18338021	NM_005317.2	GeneID:3004	19	495349	495027	322	TRUE	19:495156-495371			MET1	LMET1
INT1	0.158567	0.801155	0.894232	16.0581	cg06942110	XM_931325.1	GeneID:26173	7	1511911	1510490	1421	TRUE	7:1511890-1512098
PLEKHA4	0.175431	0.767252	0.86646	14.571	cg08077345	NM_020904.1	GeneID:57664	19	54064085	54063670	415	FALSE			cg08077345	PEPP1
PTGER1	0.177177	0.755198	0.853879	13.237	cg10468702	NM_000955.2	GeneID:5731	19	14446209	14447174	965	TRUE	19:14443018-14446252			EP1
FLJ36445	0.177511	0.75371	0.852394	13.0997	cg21550442	NM_153233.1	GeneID:163183	19	41191679	41191509	170	FALSE			cg21550442
HK2	0.182791	0.784996	0.891031	20.6806	cg24107142	NM_000189.4	GeneID:3099	2	74913863	74913290	573	FALSE			cg24107142	HKII	HXK2	DKFZp686M1669
ALKBH	0.194014	0.72906	0.834002	13.3205	cg20385229	NM_006020.1	GeneID:8846	14	77245223	77244097	1126	FALSE			cg20385229	ABH	alkB	hABH
ALOX12	0.195935	0.72969	0.835835	13.7798	cg08946332	NM_000697.1	GeneID:239	17	6840612	6840128	484	TRUE	17:6839463-6841283			LOG12
MST1R	0.196195	0.746949	0.855759	16.5147	cg08687163	NM_002447.1	GeneID:4486	3	49915857	49916074	217	TRUE	3:49915736-49916551			RON	PTK8	CDw136
CACNG1	0.196321	0.725648	0.831427	13.3242	cg24459563	NM_000727.2	GeneID:786	17	62471071	62471168	97	TRUE	17:62471033-62471431			CACNLG
GPR77	0.205272	0.713541	0.822644	13.5343	cg10451565	NM_018485.1	GeneID:27202	19	52531971	52532211	240	FALSE			cg10451565	C5L2
SMPD2	0.208053	0.734912	0.848918	17.5075	cg20811607	NM_003080.1	GeneID:6610	6	109867524	109868659	1135	TRUE	6:109867223-109867542			NSMASE
HBZ	0.209327	0.754807	0.872669	22.3525	cg21960110	NM_005332.2	GeneID:3050	16	142482	142854	372	FALSE			cg21960110
PYGO1	0.227534	0.677313	0.793019	13.3205	cg23412777	NM_015617.1	GeneID:26108	15	53668998	53668342	656	TRUE	15:53668831-53669077			DKFZp547G0910
CALCRL	0.229406	0.675547	0.791979	13.4187	cg21350115	NM_005795.2	GeneID:10203	2	188021078	188021223	145	FALSE			cg21350115	CRLR	CGRPR
MARCH3	0.233496	0.69222	0.81383	16.4925	cg25842356	NM_178450.2	GeneID:115123	5	126395269	126394149	1120	TRUE	5:126393114-126395304			RNF173	MGC48332	MARCH-III
NOXA1	0.23401	0.671667	0.789947	13.7798	cg04837071	NM_006647.1	GeneID:10811	9	139438470	139437668	802	TRUE	9:139436592-139438641			p51NOX	FLJ25475	NY-CO-31	SDCCAG31
MTNR1B	0.234506	0.710663	0.836098	20.2521	cg17838516	NM_005959.3	GeneID:4544	11	92343184	92342437	747	TRUE	11:92342113-92343227			MEL-1B-R
KIAA1409	0.234924	0.679143	0.799246	14.8991	cg16034652	NM_020818.2	GeneID:57578	14	92868062	92869318	1256	FALSE			cg16034652	FLJ43337
EPOR	0.236043	0.734759	0.865368	26.7128	cg24477567	NM_000121.2	GeneID:2057	19	11356295	11356019	276	FALSE			cg24477567	MGC138358
NUP50	0.236924	0.736731	0.868221	27.374	cg07986773	NM_153645.1	GeneID:10762	22	43937273	43938390	1117	TRUE	22:43936901-43939556			NPAP60	NPAP60L	MGC39961	DKFZP564A043
CEP76	0.237949	0.706062	0.83267	20.2521	cg11688990	NM_024899.2	GeneID:79959	18	12694161	12692703	1458	FALSE			cg11688990	C18orf9	HsT1705	FLJ12542
ETNK2	0.240066	0.658889	0.778179	13.3396	cg01566404	NM_018208.1	GeneID:55224	1	202388548	202387645	903	FALSE			cg01566404	EKI2	FLJ10761	HMFT1716	RP11-74C13.2
TH	0.245886	0.679995	0.806352	17.2693	cg08573687	NM_199292.1	GeneID:7054	11	2149617	2149611	6	FALSE			cg08573687	TYH
RGN	0.246706	0.691053	0.819931	19.5542	cg09625066	NM_004683.4	GeneID:9104	X	46822515	46822719	204	TRUE	X:46822380-46823326			RC	SMP30
GPR172A	0.250198	0.672784	0.800189	17.1429	cg16628918	NM_024531.3	GeneID:79581	8	145551626	145553033	1407	FALSE			cg16628918	GPCR	PAR1	GPCR41	D15Ertd747e
PKN1	0.25491	0.695397	0.82979	22.615	cg19103609	NM_002741.3	GeneID:5585	19	14404524	14405166	642	TRUE	19:14403590-14405780			DBK	PKN	PAK1	PRK1	PRKCL1	MGC46204
SCAND2	0.257046	0.682881	0.816063	20.6806	cg17866455	NM_022050.2	GeneID:54581	15	82974955	82975713	758	TRUE	15:82974893-82975916
C20orf85	0.259679	0.674433	0.807439	19.7304	cg12813792	NM_178456.2	GeneID:128602	20	56159101	56159389	288	TRUE	20:56159084-56159699			bA196N14.1
SEC61A2	0.264695	0.648534	0.779138	16.5147	cg18678121	NM_018144.2	GeneID:55176	10	12210813	12211704	891	TRUE	10:12210774-12212203			FLJ10578
PLAGL1	0.264951	0.660482	0.793632	18.4792	cg17895149	NM_006718.2	GeneID:5325	6	144371522	144371246	276	TRUE	6:144370510-144371695			ZAC	LOT1	ZAC1	MGC126275	MGC126276	DKFZp781P1017
ATP6V1B1	0.265272	0.651471	0.782978	17.0756	cg06946880	NM_001692.2	GeneID:525	2	71016631	71016528	103	FALSE			cg06946880	VATB	VPP3	Vma2	RTA1B	ATP6B1	MGC32642
COX6A2	0.268357	0.616055	0.741999	13.2447	cg13726463	NM_005205.2	GeneID:1339	16	31347182	31347222	40	TRUE	16:31346216-31347186			COX6AH	COXVIAH
PHF13	0.271181	0.697551	0.841801	28.2279	cg06778853	NM_153812.1	GeneID:148479	1	6595207	6596332	1125	TRUE	1:6594739-6598463			PHF5	SPOC1	MGC43399
TRIP10	0.276258	0.692264	0.838366	28.2813	cg02085507	NM_004240.2	GeneID:9322	19	6690192	6690707	515	TRUE	19:6690009-6691192			STP	CIP4	HSTP	STOT
GTL3	0.280296	0.622597	0.75611	15.9387	cg25771195	NM_013242.2	GeneID:29105	16	56721315	56720797	518	TRUE	16:56720072-56721737
ADAM30	0.281239	0.672435	0.817169	25.2736	cg23131777	NM_021794.2	GeneID:11085	1	120240448	120240636	188	TRUE	1:120240390-120240877			svph4
SMPD3	0.284731	0.673845	0.820867	26.7128	cg17217677	NM_018667.2	GeneID:55512	16	67040695	67039905	790	TRUE	16:67039271-67040730	16:67038237-67039167	HS_254		NSMASE2	FLJ22593
SRCRB4D	0.288053	0.66942	0.817356	26.6709	cg13594711	NM_080744.1	GeneID:136853	7	75876721	75876948	227	FALSE			cg13594711	S4D-SRCRB	SRCRB-S4D
BSCL2	0.288155	0.58593	0.715466	13.0997	cg20342105	NM_032667.4	GeneID:26580	11	62231486	62231395	91	FALSE			cg20342105	SPG17	GNG3LG	MGC4694
RAD51C	0.28836	0.670157	0.818431	26.7424	cg19208681	NM_002876.2	GeneID:5889	17	54124627	54124962	335	TRUE	17:54124258-54125393			RAD51L2	MGC104277
AQP3	0.288428	0.64249	0.784679	20.7088	cg26624914	NM_004925.3	GeneID:360	9	33438382	33437590	792	FALSE			cg26624914	GIL
RPS2	0.291131	0.596039	0.729313	14.4754	cg18279742	NM_002952.3	GeneID:6187	16	1955704	1954828	876	TRUE	16:1953433-1955741			LLREP3	MGC102851	MGC117344	MGC117345
ISG20	0.294308	0.712732	0.874021	43.0981	cg02334775	NM_002201.4	GeneID:3669	15	86983680	86983043	637	TRUE	15:86983615-86983821			CD25	HEM45
ABI3	0.295209	0.625178	0.767133	19.2608	cg25839227	NM_016428.2	GeneID:51225	17	44643501	44642588	913	FALSE			cg25839227	NESH	SSH3BP3
EGF	0.297003	0.589242	0.723937	14.5934	cg13379236	NM_001963.2	GeneID:1950	4	111053257	111053499	242	FALSE			cg13379236	URG
MEST	0.303048	0.569759	0.702939	13.4269	cg09872616	NM_177524.1	GeneID:4232	7	129913418	129913282	136	TRUE	7:129912883-129914215			PEG1	MGC8703	MGC111102	DKFZp686L18234
MERTK	0.309866	0.63458	0.78662	24.5888	cg08023751	NM_006343.2	GeneID:10461	2	112371583	112372662	1079	TRUE	2:112371396-112371690			MER	c-mer
STRN4	0.310672	0.65124	0.807723	28.2813	cg14799446	NM_013403.1	GeneID:29888	19	51942447	51941527	920	FALSE			cg14799446	ZIN	zinedin
ALAS1	0.316222	0.593658	0.739144	18.5029	cg03929796	NM_199166.1	GeneID:211	3	52206880	52207156	276	TRUE	3:52206843-52207774			ALAS	MIG4	ALAS3	ALASH
NTF3	0.323744	0.615932	0.770885	24.1302	cg02554564	NM_002527.3	GeneID:4908	12	5473392	5473527	135	TRUE	12:5473265-5473465			NT3	HDNF	NGF2	NGF-2	MGC129711
ACOX2	0.324422	0.562965	0.704924	15.8247	cg22012981	NM_003500.2	GeneID:8309	3	58497729	58497956	227	FALSE			cg22012981	BCOX	BRCOX	THCCox	BRCACOX
CAPN2	0.32473	0.587762	0.736131	19.2608	cg14972271	NM_001748.3	GeneID:824	1	221966359	221966824	465	TRUE	1:221965941-221967552			mCANP	CANPL2	CANPml
RBM13	0.325673	0.596803	0.747943	20.8209	cg23663332	NM_032509.2	GeneID:84549	8	33461496	33462259	763	TRUE	8:33461192-33462760
HEXIM1	0.328682	0.605166	0.760007	22.9779	cg04700814	NM_006460.2	GeneID:10614	17	40579963	40580467	504	FALSE			cg04700814	CLP1	HIS1	MAQ1
ZC3H7A	0.331984	0.631066	0.79435	29.1207	cg14959707	NM_014153.2	GeneID:29066	16	11783892	11783909	17	TRUE	16:11783829-11784227			ZC3H7	HSPC055	ZC3HDC7	FLJ10027	FLJ20318
MAB21L2	0.333031	0.598598	0.754028	22.6611	cg20334738	NM_006439.3	GeneID:10586	4	151722389	151722753	364	FALSE			cg20334738	FLJ31103
ZNF583	0.334373	0.621721	0.783884	28.0747	cg12445208	NM_152478.1	GeneID:147949	19	61608017	61607530	487	TRUE	19:61606860-61608033			FLJ31030
C9orf66	0.336381	0.533755	0.673911	14.2899	cg08909157	NM_152569.1	GeneID:157983	9	205561	205741	180	TRUE	9:203685-205584			FLJ31158	RP11-59O6.1
FLJ33790	0.3367	0.519638	0.656232	13.0947	cg16547529	NM_173583.1	GeneID:283212	11	74818329	74818755	426	TRUE	11:74818131-74820083
KCNA3	0.337966	0.525405	0.664097	13.6762	cg00995520	NM_002232.2	GeneID:3738	1	111019805	111019178	627	TRUE	1:111017242-111019922			MK3	HGK5	HLK3	PCN3	HPCN3	KV1.3	HUKIII	MGC41884
JAK2	0.345332	0.667115	0.847531	46.2379	cg20394284	NM_004972.2	GeneID:3717	9	4974206	4975245	1039	TRUE	9:4974182-4975767
TJAP1	0.347458	0.58755	0.747549	24.0793	cg00229387	NM_080604.1	GeneID:93643	6	43553920	43553289	631	FALSE			cg00229387	PILT	TJP4	RP3-337H4.1	DKFZp686F06131
FBXO17	0.348776	0.543199	0.691753	17.1429	cg24010336	NM_024907.5	GeneID:115290	19	44159098	44158220	878	TRUE	19:44159079-44159662			FBG4	Fbx17	FBXO26	MGC9379	FLJ11798	FLJ25205
C20orf165	0.36138	0.543221	0.697851	19.2608	cg21023770	NM_080608.3	GeneID:128497	20	43950634	43949645	989	FALSE			cg21023770	dJ337O18.8
FLJ43806	0.373409	0.480481	0.62242	13.6388	cg17657618	NM_201628.1	GeneID:399563	1	15300241	15300684	443	TRUE	1:15300118-15300318			MGC126686	RP1-21O18.1
HLA-DOB	0.373961	0.564096	0.731015	25.4733	cg04576021	NM_002120.2	GeneID:3112	6	32892233	32892762	529	FALSE			cg04576021	DOB
CCRL2	0.38186	0.474443	0.618209	14.0714	cg14754581	NM_003965.4	GeneID:9034	3	46423757	46423725	32	FALSE			cg14754581	HCR	CKRX	CRAM-A	CRAM-B	MGC116710
MRPS26	0.382285	0.484258	0.631185	14.9769	cg26060255	NM_030811.3	GeneID:64949	20	2973968	2974675	707	FALSE			cg26060255	GI008	RPMS13	MRP-S13	MRP-S26	NY-BR-87	C20orf193	dJ534B8.3
MGC15875	0.383643	0.49974	0.651977	16.9828	cg18042806	NM_032921.1	GeneID:85007	5	177592577	177592397	180	TRUE	5:177591693-177592655			MGC45484	MGC117348
RTEL1	0.383917	0.61495	0.802436	41.8932	cg05358404	NM_016434.2	GeneID:51750	20	61759394	61760091	697	TRUE	20:61759313-61761230			NHL	RTEL	C20orf41	KIAA1088	TNFRSF6B	bK3184A7.3	DKFZP434C013
CCL8	0.389518	0.457005	0.598656	13.3205	cg01636591	NM_005623.2	GeneID:6355	17	29670269	29670179	90	FALSE			cg01636591	HC14	MCP2	MCP-2	SCYA8	SCYA10
CPD	0.390059	0.55765	0.73077	27.7083	cg07156669	NM_001304.3	GeneID:1362	17	25729371	25730110	739	TRUE	17:25729327-25731039
PLEK2	0.393465	0.541366	0.711108	25.2736	cg17641252	NM_016445.1	GeneID:26499	14	66948288	66948581	293	TRUE	14:66948159-66949047
KENAE	0.39527	0.561438	0.738398	29.1207	cg15003158	NM_176816.2	GeneID:202243	5	68664187	68664299	112	TRUE	5:68664081-68665657
CLUL1	0.396246	0.496412	0.653317	18.3982	cg11214889	NM_199167.1	GeneID:27098	18	587111	586998	113	TRUE	18:586591-587668			RA337M
PCDHGC4	0.404664	0.496266	0.656947	19.727	cg15361590	NM_018928.2	GeneID:56098	5	140844885	140844925	40	TRUE	5:140844389-140845813			MGC119489	PCDH-GAMMA-C4
GSN	0.410515	0.446357	0.59328	14.4972	cg17071957	NM_000177.3	GeneID:2934	9	123069747	123070228	481	TRUE	9:123069482-123069814			DKFZp313L0718
SH2D3A	0.411691	0.43874	0.583632	13.9754	cg01036779	NM_005490.1	GeneID:10045	19	6719251	6718480	771	TRUE	19:6718910-6719312			NSP1
FAM83F	0.41491	0.515321	0.687034	24.6344	cg21771250	NM_138435.1	GeneID:113828	22	38735995	38735638	357	TRUE	22:38735888-38736264
IL1R2	0.415338	0.500678	0.66771	22.1052	cg20340242	NM_004633.3	GeneID:7850	2	101974781	101974738	43	TRUE	2:101974583-101974787			IL1RB	CD121b	MGC47725
RLN2	0.415789	0.542963	0.724328	29.5912	cg02875297	NM_134441.1	GeneID:6019	9	5294611	5294580	31	TRUE	9:5293703-5294659			H2	RLXH2	bA12D24.1.1	bA12D24.1.2
HPX	0.421631	0.44026	0.589703	15.089	cg11547724	NM_000613.1	GeneID:3263	11	6419028	6418769	259	FALSE			cg11547724
PEX10	0.424729	0.428676	0.575421	14.3465	cg20664247	NM_002617.3	GeneID:5192	1	2335335	2333870	1465	TRUE	1:2335193-2335428			NALD	RNF69	MGC1998
ECRG4	0.42865	0.465621	0.626714	19.0611	cg10885338	NM_032411.1	GeneID:84417	2	106049072	106048545	527	TRUE	2:106048153-106049083
MTHFS	0.436121	0.448195	0.606391	17.7962	cg23855392	NM_006441.1	GeneID:10588	15	77976837	77976398	439	TRUE	15:77975766-77976918			HsT19268
TCF8	0.437836	0.425522	0.5764	15.3924	cg24861272	NM_030751.2	GeneID:6935	10	31647159	31648148	989	TRUE	10:31647064-31650188			BZP	ZEB	ZEB1	AREB6	PPCD3	ZFHEP	NIL-2A	ZFHX1A	NIL-2-A	MGC133261
COPS7B	0.454588	0.466195	0.638869	22.9779	cg05422352	NM_022730.1	GeneID:64708	2	232358991	232359406	415	TRUE	2:232358962-232360229			FLJ12612	MGC111077
RELB	0.462255	0.525926	0.724565	37.209	cg02727285	NM_006509.2	GeneID:5971	19	50196082	50196552	470	TRUE	19:50195726-50197301			I-REL
NME5	0.479278	0.432072	0.602328	21.583	cg13707560	NM_003551.2	GeneID:8382	5	137502599	137503031	432	TRUE	5:137502546-137502930			NM23H5	NM23-H5
GLRB	0.483366	0.385029	0.538271	16.0868	cg18344745	NM_000824.2	GeneID:2743	4	158216529	158216788	259	TRUE	4:158216462-158217324
NANP	0.487136	0.37086	0.51982	14.9223	cg20318748	NM_152667.1	GeneID:140838	20	25553178	25552614	564	TRUE	20:25551644-25553461			HDHD4	MGC26833	C20orf147	dJ694B14.3
MBTPS2	0.509351	0.353467	0.503129	15.2813	cg27465531	NM_015884.1	GeneID:51360	X	21767633	21767675	42	TRUE	X:21767344-21768282			S2P
HFE2	0.534791	0.439577	0.63683	31.4064	cg06589885	NM_145277.3	GeneID:148738	1	144124550	144124635	85	FALSE			cg06589885	JH	HJV	RGMC	HFE2A	MGC23953
ICAM4	0.548526	0.351945	0.514751	19.1988	cg21494776	NM_001544.2	GeneID:3386	19	10258780	10258680	100	TRUE	19:10258558-10259935			LW
CD9	0.56328	0.346248	0.511624	20.2521	cg08519905	NM_001769.2	GeneID:928	12	6179035	6179816	781	TRUE	12:6178825-6180741			5H9	BA2	P24	GIG2	MIC3	MRP-1	BTCC-1	DRAP-27	TSPAN29
MTAP	0.568427	0.293682	0.435502	14.3955	cg25162921	NM_002451.3	GeneID:4507	9	21791897	21792635	738	TRUE	9:21791708-21793468			MSAP	c86fus
C1orf135	0.570261	0.389423	0.578213	28.1572	cg02327719	NM_024037.1	GeneID:79000	1	26057973	26058435	462	TRUE	1:26057917-26058914			MGC2603	FLJ14264
TMEM109	0.574549	0.347031	0.516802	21.5171	cg10735607	NM_024092.1	GeneID:79073	11	60437091	60438253	1162	TRUE	11:60436776-60437102			MGC5508
NIFIE14	0.583754	0.285395	0.427735	14.7145	cg00739120	NM_032635.2	GeneID:10430	19	40727715	40728385	670	TRUE	19:40727497-40728997			MGC1936
MVP	0.5852	0.463878	0.695932	52.2053	cg00334507	NM_017458.2	GeneID:9961	16	29732100	29731591	509	FALSE			cg00334507	LRP	VAULT1
Bles03	0.585723	0.265305	0.398167	13.0947	cg10467098	NM_031450.2	GeneID:83638	11	65444468	65443107	1361	FALSE			cg10467098	P5326
PPP2R5A	0.588123	0.294398	0.442566	16.0868	cg23909343	NM_006243.2	GeneID:5525	1	210524538	210525502	964	TRUE	1:210524499-210526748
ALOX12	0.589677	0.361662	0.544269	26.173	cg03760483	NM_000697.1	GeneID:239	17	6840021	6840128	107	TRUE	17:6839463-6841283			LOG12
NTF3	0.590443	0.342694	0.515998	22.6365	cg04740359	NM_002527.3	GeneID:4908	12	5473803	5473527	276	TRUE	12:5473723-5474332			NT3	HDNF	NGF2	NGF-2	MGC129711
WNT1	0.59294	0.259957	0.392097	13.0929	cg21948783	NM_005430.2	GeneID:7471	12	47658741	47658503	238	TRUE	12:47657768-47661963			INT1
IL1RN	0.593479	0.301089	0.454308	17.2192	cg11783497	NM_000577.3	GeneID:3557	2	113591763	113591941	178	FALSE			cg11783497	IRAP	IL1F3	IL1RA	IL-1ra3	ICIL-1RA	MGC10430
ADRB1	0.600699	0.254902	0.386547	13.0997	cg04589904	NM_000684.1	GeneID:153	10	115792830	115793796	966	TRUE	10:115792649-115795530			RHR	B1AR	ADRB1R	BETA1AR
COX6A2	0.602129	0.335796	0.509722	22.9779	cg24110063	NM_005205.2	GeneID:1339	16	31347253	31347222	31	FALSE			cg24110063	COX6AH	COXVIAH
WDR47	0.609064	0.360675	0.550126	28.2813	cg19695867	NM_014969.3	GeneID:22911	1	109386913	109386258	655	TRUE	1:109386911-109387202			KIAA0893
TMEM41A	0.609928	0.311747	0.475784	20.3797	cg11285843	NM_080652.2	GeneID:90407	3	186699824	186699496	328	TRUE	3:186698388-186699889			MGC15397	2900010K02Rik
FLT1	0.613486	0.292231	0.447099	18.0965	cg01899253	NM_002019.2	GeneID:2321	13	27968056	27967232	824	TRUE	13:27965729-27968100			FLT	VEGFR1
MMP10	0.620435	0.317998	0.488871	22.461	cg02061229	NM_002425.1	GeneID:4319	11	102156418	102156554	136	FALSE			cg02061229	SL-2	STMY2
MAPK10	0.623318	0.438134	0.674908	53.2967	cg17452384	NM_002753.2	GeneID:5602	4	87593261	87593307	46	FALSE			cg17452384	JNK3	JNK3A	PRKM10	p493F12	FLJ12099	MGC50974	p54bSAPK
DHX15	0.640209	0.329226	0.513117	26.9441	cg08739282	NM_001358.2	GeneID:1665	4	24195609	24195282	327	TRUE	4:24194254-24196061			DBP1	HRH2	DDX15	PRP43	PRPF43	PrPp43p
CDH5	0.643882	0.255655	0.399468	16.0918	cg22319147	NM_001795.2	GeneID:1003	16	64958100	64958064	36	FALSE			cg22319147	7B4	CD144
ALDH1A3	0.667408	0.275177	0.43704	20.7703	cg26509022	NT_035325.6	GeneID:220	15	99236819			TRUE	15:99236455-99238833			ALDH6	RALDH3	ALDH1A6
DAZAP1	0.668332	0.377059	0.599235	43.418	cg06341721	NM_018959.2	GeneID:26528	19	1357759	1358584	825	TRUE	19:1357198-1360039			MGC19907
BST2	0.678884	0.217924	0.348874	14.2886	cg01254505	NM_004335.2	GeneID:684	19	17377470	17377384	86	FALSE			cg01254505	CD317
FOSL1	0.698005	0.238279	0.386551	18.2129	cg18818531	NM_005438.2	GeneID:8061	11	65424853	65424573	280	TRUE	11:65423063-65425238			FRA1	fra-1
MAPK13	0.712382	0.2468	0.404384	20.7088	cg24155668	NM_002754.3	GeneID:5603	6	36206376	36206240	136	TRUE	6:36205912-36207197			SAPK4	PRKM13	MGC99536	p38delta
GPR75	0.720561	0.195156	0.321582	14.2471	cg14832904	NM_006794.1	GeneID:10936	2	53940532	53940572	40	TRUE	2:53940114-53941112			GPR-chr2	WI-31133
SCP2	0.731612	0.189252	0.314252	14.2126	cg27535305	NM_001007098.1	GeneID:6342	1	53165238	53165536	298	TRUE	1:53164678-53166557			NLTP	SCPX	NSL-TP	DKFZp686C12188	DKFZp686D11188
OSBPL5	0.731632	0.189366	0.314446	14.2201	cg20345446	NM_020896.2	GeneID:114879	11	3143380	3143116	264	TRUE	11:3142568-3143433			ORP5	OBPH1
ATXN10	0.736789	0.287131	0.478493	30.0526	cg20269537	NM_013236.2	GeneID:25814	22	44445738	44446351	613	FALSE			cg20269537	E46L	SCA10	FLJ37990
NADSYN1	0.737265	0.28534	0.475666	29.9529	cg20728496	NM_018161.4	GeneID:55191	11	70841203	70841865	662	TRUE	11:70841005-70842753			FLJ10631
CYP2S1	0.738241	0.20743	0.346023	16.9828	cg03940103	NM_030622.5	GeneID:29785	19	46390663	46391010	347	TRUE	19:46390447-46391221
MSX1	0.740434	0.262712	0.438907	26.7128	cg20161179	NT_006051.17	GeneID:4487	4	4914183			TRUE	4:4913563-4914786			HOX7	HYD1	OFC5
C16orf48	0.791089	0.205397	0.355415	20.7088	cg26335299	NM_032140.1	GeneID:84080	16	66257644	66258129	485	TRUE	16:66257367-66258718			DKFZP434A1319
GREM1	0.821497	0.146486	0.258875	13.4269	cg18145505	NM_013372.5	GeneID:26585	15	30796790	30797497	707	TRUE	15:30796667-30799245			DRM	PIG2	DAND2	IHG-2	GREMLIN	CKTSF1B1	MGC126660
LTF	0.824899	0.147772	0.261765	13.8166	cg15261665	NM_002343.2	GeneID:4057	3	46481378	46481399	21	TRUE	3:46481007-46481567			HLF2	GIG12
KCTD12	0.852895	0.132805	0.239863	13.0953	cg15901783	NM_138444.2	GeneID:115207	13	76359427	76358526	901	TRUE	13:76357231-76359636			PFET1	C13orf2	KIAA1778
PLXDC1	0.854877	0.157515	0.284882	16.9979	cg14601284	NM_020405.3	GeneID:57125	17	34561804	34561298	506	FALSE			cg14601284	TEM3	TEM7	FLJ45632
BHMT	0.85604	0.133934	0.24243	13.3242	cg10660256	NM_001713.1	GeneID:635	5	78443439	78443439	0	TRUE	5:78443059-78443592
WDR69	0.864895	0.13717	0.249814	14.2471	cg14329157	NM_178821.1	GeneID:164781	2	228444379	228444571	192	TRUE	2:228444287-228444815			FLJ25955
ADAMTS18	0.885339	0.127523	0.23556	13.6762	cg20807545	NM_139054.2	GeneID:170692	16	76027039	76026512	527	TRUE	16:76025670-76027234			ADAMTS21
HEYL	0.89213	0.139732	0.259331	16.0868	cg25462291	NM_014571.2	GeneID:26508	1	39877643	39877905	262	TRUE	1:39877450-39878424
MGC13125	0.91773	0.152834	0.288724	20.275	cg05862431	NM_032725.2	GeneID:84811	11	116149408	116148914	494	TRUE	11:116148339-116149455
ZIC1	0.93546	0.238684	0.456483	46.2379	cg14456683	NM_003412.3	GeneID:7545	3	148609700	148609871	171	TRUE	3:148609249-148612068			ZIC	ZNF201
PHKG1	0.936719	0.111172	0.212803	13.2548	cg05724065	NM_006213.2	GeneID:5260	7	56128022	56128121	99	FALSE			cg05724065	PHKG
GPD1L	0.948255	0.169313	0.326697	26.7128	cg21255732	NM_015141.2	GeneID:23171	3	32123501	32123148	353	TRUE	3:32122715-32123925			KIAA0089
RAB7L1	0.968001	0.127903	0.250194	18.0965	cg09635067	NM_003929.1	GeneID:8934	1	204010631	204010747	116	TRUE	1:204010334-204011389			RAB7L
PAOX	0.984457	0.10062	0.199084	13.2813	cg18361093	NM_207129.1	GeneID:196743	10	135043202	135042731	471	TRUE	10:135041675-135043320			PAO	MGC45464	DKFZp434J245	RP11-122K13.11
PTPRR	1.0316	0.109071	0.222972	17.1875	cg23694248	NM_002849.2	GeneID:5801	12	69600582	69600853	271	TRUE	12:69600579-69600967			PTPRQ	EC-PTP	PCPTP1	PTP-SL	PTPBR7	DKFZp781C1038
MLH3	1.03962	0.153057	0.314638	29.3569	cg24482053	NM_014381.1	GeneID:27030	14	74587756	74587886	130	TRUE	14:74587314-74588130			HNPCC	HNPCC7	S240II117
C22orf16	1.04651	0.112997	0.233397	19.0829	cg03290040	NM_213720.1	GeneID:400916	22	22440355	22440141	214	TRUE	22:22439507-22441179			N27C7-4	MGC70831
FLJ23554	1.05124	0.0984901	0.204102	15.6476	cg21795497	NM_024806.2	GeneID:79864	11	122258536	122258683	147	TRUE	11:122258441-122259357
HCFC1R1	1.06462	0.120656	0.252368	22.3525	cg02062650	NM_001002017.1	GeneID:54985	16	3014538	3014288	250	TRUE	16:3013862-3014613			HPIP	FLJ20568	MGC70711	MGC99622
HMFN0839	1.10838	0.107426	0.231615	21.1235	cg10685945	NM_032717.3	GeneID:84803	4	84676846	84676677	169	TRUE	4:84675528-84677242			MGC11324
HOXD10	1.12631	0.0796762	0.173933	14.1439	cg21591742	NM_002148.2	GeneID:3236	2	176689244	176689746	502	TRUE	2:176688866-176689812			HOX4	HOX4D	HOX4E
ALPL	1.12771	0.0833784	0.182192	15.089	cg23352747	NM_000478.2	GeneID:249	1	21708023	21708456	433	TRUE	1:21707968-21709033			HOPS	TNAP	TNSALP	AP-TNAP
ICAM5	1.13799	0.146675	0.322793	36.8975	cg11195002	NM_003259.2	GeneID:7087	19	10260805	10261655	850	TRUE	19:10260371-10267511			TLN	TLCN
IL11RA	1.13983	0.0800593	0.176414	14.6982	cg21504624	NM_004512.3	GeneID:3590	9	34643580	34643932	352	FALSE			cg21504624	MGC2146
BRSK2	1.14729	0.0880083	0.194936	17.2803	cg14021073	NM_003957.1	GeneID:9024	11	1366961	1367705	744	TRUE	11:1366566-1368933			SAD1	STK29	PEN11B	C11orf7
MAPK11	1.15317	0.0772116	0.171721	14.4375	cg00164898	NM_138993.2	GeneID:5600	22	49051254	49050906	348	TRUE	22:49050256-49052718			P38B	SAPK2	p38-2	PRKM11	SAPK2B	p38Beta	P38BETA2
RAX	1.18776	0.0795998	0.181328	16.5657	cg19576304	NM_013435.1	GeneID:30062	18	55091002	55091605	603	TRUE	18:55090435-55093173			RX
MAMDC2	1.22066	0.0812179	0.189281	18.7798	cg11656547	NM_153267.3	GeneID:256691	9	71848567	71848340	227	TRUE	9:71848534-71849733			MGC21981
CHDH	1.22385	0.0745318	0.174084	16.5147	cg07356771	NM_018397.1	GeneID:55349	3	53854990	53855216	226	TRUE	3:53854601-53856178
ZNF441	1.2822	0.0702847	0.170939	17.5075	cg03405173	NM_152355.1	GeneID:126068	19	11738721	11738907	186	TRUE	19:11738608-11739834			FLJ38637
FAM46C	1.30101	0.0607976	0.149807	14.6176	cg01152499	NM_017709.2	GeneID:54855	1	117949843	117950127	284	TRUE	1:117949333-117951379			FLJ20202
HOXD11	1.30294	0.0939056	0.231694	28.3046	cg16632715	NM_021192.2	GeneID:3237	2	176680359	176680330	29	TRUE	2:176679513-176681344			HOX4	HOX4F
SCO2	1.33542	0.0885045	0.223341	28.2813	cg24856732	NM_005138.1	GeneID:9997	22	49310352	49310838	486	TRUE	22:49309999-49312129			SCO1L	MGC125823	MGC125825
FOXE3	1.35879	0.0710948	0.182337	21.6191	cg18815943	NM_012186.1	GeneID:2301	1	47654901	47654331	570	TRUE	1:47654351-47655785			ASMD	FKHL12	FREAC8
SORCS3	1.36588	0.0634606	0.16356	18.4349	cg16787600	NM_014978.1	GeneID:22986	10	106390870	106390849	21	TRUE	10:106389391-106393271			SORCS	RP11-107L7.1
HSPC065	1.37416	0.0747608	0.193793	24.3864	cg15272690	NM_014157.2	GeneID:29070	16	56841525	56841364	161	TRUE	16:56841079-56841615			FLJ23555	DKFZP434N1418
ATP1B1	1.38304	0.0563559	0.146986	15.9093	cg16959606	NM_001677.3	GeneID:481	1	167341558	167342571	1013	TRUE	1:167341291-167343181			ATP1B	MGC1798
SNX10	1.38665	0.0830714	0.217207	28.8056	cg10316381	NM_013322.2	GeneID:29887	7	26297989	26298040	51	TRUE	7:26297706-26298638			MGC33054
PYCARD	1.39628	0.0802275	0.211177	28.2813	cg05361373	NM_013258.3	GeneID:29108	16	31121384	31121752	368	TRUE	16:31120978-31121976			ASC	TMS1	CARD5	MGC10332
C22orf8	1.40982	0.0783401	0.208152	28.2279	cg13438834	NM_017911.1	GeneID:55007	22	44085194	44084479	715	TRUE	22:44083482-44085479			FLJ20635
FAM111B	1.45479	0.0766613	0.210142	29.5912	cg21833459	NM_198947.1	GeneID:374393	11	58630531	58631286	755	TRUE	11:58630327-58631670			CANP
FTSJ3	1.49136	0.0475853	0.133788	15.5321	cg07844572	NM_017647.2	GeneID:117246	17	59257785	59258188	403	TRUE	17:59257457-59259153			EPCS3	FLJ20062
UTF1	1.49212	0.0490336	0.137932	16.3931	cg09053680	NM_003577.2	GeneID:8433	10	134894104	134893768	336	TRUE	10:134892848-134895213
DOC2A	1.50254	0.0498793	0.141329	17.1875	cg03920233	NM_003586.2	GeneID:8448	16	29930200	29929902	298	TRUE	16:29929602-29930548
EGFR	1.53576	0.0523771	0.151863	20.2521	cg03860890	NM_201282.1	GeneID:1956	7	55053782	55054219	437	TRUE	7:55053462-55055739			ERBB	mENA	ERBB1
KLHL25	1.58077	0.0475065	0.142106	19.0391	cg24345138	NM_022480.2	GeneID:64410	15	84138437	84139104	667	TRUE	15:84138113-84139588			ENC2	FLJ12587
RAB36	1.7095	0.0604125	0.197578	35.3853	cg13894021	NM_004914.2	GeneID:9609	22	21817383	21817513	130	TRUE	22:21817260-21818058
DCUN1D5	1.79391	0.036161	0.12539	18.9861	cg11995303	NM_032299.2	GeneID:84259	11	102468371	102468079	292	TRUE	11:102467300-102468412			MGC2714	FLJ32431
PRTFDC1	1.83473	0.0468309	0.167048	30.0181	cg04180868	NM_020200.5	GeneID:56952	10	25281468	25281539	71	TRUE	10:25280993-25282054			HHGP	FLJ11888
GSTM1	1.83774	0.045634	0.163119	29.3569	cg17901463	NM_000561.2	GeneID:2944	1	110031996	110031965	31	TRUE	1:110031594-110032306			MU	H-B	GST1	GTH4	GTM1	MU-1	GSTM1-1	MGC26563	GSTM1a-1a	GSTM1b-1b
DDIT3	1.86079	0.0411131	0.149326	26.7424	cg15021531	NM_004083.4	GeneID:1649	12	56200195	56200567	372	TRUE	12:56200006-56202042			CHOP	CEBPZ	CHOP10	GADD153	MGC4154
FEN1	1.92829	0.0281638	0.107193	16.0868	cg02005336	NM_004111.4	GeneID:2237	11	61316699	61316726	27	TRUE	11:61316278-61317629	11:61314902-61315199	HSA-MIR-611		MF1	RAD2	FEN-1
PPP2CB	1.99491	0.0471095	0.187774	41.9031	cg24698622	NM_001009552.1	GeneID:5516	8	30790139	30789894	245	TRUE	8:30788471-30790153			PP2CB
TYK2	2.27786	0.0426406	0.206788	57.4989	cg08896629	NM_003331.3	GeneID:7297	19	10352577	10352211	366	TRUE	19:10351757-10352815			JTK1

## Sheet: P10-P24 GEx
SYMBOL	Fold	P10_0Gy.AVG_Signal	P24_0Gy.AVG_Signal	P24_0Gy.Diff Pval	ILMN_GENE	CHROMOSOME	ENTREZ_GENE_ID	UNIGENE_ID	SYNONYMS
CCL2	-2.30622	818.568	165.506	1.24411e-06	CCL2	17	6347		SMC-CF	MCP1	MCAF	HSMCR30	GDCF-2	SCYA2	HC11	MGC9434	MCP-1	GDCF-2 HC11
TMSB15A	-2.05286	1453.83	350.383	2.49946e-33	TMSB15A	X	11013		Tb15	TMSNB	TbNB
SCD	-1.74105	2557.65	765.123	2.7711e-14	SCD	10	6319		SCD1	PRO0998	MSTP008	FADS5
TMEFF2	-1.50197	620.693	219.148	6.6389e-21	TMEFF2	2	23671		TPEF	TENB2	TR	HPP1
PHGDH	-1.39662	2283.48	867.306	2.91943e-35	PHGDH	1	26227		PGD	3-PGDH	PGDH	PDG	SERA	PGAD	MGC3017	3PGDH
ENPP1	-1.3571	582.33	227.322	1.49811e-27	ENPP1	6	5167		PCA1	PDNP1	M6S1	NPPS	PC-1	NPP1
SLFN11	-1.32852	627.685	249.93	1.04925e-23	SLFN11	17	91607		FLJ34922	SLFN8/9
SLIT2	-1.32635	672.153	268.038	2.31055e-33	SLIT2	4	9353		Slit-2	SLIL3	FLJ14420
SOX11	-1.26449	714.185	297.277	4.62536e-35	SOX11	2	6664
CLDN11	-1.19824	11440.7	4985.91	8.60925e-10	CLDN11	3	5010		OSP	OTM
CDCA7	-1.19234	611.839	267.735	4.21935e-18	CDCA7	2	83879		MGC34109	JPO1	FLJ14736	FLJ14722
CLEC14A	-1.17554	308.176	136.435	2.09892e-10	CLEC14A	14	161198		C14orf27	CEG1
CKS2	-1.15763	4227.09	1894.79	2.6806e-15	CKS2	9	1164		CKSHS2
DLGAP5	-1.15693	1280.27	574.157	4.4653e-27	DLGAP5	14	9787		DLG1	HURP	KIAA0008
MCM6	-1.14369	1830.68	828.567	2.91943e-35	MCM6	2	4175		Mis5	P105MCM	MCG40308
HMGB2	-1.13751	1733.34	787.881	1.80147e-18	HMGB2	4	3148		HMG2
CENPF	-1.05894	904.923	434.349	2.91943e-35	CENPF	1	1063		PRO1779	hcp-1	CENF
LMO4	-1.05015	2834.26	1368.72	2.20083e-17	LMO4	1	8543
COL3A1	-1.0461	2682.03	1298.85	1.31193e-07	COL3A1	2	1281		FLJ34534	EDS4A
GINS2	-1.04554	1173.86	568.693	1.58778e-10	GINS2	16	51659		Pfs2	PSF2	HSPC037
NUSAP1	-1.04424	1150.17	557.717	3.99412e-19	NUSAP1	15	51203		LNP	FLJ13421	SAPL	BM037	PRO0310p1	Q0310	ANKT
KIF20A	-1.04298	1624.46	788.389	2.91943e-35	KIF20A	5	10112		RAB6KIFL	MKLP2	FLJ21151
ABCA1	-1.03964	929.203	452.009	1.18056e-07	ABCA1	9	19		CERP	ABC-1	MGC164864	MGC165011	HDLDT1	ABC1	TGD	FLJ14958
DPYSL3	-1.02567	1774.95	871.821	4.34817e-05	DPYSL3	5	1809		DRP3	CRMP4	ULIP	DRP-3	CRMP-4
HBD	-1.0176	366.876	181.214	0.010282	HBD	11	3045
MXRA5	-1.00939	329.268	163.566	4.4963e-17	MXRA5	X	25878		DKFZp564I1922
SOCS1	-1.00704	389.073	193.59	9.67934e-19	SOCS1	16	8651		SSI-1	CISH1	SSI1	CIS1	JAB	TIP3	SOCS-1
CSRP2	-1.00503	3323.53	1655.98	2.93392e-08	CSRP2	12	1466		CRP2	LMO5	SmLIM
HMMR	-0.999807	889.309	444.714	1.27392e-31	HMMR	5	3161		RHAMM	MGC119495	IHABP	MGC119494	CD168
TTK	-0.99575	914.635	458.666	9.51676e-11	TTK	6	7272		PYT	MPS1L1	FLJ38280	ESK
GRPR	-0.995103	366.521	183.883	0.000469164	GRPR	X	2925
PLK4	-0.994976	635.239	318.728	1.0119e-34	PLK4	4	10733		SAK	STK18
CCNB1	-0.989786	793.1	399.367	1.50935e-22	CCNB1	5	891		CCNB
SERPINB7	-0.97738	1779.54	903.831	2.23212e-12	SERPINB7	18	8710		MEGSIN	MGC120014	MGC120015	DKFZp686D06190
CBX5	-0.966845	1867.05	955.228	1.56552e-15	CBX5	12	23468		HP1-ALPHA	HP1	HP1Hs-alpha
RPA3	-0.958084	1907.9	982.071	1.06518e-18	RPA3	7	6119		REPA3
CENPA	-0.944476	563.97	293.049	2.86525e-11	CENPA	2	1058		CENP-A
ARNT2	-0.932076	502.123	263.164	2.32091e-18	ARNT2	15	9915		KIAA0307
LPPR4	-0.931742	390.23	204.569	0.000146414	LPPR4	1	9890		KIAA0455	PRG1	PHP1	PRG-1	RP4-788L13.1
MOXD1	-0.926719	600.819	316.063	3.30137e-12	MOXD1	6	26002		MOX	dJ248E1.1	PRO5780	DKFZP564G202
FAM83D	-0.926688	885.6	465.883	1.83253e-33	FAM83D	20	81610		C20orf129	FLJ38341	dJ616B8.3
HIST1H4C	-0.918532	17720.8	9375.14	1.47308e-19	HIST1H4C	6	8364		H4FG	dJ221C16.1	H4/g
LDB2	-0.917787	1911.16	1011.61	1.43084e-25	LDB2	4	9079		LDB1	CLIM1
ASPM	-0.913926	1731.25	918.84	1.22286e-24	ASPM	1	259266		ASP	FLJ10517	FLJ43117	FLJ10549	Calmbp1	MCPH5	DKFZp686N06184
PBK	-0.912899	982.744	521.952	0.000130312	PBK	8	55872		Nori-3	SPK	FLJ14385	TOPK
CCNF	-0.910899	961.852	511.565	2.3156e-09	CCNF	16	899		FBX1	FBXO1
FAM129A	-0.910157	582.58	310.007	2.8812e-27	FAM129A	1	116496		NIBAN	FLJ38228	C1orf24
TOP2A	-0.908533	3106.17	1654.74	1.64414e-18	TOP2A	17	7153		TOP2	TP2A
C6orf173	-0.900689	2050.72	1098.43	1.09742e-07	C6ORF173	6	387103		DKFZp686L1553	CUG2
ADORA2B	-0.895465	316.084	169.918	7.82548e-11	ADORA2B	17	136		ADORA2
FAM64A	-0.893877	961.772	517.593	5.77098e-21	FAM64A	17	54478		FLJ10491	FLJ10156
NDN	-0.892297	335.437	180.719	5.62648e-20	NDN	15	4692		HsT16328
PTTG3P	-0.892292	3418.11	1841.53	0.00430287	PTTG3P	8	26255		rcPTTG1
CHST15	-0.889115	301.844	162.98	5.78848e-07	CHST15	10	51363		DKFZp781H1369	KIAA0598	BRAG	RP11-47G11.1	MGC34346
FBXO5	-0.888669	893.509	482.595	1.33749e-16	FBXO5	6	26271		Fbxo31	FBX5	EMI1
CDC45L	-0.8841	852.067	461.671	1.63312e-25	CDC45L	22	8318		CDC45L2	CDC45	PORC-PI-1
CDCA5	-0.879519	1775.59	965.119	3.88607e-06	CDCA5	11	113130		MGC16386
WWC1	-0.876899	295.486	160.903	1.60808e-17	WWC1	5	23286		FLJ10865	KIAA0869	KIBRA	FLJ23369
PRDM8	-0.868772	1689.48	925.183	5.23894e-06	PRDM8	4	56978		PFM5
LSM2	-0.860464	2528.83	1392.82	8.18891e-05	LSM2	6	57819		G7b	snRNP	C6orf28	YBL026W
LRIG1	-0.857934	790.001	435.877	5.83187e-10	LRIG1	3	26018		LIG-1	LIG1	DKFZP586O1624
NEK2	-0.849842	1024.5	568.44	1.0464e-11	NEK2	1	4751		NLK1	NEK2A	HsPK 21	HsPK21
NETO2	-0.847067	709.823	394.601	4.27455e-27	NETO2	16	81831		FLJ14724	FLJ10430	NEOT2	FLJ90456
GAS2L3	-0.846979	292.654	162.7	6.103e-14	GAS2L3	12	283431
UHRF1	-0.845183	1643.83	915.022	1.89043e-09	UHRF1	19	29128		Np95	hNP95	MGC138707	ICBP90	RNF106	FLJ21925
NRP1	-0.844237	786.312	437.98	0.000746389	NRP1	10	8829		DKFZp781F1414	VEGF165R	NRP	DKFZp686A03134	CD304
CKAP2L	-0.842819	907.155	505.787	1.17301e-12	CKAP2L	2	150468		MGC39683	FLJ40629
ANLN	-0.836193	1607.81	900.564	6.34653e-17	ANLN	7	54443		DKFZp779A055	Scraps	scra	ANILLIN
POLA1	-0.82968	338.579	190.503	1.12078e-13	POLA1	X	5422		DKFZp686K1672	POLA
C14orf106	-0.8286	580.397	326.807	1.02529e-17	C14ORF106	14	55320		KIAA1903	HSA242977	FLJ11186	MIS18BP1
EZH2	-0.825136	337.344	190.407	3.0068e-09	EZH2	7	2146		EZH1	ENX-1	MGC9169	KMT6
HMGN2	-0.821139	3070.97	1738.15	1.51221e-14	HMGN2	1	3151		HMG17	MGC5629	MGC88718
AURKB	-0.820133	770.815	436.582	3.35197e-07	AURKB	17	9212		ARK2	STK5	AurB	IPL1	AIM1	AIK2	STK12	AIM-1
KIF2C	-0.820045	551.215	312.222	4.4623e-18	KIF2C	1	11004		KNSL6	MCAK
TMEM97	-0.815719	1095.64	622.463	1.82401e-27	TMEM97	17	27346		MAC30
CDC20	-0.815479	5016.95	2850.73	1.16535e-05	CDC20	1	991		CDC20A	bA276H19.3	MGC102824	p55CDC
CDKN3	-0.812525	1338.34	762.03	2.94693e-06	CDKN3	14	1033		CDI1	KAP	MGC70625	FLJ25787	CIP2	KAP1
RNY4	-0.811625	379.802	216.388	1.73435e-18	RNY4	7	6086		Y4	HY4
UBE2C	-0.808161	1675.32	956.79	8.00576e-05	UBE2C	20	11065		UBCH10	dJ447F3.2
KIFC1	-0.806185	538.714	308.086	8.85202e-09	KIFC1	6	3833		HSET	MKLP2	RAB6-KIFL	KNSL2	MGC1202	MGC149736	MGC149737
UBE2T	-0.805045	1109.84	635.208	4.47251e-08	UBE2T	1	29089		HSPC150	PIG50
SMC4	-0.803344	758.148	434.433	9.78244e-10	SMC4	3	10051		SMC4L1	CAPC	hCAP-C
GPSM2	-0.803099	483.73	277.234	2.47583e-21	GPSM2	1	29899		Pins	LGN
CCNA2	-0.802056	1772.69	1016.7	0.00064601	CCNA2	4	890		CCNA	CCN1
RACGAP1	-0.799291	776.05	445.943	8.62688e-13	RACGAP1	12	29127		HsCYK-4	MgcRacGAP	ID-GAP
C3orf59	-0.798309	770.577	443.099	6.43672e-24	C3ORF59	3	151963
NCAPD2	-0.79506	1223.33	705.027	1.42173e-10	NCAPD2	12	9918		hCAP-D2	KIAA0159	CAP-D2	CNAP1
IL8	-0.794877	465.622	268.381	0.00790974	IL8	4	3576		GCP-1	MDNCF	NAP1	CXCL8	AMCF-I	TSG-1	LYNAP	NAP-1	MONAP	GCP1	SCYB8	LUCT	3-10C	b-ENAP	NAF
BUB1	-0.789438	759.352	439.338	6.46609e-07	BUB1	2	699		hBUB1	BUB1L	BUB1A
ARHGEF2	-0.789435	2348.06	1358.52	3.22651e-27	ARHGEF2	1	9181		P40	GEF	LFP40	DKFZp547L106	GEF-H1	DKFZp547P1516	GEFH1	KIAA0651
TIMELESS	-0.788407	732.543	424.13	5.63157e-24	TIMELESS	12	8914		TIM	FLJ12640	TIM1	FLJ20714	hTIM
TPX2	-0.786733	979.261	567.634	1.03793e-05	TPX2	20	22974		GD:C20orf1	HCTP4	C20orf1	FLS353	DIL-2	HCA519	DIL2	p100	REPP86	C20orf2
MCM3	-0.786277	1706.44	989.46	7.2144e-19	MCM3	6	4172		RLFB	HCC5	P1-MCM3	MGC1157	P1.h
MYH10	-0.785746	3064.82	1777.75	3.68655e-27	MYH10	17	4628		NMMHCB	MGC134914	MGC134913
HSPA12A	-0.785662	812.658	471.412	2.14146e-24	HSPA12A	10	259217		KIAA0417	FLJ13874
MELK	-0.78024	1330.08	774.467	1.23409e-23	MELK	9	9833		KIAA0175	HPK38
CDC25B	-0.771991	1632.28	955.875	9.99934e-22	CDC25B	20	994
CDCA3	-0.77131	926.45	542.794	3.71969e-20	CDCA3	12	83461		TOME-1	GRCC8	MGC2577
CCNB2	-0.770407	1732.05	1015.41	7.47449e-06	CCNB2	15	9133		HsT17299
KIF14	-0.768907	572.743	336.121	3.16436e-21	KIF14	1	9928		KIAA0042	MGC142302
SERPINH1	-0.766827	3330.66	1957.46	0.0176222	SERPINH1	11	871		RA-A47	AsTP3	PIG14	gp46	CBP1	PPROM	HSP47	SERPINH2	CBP2
MCM7	-0.766144	1463.38	860.446	1.36498e-11	MCM7	7	4176		MCM2	CDC47	P1.1-MCM3	P1CDC47	CDABP0042	P85MCM	PNAS-146
KIF15	-0.76434	351.425	206.892	1.88742e-14	KIF15	3	56992		NY-BR-62	FLJ25667	HKLP2	KNSL7
TRMT5	-0.763831	6112.46	3599.81	1.63898e-19	TRMT5	14	57570		TRM5	KIAA1393	MGC111453
CENPN	-0.763365	1175.28	692.384	2.00427e-09	CENPN	16	55839		FLJ22660	C16orf60	CENP-N	FLJ13607	BM039
NFE2L3	-0.760706	885.089	522.386	3.94058e-07	NFE2L3	7	9603		NRF3
NCAPG	-0.758462	1398.95	826.957	1.3926e-24	NCAPG	4	64151		NY-MEL-3	FLJ12450	HCAP-G	MGC126525	CHCG	CAPG
EVL	-0.75763	1100.19	650.725	5.72227e-24	EVL	14	51466		RNB6
CCDC109B	-0.756085	1058.72	626.871	8.3137e-23	CCDC109B	4	55013		FLJ20647
TROAP	-0.755561	497.861	294.891	2.17766e-06	TROAP	12	10024		TASTIN
SUV39H1	-0.754118	768.372	455.574	1.84172e-21	SUV39H1	X	6839		SUV39H	KMT1A	MG44
GBP2	-0.749405	229.586	136.569	1.77082e-06	GBP2	1	2634
SHROOM2	-0.747034	276.487	164.738	2.14852e-06	SHROOM2	X	357		APXL	DKFZp781J074	FLJ39277	HSAPXL
SPC24	-0.746641	706.594	421.123	0.00140611	SPC24	19	147841		SPBC24	FLJ90806
PRSS12	-0.746175	345.255	205.835	3.60181e-15	PRSS12	4	8492		MRT1	MOTOPSIN	MGC12722	BSSP-3	BSSP3
TNFAIP8L1	-0.745133	537.645	320.766	5.22862e-11	TNFAIP8L1	19	126282		MGC17791
C9orf140	-0.744108	301.858	180.22	1.00381e-12	C9ORF140	9	89958
H2AFY2	-0.744005	699.352	417.569	1.18352e-07	H2AFY2	10	55506		macroH2A2
H2AFZ	-0.741194	15031.6	8992.54	4.81762e-21	H2AFZ	4	3015		H2A/z	H2AZ	H2A.z	MGC117173
VAT1L	-0.739563	309.34	185.27	8.05196e-12	VAT1L	16	57687
CENPJ	-0.738213	432.125	259.051	1.41509e-16	CENPJ	13	55835		MGC131581	LAP	LIP1	MCPH6	BM032	MGC142222	MGC131582	CPAP	MGC142224
FANCG	-0.735041	552.572	331.986	1.92619e-13	FANCG	9	2189		XRCC9	FAG
C1orf24	-0.733959	549.453	330.36	7.29585e-05	C1ORF24	1	116496		NIBAN
KIAA0528	-0.733699	580.898	349.329	1.36322e-19	KIAA0528	12	9847		DKFZp779N2044
SYTL2	-0.732948	415.728	250.132	5.22223e-08	SYTL2	11	54843		MGC102768	CHR11SYT	SGA72M	KIAA1597	SLP2
MIR886	-0.732947	299.114	179.969	8.50307e-11	MIR886		100126299
POLE2	-0.730867	443.633	267.307	1.19277e-13	POLE2	14	5427		DPE2
WDR51A	-0.730715	1027.75	619.33	7.17556e-06	WDR51A	3	25886		MGC131902	DKFZP434C245
TWIST1	-0.730342	594.967	358.623	9.34065e-14	TWIST1	7	7291		TWIST	ACS3	BPES2	SCS	BPES3
HJURP	-0.729771	668.278	402.972	2.36612e-16	HJURP	2	55355		URLC9	FAKTS	hFLEG1	DKFZp762E1312
DTL	-0.72747	413.904	249.982	1.76654e-05	DTL	1	51514		RAMP	DCAF2	CDT2	L2DTL
DCHS1	-0.727281	250.822	151.507	1.99147e-09	DCHS1	11	8642		CDH25	KIAA1773	PCDH16	FLJ11790	FIB1
RFC4	-0.724553	799.013	483.55	5.52364e-11	RFC4	3	5984		A1	RFC37	MGC27291
GINS3	-0.722762	315.243	191.017	1.85374e-08	GINS3	16	64785		FLJ13912	PSF3
RBM7	-0.722578	449.447	272.371	7.52491e-10	RBM7	11	10179		FLJ11153
KIF4A	-0.721656	398.691	241.767	1.83657e-08	KIF4A	X	24137		HSA271784	KIF4	FLJ12655	FLJ12530	KIF4-G1	FLJ20631	FLJ14204
PPIH	-0.720825	994.911	603.663	5.22682e-07	PPIH	1	10465		CYPH	CYP-20	USA-CYP	MGC5016	SnuCyp-20
PRKCA	-0.719904	1537.02	933.182	1.91835e-22	PRKCA	17	5578		MGC129901	MGC129900	PRKACA	PKCA	AAG6	PKC-alpha
ZFP36L2	-0.717616	436.448	265.405	2.16393e-14	ZFP36L2	2	678		ERF2	ERF-2	TIS11D	RNF162C	BRF2
PRIM1	-0.71758	411.13	250.015	2.75828e-07	PRIM1	12	5557		MGC12308	p49
PPP1R14A	-0.715382	358.055	218.071	5.57934e-06	PPP1R14A	19	94274		CPI-17	CPI17	PPP1INL
TRIP13	-0.714205	1560.84	951.396	6.87976e-06	TRIP13	5	9319		16E1BP
CDT1	-0.710355	405.537	247.852	2.62058e-10	CDT1	16	81620		DUP	RIS2
C13orf34	-0.709857	392.521	239.98	1.34717e-07	C13ORF34	13	79866		BORA	RP11-342J4.2	FLJ22624
ARHGDIB	-0.709082	458.049	280.193	1.36207e-16	ARHGDIB	12	397		Ly-GDI	RAP1GN1	GDIA2	D4	LYGDI	GDID4
C12orf48	-0.707518	558.888	342.247	2.43188e-12	C12ORF48	12	55010		FLJ20641
HBE1	-0.707024	279.401	171.156	1.92365e-08	HBE1	11	3046		HBE
MARCKS	-0.706718	7501.1	4596.02	8.92786e-13	MARCKS	6	4082		MACS	80K-L	PRKCSL	FLJ14368	MRACKS	PKCSL	FLJ90045
AURKA	-0.705859	2166.27	1328.09	1.91811e-14	AURKA	20	6790		STK15	STK7	AURA	AIK	BTAK	AURORA2	ARK1	MGC34538	STK6
PTN	-0.704697	352.552	216.316	1.35602e-06	PTN	7	5764		HBGF8	NEGF1	HBNF	HARP
PSRC1	-0.70342	395.55	242.913	1.20878e-07	PSRC1	1	84722		RP11-297O4.2	MGC1780	FP3214	DDA3
HYLS1	-0.702642	393.489	241.778	9.91764e-13	HYLS1	11	219844		FLJ32915	HLS
ZFHX4	-0.701552	273.55	168.209	5.93145e-11	ZFHX4	8	79776		ZHF4	ZFH4	ZFH-4	FLJ20980	FLJ16514
SERPINB2	-0.699826	1564.51	963.182	4.55928e-05	SERPINB2	18	5055		PAI	HsT1201	PLANH2	PAI-2	PAI2
TSKU	-0.699154	457.987	282.089	1.58571e-13	TSKU	11	25987		LRRC54	TSK	E2IG4
CDCA8	-0.697496	752.531	464.042	0.000578932	CDCA8	1	55143		FLJ12042	FLJ10468	BOR
HAS2	-0.695551	350.108	216.182	2.50957e-05	HAS2	8	3037		MGC126241	MGC126242
GSDMD	-0.694736	379.944	234.738	7.89216e-09	GSDMD	8	79792		FLJ12150	FKSG10	DF5L
NCAPG2	-0.694294	380.289	235.023	7.68581e-08	NCAPG2	7	54892		hCAP-G2	LUZP5	MTB	FLJ20311	CAP-G2
SNCAIP	-0.691287	645.341	399.661	1.5375e-15	SNCAIP	5	9627		MGC39814	SYPH1
PSIP1	-0.690427	361.613	224.081	2.08491e-08	PSIP1	9	11168		MGC74712	PAIP	LEDGF	p75	PSIP2	p52	DFS70
NNMT	-0.686417	447.697	278.197	0.00394652	NNMT	11	4837
CYB5R2	-0.681024	291.875	182.049	2.00598e-08	CYB5R2	11	51700		B5R.2
PTGER2	-0.679367	466.403	291.24	5.61088e-12	PTGER2	14	5732		EP2
GNPDA1	-0.679068	1548.94	967.421	3.61729e-11	GNPDA1	5	10007		KIAA0060	HLN	GNPDA	GPI	GNPI
CEP55	-0.677018	1616.63	1011.13	5.54462e-11	CEP55	10	55165		URCC6	C10orf3	FLJ10540
PCOLCE	-0.674424	2250.01	1409.82	5.23861e-05	PCOLCE	7	5118		PCPE
RAD51AP1	-0.67416	646.641	405.248	0.000585235	RAD51AP1	12	10635		PIR51
C13orf3	-0.670714	351.58	220.861	1.06296e-07	C13ORF3	13	221150		MGC4832	RAMA1
WNK4	-0.670616	370.858	232.987	1.08169e-10	WNK4	17	65266		PRKWNK4	PHA2B
NUP107	-0.668123	912.114	574.016	1.05471e-10	NUP107	12	57122		NUP84
TRIM55	-0.665648	350.739	221.108	1.02958e-06	TRIM55	8	84675		MURF-2	RNF29
PRC1	-0.664151	3703.46	2337.11	8.61749e-20	PRC1	15	9055		MGC1671	ASE1	MGC3669
TIA1	-0.660353	562.376	355.829	7.53776e-09	TIA1	2	7072
MCM2	-0.654713	440.421	279.757	2.29709e-12	MCM2	3	4171		KIAA0030	D3S3194	MGC10606	CCNL1	BM28	MITOTIN	CDCL1	cdc19
VRK1	-0.654627	452.259	287.293	5.78467e-07	VRK1	14	7443		MGC142070	MGC138280	MGC117401
S1PR3	-0.654359	426.752	271.14	8.00191e-14	S1PR3	9	1903		FLJ37523	S1PR3	EDG-3	MGC71696	S1P3	LPB3
SEPHS1	-0.653509	762.182	484.544	3.01944e-05	SEPHS1	10	22929		MGC4980	SELD	SPS	SPS1
GTSE1	-0.653314	398.5	253.373	3.00736e-13	GTSE1	22	51512		B99
RFWD3	-0.652569	810.784	515.778	9.5513e-06	RFWD3	16	55159		FLJ10520	RNF201
MCM10	-0.652477	379.368	241.349	9.19179e-09	MCM10	10	55388		PRO2249	CNA43	MGC126776
RAD54L	-0.651288	302.594	192.665	7.82189e-11	RAD54L	1	8438		HR54	hRAD54	RAD54A	hHR54
RGS17	-0.651251	264.43	168.37	4.93371e-05	RGS17	6	26575		RGS-17	hRGS17	RGSZ2
RELN	-0.647553	542.394	346.244	2.21347e-06	RELN	7	5649		RL
CHAF1B	-0.647036	395.141	252.333	2.74625e-06	CHAF1B	21	8208		CAF1P60	MPP7	MPHOSPH7	CAF-IP60	CAF1A	CAF1	CAF-1
COL1A2	-0.643686	15233.3	9750.45	2.16529e-07	COL1A2	7	1278		OI4
FEN1	-0.643224	1125.87	720.869	0.000521267	FEN1	11	2237		RAD2	FEN-1	MF1
OIP5	-0.643026	465.582	298.144	2.87306e-12	OIP5	15	11339		LINT-25	5730547N13Rik	MIS18beta
MND1	-0.641896	311.575	199.679	8.16291e-11	MND1	4	84057		GAJ
CCDC15	-0.641338	305.723	196.005	1.20494e-10	CCDC15	11	80071		FLJ13215
BNC2	-0.640504	401.969	257.858	4.91753e-08	BNC2	9	54796		DKFZp686A01127	FLJ34928	BSN2	FLJ20043
RAB8B	-0.638707	904.648	581.045	1.90834e-06	RAB8B	15	51762		FLJ38125
SNORA67	-0.638482	584.744	375.633	9.33395e-06	SNORA67	17	26781		RNU67	U67
CDC25C	-0.638047	270.735	173.97	1.55815e-08	CDC25C	5	995		CDC25
RFC5	-0.633191	356.383	229.778	2.87237e-05	RFC5	12	5985		MGC1155	RFC36
LOC201725	-0.629789	392.276	253.517	0.000145271	LOC201725	4	201725
KDELC2	-0.629252	1560.36	1008.79	2.23924e-17	KDELC2	11	143888		MGC33424
FAM46B	-0.628943	264.922	171.312	8.45825e-09	FAM46B	1	115572		MGC16491	MGC20845	RP11-344H11.8
SIX1	-0.628837	265.029	171.394	0.000273106	SIX1	14	6495		BOS3	TIP39	DFNA23
SFRS10	-0.627309	2026.12	1311.67	1.78913e-06	SFRS10	3	6434		DKFZp686F18120	TRAN2B	TRA2B	Htra2-beta	TRA2-BETA	SRFS10
MDK	-0.627107	823.41	533.136	0.000136198	MDK	11	4192		FLJ27379	MK	NEGF2
CENPE	-0.626462	796.242	515.776	1.93202e-12	CENPE	4	1062		KIF10
CCDC58	-0.626087	215.591	139.688	5.2555e-07	CCDC58	3	131076		FLJ33273
KIF11	-0.622033	814.339	529.12	2.86556e-08	KIF11	10	3832		KNSL1	EG5	HKSP	TRIP5
GABRB1	-0.621752	402.157	261.354	3.38607e-08	GABRB1	4	2560
C5orf13	-0.620865	1272.47	827.461	1.2487e-09	C5ORF13	5	9315		PTZ17	D4S114	PRO1873	P311
PLK1	-0.62059	349.876	227.561	7.82189e-11	PLK1	16	5347		PLK	STPK13
CHEK1	-0.620235	546.403	355.471	3.78557e-13	CHEK1	11	1111		CHK1
RPL39L	-0.619477	1332.98	867.644	1.21005e-10	RPL39L	3	116832		RPL39L1
POLQ	-0.616312	407.324	265.712	4.81371e-09	POLQ	3	10721		DKFZp781A0112	PRO0327	POLH
ASF1B	-0.616294	414.865	270.635	1.07573e-10	ASF1B	19	55723		FLJ10604	CIA-II
APOBEC3B	-0.616065	345.861	225.656	4.94052e-06	APOBEC3B	22	9582		FLJ21201	APOBEC1L	ARCD3	DJ742C19.2	PHRBNL	ARP4	bK150C2.2
RNASEH2A	-0.615745	524.336	342.178	8.75784e-06	RNASEH2A	19	10535		RNHIA	AGS4	RNHL	RNASEHI	JUNB
SKA1	-0.615339	320.387	209.141	3.00972e-06	SKA1	18	220134		MGC10200	Ska1
MARCKSL1	-0.615117	2458.43	1605.06	4.2973e-11	MARCKSL1	1	65108		F52	MACMARCKS	MLP	MLP1	MRP
MCM4	-0.614981	718.433	469.093	1.20759e-11	MCM4	8	4173		P1-CDC21	CDC54	MGC33310	CDC21	hCdc21
NAV2	-0.614334	444.178	290.151	8.21074e-07	NAV2	11	89797		STEERIN2	HELAD1	RAINB1	FLJ10633	FLJ23707	FLJ11030	POMFIL2	KIAA1419
RAMP1	-0.613451	224.182	146.532	1.7569e-05	RAMP1	2	10267
NUP37	-0.613017	1485.67	971.372	4.07353e-07	NUP37	12	79023		MGC5585	p37	FLJ22618
C21orf45	-0.612512	269.064	175.983	0.00102977	C21ORF45	21	54069		B28	C21orf46	MIS18alpha	FASP1
SSRP1	-0.612394	418.055	273.454	0.00141318	SSRP1	11	6749		FACT	T160	FACT80
C18orf54	-0.610347	256.528	168.036	3.45194e-07	C18ORF54	18	162681		MGC33382
RCOR2	-0.609998	207.686	136.075	1.1285e-06	RCOR2	11	283248
ALDH7A1	-0.609988	1063.04	696.503	8.10239e-16	ALDH7A1	5	501		ATQ1	PDE	EPD
TNC	-0.608994	1256.9	824.091	3.71051e-09	TNC	9	3371		HXB	TN
CDCA1	-0.608971	249.534	163.611	2.02202e-06	CDCA1	1	83540		NUF2R
TK1	-0.607307	1435.33	942.179	3.93449e-16	TK1		7083		TK2
MLF1IP	-0.606578	300.535	197.377	7.89216e-09	MLF1IP	4	79682		CENPU	KLIP1	FLJ23468	CENP-50	CENP50	PBIP1	CENP-U(50)	CENP-U
NTF3	-0.606405	725.883	476.783	5.76953e-07	NTF3	12	4908		HDNF	NGF-2	NT3	NGF2	MGC129711
PRR11	-0.605242	534.235	351.185	1.28647e-05	PRR11	17	55771		FLJ11029
DDX6	-0.604704	272.6	179.263	1.03858e-08	DDX6	11	1656		P54	HLR2	FLJ36338	RCK
CENPM	-0.604633	497.673	327.289	6.39586e-08	CENPM	22	79019		C22orf18	bK250D10.2	PANE1	MGC861	CENP-M
ARL6IP1	-0.603633	2401.74	1580.57	1.74037e-07	ARL6IP1	16	23204		ARMER	AIP1	KIAA0069	ARL6IP
HNRNPA0	-0.603061	1630.74	1073.61	0.00493588	HNRNPA0	5	10949		hnRNPA0
C1orf41	-0.602883	1280.37	843.04	0.000103169	C1ORF41	1	51668		HSPCO34	PP25
SUZ12	-0.601689	2862.67	1886.45	3.19013e-08	SUZ12	17	23512		CHET9	KIAA0160	JJAZ1
SMARCC1	-0.601438	1260.48	830.78	1.32567e-09	SMARCC1	3	6599		BAF155	CRACC1	SWI3	Rsc8	SRG3
PRPS2	-0.600525	489.808	323.035	1.03719e-10	PRPS2	X	5634		PRS II	PRSII
CDC2	-0.59954	697.791	460.517	0.000244975	CDC2	10	983		DKFZp686L20222	CDK1	MGC111195	CDC28A
E2F2	-0.598739	254.478	168.04	1.98638e-06	E2F2	1	1870		E2F-2
TCF12	-0.596312	576.288	381.182	1.92039e-07	TCF12	15	6938		HEB	HsT17266	HTF4
PTTG1	-0.59604	4960.27	3281.55	0.00908996	PTTG1	5	9232		SECURIN	PTTG	MGC138276	EAP1	TUTR1	MGC126883	HPTTG
ERCC6L	-0.595751	261.507	173.039	9.54728e-07	ERCC6L	X	54821		FLJ20105	MGC131695	PICH
RAD21	-0.594423	1034.21	684.966	3.86263e-06	RAD21	8	5885		KIAA0078	hHR21	NXP1	FLJ40596	HRAD21	FLJ25655	SCC1	HR21	MCD1
FAM46C	-0.594344	1065.04	705.424	2.37428e-11	FAM46C	1	54855		FLJ20202
LASS6	-0.592987	312.247	207.01	7.89216e-09	LASS6	2	253782		CerS6	MGC129950	MGC129949
TYMS	-0.59111	3130.62	2078.2	9.49273e-16	TYMS	18	7298		TS	TSase	TMS	HsT422	MGC88736
SNRPG	-0.590574	8682.33	5765.75	6.80904e-15	SNRPG	2	6637		MGC117317	SMG
CENPQ	-0.590453	243.345	161.614	0.000675687	CENPQ	6	55166		FLJ10545	C6orf139	CENP-Q
CPS1	-0.589679	220.126	146.272	2.50024e-05	CPS1	2	1373
GMNN	-0.589658	756.518	502.706	3.14775e-12	GMNN	6	51053		Gem	RP3-369A17.3
KCNJ8	-0.589607	283.202	188.195	0.000200258	KCNJ8	12	3764		uKATP-1	KIR6.1
AMOT	-0.587784	344.257	229.056	2.72511e-06	AMOT	X	154796		KIAA1071
LOC728037	-0.586194	399.287	265.964	0.0103714	LOC728037	16	728037
CKS1B	-0.584922	2043.29	1362.23	8.10769e-05	CKS1B	1	1163		PNAS-18	PNAS-16	ckshs1	CKS1
HNRPA1L-2	-0.584846	1639.69	1093.21	0.000915089	HNRPA1L-2	19	664709
DEPDC1B	-0.584621	242.33	161.592	2.84908e-05	DEPDC1B	5	55789		XTP1	FLJ11252	BRCC3
COL6A1	-0.583707	4995.67	3333.34	0.000283709	COL6A1	21	1291		OPLL
ITGB3BP	-0.583231	338.964	226.248	6.82892e-05	ITGB3BP	1	23421		HSU37139	CENPR	NRIF3	TAP20	CENP-R
MID1	-0.583009	301.63	201.359	4.03773e-09	MID1	X	4281		RNF59	OGS1	TRIM18	FXY	OS	XPRF	GBBB1	OSX	BBBG1	ZNFXY
CHD1	-0.582857	575.133	383.982	0.000194251	CHD1	5	1105		DKFZp686E2337
OXTR	-0.582683	4136.37	2761.94	1.58519e-11	OXTR	3	5021		OT-R
RNASEH2B	-0.581998	472.287	315.506	4.18958e-06	RNASEH2B	13	79621		DLEU8	AGS2	FLJ11712
EPHB4	-0.581042	420.94	281.39	3.93034e-06	EPHB4	7	2050		TYRO11	MYK1	HTK
EXO1	-0.580513	229.445	153.436	2.50329e-07	EXO1	1	9156		HEX1	hExoI
SV2A	-0.580073	312.786	209.232	4.11778e-09	SV2A	1	9900		SV2	KIAA0736
C1orf112	-0.579057	305.365	204.412	2.10277e-05	C1ORF112	1	55732		FLJ10706	MGC130018	MGC130019	FLJ13470	RP1-97P20.1
VEZF1	-0.577826	1509	1010.99	1.02391e-14	VEZF1	17	7716		DB1	ZNF161
MYBL1	-0.577533	588.985	394.684	0.00476541	MYBL1	8	4603		MGC120061	MGC120059	AMYB	A-MYB
PARP1	-0.576047	2273.35	1524.96	6.84215e-15	PARP1	1	142		PARP-1	PARP	pADPRT-1	ADPRT1	ADPRT	PPOL
TNFRSF1B	-0.574965	211.917	142.26	3.35268e-06	TNFRSF1B	1	7133		TNF-R-II	TNFR80	TNF-R75	p75	CD120b	TBPII	TNFBR	p75TNFR	TNFR2
CDCA2	-0.574938	333.702	224.019	1.24085e-07	CDCA2	8	157313		MGC129907	MGC129906	Repo-Man	FLJ25804
TGFBR3	-0.574824	547.065	367.282	2.52959e-05	TGFBR3	1	7049		BGCAN	betaglycan
DENND2A	-0.574749	348.563	234.026	0.000574795	DENND2A	7	27147		KIAA1277	FAM31D
NGF	-0.573695	458.422	308.011	4.69899e-08	NGF	1	4803		NGF	MGC161428	HSAN5	Beta-NGF	MGC161426	NGFB
MMD	-0.573691	525.164	352.855	5.34981e-12	MMD	17	23531		PAQR11	MMA
SHPK	-0.573334	701.55	471.485	0.00024604	SHPK	17	23729		CARKL	FLJ32478	SHK
SPAG5	-0.572426	274.51	184.604	0.000833886	SPAG5	17	10615		hMAP126	DEEPEST	MAP126
TRIM59	-0.572177	203.645	136.972	6.92632e-06	TRIM59	3	286827		TRIM57	MGC26631	RNF104	TSBF1	MGC129860	MGC129861	MRF1
CDKN1B	-0.571783	450.677	303.209	1.23137e-05	CDKN1B	12	1027		P27KIP1	KIP1	MEN1B	MEN4	CDKN4
RRM1	-0.570603	5544.26	3733.14	8.29444e-15	RRM1	11	6240		RR1	R1	RIR1
STIL	-0.567236	561.48	378.947	4.2769e-08	STIL	1	6491		SIL	DKFZp686O09161
ZNF462	-0.565516	363.991	245.954	2.25704e-05	ZNF462	9	58499		FLJ45904	RP11-508N12.1	KIAA1803	FLJ14960	Zfp462	DKFZp686B2325	DKFZP762N2316
POLA2	-0.564926	716.174	484.127	8.04954e-08	POLA2	11	23649		FLJ37250	FLJ21662
C17orf53	-0.563165	400.247	270.893	2.64712e-05	C17ORF53	17	78995		MGC3130	FLJ11594
TOP2B	-0.562935	1497.69	1013.82	2.9781e-11	TOP2B	3	7155		top2beta	TOPIIB
DOCK11	-0.562018	507.164	343.53	2.17843e-11	DOCK11	X	139818		ZIZ2	bB128O4.1	FLJ43653	FLJ32122
FRMD4A	-0.561176	516.66	350.166	2.26921e-07	FRMD4A	10	55691		KIAA1294	bA295P9.4	FRMD4	FLJ10210
SNORA28	-0.561052	216.709	146.887	4.10992e-06	SNORA28	14	677811		ACA28
NBPF10	-0.56099	4695.03	3182.46	0.00101438	NBPF10		440673		AG1	AB6
CDH4	-0.56075	338.656	229.591	0.000417509	CDH4	20	1002		MGC126700	RCAD	CAD4	FLJ40547	FLJ22202	MGC138355
HNRNPA3	-0.560137	420.367	285.109	8.11883e-05	HNRNPA3	2	220988		2610510D13Rik	MGC142030	D10S102	MGC138232	FBRNP
SIP1	-0.559533	288.899	196.024	4.45099e-07	SIP1	14	8487		GEMIN2	SIP1-delta
TACC3	-0.559348	916.54	621.973	0.0025245	TACC3	4	10460		MGC133242	ERIC1	MGC117382
PARP14	-0.558771	240.713	163.415	2.19404e-06	PARP14	3	54625		KIAA1268	BAL2
MPP4	-0.558408	203.423	138.134	1.18368e-05	MPP4	2	58538		DLG6	ALS2CR5
SALL2	-0.55837	337.063	228.889	2.37352e-07	SALL2	14	6297		FLJ10414	KIAA0360	HSAL2	ZNF795	p150(Sal2)
PAK1IP1	-0.558304	876.73	595.387	3.00724e-05	PAK1IP1	6	55003		hPIP1	RP11-421M1.5	PIP1	MAK11	FLJ20624	bA421M1.5	WDR84
KNTC1	-0.55619	506.38	344.387	0.000604334	KNTC1	12	9735		FLJ36151	KIAA0166	ROD
ARAP3	-0.554852	508.407	346.087	0.000153285	ARAP3	5	64411		FLJ21065	ARAP3	DRAG1
FEM1C	-0.554225	754.813	514.045	0.0023093	FEM1C	5	56929		KIAA1785	FEM1A	EUROIMAGE686608	EUROIMAGE783647
UCK2	-0.553377	593.812	404.637	1.30282e-09	UCK2	1	7371		UK	TSA903	UMPK
CENPK	-0.552704	511.68	348.833	1.41295e-06	CENPK	5	64105		AF5alpha	P33	FKSG14	CENP-K	Solt
C16orf59	-0.552468	301.599	205.647	3.91761e-08	C16ORF59	16	80178		FLJ13909
CTSK	-0.552168	371.233	253.179	1.21938e-05	CTSK	1	1513		CTSO2	CTSO	CTSO1	PKND	CTS02	PYCD	MGC23107
LBR	-0.549703	224.718	153.519	7.94847e-07	LBR	1	3930		PRO0650	PHA	MGC9041	LMN2R	DHCR14B
HMGB3	-0.549342	352.058	240.573	1.25827e-05	HMGB3	X	3149		MGC90319	HMG4	HMG2A
MDC1	-0.548752	699.748	478.356	1.50014e-09	MDC1	6	9656		NFBD1	DKFZp781A0122	KIAA0170
BLMH	-0.54813	373.451	255.406	3.4479e-06	BLMH	17	642		BMH	BH
RICS	-0.547916	247.851	169.532	1.31104e-06	RICS	11	9743		KIAA0712	MGC1892	GRIT	GC-GAP	p250GAP	p200RhoGAP
IDH2	-0.547727	566.453	387.509	0.0005479	IDH2	15	3418		ICD-M	IDHM	IDH	IDP	mNADP-IDH
PRPF19	-0.547681	627.769	429.469	6.29843e-08	PRPF19	11	27339		NMP200	PRP19	hPSO4	UBOX4	SNEV	PSO4
AUTS2	-0.546485	617.315	422.667	3.32013e-05	AUTS2	7	26053		MGC13140	KIAA0442
ERH	-0.545909	2194.09	1502.86	0.00683526	ERH	14	2079		FLJ27340	DROER
SIX4	-0.545545	576.702	395.117	7.7324e-11	SIX4	14	51804		MGC119452	MGC119453	MGC119450	AREC3
STMN3	-0.543518	1241.07	851.495	2.4725e-08	STMN3	20	50861		SCLIP
SPON2	-0.542107	279.491	191.946	0.00133027	SPON2	4	10417		DIL1	Mindin	DIL-1	M-spondin
CDC25A	-0.536915	250.923	172.947	0.000187027	CDC25A	3	993		CDC25A2
C3orf26	-0.536643	794.237	547.526	7.98012e-07	C3ORF26	3	84319		MGC4308
AOF2	-0.535881	1026.21	707.814	2.52511e-12	AOF2	1	23028		KDM1	KIAA0601	LSD1	BHC110	RP1-184J9.1
EXOSC8	-0.535544	698.948	482.203	0.00547666	EXOSC8	13	11340		Rrp43p	EAP2	RRP43	RP11-421P11.3	CIP3	bA421P11.3	OIP2	p9
RASIP1	-0.53529	197.887	136.546	0.000284078	RASIP1	19	54922		RAIN	FLJ20401
LPHN2	-0.53525	238.793	164.776	5.28391e-06	LPHN2	1	23266		LEC1	CIRL2	CL2	LPHH1
ZNF395	-0.534605	241.726	166.875	5.21127e-05	ZNF395	8	55893		PRF1	DKFZp434K1210	PBF	PRF-1	HDBP2	Si-1-8-14
PFTK1	-0.534025	285.548	197.206	2.49781e-07	PFTK1	7	5218		KIAA0834	PFTAIRE1
GFPT2	-0.533927	214.235	147.966	5.3681e-05	GFPT2	5	9945		GFAT2	FLJ10380
DSCC1	-0.533438	328.142	226.715	1.97983e-07	DSCC1	8	79075		hDCC1	MGC5528	DCC1
LIG1	-0.533126	372.781	257.612	5.39124e-05	LIG1	19	3978		MGC130025	MGC117397
KHSRP	-0.531642	784.57	542.74	0.0146775	KHSRP	19	8570		FUBP2	MGC99676	KSRP	FBP2
TMEM166	-0.529235	1799.9	1247.19	5.48487e-09	TMEM166	2	84141		FLJ13391
S100A3	-0.529013	359.587	249.204	1.07985e-06	S100A3	1	6274		S100E
SNORA79	-0.527278	230.81	160.151	8.68391e-06	SNORA79	14	677845		ACA65
MTA2	-0.527216	914.822	634.788	1.05156e-08	MTA2	11	9219		MTA1L1	PID	DKFZp686F2281
PELI2	-0.526763	207.961	144.348	2.87466e-05	PELI2	14	57161
HMHA1	-0.526225	215.175	149.411	0.000343677	HMHA1	19	23526		KIAA0223	HA-1	HLA-HA1
STK32B	-0.525855	265.089	184.117	0.00155622	STK32B	4	55351		STK32	HSA250839	YANK2	STKG6
HIRIP3	-0.525735	452.648	314.412	0.000534616	HIRIP3	16	8479
TFAM	-0.524436	609.279	423.59	5.48028e-06	TFAM	10	7019		MtTF1	mtTFA	TCF6	TCF6L2
DBI	-0.524177	3871.88	2692.33	4.13812e-07	DBI	2	1622		MGC70414	ACBD1	ACBP
TKT	-0.523941	3687.73	2564.7	2.34421e-11	TKT	3	7086		TKT1	FLJ34765
UGCG	-0.523748	2077.29	1444.88	0.000261829	UGCG	9	7357		GCS
ASNS	-0.522886	496.864	345.806	0.0369299	ASNS	7	440		TS11
MXD3	-0.52219	240.306	167.329	1.05782e-05	MXD3	5	83463		MAD3	MGC2383
CKAP2	-0.522052	726.642	506.019	0.000123842	CKAP2	13	26586		TMAP	FLJ10749	DKFZp686L1238	LB1	se20-10
NUP85	-0.521809	954.294	664.664	4.59424e-08	NUP85	17	79902		Nup75	FLJ12549
NIF3L1	-0.52144	1431.47	997.273	2.82484e-08	NIF3L1	2	60491		CALS-7	MDS015	ALS2CR1
HNRPR	-0.521095	4433.65	3089.55	0.000132147	HNRPR	1	10236		hnRNP-R	FLJ25714	HNRNPR
C11orf82	-0.521038	524.471	365.488	1.07097e-05	C11ORF82	11	220042		FLJ38838	FLJ13936	FLJ25416
RAB38	-0.521024	318.145	221.708	0.00429441	RAB38	11	23682		NY-MEL-1	rrGTPbp
PYGL	-0.518784	1012.31	706.55	4.55683e-11	PYGL	14	5836
SMAD3	-0.51761	1230.4	859.469	0.000162532	SMAD3	15	4088		MADH3	JV15-2	HSPC193	MGC60396	Smad 3	HsT17436	DKFZp686J10186	DKFZP586N0721
TGIF2	-0.516679	291.106	203.477	4.90755e-07	TGIF2	20	60436
LOC143543	-0.516598	507.699	354.891	0.000483275	LOC143543	11	143543
AS3MT	-0.516324	205.815	143.896	0.000243581	AS3MT	10	57412		CYT19
SAP30	-0.516322	624.565	436.666	0.000133092	SAP30	4	8819
FBL	-0.516043	1956.5	1368.15	0.000342209	FBL	19	2091		RNU3IP1	FLRN	FIB
CYTH2	-0.515218	236.238	165.293	0.000155631	CYTH2	19	9266
UCHL5	-0.515119	604.705	423.133	0.000273106	UCHL5	1	51377		UCH37	CGI-70
COL6A3	-0.514969	8578.81	6003.52	1.8072e-09	COL6A3	2	1293		DKFZp686K04147	FLJ34702	DKFZp686D23123
SPC25	-0.514804	280.703	196.461	1.25166e-05	SPC25	2	57405		SPBC25	MGC22228	AD024
CFDP1	-0.513978	763.762	534.854	2.75435e-06	CFDP1	16	10428		SWC5	BCNT	p97	CP27	Yeti
BIRC5	-0.513909	875.072	612.832	1.60468e-07	BIRC5	17	332		API4	EPR-1
PRMT6	-0.512833	484.713	339.709	7.39307e-07	PRMT6	1	55170		FLJ10559	HRMT1L6
FTH1	-0.511518	1663.34	1166.8	0.000237475	FTH1	11	2495		MGC104426	FTHL6	PIG15	PLIF	FTH
KIF23	-0.51088	491.754	345.11	3.9843e-05	KIF23	15	9493		MKLP-1	CHO1	KNSL5	MKLP1
SNRPF	-0.510792	3916.61	2748.82	2.06806e-06	SNRPF	12	6636		SMF
UGDH	-0.510735	1613.47	1132.44	0.0260611	UGDH	4	7358		UDPGDH	UGD	UDP-GlcDH	GDH
ILF2	-0.510468	4158.14	2918.99	2.43815e-09	ILF2	1	3608		MGC8391	PRO3063	NF45
CDH11	-0.510022	2266.36	1591.47	6.40526e-06	CDH11	16	1009		CDHOB	CAD11	OB	OSF-4
HMOX1	-0.509663	279.103	196.038	3.9783e-06	HMOX1	22	3162		HO-1	bK286B10
H3F3B	-0.509243	1123.67	789.481	2.63844e-11	H3F3B	17	3021		H3F3A	H3.3B
NUP43	-0.509167	574.36	403.562	0.000813409	NUP43	6	348995		p42	FLJ13287	bA350J20.1
TTF2	-0.508732	507.528	356.711	8.09355e-05	TTF2	1	8458		HuF2
CCDC45	-0.508687	288.042	202.454	0.000402436	CCDC45	17	90799		DKFZp667E1824
SGOL1	-0.508427	289.179	203.29	2.86716e-06	SGOL1	3	151648		NY-BR-85	Sgo1
TFRC	-0.508034	3229.98	2271.26	5.39124e-05	TFRC	3	7037		TFR	TFR1	CD71	TRFR
ISOC1	-0.507849	505.988	355.846	1.81603e-09	ISOC1	5	51015		CGI-111
FBLN1	-0.507483	1045.28	735.299	0.00104002	FBLN1	22	2192		FBLN
LMNB2	-0.50684	2492.11	1753.85	1.54309e-08	LMNB2	19	84823		LMN2	LAMB2	MGC2721
SF3A2	-0.506716	1441.08	1014.26	1.19969e-09	SF3A2	19	8175		SF3a66	SAP62	PRPF11	PRP11
DEK	-0.50671	2388.94	1681.39	2.23885e-09	DEK	6	7913		D6S231E
C13orf27	-0.5066	1075.42	756.964	7.7219e-10	C13ORF27	13	93081
RBBP4	-0.506063	290.825	204.782	0.000118302	RBBP4	1	5928		RBAP48	NURF55
TEAD2	-0.506032	2057.01	1448.46	2.01345e-07	TEAD2	19	8463		ETF	TEF-4	TEF4
NEFH	-0.505651	209.396	147.487	5.70236e-05	NEFH	22	4744		NFH
CNTNAP1	-0.50544	1045.64	736.6	1.56909e-07	CNTNAP1	17	8506		P190	NRXN4	CNTNAP	CASPR
HNRPUL1	-0.505103	2277.89	1605.02	8.50947e-08	HNRPUL1	19	11100		E1BAP5	FLJ12944	E1B-AP5
CDC7	-0.504488	291.192	205.265	9.42149e-07	CDC7	1	8317		HsCDC7	MGC126237	CDC7L1	huCDC7	MGC126238	Hsk1	MGC117361
PPIL5	-0.504076	473.104	333.591	0.00145487	PPIL5	14	122769		MGC20689	4-1BBLRR	LRR-1
SF3B3	-0.503787	497.772	351.055	3.98036e-06	SF3B3	16	23450		SAP130	KIAA0017	RSE1	STAF130	SF3b130
NFKBIE	-0.503641	217.159	153.168	0.000941761	NFKBIE	6	4794		IKBE
SF3A3	-0.502497	1640.98	1158.34	6.2532e-09	SF3A3	1	10946		SAP61	PRPF9	SF3a60	PRP9
MAMLD1	-0.501704	424.401	299.742	2.17612e-08	MAMLD1	X	10046		CXorf6	F18	CG1
OAF	-0.501237	1307.37	923.658	4.19864e-05	OAF	11	220323		NS5ATP13TP2	MGC52117
HNRPC	-0.501153	1328.38	938.559	0.000233804	HNRPC	14	3183		MGC131677	MGC105117	MGC117353	C1	hnRNPC	C2	MGC104306	SNRPC	HNRNP
FKBP5	-0.500796	579.965	409.871	1.10585e-09	FKBP5	6	2289		FKBP54	P54	PPIase	Ptg-10	MGC111006	FKBP51
CEP152	-0.500591	285.243	201.615	4.02449e-06	CEP152	15	22995		KIAA0912
PFAS	-0.50006	753.005	532.433	2.50365e-10	PFAS	17	5198		FGAMS	PURL	KIAA0361	FGARAT
TSHZ1	-0.499904	291.191	205.917	1.10796e-05	TSHZ1	18	10194		TSH1	SDCCAG33	NY-CO-33
RBPMS2	-0.499255	295.964	209.386	1.01974e-06	RBPMS2	15	348093
NOTCH1	-0.497312	437.988	310.282	1.29648e-05	NOTCH1	9	4851		TAN1	hN1
HNRNPH3	-0.497061	547.154	387.686	0.00214161	HNRNPH3	10	3189
NARG1	-0.496791	406.464	288.053	0.000202985	NARG1	4	80155		Ga19	TBDN100	NAT1	NATH
FOXRED2	-0.495735	238.41	169.08	1.11784e-06	FOXRED2	22	80020		FLJ33734	FLJ23322
CCDC23	-0.493049	1322.98	940.01	0.000425424	CCDC23	1	374969
GLCE	-0.491949	814.882	579.433	3.65343e-10	GLCE	15	26035		KIAA0836	HSEPI
FAM72D	-0.491819	218.455	155.349	0.000309709	FAM72D	1	728833		RP11-312O7.1	MGC57827	GCUD2
TRO	-0.4911	324.971	231.211	0.000527157	TRO	X	7216		KIAA1114	MAGE-d3	MAGED3
CENPV	-0.490283	819.631	583.483	5.11979e-07	CENPV	17	201161		3110013H01Rik	p30
MED20	-0.489886	1302.06	927.176	1.17412e-10	MED20	6	9477		PRO0213	MED20	DKFZp586D2223	TRFP	MGC29869
CDKN2AIP	-0.489566	438.65	312.424	4.56071e-08	CDKN2AIP	4	55602		FLJ20036	CARF
CSE1L	-0.488964	2505.5	1785.26	0.00792364	CSE1L	20	1434		CAS	MGC117283	XPO2	MGC130036	MGC130037	CSE1
SDPR	-0.488658	546.043	389.158	0.000821609	SDPR	2	8436		SDR	PS-p68
ZWILCH	-0.488608	615.798	438.887	0.000516835	ZWILCH	15	55055		FLJ10036	FLJ16343	KNTC1AP	MGC111034	hZwilch
HNRPA2B1	-0.488147	10709.8	7635.45	5.233e-11	HNRPA2B1	7	3181		RNPA2	HNRNPB1	HNRNPA2	HNRPB1	HNRPA2	SNRPB1
PCNA	-0.487828	1015.38	724.062	0.0011195	PCNA	20	5111		MGC8367
FBXL10	-0.487176	676.456	482.597	1.15442e-06	FBXL10	12	84678		CXXC2	Fbl10	JHDM1B	PCCX2
ALS2CR4	-0.484593	1186.13	847.725	5.47057e-05	ALS2CR4	2	65062		FLJ33282	DKFZp313L091
CENPO	-0.484529	222.346	158.917	0.00658682	CENPO	2	79172		MGC11266	CENP-O
ELF3	-0.48439	231.971	165.813	0.000241921	ELF3	1	1999		ESX	ESE-1	EPR-1	ERT
RBMX	-0.484155	1250.45	893.964	0.000260636	RBMX	X	27316		RBMXRT	HNRPG	hnRNP-G	RNMX	RBMXP1
SNORD36A	-0.483532	378.075	270.408	0.000595796	SNORD36A	9	26815		RNU36A	U36a
NUP62	-0.483505	2244.52	1605.36	8.24307e-06	NUP62	19	23636		FLJ43869	DKFZp547L134	MGC841	p62	SNDI	IBSN	FLJ20822
PDLIM3	-0.483384	208.901	149.427	0.0012423	PDLIM3	4	27295		DKFZp686L0362	ALP
BCL3	-0.481516	470.021	336.641	0.000232125	BCL3	19	602		D19S37	BCL4
ATP2B1	-0.481432	223.541	160.115	0.00564744	ATP2B1	12	490		PMCA1	PMCA1kb
NDC80	-0.481301	599.174	429.207	0.00133648	NDC80	18	10403		HEC	hsNDC80	TID3	KNTC2	HEC1
RPL36A	-0.481022	459.725	329.379	3.08249e-08	RPL36A	X	6173		RPL44	MGC72020	MIG6	L44L
H2AFX	-0.48094	755.445	541.284	6.76986e-05	H2AFX	11	3014		H2AX	H2A.X	H2A/X
LMNB1	-0.480751	255.15	182.842	0.0434979	LMNB1	5	4001		MGC111419	LMN	ADLD	LMNB	LMN2
GGCT	-0.47916	505.873	362.911	1.90186e-08	GGCT	7	79017		FLJ11717	MGC3077	CRF21
ECT2	-0.477883	953.451	684.607	0.00184984	ECT2	3	1894		FLJ10461	MGC138291
SACS	-0.477426	683.342	490.816	0.011107	SACS	13	26278		ARSACS	DKFZp686B15167
JUN	-0.475849	1765.16	1269.23	0.0152289	JUN	1	3725		AP1	c-Jun
DNMT1	-0.475372	5080.63	3654.4	1.89442e-10	DNMT1	19	1786		FLJ16293	DNMT	CXXC9	MCMT	MGC104992
WDR67	-0.475288	269.138	193.597	1.21938e-05	WDR67	8	93594		Gm85	MGC126773	MGC104222	MGC138159	MGC21654
KIF20B	-0.475225	851.185	612.304	0.0185104	KIF20B	10	9585		DKFZp434P0810	DKFZp434B0435	MPP-1	KRMP1	MPP1
FBXO34	-0.474362	355.981	256.23	0.000212896	FBXO34	14	55030		DKFZp547C162	MGC126434	CGI-301	MGC126435	Fbx34	FLJ20725
PIM1	-0.473963	194.921	140.34	0.000384551	PIM1	6	5292		PIM
PTBP2	-0.473653	289.96	208.812	0.000664637	PTBP2	1	58155		PTBLP	nPTB	nPTB7	PTB	nPTB8	nPTB6	FLJ34897	MIBP	nPTB5	brPTB
HSPA5	-0.473317	1139.41	820.724	0.00182594	HSPA5	9	3309		BIP	FLJ26106	MIF2	GRP78
GPC6	-0.4731	377.243	271.772	1.04224e-05	GPC6	13	10082		MGC126288
FAM111A	-0.472918	729.586	525.671	1.57516e-05	FAM111A	11	63901		FLJ22794	KIAA1895	DKFZp686A06175
BCHE	-0.472913	188.359	135.714	0.0496139	BCHE	3	590		CHE1	E1
FADS1	-0.4724	773.487	557.502	7.36259e-05	FADS1	11	3992		FADSD5	FLJ38956	FADS6	BC269730_2	D5D	TU12	LLCDL1	FLJ90273
NOC3L	-0.471742	887.958	640.301	0.00132455	NOC3L	10	64318		FLJ12820	FAD24	AD24	C10orf117
RRM2	-0.471648	521.119	375.8	3.50177e-06	RRM2	2	6241		RR2M	R2
FANCB	-0.471444	249.482	179.937	6.93795e-05	FANCB	X	2187		FAAP95	FA2	FACB	FAB	FAAP90
ARHGAP19	-0.471045	488.143	352.167	1.05104e-06	ARHGAP19	10	84986		MGC138804	MGC138805	MGC14258	DKFZp313K217
MKLN1	-0.470651	959.777	692.612	9.26354e-06	MKLN1	7	4289		FLJ11162
OLFML3	-0.469837	534.581	385.992	4.95296e-08	OLFML3	1	56944		OLF44	HNOEL-iso
POSTN	-0.469235	185.544	134.027	0.0253433	POSTN	13	10631		MGC119511	periostin	RP11-412K4.1	PN	PDLPOSTN	OSF-2	MGC119510
XPO1	-0.469104	1980.01	1430.39	0.000240071	XPO1	2	7514		DKFZp686B1823	CRM1
SPIN4	-0.468597	288.54	208.518	0.000623839	SPIN4	X	139886		MGC133224	FLJ44984
NR2C2AP	-0.46816	334.633	241.901	9.6531e-06	NR2C2AP	19	126382		TRA16
TMEM43	-0.468019	2210.47	1598.08	5.05076e-10	TMEM43	3	79188		DKFZp586G1919	MGC3222
PM20D2	-0.467332	250.074	180.879	0.000688582	PM20D2	6	135293		bA63L7.3	ACY1L2
C1orf131	-0.466105	490.766	355.274	7.31989e-08	C1ORF131	1	128061		DKFZp547B1713
SPSB1	-0.466032	321.051	232.426	0.000419753	SPSB1	1	80176		SSB1	SSB-1
WDFY1	-0.465743	1394.44	1009.71	0.00560208	WDFY1	2	57590		FENS-1	ZFYVE17	WDF1
TPRKB	-0.464876	508.477	368.408	0.0135704	TPRKB	2	51002		CGI-121
CDK4	-0.464293	3418.91	2478.11	0.00065328	CDK4	12	1019		PSK-J3	CMM3	MGC14458
RFC3	-0.464281	254.501	184.47	0.00186415	RFC3	13	5983		RFC38	MGC5276
WDR57	-0.4642	659.365	477.956	0.0151547	WDR57	1	9410		SPF38	HPRP8BP	PRPF8BP	PRP8BP	SFP38	RP11-490K7.3
WEE1	-0.464159	475.335	344.567	0.000309709	WEE1	11	7465		WEE1hu	FLJ16446	DKFZp686I18166
SLC37A4	-0.463988	496.308	359.813	4.13443e-07	SLC37A4	11	2542		G6PT3	GSD1b	TRG19	G6PT2	GSD1d	GSD1c	MGC15729	G6PT1	PRO0685
KIAA1522	-0.463334	220.133	159.664	0.0287802	KIAA1522	1	57648
MAGOH	-0.461807	337.615	245.134	4.56514e-05	MAGOH	1	4116		MAGOHA
GLI3	-0.46156	212.537	154.344	0.00522678	GLI3	7	2737		PHS	PAP-A	PAPA1	GCPS	PAPB	PAPA	ACLS	PPDIV
PAICS	-0.461449	2340.38	1699.72	1.30879e-05	PAICS	4	10606		MGC1343	MGC5024	PAIS	AIRC	ADE2	DKFZp781N1372	ADE2H1
ANXA3	-0.461361	312.549	227.004	1.29416e-05	ANXA3	4	306		ANX3
PKN3	-0.461358	194.951	141.593	0.000601982	PKN3	9	29941		RP11-545E17.1
ANKRD35	-0.46107	348.199	252.948	0.000513613	ANKRD35	1	148741		MGC126667	FLJ25124	MGC126669
GREM1	-0.460849	6739.94	4896.96	0.00621157	GREM1	15	26585		DAND2	DRM	MGC126660	GREMLIN	PIG2	IHG-2	CKTSF1B1
LOC92659	-0.459896	278.339	202.363	1.47024e-05	LOC92659	17	92659
NT5DC2	-0.459214	1320.47	960.489	1.92023e-09	NT5DC2	3	64943		FLJ12442
ACSL3	-0.459197	700.81	509.763	2.19367e-06	ACSL3	2	2181		PRO2194	FACL3	ACS3
COL1A1	-0.458628	10968.2	7981.35	0.0452846	COL1A1	17	1277		OI4
SCARA3	-0.457862	866.287	630.712	2.57307e-06	SCARA3	8	51435		APC7	MSLR1	MSRL1	CSR	CSR1
G3BP1	-0.457833	724.087	527.193	0.00332393	G3BP1	5	10146		HDH-VIII	G3BP	MGC111040
MAT2A	-0.457818	3427.15	2495.26	0.000742203	MAT2A	2	4144		MATII	SAMS2	MATA2
CHSY1	-0.457366	2582.83	1881.11	4.02791e-07	CHSY1	15	22856		CSS1	KIAA0990
ZNF521	-0.456868	203.946	148.588	0.0208922	ZNF521	18	25925		MGC142182	DKFZp564D0764	MGC142208	Evi3	EHZF
FUS	-0.456581	274.263	199.858	0.00140888	FUS	16	2521		FUS1	FUS-CHOP	hnRNP-P2	TLS/CHOP	TLS	CHOP
BUB1B	-0.456488	325.298	237.064	0.00213206	BUB1B	15	701		Bub1A	hBUBR1	MAD3L	BUB1beta	SSK1	BUBR1
SMAD4	-0.456257	932.851	679.932	0.00187694	SMAD4	18	4089		DPC4	MADH4	JIP
WDR79	-0.456096	227.16	165.59	0.000517683	WDR79	17	55135		WRAP53	FLJ10385
UBA7	-0.455021	210.416	153.499	0.000329804	UBA7	3	7318		UBA7	UBE2	D8	MGC12713	UBA1B
PLK2	-0.454781	281.765	205.582	0.00824617	PLK2	5	10769		SNK
HADH	-0.454739	1055.54	770.164	4.67054e-07	HADH	4	3033		HHF4	HADH1	MGC8392	HADHSC	M/SCHAD	HAD	SCHAD
C10orf116	-0.454155	384.821	280.895	0.0220314	C10ORF116	10	10974		APM2
C6orf150	-0.453649	202.568	147.914	0.000500939	C6ORF150	6	115004		MGC142168	MGC142166	MGC131892
GSTO2	-0.453618	194.652	142.137	0.00072804	GSTO2	10	119391		bA127L20.1
KPNA2	-0.453305	1281.64	936.07	5.37438e-05	KPNA2	17	3838		RCH1	IPOA1	SRP1alpha	QIP2
GYPC	-0.453169	1090.51	796.545	3.89689e-06	GYPC	2	2995		MGC126191	GE	CD236R	GYPD	CD236	GPC	MGC117309	MGC126192
FIGNL1	-0.45281	225.722	164.917	0.000292893	FIGNL1	7	63979
DUT	-0.452281	354.415	259.037	3.25216e-06	DUT	15	1854		dUTPase	FLJ20622
SNTB1	-0.451996	286.932	209.756	0.0036831	SNTB1	8	6641		A1B	DAPA1B	BSYN2	MGC111389	SNT2B1	SNT2	FLJ22442	59-DAP	TIP-43
THAP10	-0.451943	401.422	293.463	0.000112366	THAP10	15	56906
TMSL3	-0.451189	5671.31	4148.22	0.000113714	TMSL3	4	7117
HNRNPA1	-0.450823	282.966	207.025	0.00167335	HNRNPA1	12	3178		MGC102835	HNRNPA1
PLAC9	-0.450728	564.582	413.089	3.97838e-06	PLAC9	10	219348		MGC104710
PBX3	-0.450272	919.78	673.191	1.05782e-05	PBX3	9	5090
PECR	-0.450109	279.748	204.772	2.73586e-05	PECR	2	55825		HSA250303	TERP
MAGEF1	-0.449186	343.945	251.924	0.00415196	MAGEF1	3	64110		MGC19617
PPP2R5E	-0.449034	1480.82	1084.75	3.5587e-06	PPP2R5E	14	5529
GPR126	-0.448696	220.944	161.886	0.000253958	GPR126	6	57211		VIGR	DREG	APG1	PS1TP2
C1R	-0.448676	206.766	151.5	0.0370617	C1R	12	715
DKC1	-0.4482	1918.48	1406.16	1.03066e-07	DKC1	X	1736		NAP57	NOLA4	XAP101	dyskerin	DKC
RHBDF2	-0.447937	259.394	190.159	3.68551e-05	RHBDF2	17	79651		RHBDL6	RHBDL5	FLJ22341
BARD1	-0.447825	301.182	220.811	1.18681e-05	BARD1	2	580
HNRNPR	-0.446852	2828.86	2075.37	3.15497e-06	HNRNPR	1	10236		HNRPR	hnRNP-R	FLJ25714
CRIPT	-0.446273	452.956	332.441	3.09485e-05	CRIPT	2	9419		HSPC139
GGH	-0.445875	1448.3	1063.25	0.00309489	GGH	8	8836		GH
SAFB	-0.444283	585.162	430.065	8.82592e-08	SAFB	19	6294		DKFZp779C1727	SAFB1	HET	HAP
LOC91431	-0.443372	217.377	159.862	0.000358739	LOC91431	4	91431
TMPO	-0.443208	239.953	176.485	0.000249215	TMPO	12	7112		MGC61508	PRO0868	CMD1T	TP	LAP2
NARS2	-0.442991	411.604	302.779	0.000202985	NARS2	11	79731		SLM5	FLJ23441
ANP32B	-0.44236	7905.73	5818.06	3.98604e-09	ANP32B	9	10541		PHAPI2	SSP29	APRIL
UCHL5IP	-0.442262	366.052	269.407	0.0109676	UCHL5IP	X	55559		HSXQ28ORF	UIP1
MED30	-0.442133	490.769	361.228	1.67496e-06	MED30	8	90390		TRAP25	MGC9890	MED30	THRAP6
CDO1	-0.44195	194.346	143.066	0.00729749	CDO1	5	1036
EXOSC3	-0.441614	1325.11	975.691	2.05122e-07	EXOSC3	9	51010		RP11-3J10.8	hRrp40p	MGC15120	p10	Rrp40p	CGI-102	RRP40	MGC723	bA3J10.7
XRCC3	-0.441508	277.363	204.24	0.00673998	XRCC3	14	7517
GPC2	-0.441406	242.409	178.514	0.000631975	GPC2	7	221914		FLJ38962	DKFZp547M109
TRIB3	-0.4414	455.144	335.177	3.99073e-06	TRIB3	20	57761		TRB3	C20orf97	SKIP3	NIPK	SINK
PDS5B	-0.441383	272.959	201.015	0.000380299	PDS5B	13	23047		AS3	PDS5B	FLJ23236	RP1-267P19.1	KIAA0979	APRIN	CG008
COL15A1	-0.441308	225.532	166.097	0.00332808	COL15A1	9	1306		FLJ38566
SPA17	-0.441067	802.391	591.033	0.0133837	SPA17	11	53340		SP17	SP17-1
FABP4	-0.440983	382.239	281.57	0.000507236	FABP4	8	2167		A-FABP
RELB	-0.440061	234.816	173.083	0.00170744	RELB	19	5971		I-REL
MSH6	-0.44003	1532.96	1129.98	5.04407e-05	MSH6	2	2956		HSAP	HNPCC5	GTBP
SMC2	-0.439594	300.619	221.659	8.43451e-05	SMC2	9	10592		SMC2L1	hCAP-E	FLJ10093	CAPE	CAP-E
CCDC59	-0.439202	2073.86	1529.56	7.33167e-09	CCDC59		29080		FLJ10294	HSPC128
FTHL11	-0.439054	1626.93	1200.05	0.00609247	FTHL11	8	2503
SNRNP40	-0.437952	1141.86	842.896	0.0051216	SNRNP40	1	9410		SPF38	MGC1910	PRPF8BP	40K	PRP8BP	FLJ41108	RP11-490K7.3
CADM1	-0.437548	225.871	166.781	0.00367968	CADM1	11	23705		sgIGSF	Necl-2	IGSF4	MGC149785	DKFZp686F1789	TSLC1	synCAM1	RA175	SYNCAM	IGSF4A	sTSLC-1	BL2	NECL2
REEP4	-0.437508	227.496	167.985	0.00929871	REEP4	8	80346		FLJ22246	PP432	C8orf20	FLJ22277
ECSCR	-0.437481	190.226	140.467	0.00756487	ECSCR	5	641700
TAF5	-0.437122	226.841	167.546	0.000821609	TAF5	10	6877		TAFII100	TAF2D
FOXM1	-0.436933	469.008	346.458	0.000527415	FOXM1	12	2305		MPP-2	INS-1	HFH11	TGT3	MPP2	PIG29	TRIDENT	HFH-11	FKHL16	MPHOSPH2	HNF-3	FOXM1B
DHX33	-0.436702	518.892	383.369	5.21062e-06	DHX33	17	56919		DDX33	FLJ21972	DKFZp762F2011
RAB13	-0.4361	525.505	388.416	0.0123984	RAB13	1	5872		GIG4
KIAA1467	-0.435703	192.534	142.347	0.0019111	KIAA1467	12	57613		DKFZp781O012
RCC2	-0.435014	1540.09	1139.18	9.94419e-05	RCC2	1	55920		DKFZp762N0610	KIAA1470	TD-60
CDK2	-0.433263	1109.1	821.385	0.000793136	CDK2	12	1017		p33(CDK2)
C15orf23	-0.432811	550.796	408.039	0.000600785	C15ORF23	15	90417		FLJ14502	HSD11
ROBO3	-0.432172	430.318	318.928	1.38872e-06	ROBO3	11	64221		HGPS	HGPPS	RBIG1	FLJ21044	RIG1
SHC3	-0.431707	311.467	230.916	2.48425e-05	SHC3	9	53358		SHCC	N-Shc	NSHC
PACSIN3	-0.431578	318.485	236.141	0.000723311	PACSIN3	11	29763		SDPIII
SHMT1	-0.431342	221.954	164.595	6.99749e-05	SHMT1	17	6470		MGC15229	MGC24556	SHMT	CSHMT
FLJ10357	-0.43131	202.143	149.907	0.00406697	FLJ10357	14	55701		SOLO
EXOSC2	-0.43129	553.284	410.315	0.00609711	EXOSC2	9	23404		p7	RRP4	hRrp4p	Rrp4p
SNORD36C	-0.430962	299.114	221.873	0.000812819	SNORD36C	9	26813		RNU36C	U36c
COL16A1	-0.430359	668.518	496.092	0.00016819	COL16A1	1	1307		FP1572	447AA
PPAP2B	-0.430199	1188.07	881.734	0.00147397	PPAP2B	1	8613		MGC15306	LPP3	Dri42	VCIP	PAP2-beta	PAP2-b	PAP-2b
HMGB1	-0.430139	272.712	202.404	0.00197024	HMGB1	13	3146		DKFZp686A04236	HMG3	SBP-1	HMG1
KHDRBS1	-0.429554	6962.84	5169.85	2.24737e-07	KHDRBS1	1	10657		Sam68	FLJ34027	p62
ZNF480	-0.42931	299.751	222.601	0.000369882	ZNF480	19	147657		MGC32104
MKI67	-0.429261	232.955	173.002	0.00113202	MKI67	10	4288		KIA	Ki-67
SLC38A6	-0.429022	440.918	327.499	0.0146816	SLC38A6	14	145389		NAT-1	MGC102697
MOV10	-0.428491	354.277	263.242	0.00056755	MOV10	1	4343		FLJ32791	DKFZp667O1423	gb110	KIAA1631
FLJ42986	-0.42842	227.502	169.051	0.00397597	FLJ42986		389012
SUPT16H	-0.427949	1853.17	1377.49	0.018947	SUPT16H	14	11198		FACT	FLJ14010	SPT16/CDC68	CDC68	FACTP140	FLJ34357	FLJ10857
GMCL1	-0.427891	302.73	225.034	0.00184948	GMCL1	2	64395		GCL1	BTBD13	GCL
GPR180	-0.42776	556.422	413.652	0.000405022	GPR180	13	160897		ITR
ACTL6A	-0.426649	1359.19	1011.22	0.00167694	ACTL6A	3	86		MGC5382	BAF53A	ACTL6
DDX39	-0.426474	3022.72	2249.14	0.000365081	DDX39	19	10212		BAT1	MGC18203	BAT1L	DDXL	URH49	MGC8417
TUBB	-0.425605	11487.6	8552.81	1.758e-08	TUBB	6	203068		M40	OK/SW-cl.56	MGC117247	TUBB1	MGC16435	TUBB5
PXMP2	-0.424776	455.371	339.231	0.00123822	PXMP2	12	5827		PMP22
TAF4	-0.424602	393.18	292.936	4.16931e-06	TAF4	20	6874		TAFII135	TAF2C1	TAF4A	TAFII130	FLJ41943	TAF2C
PRPF38A	-0.424585	254.401	189.542	0.000234184	PRPF38A	1	84950		MGC3320	FLJ14936	RP5-965L7.1
C13orf23	-0.423792	293.567	218.843	0.00133035	C13ORF23	13	80209		FLJ23780	bA50D16.2	RP11-50D16.2	FLJ12661
HHEX	-0.423367	378.683	282.377	0.0179563	HHEX	10	3087		HEX	PRH	PRHX	HOX11L-PEN	HMPH
FAR1	-0.422839	493.157	367.873	0.00133648	FAR1	11	84188		FLJ33561	FAR1	DKFZp686P18247	FLJ22728	DKFZp686A0370
GPRIN1	-0.422748	204.524	152.575	0.00122946	GPRIN1	5	114787		KIAA1893	GRIN1
SRBD1	-0.422315	320.746	239.349	0.00212577	SRBD1	2	55133		FLJ10379
CTDSPL2	-0.422209	307.842	229.737	0.000355149	CTDSPL2	15	51496		FLJ10523	HSPC129	HSPC058
SNORD96A	-0.42209	252.899	188.749	0.000258181	SNORD96A	5	619571		U96A
METTL14	-0.422024	243.528	181.764	0.0136821	METTL14	4	57721
ALMS1	-0.421922	207.038	154.539	0.00843493	ALMS1	2	7840		KIAA0328	ALSS
PTPLAD1	-0.420942	1023.67	764.619	6.20025e-05	PTPLAD1	15	51495		B-IND1	HSPC121	FLJ90376
LIN9	-0.42089	223.568	166.998	0.0242207	LIN9	1	286826		TGS	BARA	TGS1	Lin-9	BARPsv
SKP2	-0.41997	695.367	519.745	0.000174148	SKP2	5	6502		MGC1366	FBXL1	FBL1	FLB1
COQ2	-0.418984	980.009	732.998	1.01215e-07	COQ2	4	27235		CL640	FLJ26072
POLD1	-0.418907	318.032	237.885	0.0081947	POLD1	19	5424		CDC2	POLD
ANKRD28	-0.417801	324.946	243.243	0.000507212	ANKRD28	3	23243		PITK	KIAA0379
NPAT	-0.417789	202.668	151.711	0.0172825	NPAT	11	4863		E14
IGF2BP2	-0.417659	3166.72	2370.72	0.00647017	IGF2BP2	3	10644		IMP-2	VICKZ2	p62	IMP2
OSGEP	-0.417615	332.811	249.163	0.000376497	OSGEP	14	55644		OSGEP1	FLJ20411	PRSMG1	GCPL1	KAE1
KIAA0831	-0.417204	402.838	301.675	0.03312	KIAA0831	14	22863		MGC126291	MGC126292
C1orf31	-0.417127	279.984	209.684	9.85289e-05	C1ORF31	1	388753
SEMA3A	-0.416669	1500.99	1124.47	0.000446662	SEMA3A	7	10371		SEMAIII	SEMAD	MGC133243	SEMA1	Hsema-III	Hsema-I	SemD	sema III	coll-1	SEMAL
BRIX1	-0.416578	1868.47	1399.86	4.35956e-05	BRIX1	5	55299		BRIX	FLJ11100
HNRNPD	-0.416522	8857.82	6636.53	1.82558e-07	HNRNPD	4	3184		P37	AUF1	hnRNPD0	AUF1A
C4orf27	-0.416235	510.853	382.822	1.36564e-06	C4ORF27	4	54969		FLJ20534
TOPBP1	-0.416094	666.567	499.559	0.000327953	TOPBP1	3	11073		TOP2BP1
GMPS	-0.415918	991.096	742.869	0.0189967	GMPS	3	8833
C1orf163	-0.415802	322.947	242.082	3.1566e-05	C1ORF163	1	65260		FLJ12439
CAPG	-0.415239	264.852	198.612	0.00533483	CAPG	2	822		AFCP	MCP
MASTL	-0.41467	224.822	168.66	0.0099819	MASTL	10	84930		RP11-85G18.2	FLJ14813	THC2
CREB3L2	-0.414457	3802.8	2853.25	4.95296e-08	CREB3L2	7	64764		MGC131709	BBF2H7	MGC71006
RILPL2	-0.414231	232.928	174.794	0.00209636	RILPL2	12	196383		FLJ30380	MGC7036	FLJ32372
SRFBP1	-0.413947	365.506	274.337	0.0109235	SRFBP1	5	153443		P49	FLJ25286	STRAP	p49/STRAP
BAZ1A	-0.413303	569.314	427.499	0.000164021	BAZ1A	14	11177		WALp1	hACF1	DKFZP586E0518	FLJ14383	ACF1	WCRF180
DIAPH3	-0.413106	454.788	341.548	0.00982449	DIAPH3	13	81624		FLJ34705	DRF3	DKFZP434C0931	diap3	DKFZp686A13178
PHF19	-0.413096	490.697	368.518	0.00502224	PHF19	9	26147		MGC131698	PCL3	MGC23929	MGC149713	MGC149712
USP13	-0.413067	706.821	530.841	3.97303e-06	USP13	3	8975
EHBP1	-0.411892	1786.28	1342.63	9.39688e-07	EHBP1	2	23301		KIAA0903	NACSIN
SERBP1	-0.411319	597.673	449.411	5.30998e-05	SERBP1	1	26135		CGI-55	FLJ90489	DKFZp564M2423	CHD3IP	PAIRBP1	PAI-RBP1	HABP4L
PCF11	-0.410301	307.449	231.345	0.00267103	PCF11	11	51585		KIAA0824
DYRK2	-0.410235	309.602	232.976	8.20698e-05	DYRK2	12	8445
CARD10	-0.410074	542.682	408.414	0.000815463	CARD10	22	29775		CARMA3	BIMP1	MGC142219
NEURL1B	-0.409771	317.966	239.347	0.000232227	NEURL1B	5	54492
SLITRK5	-0.409263	206.63	155.594	0.0040244	SLITRK5	13	26050		bA364G4.2	KIAA0918	LRRC11
RSRC1	-0.409188	359.64	270.826	4.32608e-05	RSRC1	3	51319		BM-011	MGC12197
ZNF697	-0.409078	285.515	215.023	0.0141112	ZNF697	1	90874		MGC45731
ZNF362	-0.408476	535.98	403.817	0.000203292	ZNF362	1	149076		RP11-415J8.1	MGC138318
PHF14	-0.408198	235.939	177.795	0.0493682	PHF14	7	9678		MGC176640
NUP35	-0.40798	308.67	232.637	0.00536971	NUP35	2	129401		MP44	NP44
CDC42EP4	-0.407793	1594.94	1202.23	0.0211908	CDC42EP4	17	23580		MGC17125	MGC3740	BORG4	KAIA1777	CEP4
ARID4B	-0.4077	591.548	445.924	9.3011e-06	ARID4B	1	51742		BCAA	RBP1L1	MGC163290	BRCAA1	SAP180	RBBP1L1	DKFZp313M2420
LSM5	-0.407555	407.127	306.933	0.000424437	LSM5	7	23658		YER146W	FLJ12710
TTYH3	-0.407255	1207.02	910.163	0.0377771	TTYH3	7	80727		KIAA1691
ABCC3	-0.407109	274.417	206.947	0.000504947	ABCC3	17	8714		cMOAT2	MRP3	MLP2	ABC31	MOAT-D	EST90757
CEP78	-0.406989	333.65	251.637	0.000160947	CEP78	9	84131		IP63	MGC135040	C9orf81	FLJ12643
ALDH1A3	-0.40691	199.423	150.412	0.0163556	ALDH1A3	15	220		RALDH3	ALDH6	ALDH1A6
NUCKS1	-0.406866	5682.85	4286.35	0.000126192	NUCKS1	1	64710		NUCKS	FLJ21480	JC7
LOC723972	-0.40677	353.939	266.98	0.0168687	LOC723972	15	723972
CISD2	-0.406262	302.205	228.037	8.50165e-05	CISD2	4	493856		ERIS	WFS2	ZCD2	Miner1
PRKDC	-0.406142	480.291	362.446	1.28851e-05	PRKDC	8	5591		XRCC7	p350	DNPK1	HYRC1	HYRC	DNAPK
SET	-0.406036	4325.56	3264.47	0.000382302	SET	9	6418		IGAAD	TAF-IBETA	PHAPII	I2PP2A	2PP2A
KARS	-0.405954	903.952	682.246	1.75973e-06	KARS	16	3735		KIAA0070	KARS2
DDX27	-0.405609	554.555	418.644	4.19864e-05	DDX27	20	55661		HSPC259	RHLP	FLJ12917	DKFZp667N057	Rrp3p	MGC163147	MGC1018	FLJ22238	dJ686N3.1	PP3241	FLJ20596
C1orf59	-0.404376	218.411	165.024	0.00614174	C1ORF59	1	113802		MGC111091	RP11-256E16.2	FLJ30525
KIAA1731	-0.403854	395.941	299.266	0.000364463	KIAA1731	11	85459		FLJ40913
C12orf65	-0.402893	348.192	263.352	7.8509e-05	C12ORF65	12	91574		FLJ38663
TICAM2	-0.402438	771.191	583.467	0.0188826	TICAM2	5	353376		MGC129877	MGC129876	TIRP	TICAM-2	TIRAP3	TRAM
KIAA1598	-0.40234	226.36	171.271	0.00131472	KIAA1598	10	57698		shootin1	shootin-1	MGC40476	DKFZp686A0439
RBM14	-0.402314	1475.25	1116.24	1.77592e-06	RBM14	11	10432		SYTIP1	COAA	SIP	DKFZp779J0927
TRRAP	-0.402176	1492.66	1129.52	7.88469e-07	TRRAP	7	8295		PAF400	STAF40	Tra1	FLJ10671	PAF350/400	TR-AP
DDX18	-0.402019	1273.76	963.976	0.00166376	DDX18	2	8886		FLJ33908	MrDb
KIAA1147	-0.401996	294.569	222.933	0.000128443	KIAA1147	7	57189		PRO2561	LCHN
LOC440396	-0.401766	193.801	146.694	0.0215327	LOC440396	17	440396
NOV	-0.401475	204.844	155.084	0.0200032	NOV	8	4856		IGFBP9	NOVH	CCN3
MCM5	-0.401284	699.13	529.37	0.00105702	MCM5	22	4174		MGC5315	CDC46	P1-CDC46
SLC36A4	-0.400384	332.575	251.978	0.00259191	SLC36A4	11	120103		FLJ38932	PAT4
TIMM10	-0.400259	961.257	728.365	0.0243996	TIMM10	11	26519		TIM10A	TIM10
CWF19L2	-0.400241	251.016	190.203	0.000487495	CWF19L2	11	143884		FLJ32343
COMMD4	-0.399977	2205.43	1671.43	0.00579466	COMMD4	15	54939		FLJ20452
CDH13	-0.399722	266.959	202.356	0.0343927	CDH13	16	1012		CDHH
TXNDC5	-0.39943	1379.47	1045.86	0.0111793	TXNDC5	6	81567		UNQ364	ERP46	MGC3178	EndoPDI
NUPR1	-0.399234	312.844	237.217	0.0287637	NUPR1	16	26471		P8	COM1
MYST1	-0.398717	219.767	166.701	0.00394652	MYST1	16	84148		FLJ14040	MOF	KAT8	hMOF
PRR3	-0.398404	261.912	198.712	0.00235306	PRR3	6	80742		MGC161733	CAT56	MGC161735
AHCTF1	-0.397877	433.795	329.239	1.35515e-05	AHCTF1	1	25909		ELYS	TMBS62	MSTP108	MST108	DKFZp434N093
BCL2L12	-0.397449	728.481	553.062	0.000832804	BCL2L12	19	83596		MGC120315	MGC120314	MGC120313
CRABP2	-0.397027	288.437	219.045	0.000217359	CRABP2	1	1382		CRABP-II	RBP6
ZBED4	-0.396817	424.851	322.688	1.25757e-05	ZBED4	22	9889
DARS2	-0.395683	344.868	262.144	0.00185395	DARS2	1	55157		FLJ10514	RP3-383J4.2	ASPRS. LBSL	ASPRS
THYN1	-0.395658	415.916	316.155	0.00111298	THYN1	11	29087		MY105	MGC12187	MDS012	THY28	HSPC144	THY28KD
RIF1	-0.394519	253.741	193.032	0.00773874	RIF1	2	55183		DKFZp781N1478	FLJ12870
PARP2	-0.39407	417.81	317.945	0.0138207	PARP2	14	10038		ADPRTL3	PARP-2	ADPRTL2	ADPRT2	pADPRT-2
AARS2	-0.393532	366.931	279.331	0.0027403	AARS2	6	57505		KIAA1270	AARSL	bA444E17.1
TARDBP	-0.393372	273.782	208.444	0.0170338	TARDBP	1	23435		TDP-43
KLHL13	-0.393109	180.309	137.303	0.0119557	KLHL13	X	90293		BKLHD2	FLJ10262	MGC74791	KIAA1309
ZNF326	-0.393101	238.921	181.936	0.0139463	ZNF326	1	284695		FLJ20403	dJ871E2.1	ZAN75	Zfp326	MGC61591
ZNF643	-0.392901	186.127	141.754	0.00606341	ZNF643	1	65243		FLJ34293	RP11-656D10.1
RPA1	-0.392384	1140.2	868.682	6.0996e-07	RPA1	17	6117		RPA70	REPA1	RF-A	HSSB	RP-A
TTC26	-0.392252	268.791	204.802	0.0102062	TTC26	7	79989		MGC163211	FLJ12571	dyf-13
PARP12	-0.39182	255.717	194.899	0.00057823	PARP12	7	64761		MSTP109	FLJ22693	ZC3H1	ZC3HDC1	MST109	PARP-12
KLHDC3	-0.391346	1201.46	916.016	0.000249389	KLHDC3	6	116138		RP1-20C7.3	hPEAS	hPeas	dJ20C7.3	PEAS
SNRPA	-0.390721	749.874	571.965	0.00299656	SNRPA	19	6626		U1A
TOP1P2	-0.390621	507.559	387.166	0.00106752	TOP1P2	22	7152
FLI1	-0.390495	249.53	190.358	0.0360537	FLI1	11	2313		SIC-1	EWSR2
TCEAL7	-0.390448	371.173	283.165	0.0241216	TCEAL7	X	56849		MGC23947	MPMGp800C04260Q003
PLAGL2	-0.390415	422.102	322.026	0.00107633	PLAGL2	20	5326		FLJ23283
C11orf46	-0.389348	501.635	382.985	0.0146014	C11ORF46	11	120534		dJ299F11.1	FLJ38968
C12orf45	-0.389212	418.75	319.735	2.1246e-05	C12ORF45	12	121053		MGC40397
FZD2	-0.389207	2291.38	1749.58	0.00661124	FZD2	17	2535
TCF3	-0.389169	505.395	385.904	7.85604e-06	TCF3	19	6929		MGC129648	MGC129647	ITF1	E2A
SNORA62	-0.389168	308.343	235.441	0.0472393	SNORA62	3	6044		RNE2	RNU108	E2	E2-1
ZNF22	-0.388795	947.236	723.468	0.000394577	ZNF22	10	7570		HKR-T1	Zfp422	KOX15	ZNF422
RPL7	-0.388739	2905.42	2219.15	0.00373655	RPL7	8	6129		MGC117326	humL7-1
B4GALT5	-0.38853	1250.4	955.192	7.28906e-07	B4GALT5	20	9334		beta4Gal-T5	BETA4-GALT-IV	B4Gal-T5	gt-V	beta4GalT-V
TSEN15	-0.388218	363.66	277.863	0.00135184	TSEN15	1	116461
C9orf40	-0.387984	269.251	205.761	0.000456931	C9ORF40	9	55071		FLJ10110	FLJ25795
C12orf32	-0.387955	342.848	262.009	8.07764e-05	C12ORF32	12	83695		MGC13204	HKMT1188
PPIG	-0.38687	391.691	299.56	0.000295626	PPIG	2	9360		CYP	SRCyp	MGC133241	CARS-Cyp
HNRNPAB	-0.386483	3750.92	2869.43	4.76914e-09	HNRNPAB	5	3182		ABBP1	FLJ40338
ECHDC3	-0.386478	384.259	293.956	4.13428e-05	ECHDC3	10	79746		FLJ20909
C7orf68	-0.386211	422.331	323.141	0.00208657	C7ORF68	7	29923		FLJ21076	MGC138388
NID1	-0.385618	244.666	187.28	0.00232973	NID1	1	4811		NID
LRRC58	-0.385168	354.309	271.291	0.00740106	LRRC58	3	116064
FAM72B	-0.38482	215.977	165.412	0.0319369	FAM72B	1	653820		RP11-439A17.6
TMEM177	-0.384411	309.164	236.848	0.00547666	TMEM177	2	80775		MGC10993
SPOCK1	-0.384227	206.168	157.964	0.00370305	SPOCK1	5	6695		SPOCK	TESTICAN	TIC1	FLJ37170
USP37	-0.383721	229.599	175.978	0.0234129	USP37	2	57695		KIAA1594	MGC117261
PRPF4	-0.38352	1472.42	1128.7	1.16651e-06	PRPF4	9	9128		HPRP4P	PRP4	HPRP4	Prp4p
RPIA	-0.383398	407.937	312.737	4.71863e-05	RPIA	2	22934		RPI
FANCI	-0.38288	491.133	376.653	1.30963e-05	FANCI	15	55215		FLJ10719	KIAA1794
AGPAT5	-0.382846	241.359	185.104	0.0419161	AGPAT5	8	55326		1-AGPAT5	LPAAT-epsilon	LPAAT-e
POP1	-0.382747	384.429	294.848	5.02375e-05	POP1	8	10940		KIAA0061	MGC17365
LOC731486	-0.382675	194.76	149.383	0.00748507	LOC731486		731486
C1orf135	-0.382621	185.019	141.917	0.0191521	C1ORF135	1	79000		FLJ14264	MGC2603
PRR16	-0.38253	518.859	398.012	1.04608e-05	PRR16	5	51334		DSC54	MGC104614
CCDC18	-0.382185	218.528	167.671	0.0028498	CCDC18	1	343099		dJ717I23.1	NY-SAR-41	RP4-717I23.1
AP1S2	-0.381602	4526.32	3474.33	1.70081e-05	AP1S2	X	8905		MGC:1902	SIGMA1B	MRX59	DC22
DSN1	-0.380774	316.578	243.14	0.0196197	DSN1	20	79980		FLJ13346	dJ469A13.2	MIS13	C20orf172	MGC32987
ENY2	-0.38013	3657.21	2810.09	1.45733e-06	ENY2	8	56943		DC6	FLJ20480	e(y)2
C4orf46	-0.379393	362.157	278.412	0.000267533	C4ORF46	4	201725
TIPIN	-0.379161	302.005	232.207	0.0113581	TIPIN	15	54962		FLJ20516
MIR599	-0.37903	182.573	140.391	0.0325846	MIR599		693184
CPSF4	-0.378913	882.608	678.741	0.000206068	CPSF4	7	10898		NAR	NEB1	CPSF30
LRRC8C	-0.378853	275.235	211.669	0.0106533	LRRC8C	1	84230		AD158	FAD158	DKFZp586J1119	MGC138551
CCDC88A	-0.37846	207.598	159.697	0.0081664	CCDC88A	2	55704		GRDN	HkRP1	KIAA1212	GIV	APE	DKFZp686D0630
PDGFRB	-0.378443	2825.23	2173.35	0.0123501	PDGFRB	5	5159		PDGFR	JTK12	CD140B	PDGF-R-beta	PDGFR1
HLA-DRB3	-0.378361	429.842	330.683	3.34848e-05	HLA-DRB3	6	3125		MGC117330	HLA-DR3B
IER2	-0.377983	452.428	348.149	0.00692662	IER2	19	9592		ETR101	MGC111472	MGC15265
CCDC152	-0.377559	185.116	142.491	0.00933234	CCDC152	5	100129792
BAK1	-0.377209	209.927	161.628	0.0199382	BAK1	6	578		MGC3887	BCL2L7	CDN1	BAK	BAK-LIKE	MGC117255
FAM133B	-0.376994	510.387	393.019	0.00450043	FAM133B	7	257415		MGC40405
ZNF215	-0.376916	191.38	147.379	0.00761088	ZNF215	11	7762		BAZ2
ZNF621	-0.376432	504.9	388.945	1.71429e-05	ZNF621	3	285268		FLJ45246	MGC126668	FLJ23786	DKFZp686B11107
MED4	-0.376323	441.218	339.913	0.000350773	MED4	13	29079		VDRIP	HSPC126	RP11-90M2.2	FLJ10956	TRAP36	DRIP36
PKMYT1	-0.376221	284.317	219.053	0.0131466	PKMYT1	16	9088		MYT1	DKFZp547K1610	FLJ20093
RNU4ATAC	-0.375871	253.606	195.439	0.0123642	RNU4ATAC	2	100151683
DDIT4L	-0.375602	177.387	136.727	0.0128704	DDIT4L	4	115265		Rtp801L	REDD2
PAXIP1	-0.375504	292.333	225.341	0.0119822	PAXIP1	7	22976		TNRC2	PACIP1	CAGF29	PAXIP1L	CAGF28	PTIP	FLJ41049
RBM25	-0.375402	1279.91	986.668	0.0187195	RBM25	14	58517		S164	MGC105088	RNPC7	MGC117168	RED120
C14orf80	-0.375094	239.385	184.579	0.0369433	C14ORF80	14	283643		MGC16771
CNDP2	-0.374949	2508.99	1934.77	0.00949748	CNDP2	18	55748		FLJ10830	CPGL	CN2	PEPA	HsT2298
ADAMTS6	-0.374472	253.725	195.72	0.00860545	ADAMTS6	5	11174		ADAM-TS6
WDR91	-0.374458	238.362	183.871	0.00181111	WDR91	7	29062		HSPC049
C17orf80	-0.374435	256.955	198.217	0.00346151	C17ORF80	17	55028		FLJ20721	HLC-8	MIG3
COIL	-0.374223	524.211	404.44	2.64712e-05	COIL	17	8161		p80-coilin	CLN80
RANBP1	-0.373705	7098.57	5478.66	0.0111126	RANBP1	22	5902		MGC88701
SNX5	-0.373691	650.473	502.039	0.00175186	SNX5	20	27131		FLJ10931
MAD2L1	-0.373174	263.642	203.554	0.00272595	MAD2L1	4	4085		MAD2	HSMAD2
EFNB1	-0.37305	244.814	189.033	0.0347907	EFNB1	X	1947		MGC8782	LERK2	CFNS	EFL3	CFND	EPLG2	Elk-L
SCLT1	-0.373044	191.075	147.539	0.0102054	SCLT1	4	132320		FLJ30655	hCAP-1A	FLJ36042	MGC70542
CWF19L1	-0.372843	974.329	752.434	9.90008e-05	CWF19L1	10	55280		FLJ10998	RP11-316M21.3
TMEM51	-0.372765	1425.55	1100.96	0.000367961	TMEM51	1	55092		FLJ10199	C1orf72
PRKRIR	-0.372499	1227.53	948.201	0.00219384	PRKRIR	11	5612		MGC102750	DAP4	P52rIPK
C3orf14	-0.372418	500.032	386.268	0.0226899	C3ORF14	3	57415		HT021
ZNF280D	-0.372274	317.461	245.259	0.000293291	ZNF280D	15	54816		ZNF634	MGC61687	MGC21637	SUHW4
UBE2E1	-0.372248	1884.01	1455.54	0.0205069	UBE2E1	3	7324		UBCH6
MFAP4	-0.37221	424.529	327.99	0.0405136	MFAP4	17	4239
AKAP12	-0.37214	257.67	199.085	0.0376235	AKAP12	6	9590		DKFZp686M0430	AKAP250	DKFZp686O0331
ELF2	-0.372086	260.526	201.299	0.0012434	ELF2	4	1998		NERF	NERF-1A	NERF-2	EU32	NERF-1B	b
AGTR1	-0.371964	251.518	194.355	0.0254883	AGTR1	3	185		AT2R1A	AT2R1B	AT2R1	AT1	AT1B	AGTR1B	AGTR1A	AG2S	HAT1R
PPT1	-0.371669	2012.71	1555.6	0.000275823	PPT1	1	5538		CLN1	INCL	PPT
CENPL	-0.371668	344.547	266.297	0.0106931	CENPL	1	91687		C1orf155	RP3-383J4.1	FLJ31786	dJ383J4.3	CENP-L	FLJ31044
ZNF232	-0.371511	198.061	153.096	0.021867	ZNF232	17	7775		ZSCAN11
PGD	-0.370847	2403.07	1858.36	1.78994e-06	PGD	1	5226		6PGD
COQ3	-0.37081	744.956	576.111	6.42006e-06	COQ3	6	51805		bA9819.1	UG0215E05
GEMIN4	-0.370701	859.305	664.592	0.0246358	GEMIN4	17	50628		HC56	p97	DKFZP434B131	DKFZP434D174	HHRF-1	HCAP1
FAM76B	-0.370384	194.56	150.507	0.00889988	FAM76B	11	143684		MGC33371
SKA2	-0.370051	825.721	638.906	0.0195089	SKA2	17	348235		MGC110975	Ska2	FLJ12758
FADS2	-0.368988	191.803	148.518	0.0101874	FADS2	11	9415		SLL0262	LLCDL2	FADSD6	D6D	DES6	TU13
PHCA	-0.368961	451.466	349.589	7.68959e-05	PHCA	11	55331		FLJ11238	APHC
NXT1	-0.368896	921.85	713.857	0.000430104	NXT1	20	29107		P15	MTR2
MIS12	-0.368866	718.154	556.132	0.00483114	MIS12	17	79003		MTW1	hMis12	MGC2488	2510025F08Rik	KNTC2AP
MSL3L1	-0.368688	488.127	378.048	3.13123e-05	MSL3L1	X	10943		DKFZP586J1822
IPO11	-0.368535	635.824	492.489	0.000700658	IPO11	5	51194		RanBP11	SLRN
PPAT	-0.368379	459.904	356.265	0.0211959	PPAT	4	5471		ATASE	GPAT	PRAT
LITAF	-0.368035	2879.65	2231.26	0.0200913	LITAF	16	9516		MGC125274	MGC116701	CMT1C	MGC116700	SIMPLE	TP53I7	FLJ38636	PIG7	MGC125276	MGC116698	MGC125275
ZNF689	-0.367414	466.104	361.311	0.00105615	ZNF689	16	115509		FLJ90415	DKFZp762C173	TIPUH1
NUP205	-0.36592	1382.55	1072.82	3.47226e-06	NUP205	7	23165		C7orf14
RECQL4	-0.365496	190.481	147.852	0.0252169	RECQL4	8	9401		RECQ4	RTS
BTN3A2	-0.365368	227.349	176.485	0.00337106	BTN3A2	6	11118		BT3.3	BT3.2	BTF4
DPYSL2	-0.365227	3533.24	2743.02	0.0391061	DPYSL2	8	1808		DHPRP2	DRP-2	DRP2	CRMP2
DYRK4	-0.365051	744.951	578.411	0.00110539	DYRK4	12	8798
SETMAR	-0.364308	517.513	402.025	0.000258093	SETMAR	3	6419		METNASE
MATN2	-0.363407	316.843	246.291	0.00115212	MATN2	8	4147
PYCARD	-0.362883	311.596	242.3	0.000981977	PYCARD	16	29108		TMS1	MGC10332	ASC	CARD5
RPS4X	-0.362767	4403.35	3424.36	0.000269049	RPS4X	X	6191		DXS306	SCR10	CCG2	SCAR	FLJ40595
WDR70	-0.362649	627.033	487.666	0.00161736	WDR70	5	55100		FLJ10233
MITD1	-0.362418	625.793	486.779	0.00688758	MITD1	2	129531
RABL2B	-0.362132	327.986	255.178	0.00057632	RABL2B	22	11158
TOMM22	-0.36205	1727.52	1344.11	0.0137136	TOMM22	22	56993		TOM22	MSTP065	MST065	1C9-2
CNPY4	-0.36151	382.493	297.713	0.000613084	CNPY4	7	245812		MGC40499	PRAT4B
JARID1A	-0.361007	747.568	582.072	0.00380597	JARID1A	12	5927		RBP2	RBBP2
YKT6	-0.360971	174.087	135.551	0.0341192	YKT6	7	10652
SNN	-0.360953	199.142	155.062	0.00901952	SNN	16	8303
ZMYM4	-0.360899	438.587	341.519	0.000148953	ZMYM4	1	9202		KIAA0425	DKFZp686B09210	CDIR	ZNF198L3	DKFZp686L0547	ZNF262	MYM
BAZ1B	-0.360754	402.548	313.487	0.000663225	BAZ1B	7	9031		WBSCR9	WBSCR10	WSTF
TYW3	-0.36071	463.552	361.005	0.000726061	TYW3	1	127253		C1orf171	FLJ40918
KIAA0922	-0.360483	285.049	222.026	0.000915858	KIAA0922	4	23240		FLJ10592	TMEM131L	DKFZp586H1322
USP3	-0.360302	631.055	491.593	2.01168e-05	USP3	15	9960		UBP	MGC129878	SIH003	MGC129879
ACPL2	-0.360198	202.419	157.696	0.0224613	ACPL2	3	92370		FLJ23751
NUP93	-0.35969	1099.87	857.163	0.0122825	NUP93	16	9688		KIAA0095	MGC21106
NUP54	-0.359166	694.967	541.807	0.000808953	NUP54	4	53371		MGC13407
CHKA	-0.359153	349.497	272.476	0.0157178	CHKA	11	1119		CHK	CKI
SNORD17	-0.358791	202.932	158.25	0.00982169	SNORD17	20	692086		HBI-43
MPP6	-0.358217	356.106	277.808	0.00160204	MPP6	7	51678		p55T	VAM-1	VAM1	PALS2
SPATA13	-0.35817	205.556	160.365	0.0192975	SPATA13	13	221178		FLJ31208	MGC129989	FLJ35435	ASEF2	MGC129988	RP11-307N16.3
BCKDHA	-0.358136	265.29	206.972	0.0061385	BCKDHA	19	593		FLJ45695	MSUD1	MSU
FAM60A	-0.357559	280.998	219.315	0.0224908	FAM60A	12	58516
MLLT3	-0.357341	173.579	135.496	0.0401282	MLLT3	9	4300		FLJ2035	AF9	YEATS3
MOSPD2	-0.357316	303.951	237.269	0.0229125	MOSPD2	X	158747		MGC26706
B9D2	-0.357259	272.97	213.093	0.00136952	B9D2	19	80776		MGC4093	ICIS-1
HSPA1B	-0.35705	1522.32	1188.56	0.000205364	HSPA1B	6	3304		HSP70-2	HSPA1A
MAT2B	-0.357041	936.422	731.125	0.00862598	MAT2B	5	27430		TGR	MAT-II	MGC12237	Nbla02999	MATIIbeta
LRRC49	-0.356376	229.605	179.35	0.0414028	LRRC49	15	54839		FLJ20156
KCTD3	-0.356243	819.854	640.467	0.00120299	KCTD3	1	51133		MGC43935	NY-REN-45
MRPL48	-0.356135	456.147	356.367	0.00148928	MRPL48	11	51642		CGI-118	MGC13323
TCEA1	-0.356048	492.075	384.459	0.00942868	TCEA1	8	6917		SII	GTF2S	TF2S	TCEA	TFIIS
SFRS7	-0.355637	779.736	609.383	0.000915858	SFRS7	2	6432		9G8	HSSG1	AAG3	ZCRB2	RBM37	ZCCHC20
DONSON	-0.355623	368.005	287.607	0.00887283	DONSON	21	29980		B17	C21orf60	DKFZP434M035
SLC44A1	-0.355015	865.673	676.837	0.0134646	SLC44A1	9	23446		RP11-287A8.1	CHTL1	CD92	CDW92	CTL1
SLC40A1	-0.354787	176.07	137.684	0.0314438	SLC40A1	2	30061		IREG1	HFE4	MST079	FPN1	MTP1	MSTP079	SLC11A3
TMEM194A	-0.353152	351.201	274.945	0.0217892	TMEM194A	12	23306
PGBD1	-0.353121	334.182	261.627	0.001842	PGBD1	6	84547		dJ874C20.4	SCAND4	HUCEP-4
WDR12	-0.353014	689.304	539.688	0.000678417	WDR12	2	55759		FLJ12719	FLJ12720	FLJ10881	YTM1
NFKB1	-0.352824	1981.63	1551.71	0.00233438	NFKB1	4	4790		NF-kappa-B	DKFZp686C01211	MGC54151	NFKB-p105	NFKB-p50	EBP-1	KBF1
C11orf10	-0.352797	6792.94	5319.31	0.00467276	C11ORF10	11	746
ASF1A	-0.352204	344.688	270.024	0.0422348	ASF1A	6	25842		DKFZP547E2110	CIA	dJ329L24.2
SLC9A3R1	-0.352033	258.592	202.602	0.0023093	SLC9A3R1	17	9368		NHERF1	NHERF	EBP50
PHIP	-0.351677	658.203	515.816	0.000289233	PHIP	6	55023		FLJ20705	FLJ45918	ndrp	WDR11	MGC90216
CDC5L	-0.351531	584.154	457.832	0.000193665	CDC5L	6	988		KIAA0432	CEF1	PCDC5RP	dJ319D22.1	hCDC5
CLK2	-0.351042	273.417	214.364	0.0222525	CLK2		1196
RPS7	-0.351004	1526.54	1196.86	0.000196169	RPS7	2	6201
MGC12982	-0.350926	174.928	137.158	0.0257622	MGC12982	1	84793
THOC6	-0.350656	226.478	177.611	0.010072	THOC6	16	79228		MGC2655	WDR58
MTR	-0.350463	545.006	427.466	0.000523794	MTR	1	4548		FLJ45386
LOC730101	-0.350387	224.582	176.156	0.00162497	LOC730101	6	730101
MTP18	-0.350347	202.138	158.556	0.00359532	MTP18	22	51537		HSPC242
CSTF2	-0.350041	731.696	574.061	0.000180995	CSTF2	X	1478		CstF-64
HIST2H2BF	-0.349617	178.273	139.907	0.0225554	HIST2H2BF	1	440689		MGC131639
SNX26	-0.349284	377.393	296.243	0.00184411	SNX26	19	115703		FLJ39019	TCGAP
MAD2L2	-0.348701	1831.22	1438.04	0.0025322	MAD2L2	1	10459		REV7	MAD2B
ATL2	-0.348559	195.404	153.464	0.0139114	ATL2	2	64225		FLJ23293	ARL3IP2	ATL2	atlastin2
ATP8B1	-0.348479	276.733	217.349	0.00175056	ATP8B1	18	5205		FIC1	PFIC1	PFIC	ATPIC	BRIC
ITPR3	-0.348206	711.476	558.908	9.47931e-05	ITPR3	6	3710		FLJ36205	IP3R	IP3R3
PAQR8	-0.348095	200.582	157.581	0.0254705	PAQR8	6	85315		FLJ32521	LMPB1	FLJ46206	C6orf33	MPRB
KLHL3	-0.34806	210.331	165.244	0.0310458	KLHL3	5	26249		FLJ40871	KIAA1129	MGC44594
TMEM126A	-0.347976	1788.16	1404.93	0.000138133	TMEM126A	11	84233		DKFZp586C1924
EHD3	-0.347899	187.474	147.303	0.039353	EHD3	2	30845		PAST3
PKP4	-0.347086	342.221	269.044	0.0201868	PKP4	2	8502		FLJ31261	p0071	FLJ42243
PAFAH1B3	-0.346543	1105.96	869.801	0.00116078	PAFAH1B3	19	5050
PTGES3	-0.346456	2059.17	1619.57	0.0391809	PTGES3	12	10728		TEBP	P23
PHF3	-0.346369	575.107	452.357	0.0134473	PHF3	6	23469		MGC142212	MGC142210	KIAA0244
TMEM39B	-0.34611	500.777	393.963	0.018961	TMEM39B	1	55116		FLJ10315	RP11-277A4.3
BLVRA	-0.345763	1887.08	1484.93	1.1816e-05	BLVRA	7	644		BVRA	BLVR
CCNI	-0.345745	7777.1	6119.81	0.000382302	CCNI	4	10983		CYC1	CYI
DOCK10	-0.345475	1055.86	831.014	0.003634	DOCK10	2	55619		Nbla10300	DKFZp781A1532	DRIP2	ZIZ3
CP110	-0.345284	562.062	442.429	8.07764e-05	CP110	16	9738		KIAA0419	DKFZp781G1416
CCDC49	-0.34481	315.567	248.481	0.00185395	CCDC49	17	54883		DKFZp779M0968	FLJ20291
CTPS2	-0.344743	347.858	273.92	0.00651596	CTPS2	X	56474		MGC32997	DKFZp686C17207	FLJ43358
ALDOC	-0.344607	439.373	346.016	0.000188414	ALDOC	17	230		ALDC
AEBP2	-0.344598	301.906	237.759	0.00122984	AEBP2	12	121536		MGC17922
CDCA4	-0.344352	566.488	446.201	0.00503591	CDCA4	14	55038		MGC19517	FLJ20764	HEPP
TMEM132A	-0.344135	458.967	361.565	0.00401649	TMEM132A	11	54972		DKFZp547E212	HSPA5BP1	FLJ20539	GBP	MGC138669
C8orf41	-0.344054	506.35	398.915	0.00144472	C8ORF41	8	80185		FLJ23263
SH3PXD2B	-0.343694	298.566	235.276	0.00135602	SH3PXD2B	5	285590		HOFI	FLJ20831	KIAA1295
STRADB	-0.343157	699.015	551.044	4.39205e-05	STRADB	2	55437		ILPIPA	ILPIP	PAPK	MGC102916	CALS-21	PRO1038
MTMR4	-0.343038	591.762	466.533	0.000665662	MTMR4	17	9110		FYVE-DSP2	ZFYVE11	KIAA0647
HDAC2	-0.342651	2051.59	1617.86	0.00180375	HDAC2	6	3066		YAF1	RPD3
KIF22	-0.342069	1003.59	791.744	0.0382141	KIF22	16	3835		KNSL4	OBP-1	KID	OBP-2	OBP
FUT4	-0.341622	200.53	158.249	0.0212852	FUT4	11	2526		FCT3A	ELFT	FUC-TIV	CD15
BRCA1	-0.34142	219.403	173.167	0.00566263	BRCA1	17	672		RNF53	BRCAI	PSCP	BRCC1	IRIS
NUAK2	-0.341304	223.437	176.365	0.00338575	NUAK2	1	81788		DKFZP434J037	SNARK	DKFZp686F01113	FLJ90349
NXT2	-0.341021	216.236	170.715	0.0187291	NXT2	X	55916		P15-2
MGC3731	-0.340983	726.598	573.651	0.0278452	MGC3731	22	79159		dJ37E16.7
ITPKA	-0.340718	231.113	182.498	0.0255582	ITPKA	15	3706		IP3KA
NEDD1	-0.340496	193.674	152.958	0.0320584	NEDD1	12	121441		TUBGCP7	FLJ35902	GCP-WD
TOP1	-0.340379	271.396	214.358	0.0349359	TOP1	20	7150		TOPI
AACS	-0.339798	219.409	173.366	0.00911588	AACS	12	65985		FLJ41251	SUR-5	FLJ12389	ACSF1
RNY1	-0.339684	341.308	269.706	0.00194946	RNY1	7	6084		Y1	HY1
UIMC1	-0.339263	872.93	690.003	0.000677063	UIMC1	5	51720		X2HRIP110	RAP80
SUB1	-0.339157	550.699	435.329	0.0222071	SUB1	5	10923		P15	p14	MGC102747	PC4
PHF10	-0.339128	214.228	169.351	0.0201919	PHF10	6	55274		XAP135	FLJ10975	MGC111009
ROD1	-0.339042	1388.47	1097.67	0.00116841	ROD1	9	9991		DKFZp781I1117
RSBN1	-0.33831	306.967	242.801	0.0025245	RSBN1	1	54665		DKFZp781E21150	RP11-324J2.1	ROSBIN
POLB	-0.337767	712.687	563.925	5.83281e-05	POLB	8	5423		MGC125976
C1orf19	-0.337733	893.389	706.925	0.000453696	C1ORF19	1	116461		sen15
MAOA	-0.337469	182.969	144.806	0.0413632	MAOA	X	4128
HLX	-0.337313	235.48	186.386	0.00523673	HLX	1	3142		HB24	HLX1
LSM6	-0.337287	281.92	223.148	0.00753467	LSM6	4	11157		YDR378C
RAN	-0.337052	4490.78	3555.16	0.0103371	RAN	12	5901
BST1	-0.33691	179.896	142.43	0.0285394	BST1	4	683		CD157
DERA	-0.336786	2355.31	1864.94	2.03141e-05	DERA	12	51071		DEOC	CGI-26
SR140	-0.336565	515.558	408.283	0.000245427	SR140	3	23350		KIAA0332	MGC133197
CSNK1G1	-0.336415	310.66	246.045	0.00792775	CSNK1G1	15	53944
C17orf58	-0.336411	405.693	321.312	0.0267921	C17ORF58	17	284018		MGC138278
SNRPB2	-0.3363	2509.43	1987.65	0.00156174	SNRPB2	20	6629		MGC45309	MGC24807
CKAP5	-0.336171	1639.42	1298.65	0.00349182	CKAP5	11	9793		KIAA0097	TOGp	FLJ35359	TOG	ch-TOG
ZBTB33	-0.336039	646.325	512.028	0.000105897	ZBTB33	X	10009		ZNF348	ZNF-kaiso
CCDC138	-0.336007	182.282	144.409	0.02923	CCDC138	2	165055		FLJ32745
IPO8	-0.335415	245.547	194.61	0.00555601	IPO8	12	10526		FLJ26580	RANBP8
NCOA5	-0.335305	373.134	295.752	0.000608233	NCOA5	20	57727		CIA	bA465L10.6
SNORD56	-0.33527	172.243	136.526	0.0365421	SNORD56	20	26793		RNU56	U56
ARID2	-0.334443	191.167	151.613	0.0335747	ARID2	12	196528		KIAA1557	FLJ30619	DKFZp686G052	DKFZp779P0222	p200	BAF200
CCDC16	-0.334401	516.686	409.791	0.013736	CCDC16	17	91603		MGC20398
ZW10	-0.333947	770.204	611.052	0.0150524	ZW10	11	9183		MGC149821	KNTC1AP	HZW10
PLEKHA5	-0.333889	209.358	166.103	0.025585	PLEKHA5	12	54477		KIAA1686	PEPP2	FLJ10667	FLJ31492
SFRP1	-0.333707	11803.6	9366.1	0.0196913	SFRP1	8	6422		FRP	FrzA	SARP2	FRP1	FRP-1
PVRL3	-0.333557	3533.05	2803.75	0.00158041	PVRL3	3	25945		PRR3	PPR3	DKFZP566B0846	CDw113	CD113	PVRR3	FLJ90624	nectin-3
MMACHC	-0.332874	221.255	175.666	0.0172926	MMACHC	1	25974		RP11-291L19.3	FLJ25671	DKFZp564I122
TBC1D20	-0.332863	368.175	292.316	0.0257413	TBC1D20	20	128637		FLJ45119	C20orf140
B3GALTL	-0.332852	204.226	162.148	0.0272351	B3GALTL	13	145173		B3Glc-T	B3GTL	Gal-T	beta3Glc-T
ARGLU1	-0.332678	1634.51	1297.9	0.0133594	ARGLU1	13	55082		FLJ10154	RP11-297I6.1	DKFZp686O08106
CBX1	-0.331776	434.395	345.152	0.00263379	CBX1	17	10951		M31	HP1Hs-beta	CBX	HP1-BETA	MOD1
FAM102B	-0.331605	280.686	223.048	0.00404485	FAM102B	1	284611		DKFZp686N01110	DKFZp779B126
KPNB1	-0.331517	9258.1	7357.42	2.52959e-05	KPNB1	17	3837		IPOB	NTF97	MGC2157	Impnb	MGC2155	IMB1	MGC2156
GLE1	-0.331366	581.679	462.309	0.0146265	GLE1	9	2733		hGLE1
PSMA2	-0.331088	316.407	251.524	0.0474867	PSMA2	7	5683		HC3	MU	PSC2	PMSA2
INSIG2	-0.330987	297.523	236.528	0.0435316	INSIG2	2	51141		MGC26273
KIAA0586	-0.330899	369.521	293.784	0.000770591	KIAA0586	14	9786		Talpid3
NUBP1	-0.330738	327.582	260.47	0.00140106	NUBP1	16	4682		MGC130053	NBP1	MGC117406	NBP	MGC130052
UHMK1	-0.330208	413.931	329.25	0.000741149	UHMK1	1	127933		Kist	KIS
SH3BP1	-0.330132	214.613	170.717	0.024135	SH3BP1	22	23616
MTERFD1	-0.33009	687.037	546.529	0.000442089	MTERFD1	8	51001		FLJ10939	CGI-12
DNAJC9	-0.330045	2101.44	1671.72	0.0437808	DNAJC9	10	23234		JDD1	KIAA0974	SB73	HDJC9
CCDC77	-0.329639	496.261	394.892	0.000256056	CCDC77	12	84318		MGC13183
TOR3A	-0.329086	279.012	222.105	0.0296125	TOR3A	1	64222		FLJ22345	ADIR	MGC111104	ADIR2
PLEKHG3	-0.329021	234.755	186.883	0.00859389	PLEKHG3	14	26030		MGC156299	KIAA0599	MGC156300
ERI1	-0.328991	522.108	415.647	0.0141358	ERI1	8	90459		MGC35395	3'HEXO
STARD8	-0.328657	193.231	153.865	0.0240398	STARD8	X	9754		DKFZp686H1668	KIAA0189	STARTGAP3	DLC3
MTHFS	-0.328531	341.464	271.924	0.00496881	MTHFS	15	10588		HsT19268
FAM193A	-0.328128	400.946	319.381	0.0117183	FAM193A	4	8603		RES4-22
RBM10	-0.327422	1086.84	866.163	0.00760836	RBM10	X	8241		DXS8237E	KIAA0122	ZRANB5	MGC1132	MGC997	GPATC9	GPATCH9
SGTB	-0.32728	181.726	144.843	0.0333563	SGTB	5	54557		SGT2	FLJ39002
PRRX1	-0.327246	1048.78	835.938	0.0106329	PRRX1	1	5396		PRX1	PMX1	PHOX1
CALM3	-0.326731	11089.1	8841.76	3.45162e-05	CALM3	19	808		PHKD	PHKD3
BUD13	-0.326443	289.757	231.082	0.00640629	BUD13	11	84811		MGC13125
HEATR1	-0.326343	856.464	683.078	8.88803e-05	HEATR1	1	55127		MGC72083	FLJ10359	RP11-385F5.3	BAP28
CNOT8	-0.326281	362.712	289.296	0.0128486	CNOT8	5	9337		hCAF1	POP2	CAF1	CALIF
CEBPG	-0.326262	396.527	316.27	0.000700658	CEBPG	19	1054		GPE1BP	IG/EBP-1
MCOLN2	-0.326013	190.837	152.238	0.0386999	MCOLN2	1	255231		TRP-ML2	TRPML2	FLJ36691
GSG2	-0.325669	172.752	137.843	0.0436653	GSG2	17	83903
DTNA	-0.325544	179.101	142.923	0.0301479	DTNA	18	1837		D18S892E	DTN	LVNC1	DRP3
NGDN	-0.324699	470.772	375.895	0.0318391	NGDN	14	25983		LCP5	C14orf120	lpd-2	NGD	DKFZP564O092
SPIN1	-0.324542	479.782	383.131	0.000372243	SPIN1	9	10927		SPIN
BATF3	-0.324512	196.412	156.848	0.034958	BATF3	1	55509		JUNDM1	SNFT	BATF3
DHX8	-0.324334	183.476	146.536	0.0339961	DHX8	17	1659		PRP22	PRPF22	HRH1	DDX8
THOC7	-0.324263	3767.97	3009.5	7.05155e-05	THOC7	3	80145		FLJ23445	NIF3L1BP1
SLC2A3	-0.323943	2553.71	2040.12	0.00227195	SLC2A3	12	6515		GLUT3	FLJ90380
RYBP	-0.323541	550.117	439.602	0.000256069	RYBP	3	23429		DEDAF	YEAF1	AAP1
SNORA12	-0.323458	287.115	229.449	0.031147	SNORA12	10	677800		U108
XPO5	-0.323335	307.626	245.861	0.00255055	XPO5	6	57510		FLJ45606	FLJ14239	FLJ32057	KIAA1291
LIPT1	-0.323304	187.644	149.972	0.0314926	LIPT1	2	51601		MGC13378	MGC12290
GK5	-0.323179	329.579	263.435	0.0365489	GK5	3	256356		MGC40579	FLJ45739	FLJ33582
ZNF830	-0.32314	184.003	147.079	0.0399915	ZNF830	17	91603		MGC20398
GART	-0.322484	485.647	388.368	0.00737654	GART	21	2618		PAIS	AIRS	PRGS	GARS	PGFT	GARTF	MGC47764
HOXA6	-0.322299	195.496	156.356	0.037792	HOXA6	7	3203		HOX1B	HOX1.2	HOX1
CCNT1	-0.322071	193.042	154.418	0.0384304	CCNT1	12	904		CYCT1	CCNT
ZNF148	-0.322008	1290.02	1031.95	0.0482795	ZNF148	3	7707		HT-BETA	ZBP-89	BFCOL1	BERF-1	ZFP148	pHZ-52
LOC203547	-0.321921	1400.15	1120.12	0.0414276	LOC203547	X	203547		MGC131652	MGC125516	MGC125514
PATL1	-0.321867	974.057	779.278	0.0014853	PATL1	11	219988		FLJ36874	MGC125671	MGC125672
C5orf34	-0.321819	200.374	160.311	0.0183817	C5ORF34	5	375444		MGC46448	FLJ32363
SNORA11D	-0.321475	257.853	206.347	0.00667829	SNORA11D	X	100124541
CYorf15A	-0.321425	173.451	138.809	0.0466623	CYORF15A	Y	246126		MGC131732	FLJ33216
LOC100134259	-0.321359	228.688	183.022	0.0201242	LOC100134259	2	100134259
STOML2	-0.321308	2887.81	2311.24	5.38797e-05	STOML2	9	30968		HSPC108	SLP-2
ATL3	-0.32126	1388.77	1111.53	0.0422408	ATL3	11	25923		ATL3	DKFZp564J0863
UBTD2	-0.321142	270.992	216.912	0.0229489	UBTD2	5	92181		MGC30022	DCUBP	DC-UbP
C17orf85	-0.321107	311.025	248.962	0.00745676	C17ORF85	17	55421		ELG	HSA277841
FOXRED1	-0.320705	349.499	279.836	0.0146638	FOXRED1	11	55572		FP634	H17
ALG12	-0.320682	178.431	142.869	0.0416603	ALG12	22	79087		ECM39	PP14673	hALG12	MGC3136	MGC111358
RBM4B	-0.320489	515.548	412.849	0.000502664	RBM4B	11	83759		RBM30	ZCRB3B	ZCCHC15	RBM4L	MGC10871
LOC441743	-0.320359	664.184	531.926	0.000191756	LOC441743		441743		rjd10	c367G8.3	RPL2B	RPL23AL
HDAC1	-0.319995	3408.37	2730.35	0.000246132	HDAC1	1	3065		GON-10	DKFZp686H12203	HD1	RPD3	RPD3L1
MIR155HG	-0.319929	222.903	178.57	0.0146558	MIR155HG	21	114614
PAPD1	-0.319922	528.966	423.762	0.00205352	PAPD1	10	55149		mtPAP	RP11-305E6.3	FLJ10486
TTLL4	-0.319842	190.13	152.324	0.0317443	TTLL4	2	9654		KIAA0173
BRD7	-0.319671	672.894	539.158	0.000193546	BRD7	16	29117		CELTIX1	NAG4	BP75
ZNF26	-0.319332	241.185	193.296	0.0100567	ZNF26	12	7574		KOX20	FLJ20755
DCLRE1A	-0.319264	187.292	150.111	0.0388078	DCLRE1A	10	9937		SNM1	KIAA0086	PSO2
ZNF193	-0.3192	261.543	209.631	0.0066922	ZNF193	6	7746		ZSCAN9	PRD51
ZBTB24	-0.318996	274.751	220.248	0.00528708	ZBTB24	6	9841		ZNF450	BIF1	PATZ2
RBM12B	-0.318477	299.923	240.513	0.00347394	RBM12B	8	389677		MGC:33837
MBIP	-0.318463	379.51	304.338	0.0442612	MBIP	14	51562
MRPL35	-0.318343	835.916	670.396	0.00339487	MRPL35	2	51318
CPOX	-0.317424	448.102	359.603	0.0016672	CPOX	3	1371		CPO	HCP	CPX
HRH1	-0.317232	256.321	205.725	0.0215447	HRH1	3	3269		hisH1	H1-R
PCNT	-0.316379	687.133	551.825	0.00787493	PCNT	21	5116		PCNT2	PCN	PCTN2	KEN	PCNTB
THUMPD1	-0.315937	517.75	415.923	0.0196421	THUMPD1	16	55623		DKFZp686C1054
TMEM155	-0.315831	213.247	171.32	0.0201939	TMEM155	4	132332		FLJ30834
C9orf64	-0.315472	258.487	207.717	0.0218417	C9ORF64	9	84267		MGC10999	RP11-575L7.5
WDR40A	-0.315471	506	406.615	0.000539069	WDR40A	9	25853		MGC1058	DKFZP434O125	DKFZp434O125	TCC52	KIAA1892
SFRS1	-0.314691	3634.89	2922.54	8.06522e-05	SFRS1	17	6426		SRp30a	SF2	SF2p33	MGC5228	ASF
NFXL1	-0.314057	261.211	210.112	0.00797253	NFXL1	4	152518		HOZFP	FLJ16294
NPM3	-0.313837	1243.2	1000.15	0.00927616	NPM3	10	10360		PORMIN	TMEM123
NPIP	-0.313807	286.456	230.459	0.00751979	NPIP	16	9284
CNOT6	-0.313737	246.553	198.365	0.0106889	CNOT6	5	57472		KIAA1194	CCR4
SC65	-0.313391	680.351	547.511	0.0023723	SC65	17	10609		NOL55
MAP3K5	-0.31319	664.75	535.031	0.000281911	MAP3K5	6	4217		MEKK5	ASK1	MAPKKK5
KCTD6	-0.312777	436.227	351.202	0.00140854	KCTD6	3	200845		MGC27385
ARL17P1	-0.312685	180.576	145.389	0.0465942	ARL17P1	17	51326		ARF1P2	ARL17A
HAUS8	-0.31249	294.247	236.943	0.0185943	HAUS8	19	93323		MGC20533
ORC1L	-0.312373	194.25	156.433	0.0340195	ORC1L	1	4998		HSORC1	ORC1	PARC1
B3GALNT1	-0.312316	202.954	163.449	0.03188	B3GALNT1	3	8706		galT3	P1	B3GALT3	GLCT3	P	Gb4Cer	GLOB	beta3Gal-T3
CCDC47	-0.31231	273.155	219.985	0.00680548	CCDC47	17	57003		MSTP041	GK001
YEATS4	-0.311942	467.057	376.241	0.00510707	YEATS4	12	8089		B230215M10Rik	GAS41	NUBI-1	YAF9	4930573H17Rik
ASTE1	-0.311772	227.656	183.411	0.0219948	ASTE1	3	28990		HT001	MGC129980
IL27RA	-0.311722	241.859	194.861	0.0124528	IL27RA	19	9466		zcytor1	WSX1	IL27R	TCCR	CRL1
H2AFV	-0.311544	192.269	154.926	0.0494186	H2AFV	7	94239		MGC1947	H2AV	MGC10831	FLJ26479	MGC10170
RFC1	-0.311474	388.125	312.758	0.011312	RFC1	4	5981		RECC1	RFC140	PO-GA	MHCBFB	MGC51786	A1	RFC
BEND6	-0.31142	243.253	196.025	0.0138136	BEND6	6	221336		bA203B9.1	FLJ30162
C3orf58	-0.311057	254.373	205.038	0.0144811	C3ORF58	3	205428		MGC33365
C2orf32	-0.311044	552.86	445.637	0.000486012	C2ORF32	2	25927		DKFZp566K1924
BRI3BP	-0.3108	212.012	170.923	0.041432	BRI3BP	12	140707		HCCR-2	BNAS1	KG19
XPO4	-0.310789	521.164	420.163	0.00598086	XPO4	13	64328		KIAA1721	FLJ13046
UBQLN2	-0.310672	1816.08	1464.24	0.00152614	UBQLN2	X	29978		PLIC-2	PLIC2	CHAP1/DSK2	RIHFB2157	N4BP4	CHAP1	HRIHFB2157	LIC-2	Dsk2
CAD	-0.310651	365.671	294.833	0.0214548	CAD	2	790
CTNNBL1	-0.310508	683.501	551.146	0.0195241	CTNNBL1	20	56259		C20orf33	NAP	P14L	NYD-SP19	dJ633O20.1	PP8304	FLJ21108
C6orf129	-0.310464	739.455	596.284	0.0342687	C6ORF129	6	154467		HSPC265	MGC131656
SRP9	-0.309985	6453.41	5205.64	0.000104841	SRP9	1	6726		ALURBP	MGC110981
TRIM28	-0.30995	1044.59	842.639	0.0123583	TRIM28	19	10155		FLJ29029	TIF1B	RNF96	TF1B	KAP1
MRPS9	-0.309945	759.025	612.284	0.00661124	MRPS9	2	64965		RPMS9
MIOS	-0.309275	523.252	422.289	0.0439395	MIOS	7	54468
ZNRD1	-0.309022	407.608	329.017	0.013735	ZNRD1	6	30834		hZR14	tctex-6	MGC13376	Rpa12	HTEX-6
PEX11A	-0.308468	198.055	159.929	0.0340742	PEX11A	15	8800		MGC138534	PEX11-ALPHA	MGC119947
SNORD68	-0.308356	296.123	239.138	0.0309986	SNORD68	16	606500		HBII-202
UTP14A	-0.307983	629.899	508.813	0.00389728	UTP14A	X	10813		NY-CO-16	KIAA0266	dJ537K23.3	SDCCAG16
BP75	-0.307953	229.191	185.138	0.0226492	BP75	6	23629
CASP6	-0.307549	366.345	296.012	0.0232027	CASP6	4	839		MCH2
GAR1	-0.30727	937.918	757.997	0.0107954	GAR1	4	54433		GAR1
PIAS1	-0.306648	539.052	435.833	0.0434534	PIAS1	15	8554		MGC141879	MGC141878	GU/RH-II	GBP	ZMIZ3	DDXBP1
TRIM21	-0.306545	324.448	262.341	0.0312546	TRIM21	11	6737		RNF81	RO52	SSA1	SSA
GAS1	-0.306198	175.77	142.157	0.0472568	GAS1	9	2619
GLO1	-0.305988	3514.65	2842.96	0.00150564	GLO1	6	2739		GLYI	GLOD1
C12orf4	-0.305874	366.468	296.455	0.0300908	C12ORF4	12	57102		FLJ23899	FLJ21158
NUDT11	-0.305818	550.035	444.969	0.00393025	NUDT11	X	55190		FLJ10628	DIPP3beta	DIPP3b	ASP1	hDIPP3beta
CALR	-0.305809	2967.58	2400.73	0.000145381	CALR	19	811		FLJ26680	cC1qR	RO	SSA
MAP3K12	-0.305766	233.991	189.302	0.0263087	MAP3K12	12	7786		DLK	ZPKP1	ZPK	MUK
PNN	-0.305752	647.535	523.87	0.0134879	PNN	14	5411		SDK3	DRS	memA	pinin
PIGK	-0.305697	754.108	610.112	0.00263485	PIGK	1	10026		MGC22559	GPI8
LOC644615	-0.305456	408.327	330.412	0.0498638	LOC644615	12	644615
SCLY	-0.304851	185.62	150.264	0.0487734	SCLY	2	51540		SCL
SMYD4	-0.304696	275.274	222.865	0.00846071	SMYD4	17	114826		KIAA1936	ZMYND21
SNHG1	-0.304406	1058.22	856.925	0.000242552	SNHG1	11	23642		U22HG	UHG
RPA2	-0.304358	1328.47	1075.8	0.00140409	RPA2	1	6118		REPA2	RPA32
TPM4	-0.304182	3202.36	2593.59	0.00759562	TPM4	19	7171
CNIH4	-0.304037	2581.68	2091.11	0.000165796	CNIH4	1	29097		HSPC163
TSGA14	-0.304021	546.029	442.279	0.00246687	TSGA14	7	95681		Cep41	DKFZp762H1311
ZMYM3	-0.303807	213.435	172.906	0.023193	ZMYM3	X	9203		ZNF261	DXS6673E	XFIM	MYM	KIAA0385	ZNF198L2
HCFC1	-0.303483	2213.11	1793.27	0.000177914	HCFC1	X	3054		HFC1	MGC70925	VCAF	HCF-1	CFF	HCF1
IER3	-0.303273	2178.12	1765.18	0.000180567	IER3	6	8870		IEX-1L	PRG1	IEX1	GLY96	DIF-2	IEX-1	DIF2
TLN2	-0.30296	244.067	197.837	0.0275971	TLN2	15	83660		KIAA0320	ILWEQ	DKFZp451B1011	DKFZp686K0979	DKFZp686I0976
OSBPL6	-0.302955	189.917	153.945	0.00616726	OSBPL6	2	114880		ORP6	MGC59642	FLJ36583
APITD1	-0.302921	348.618	282.594	0.00231656	APITD1	1	378708		MGC32686	CENP-S	CENPS
NDUFA12	-0.302883	4552.48	3690.38	0.00311126	NDUFA12	12	55967		DAP13	B17.2
UBE2O	-0.30248	275.506	223.396	0.011837	UBE2O	17	63893		E2-230K	KIAA1734	FLJ12878
ILF3	-0.302446	650.227	527.254	0.000145274	ILF3	19	3609		NF-AT-90	NFAR-1	NFAR	MPHOSPH4	TCP80	MMP4	DRBF	NF90	MPP4	DRBP76
M6PR	-0.302322	1271.18	1030.86	0.00233926	M6PR	12	4074		SMPR	FLJ32994	CD-MPR	MPR46
MYLIP	-0.301935	311.544	252.714	0.00543031	MYLIP	6	29116		MIR
MLPH	-0.301532	306.672	248.831	0.00698546	MLPH	2	79083		SLAC2-A	MGC59733	MGC2771
TPR	-0.301513	591.867	480.241	0.0201468	TPR	1	7175
NUDT3	-0.301509	697.517	565.968	0.000542145	NUDT3	6	11165		DIPP1	DIPP
EXOSC9	-0.301212	1507.71	1223.62	0.00121056	EXOSC9	4	5393		p5	PMSCL1	PM/Scl-75	p6	Rrp45p	RRP45
SDSL	-0.301057	226.78	184.068	0.022431	SDSL	12	113675		SDS-RS1
IRAK2	-0.301049	322.305	261.603	0.00960366	IRAK2	3	3656		IRAK-2	MGC150550
ASXL1	-0.300822	416.854	338.398	0.001842	ASXL1	20	171023		MGC71111	KIAA0978	MGC117280
MRPL30	-0.300787	318.602	258.644	0.0438811	MRPL30	2	51263		MGC3314	MGC24095	FLJ44438	RPML28	MRP-L28
CASP2	-0.300497	684.333	555.66	0.0132127	CASP2	7	835		NEDD2	ICH1	ICH-1L/1S	CASP-2	ICH-1L
FZD7	-0.300324	878.109	713.086	0.00695348	FZD7	2	8324		FzE3
WDSUB1	-0.300214	321.346	260.975	0.00508374	WDSUB1	2	151525		FLJ36175	WDSAM1	UBOX6
PGM1	-0.299554	1286.44	1045.24	0.0324257	PGM1	1	5236
TNFRSF14	-0.299235	221.179	179.749	0.0262914	TNFRSF14	1	8764		HVEM	HVEA	ATAR	LIGHTR	TR2
SAE1	-0.299088	7934.85	6449.18	0.00020602	SAE1	19	10055		SUA1	AOS1	HSPC140	FLJ3091
CCDC89	-0.298725	200.778	163.226	0.0400842	CCDC89	11	220388		FLJ38159
LOC285074	-0.29851	424.812	345.411	0.0019111	LOC285074	2	285074
MYC	-0.298324	725.757	590.183	0.00367998	MYC	8	4609		c-Myc
C7orf44	-0.297722	1539.12	1252.13	0.00150246	C7ORF44	7	55744		FLJ10803
URB2	-0.297469	327.296	266.314	0.00523692	URB2	1	9816
NOL11	-0.297339	1231.89	1002.46	0.0490556	NOL11	17	25926		DKFZP586L0724
ZNF775	-0.297238	270.167	219.864	0.0144773	ZNF775	7	285971		MGC33584
NUP160	-0.296976	488.968	397.999	0.0126973	NUP160	11	23279		MGC150679	MGC150678
TBL1X	-0.296369	987.793	804.359	0.00357485	TBL1X	X	6907		EBI	TBL1
ATF2	-0.296349	203.46	165.68	0.0400556	ATF2	2	1386		MGC111558	CRE-BP1	HB16	CREB2	TREB7
ACTR8	-0.296315	276.809	225.414	0.0109128	ACTR8	3	93973		FLJ12934	ARP8	FLJ22579
THOC2	-0.296076	571.219	465.237	0.00912267	THOC2	X	57187		CXorf3	dJ506G2.1	THO2
SETD2	-0.295766	1005.82	819.384	0.000414194	SETD2	3	29072		HSPC069	FLJ23184	KMT3A	KIAA1732	FLJ22472	HYPB	HIF-1	FLJ45883	FLJ16420
COMMD2	-0.29462	630.639	514.152	0.0134686	COMMD2	3	51122		HSPC042	MGC57611
SNRPC	-0.294573	2555.72	2083.72	0.00476267	SNRPC	6	6631		FLJ20302
CNRIP1	-0.294273	714.524	582.682	0.0120871	CNRIP1	2	25927		DKFZp566K1924	CRIP1	C2orf32
CXorf64	-0.294003	388.696	317.034	0.0264506	CXORF64	X	100130613
FGD1	-0.293816	422.022	344.261	0.0027118	FGD1	X	2245		ZFYVE3	AAS	FGDY
RPL30	-0.293543	16000.3	13054.5	0.0167407	RPL30	8	6156
ZCCHC11	-0.293415	318.522	259.904	0.0309796	ZCCHC11	1	23318		PAPD3
SMARCA5	-0.29317	877.771	716.355	0.0434979	SMARCA5	4	8467		hSNF2H	ISWI	SNF2H	WCRF135	hISWI
MECP2	-0.293113	200.943	163.998	0.0452195	MECP2	X	4204		AUTSX3	RTT	DKFZp686A24160	PPMX	RTS	MRX79	MRX16
XRCC5	-0.292488	1036.95	846.663	0.0325939	XRCC5	2	7520		Ku86	KARP1	FLJ39089	KARP-1	NFIV	KU80	KUB2
DHX9	-0.292428	423.83	346.069	0.0228487	DHX9	1	1660		NDH II	LKP	NDHII	DDX9	RHA
YWHAQ	-0.29198	12436.7	10158	0.0179287	YWHAQ	2	10971		HS1	14-3-3	1C5
BTBD12	-0.291864	359.371	293.551	0.00455355	BTBD12	16	84464		KIAA1987	KIAA1784
EXOSC10	-0.291325	1168.02	954.445	0.00594357	EXOSC10	1	5394		PMSCL2	PM-Scl	PM/Scl-100	PMSCL	RRP6	p4	Rrp6p	p2	p3
KIAA1267	-0.290144	514.231	420.548	0.000862811	KIAA1267	17	284058		MGC102843	DKFZP727C091	DKFZp686P06109
HPS3	-0.289034	284.542	232.883	0.0123501	HPS3	3	84343		SUTAL	DKFZp686F0413	FLJ22704
C1orf109	-0.288394	377.47	309.077	0.00531965	C1ORF109	1	54955		FLJ20508
HNRNPL	-0.287885	915.895	750.211	0.000692091	HNRNPL	19	3191		P/OKcl.14	FLJ35509	hnRNP-L	HNRPL
XPO7	-0.287741	539.639	442.064	0.00206701	XPO7	8	23039		KIAA0745	RANBP16
PTK7	-0.287301	401.574	329.063	0.0191594	PTK7	6	5754		CCK4
ZNF823	-0.287283	222.05	181.957	0.0348747	ZNF823	19	55552		HSZFP36
LOXL4	-0.287223	659.597	540.525	0.00112362	LOXL4	10	84171		FLJ21889	LOXC
TBC1D16	-0.287076	287.7	235.788	0.0300079	TBC1D16	17	125058		FLJ20748	MGC25062
RDBP	-0.28694	388.746	318.631	0.00621997	RDBP	6	7936		RDP	NELF-E	D6S45	RD
ADHFE1	-0.28671	223.879	183.529	0.0415296	ADHFE1	8	137872		HOT	FLJ32430	ADH8	MGC48605	HMFT2263
ALKBH2	-0.28662	223.969	183.615	0.0342687	ALKBH2	12	121642		ABH2	MGC90512	hABH2
CRTC3	-0.286559	633.871	519.683	0.001842	CRTC3	15	64784		TORC3	FLJ21868
CTNNAL1	-0.286419	1589.12	1302.97	0.00091671	CTNNAL1	9	8727		CLLP	alpha-CATU
MTF2	-0.285565	347.593	285.173	0.0248274	MTF2	1	22823		dJ976O13.2	PCL2	M96	RP5-976O13.1
WDR75	-0.284834	1119.8	919.176	0.00842771	WDR75	2	84128		FLJ12519	DKFZp781N1244
ATP11C	-0.28434	374.909	307.845	0.010461	ATP11C	X	286410		ATPIQ	ATPIG
C1orf77	-0.284166	913.65	750.304	0.000845629	C1ORF77	1	26097		MGC86949	RP1-178F15.2	MGC131924	pp7704	DKFZP547E1010
FRG1	-0.284091	1155.24	948.755	0.000701392	FRG1	4	2483		FSG1	FRG1A
THOC3	-0.28351	488.341	401.216	0.0238911	THOC3	5	84321		TEX1	MGC5469
TTLL5	-0.283369	250.612	205.92	0.0385915	TTLL5	14	23093		KIAA0998	STAMP	MGC117189
MSL3	-0.283174	236.213	194.116	0.0144402	MSL3	X	10943		DKFZP586J1822
PPP1CC	-0.283117	3875.25	3184.74	0.0391085	PPP1CC	12	5501		PPP1G
RPL21	-0.282935	9898.89	8136.06	0.0426404	RPL21	13	6144		MGC71252	FLJ27458	DKFZp686C06101	MGC104274	MGC104275	L21
SMC6	-0.282901	261.386	214.842	0.0363857	SMC6	2	79677		FLJ22116	SMC6L1	FLJ35534
RPS21	-0.281853	2817.62	2317.59	0.0343372	RPS21	20	6227
DVL2	-0.281631	280.363	230.643	0.0164097	DVL2	17	1856
CTDSP2	-0.281201	1647.92	1356.08	0.000692091	CTDSP2	12	10106		SCP2	OS4	PSR2
ZKSCAN2	-0.280616	245.591	202.18	0.0280848	ZKSCAN2	16	342357		ZNF694	ZSCAN31	FLJ23199
ZZZ3	-0.280137	754.369	621.232	0.0130748	ZZZ3	1	26009		DKFZP564I052	FLJ10362	DKFZp313N0119
C11orf41	-0.280088	369.135	303.997	0.00848596	C11ORF41	11	25758		MGC34830	G2	FLJ36988	C11orf69
CIRH1A	-0.279961	1904.88	1568.88	0.0110966	CIRH1A	16	84916		TEX292	KIAA1988	CIRHIN	FLJ14728	NAIC
SF3B2	-0.279802	1914.49	1576.97	0.0300911	SF3B2	11	10992		SAP145	SF3b1	SF3b150	SF3B145
ZNF318	-0.279657	330.574	272.323	0.0133809	ZNF318	6	24149		ZFP318	TZF	HRIHFB2436
ZNF766	-0.279349	241.507	198.993	0.0485493	ZNF766	19	90321
RNF219	-0.278972	636.82	524.853	0.0017923	RNF219	13	79596		DKFZp686N15250	DKFZp686O03173	DKFZp686A01276	FLJ13449	FLJ25774
ZNF35	-0.278935	305.349	251.668	0.0131407	ZNF35	3	7584		Zfp105	HF.10	HF10
INTS9	-0.278909	642.857	529.852	0.00177372	INTS9	8	55756		RC74	FLJ10871	RC-74	CPSF2L
C13orf37	-0.278803	831.379	685.285	0.00125123	C13ORF37	13	440145		MGC150539	FLJ21869
NMB	-0.278552	311.069	256.451	0.0124528	NMB	15	4828		MGC2277	MGC3936	MGC17211
SP1	-0.278275	452.653	373.247	0.0312569	SP1	12	6667
CEP192	-0.278247	485.293	400.169	0.00324085	CEP192	18	55125
SAP130	-0.278092	488.192	402.603	0.00757298	SAP130	2	79595		FLJ12761
WBP4	-0.277856	692.323	571.039	0.0113581	WBP4	13	11193		FBP21	MGC117310
NACAP1	-0.277655	758.774	625.936	0.0217366	NACAP1	8	83955		FKSG17
TMEM39A	-0.277245	221.416	182.705	0.0492794	TMEM39A	3	55254		FLJ10902
COX7A2	-0.27721	11282.8	9310.41	0.000719789	COX7A2	6	1347		MGC118950	MGC118952	COX7AL	MGC126875	COX7AL1	MGC126877	MGC118951	COXVIIa-L
UPF3B	-0.276934	429.932	354.842	0.0137218	UPF3B	X	65109		UPF3X	RENT3B	MRXS14	HUPF3B
CEBPZ	-0.276607	2119.08	1749.36	0.000832193	CEBPZ	2	10153		NOC1	CBF2	HSP-CBF
C16orf63	-0.276484	1432.37	1182.56	0.0366003	C16ORF63	16	123811		FLJ31153	DKFZp686N1651
WBP11	-0.276037	1659.09	1370.17	0.000919642	WBP11	12	51729		SIPP1	NPWBP	DKFZp779M1063
NUP153	-0.276018	531.115	438.631	0.00291182	NUP153	6	9972		HNUP153	N153
SMYD2	-0.275982	650.709	537.413	0.00396763	SMYD2	1	56950		HSKM-B	MGC119305	ZMYND14	KMT3C
C18orf55	-0.275655	1244.92	1028.4	0.00566503	C18ORF55	18	29090		HSPC154
TAF1B	-0.275548	470.156	388.413	0.0252947	TAF1B	2	9014		RAF1B	SL1	RAFI63	TAFI63	MGC:9349
CGGBP1	-0.275279	680.178	562.025	0.00259303	CGGBP1	3	8545		CGGBP	p20-CGGBP
CYP4V2	-0.275006	251.121	207.538	0.0300911	CYP4V2	4	285440		BCD	MGC43534	CYP4AH1
HNRNPUL2	-0.274615	821.779	679.34	0.00157328	HNRNPUL2	11	221092		DKFZp762N1910
EHD4	-0.274271	1122.93	928.518	0.0305496	EHD4	15	30844		PAST4
ADIPOR2	-0.274132	827.736	684.495	0.0309179	ADIPOR2	12	79602		MGC4640	ACDCR2	PAQR2	FLJ21432
TMEM48	-0.274046	348.096	287.874	0.0274873	TMEM48	1	55706		FLJ12556	NDC1	NET3	FLJ34120	FLJ10407	RP4-654H19.1
TMEM138	-0.273924	521.493	431.31	0.00341892	TMEM138	11	51524		HSPC196
GPT2	-0.273541	329.524	272.61	0.0121563	GPT2	16	84706		ALT2
AP4B1	-0.272715	456.479	377.855	0.00482102	AP4B1	1	10717		BETA-4
DUS4L	-0.272545	309.163	255.943	0.0154523	DUS4L	7	11062		PP35	MGC133233	DUS4
FNTB	-0.272299	369.661	306.079	0.00876071	FNTB	14	2342		MGC31935	FPTB
GALNT2	-0.270696	259.833	215.381	0.0299956	GALNT2	1	2590		GalNAc-T2
GNB1L	-0.270587	250.683	207.812	0.0340213	GNB1L	22	54584		GY2	DGCRK3	WDR14	KIAA1645	WDVCF	FKSG1
ASAP1	-0.270416	2404.77	1993.74	0.00594696	ASAP1	8	50807		ZG14P	AMAP1	PAG2	ASAP1	PAP	CENTB4	KIAA1249
PLCG1	-0.269714	516.323	428.282	0.0121476	PLCG1	20	5335		PLC1	PLCgamma1	PLC148	PLC-II
SIX5	-0.269511	283.395	235.105	0.0229121	SIX5	19	147912		DMAHP	BOR2
NOL8	-0.268695	517.835	429.839	0.0268032	NOL8	9	55035		FLJ20736	bA62C3.3	Nop132	C9orf34	bA62C3.4	DKFZp686P12242
ZFP106	-0.268588	833.857	692.211	0.0289454	ZFP106	15	64397		ZNF474	FLJ45841	DKFZp451A239	FLJ34610	SH3BP3
DDX55	-0.268538	622.732	516.968	0.0461473	DDX55	12	57696		MGC33209	FLJ16577	KIAA1595
DAXX	-0.267599	425.335	353.326	0.00846501	DAXX	6	1616		MGC126246	BING2	MGC126245	DAP6
KIRREL	-0.267248	309.888	257.487	0.0259609	KIRREL	1	55243		MGC129542	FLJ10845	MGC129543	NEPH1
CPSF3	-0.266567	1342.89	1116.34	0.00771367	CPSF3	2	51692		CPSF	CPSF73	CPSF-73
PIR	-0.266272	395.517	328.859	0.00177474	PIR	X	8544
DNAJC8	-0.265417	3690.98	3070.74	0.00761519	DNAJC8	1	22826		HSPC331	SPF31
IRF1	-0.265252	484.286	402.952	0.0328407	IRF1	5	3659		IRF-1	MAR
LSM3	-0.265227	3147.37	2618.82	0.00411423	LSM3	3	27258		USS2	YLR438C	SMX4
C2orf44	-0.264645	541.503	450.749	0.0343798	C2ORF44	2	80304		FLJ21945	PP384
ZFP91	-0.264423	1543.1	1284.68	0.00147473	ZFP91	11	80829		PZF	FKSG11	ZNF757
ELF4	-0.264193	532.194	443.139	0.00494089	ELF4	X	2000		MEF	ELFR
GULP1	-0.263543	267.475	222.817	0.0472393	GULP1	2	51454		CED-6	FLJ31156	GULP	CED6
RBM23	-0.263042	1125.44	937.86	0.0047429	RBM23	14	55147		MGC4458	PP239	RNPC4	CAPERbeta	FLJ10482
TEX10	-0.262857	564.286	470.296	0.0152316	TEX10	9	54881		RP11-208F1.2	FLJ20287	bA208F1.2
MRPS23	-0.262594	674.418	562.187	0.0360886	MRPS23	17	51649		HSPC329	MRP-S23	CGI-138
RPL26	-0.262419	9658	8051.77	0.0189277	RPL26	17	6154
ZC3H4	-0.261642	773.408	645.129	0.0031693	ZC3H4	19	23211		C19orf7	KIAA1064
ANGPTL2	-0.261152	373.397	311.57	0.0128673	ANGPTL2	9	23452		ARP2	MGC8889	HARP
ZNF609	-0.260237	294.947	246.267	0.0265348	ZNF609	15	23060		KIAA0295
EML4	-0.259699	1075.01	897.913	0.0146816	EML4	2	27436		FLJ10942	C2orf2	ELP120	DKFZp686P18118	ROPP120	FLJ32318
KAT2A	-0.259221	414.426	346.269	0.0105359	KAT2A	17	2648		hGCN5	GCN5	KAT2A	MGC102791	PCAF-b
CCDC102A	-0.258945	324.162	270.901	0.020674	CCDC102A	16	92922		MGC13119	MGC10992
DNAJC25	-0.258673	358.635	299.767	0.0156246	DNAJC25	9	548645
REV1	-0.258227	338.601	283.109	0.0186456	REV1	2	51455		MGC163283	MGC26225	FLJ21523	REV1L
MTMR2	-0.257996	266.876	223.174	0.0306557	MTMR2	11	8898		KIAA1073	CMT4B1	CMT4B
C20orf72	-0.257548	596.551	499.02	0.00542517	C20ORF72	20	92667		bA504H3.4	FLJ14597
ADNP2	-0.25749	529.107	442.62	0.0158634	ADNP2	18	22850		KIAA0863	ZNF508
EBNA1BP2	-0.257084	5798.81	4852.32	0.00335347	EBNA1BP2	1	10969		P40	NOBP	EBP2
SNRPB	-0.257069	3887.99	3253.42	0.0147188	SNRPB	20	6628		snRNP-B	COD	SNRPB1	SmB/SmB'
HSPH1	-0.256874	2806.59	2348.83	0.0368023	HSPH1	13	10808		HSP105B	DKFZp686M05240	HSP105	HSP105A	NY-CO-25	KIAA0201
TCF4	-0.255788	540.718	452.868	0.00837722	TCF4	18	6925		SEF2	ITF2	MGC149723	SEF2-1A	MGC149724	SEF2-1B	PTHS	SEF2-1	E2-2
LGTN	-0.254367	578.44	484.938	0.00997617	LGTN	1	1939		HCA56
MFAP1	-0.254259	560.968	470.325	0.00688758	MFAP1	15	4236
SH3GL1	-0.254214	465.598	390.378	0.0120729	SH3GL1	19	6455		SH3P8	MGC111371	CNSA1	EEN	SH3D2B
RAD51C	-0.253962	342.725	287.406	0.0333915	RAD51C	17	5889		MGC104277	RAD51L2
JAGN1	-0.251751	322.209	270.616	0.0264866	JAGN1	3	84522
C18orf10	-0.251658	1267.44	1064.56	0.000262755	C18ORF10	18	25941		L17	DKFZP586M1523	HsT3006	PGs2	HMFN0601	DKFZp586M1523
SFRS4	-0.251473	2719.16	2284.2	0.00304449	SFRS4	1	6429		SRP75
ZCCHC9	-0.251185	1034.93	869.556	0.00411423	ZCCHC9	5	84240		DKFZp761J139
ODF2	-0.251095	346.44	291.099	0.0209704	ODF2	9	4957		ODF84	MGC9034	ODF2/1	MGC111096	ODF2/2	FLJ44866
PCM1	-0.250585	1028.05	864.132	0.034992	PCM1	8	5108		PTC4
WHAMM	-0.250287	267.68	225.046	0.0481528	WHAMM	15	123720		KIAA1971
SRGAP1	-0.250193	478.217	402.077	0.0124608	SRGAP1	12	57522		ARHGAP13	KIAA1304	FLJ22166
DAB2	-0.24988	3152.69	2651.3	0.0195355	DAB2	5	1601		FLJ26626	DOC2	DOC-2
TINP1	-0.249189	4544.03	3823.2	0.00975996	TINP1	5	10412		NSA2	HCL-G1	YR-29	CDK105
OSBPL8	-0.248996	742.114	624.475	0.0160674	OSBPL8	12	114882		MSTP120	ORP8	MST120	MGC126578	DKFZp686A11164	OSBP10	MGC133203
ZBTB9	-0.248953	371.587	312.693	0.019867	ZBTB9	6	221504		MGC23166
CHCHD3	-0.248588	591.355	497.755	0.00808636	CHCHD3	7	54927		FLJ20420
RBM15	-0.248386	397.853	334.928	0.0291262	RBM15	1	64783		OTT	FLJ12479	SPEN	OTT1	FLJ21943	MGC119584
HMBOX1	-0.248146	278.735	234.689	0.0442593	HMBOX1	8	79618		FLJ21616	HNF1LA	PBHNF
SFRS2	-0.246251	5551.72	4680.57	0.045878	SFRS2	17	6427		PR264	SC-35	SRp30b	SC35	SFRS2A
FBXW7	-0.245591	220.761	186.205	0.00818432	FBXW7	4	55294		DKFZp686F23254	AGO	FBXW6	SEL-10	CDC4	FBX30	SEL10	FBW7
FANCE	-0.245352	454.597	383.503	0.0144811	FANCE	6	2178		FAE	FACE
TSPAN6	-0.244992	268.951	226.946	0.0306621	TSPAN6	X	7105		T245	TSPAN-6	TM4SF6
C14orf156	-0.243978	10562.9	8919.43	0.004206	C14ORF156	14	81892		DC50	SLIRP	PD04872
ZNF337	-0.243347	376.695	318.226	0.023337	ZNF337	20	26152
LSM14A	-0.242829	1193.65	1008.74	0.00566783	LSM14A	19	26065		RAP55	C19orf13	FAM61A	DKFZP434D1335
ZNF217	-0.242095	348.553	294.707	0.0453831	ZNF217	20	7764		ZABC1
TUBGCP4	-0.241629	299.821	253.586	0.0434241	TUBGCP4	15	27229		GCP4	FLJ14797	76P
NOLC1	-0.241343	298.868	252.83	0.0440689	NOLC1	10	9221		P130	NOPP140	KIAA0035	NOPP130	NS5ATP13
ABHD10	-0.241225	317.184	268.346	0.0379825	ABHD10	3	55347		FLJ11342
PDIA5	-0.240856	370.833	313.815	0.0361035	PDIA5	3	10954		FLJ30401	PDIR
ANAPC1	-0.240828	494.413	418.402	0.0180419	ANAPC1	2	64682		TSG24	MCPR	APC1
DCAKD	-0.240586	1132.71	958.73	0.0138568	DCAKD	17	79877		FLJ22955
DGCR8	-0.240396	389.037	329.325	0.0490797	DGCR8	22	54487		Gy1	DGCRK6	C22orf12
TMEM98	-0.240394	1240.14	1049.79	0.0220781	TMEM98	17	26022		DKFZP564K1964
EFHD2	-0.23989	2908.13	2462.63	0.0317443	EFHD2	1	79180		MGC4342	RP3-467K16.3
ABCB10	-0.239389	462.63	391.896	0.0174704	ABCB10	1	23456		EST20237	M-ABC2	MTABC2
HS3ST3A1	-0.239139	2531.05	2144.44	0.0496263	HS3ST3A1	17	9955		3OST3A1	30ST3A1
MATR3	-0.238887	1415.69	1199.65	3.97156e-05	MATR3	5	9782		DKFZp686K23100	DKFZp686K0542	KIAA0723	MGC9105
MPHOSPH10	-0.238772	805.932	683.001	0.0252765	MPHOSPH10	2	10199		MPP10P	MPP10
HMGN1	-0.238116	7131.07	6046.09	0.0334891	HMGN1	21	3150		FLJ31471	MGC104230	MGC117425	FLJ27265	HMG14
CYB5A	-0.23804	690.378	585.369	0.015058	CYB5A	18	1528		MCB5	CYB5
C5orf35	-0.237566	299.152	253.733	0.0489619	C5ORF35	5	133383		MGC33648
KIAA1712	-0.23709	448.845	380.825	0.0469347	KIAA1712	4	80817		PS1TP3
ACIN1	-0.236127	794.053	674.168	0.0099083	ACIN1	14	22985		ACINUS	KIAA0670	ACN	DKFZp667N107
CPD	-0.235407	848.713	720.935	0.0240611	CPD	17	1362
RPL39	-0.235342	15762	13389.6	0.00637754	RPL39	X	6170
IRS1	-0.234371	1514.09	1287.06	0.00773108	IRS1	2	3667		HIRS-1
LIX1L	-0.234275	446.265	379.375	0.0358784	LIX1L	1	128077		DKFZp762F237	MGC46719
CDC42BPA	-0.23303	300.653	255.81	0.00868597	CDC42BPA	1	8476		DKFZp686L1738	PK428	DKFZp686P1738	KIAA0451	FLJ23347	MRCK	MRCKA
SENP7	-0.231685	195.922	166.855	0.0490889	SENP7	3	57337		KIAA1707	MGC157730
ZNF532	-0.231346	384.245	327.315	0.0360653	ZNF532	18	55205		FLJ10697
ZNF770	-0.229472	427.899	364.975	0.0429213	ZNF770	15	54989		FLJ20582	PRO1914
LCMT2	-0.228892	432.449	369.005	0.0287011	LCMT2	15	9836		TYW4	PPM2	KIAA0547	MGC9534
SSBP1	-0.228382	3876.36	3308.83	0.00906156	SSBP1	7	6742		SSBP
MID1IP1	-0.228088	676.991	577.992	0.0331619	MID1IP1	X	58526		THRSPL	MIG12	STRAIT11499	FLJ10386	G12-like
MTMR11	-0.225087	408.819	349.763	0.0464314	MTMR11	1	10903		CRA	RP11-212K13.1
GTPBP6	-0.224818	1940.78	1660.73	0.0365093	GTPBP6	Y	8225		FLJ90047	FLJ22809	PGPL	FLJ20977
PPARBP	-0.224093	638.304	546.473	0.0403968	PPARBP	17	5469		TRIP2	PPARGBP	RB18A	MGC71488	MED1	CRSP200	TRAP220	CRSP1	PBP	DRIP205	DRIP230
LYRM1	-0.222457	936.686	802.838	0.0157079	LYRM1	16	57149		A211C6.1
MPDZ	-0.22236	660.437	566.102	0.0409266	MPDZ	9	8777		FLJ25909	DKFZp781P216	FLJ34626	MUPP1	FLJ90240
FAM53C	-0.221669	836.751	717.575	0.0173776	FAM53C	5	51307		C5orf6
BASP1	-0.221445	10021.4	8595.42	0.016937	BASP1	5	10409		CAP-23	NAP22	CAP23	MGC8555	NAP-22
INTS3	-0.220243	747.032	641.268	0.0365863	INTS3	1	65123		FLJ44849	C1orf193	INT3	FLJ21919	C1orf60	DKFZp781I1253	DKFZp686O20115	RP11-216N14.2	DKFZp686E1950
NOP56	-0.220028	1118.81	960.555	0.0159908	NOP56	20	10528		NOP56
APEX2	-0.218823	728.24	625.752	0.0215291	APEX2	X	27301		XTH2	APEXL2	APE2
POLR1E	-0.218288	1022.76	879.153	0.0260192	POLR1E	9	64425		FLJ13390	FLJ13970	RP11-405L18.3	PRAF1	PAF53
PPP1R10	-0.218095	513.082	441.096	0.0319369	PPP1R10	6	5514		CAT53	FB19	PNUTS
LYAR	-0.217914	1117.31	960.667	0.0170013	LYAR	4	55646		ZLYAR	FLJ20425
STK40	-0.21789	1119.6	962.659	0.0174698	STK40	1	83931		SgK495	SHIK	RP11-268J15.4	MGC4796
YARS2	-0.21364	925.815	798.385	0.0225546	YARS2	12	51067		FLJ13995	CGI-04	mt-TyrRS	TYRRS
CLEC16A	-0.21315	701.127	604.829	0.0276128	CLEC16A	16	23274		KIAA0350	Gop-1	MGC111457
PRRC1	-0.212654	1018.24	878.688	0.0224073	PRRC1	5	133619		FLJ32875
COQ5	-0.212103	1131.23	976.57	0.027554	COQ5	12	84274		MGC4767	MGC104303
TMEM101	-0.211637	549.501	474.526	0.0477633	TMEM101	17	84336		FLJ23987	MGC4251
ZMYND19	-0.209254	506.521	438.133	0.0437169	ZMYND19	9	116225		MIZIP	RP11-48C7.4
RUFY3	-0.208595	296.531	256.612	0.0406062	RUFY3	4	22902		KIAA0871	SINGAR1	RIPX
GFM1	-0.20509	619.765	537.637	0.0407827	GFM1	3	85476		FLJ12662	EFG	GFM	FLJ20773	COXPD1	hEFG1	EFG1	EGF1	FLJ13632	EFGM
FTHL7	-0.204148	18881.4	16390	0.0328814	FTHL7	13	2500
TYK2	-0.203576	961.192	834.695	0.0326126	TYK2	19	7297		JTK1
PAK2	-0.203541	978.596	849.828	6.03426e-06	PAK2	3	5062		PAK65	PAKgamma
SEC61G	-0.20286	11764.9	10221.6	0.0460023	SEC61G	7	23480		SSS1
ATP5J2	-0.183485	4242.72	3736.03	0.0418591	ATP5J2	7	9551		ATP5JL
RPS15A	-0.174939	11344.5	10049	2.33234e-05	RPS15A	16	6210		S15a	FLJ27457	MGC111208
ATG16L1	-0.150089	503.226	453.504	0.0418766	ATG16L1	2	55054		ATG16L	APG16L	IBD10	WDR30	FLJ00045	FLJ10035	FLJ10828	FLJ22677
KIAA0101	-0.141265	6912.48	6267.71	0.00804815	KIAA0101	15	9768		L5	p15(PAF)	OEATC1	OEATC-1	NS5ATP9
FGF5	-0.122387	807.97	742.255	0.0311492	FGF5	4	2250		HBGF-5	Smag-82
FST	-0.120963	6425.89	5909.08	3.11678e-08	FST	5	10468		FS
SF3B1	-0.0745024	621.841	590.543	0.0228791	SF3B1	2	23451		PRP10	SF3b155	SAP155	PRPF10
PPP2CA	-0.0359735	4125.01	4023.42	0.04563	PPP2CA	5	5515		PP2CA	RP-C	PP2Ac
LAMP2	0.0748195	1408.66	1483.64	0.00643988	LAMP2	X	3920		CD107b	LAMP-2C	LAMPB
NEDD8	0.114442	7382.05	7991.48	0.0345327	NEDD8	14	4738		Nedd-8	MGC125896	MGC104393	MGC125897
TAGLN	0.128133	10595	11579	0.0471721	TAGLN	11	6876		TAGLN1	WS3-10	SM22	DKFZp686P11128	SMCC
SEZ6L2	0.137462	162.462	178.703	0.045775	SEZ6L2		26470		FLJ90517	PSK-1
CLIC4	0.156865	2582.69	2879.34	0.0484362	CLIC4	1	25932		p64H1	CLIC4L	H1	FLJ38640	DKFZP566G223	huH1
KLF6	0.168506	2365.13	2658.16	0.00916433	KLF6	10	1316		GBF	ZF9	ST12	CPBP	BCD1	PAC1	DKFZp686N0199	COPEB
UBE3C	0.169303	1578.29	1774.81	0.0307337	UBE3C	7	9690		KIAA10	KIAA0010
PECI	0.17323	1951.15	2200.08	0.0242248	PECI	6	10455		DRS1	KIAA0536	HCA88	dJ1013A10.3	ACBD2
SEC13	0.177628	1586.38	1794.24	0.0441139	SEC13	3	6396
C19orf62	0.179492	976.728	1106.13	0.0395618	C19ORF62	19	29086		HSPC142	FLJ20571
SLC35E1	0.1831	819.486	930.379	0.00223961	SLC35E1	19	79939		MGC44954	FLJ14251
ABHD12	0.183152	756.44	858.833	0.00418102	ABHD12	20	26090		DKFZP434P106	dJ965G21.2	C20orf22	ABHD12A	BEM46L2
ANAPC5	0.191631	2122.43	2423.93	0.0485493	ANAPC5	12	51433		APC5	PDL-108
ERGIC3	0.192864	1860.33	2126.42	0.00678325	ERGIC3	20	51614		Erv46	NY-BR-84	dJ477O4.2	C20orf47	PRO0989	CGI-54	SDBCAG84
TRIOBP	0.193653	1055.16	1206.73	0.000929881	TRIOBP	22	11078		TARA	FLJ39315	KIAA1662	dJ37E16.4	HRIHFB2122	DFNB28
NCSTN	0.196074	2481.08	2842.27	0.0410154	NCSTN	1	23385		APH2	RP11-517F10.1	KIAA0253
PUF60	0.197946	2649.52	3039.17	0.0382927	PUF60	8	22827		FIR	RoBPI	SIAHBP1	FLJ31379	PUF60
JTB	0.198447	5957.67	6836.21	0.0380063	JTB	1	10899		B PAR	PAR	HJTB	hJT	HSPC222
MYCBP2	0.203001	704.952	811.463	0.0414276	MYCBP2	13	23077		FLJ21597	PAM	FLJ13826	FLJ10106	FLJ21646	DKFZp686M08244	KIAA0916
TPD52L2	0.204911	1903.91	2194.48	0.0167253	TPD52L2	20	7165		D54	hD54	DKFZp686A1765
MGST3	0.205688	3892.75	4489.26	0.0284656	MGST3	1	4259		GST-III
C1orf53	0.206314	529.503	610.907	0.044834	C1ORF53	1	388722
PSCD2	0.208178	272.664	314.989	0.0458908	PSCD2	19	9266		CTS18	PSCD2L	Sec7p-L	ARNO	CTS18.1	SEC7L	Sec7p-like
LHFP	0.210681	989.028	1144.54	0.0302149	LHFP	13	10186
TOR1A	0.212841	960.456	1113.14	0.0255765	TOR1A	9	1861		DYT1	DQ2	torsin A
HTRA2	0.215182	326.437	378.944	0.0210325	HTRA2	2	27429		PARK13	OMI	PRSS25
BIRC2	0.217898	1752.47	2038.19	0.0421417	BIRC2	11	329		API1	Hiap-2	MIHB	RNF48	HIAP2	cIAP1
RBM42	0.217955	1411.21	1641.36	0.0485832	RBM42	19	79171		MGC10433
C5orf15	0.218762	1749.48	2035.93	0.018569	C5ORF15	5	56951		HTGN29	KCT2
AMD1	0.21978	1112.61	1295.7	0.0235491	AMD1	6	262		ADOMETDC	AMD	DKFZp313L1234	FLJ26964
NSFL1C	0.220384	536.212	624.71	0.0217092	NSFL1C	20	55968		UBXD10	p47	MGC3347	dJ776F14.1	UBX1
ARFGAP1	0.220648	354.2	412.734	0.0162227	ARFGAP1	20	55738		ARF1GAP	HRIHFB2281	MGC39924
CTNNA1	0.220965	4658.36	5429.39	0.00481813	CTNNA1	5	1495		CAP102	FLJ36832
SBDSP	0.221087	940.104	1095.8	0.0187474	SBDSP	7	155370
RAI14	0.221439	6878.04	8019.08	0.0184576	RAI14	5	26064		KIAA1334	RAI13	DKFZp564G013	NORPEG
KLHL36	0.221551	554.302	646.308	0.0254385	KLHL36	16	79786		FLJ12543
OAT	0.222176	1336.51	1559.03	0.00250912	OAT	10	4942		HOGA	DKFZp781A11155
TCF25	0.222207	1600.82	1867.38	0.0157122	TCF25	16	22980		hKIAA1049	NULP1	PRO2620	Hulp1	FKSG26	KIAA1049
TMEM159	0.222363	200.415	233.812	0.029638	TMEM159	16	57146
SBDS	0.223261	1535.83	1792.88	0.0151746	SBDS	7	51119		FLJ10917	SWDS	CGI-97	SDS
ACOT11	0.223918	163.965	191.495	0.0425338	ACOT11	1	26027		BFIT2	BFIT1	THEA	THEM1	BFIT	KIAA0707	STARD14
C7orf30	0.224282	2597.37	3034.23	0.0439982	C7ORF30	7	115416
DDX24	0.225489	1265.36	1479.43	0.0254184	DDX24	14	57062
MYL12A	0.226178	12472.9	14590	0.0124115	MYL12A	18	10627		MLCB	MRLC3
TAX1BP1	0.226211	2338.65	2735.66	0.0424413	TAX1BP1	7	8887		TXBP151	T6BP	CALCOCO3
MED19	0.22645	1037.34	1213.64	0.0335314	MED19	11	219541		LCMR1
VKORC1	0.226673	3217.72	3765.16	4.15506e-05	VKORC1	16	79001		MST134	EDTP308	IMAGE3455200	VKCFD2	FLJ00289	MST576	MGC2694	VKOR
TMEM219	0.226967	785.516	919.346	0.0160805	TMEM219	16	124446
RAB3GAP1	0.227935	1905.03	2231.09	0.0288015	RAB3GAP1	2	22930		RAB3GAP	RAB3GAP130	P130	DKFZp434A012	KIAA0066	WARBM1
RNU6-1	0.228286	4194.72	4913.87	0.0414241	RNU6-1	15	26827		U6
CYB5R3	0.228983	7905.35	9265.14	0.00339487	CYB5R3	22	1727		DIA1	B5R
FBXL2	0.229783	372.634	436.973	0.0312569	FBXL2	3	25827		FBL2	FBL3	DKFZP564P0622
CCDC109A	0.229883	378.248	443.587	0.0304487	CCDC109A	10	90550		FLJ46135	C10orf42
ADIPOR1	0.230562	775.016	909.32	0.0337897	ADIPOR1	1	51094		ACDCR1	TESBP1A	CGI-45	PAQR1	FLJ42464	FLJ25385	CGI45
RAB2B	0.23191	1602.55	1882.02	0.0111445	RAB2B	14	84932		FLJ14824
NAAA	0.232657	263.13	309.176	0.0389504	NAAA	4	27163		PLT	NAAA
ACTN1	0.232931	8083.77	9500.21	0.0136821	ACTN1	14	87		FLJ40884
TMED9	0.234539	3095.03	3641.4	0.00883654	TMED9	5	54732		HSGP25L2G
HPS6	0.235206	1244.68	1465.09	0.00961315	HPS6	10	79803		RP11-302K17.1	FLJ22501	MGC20522
C2orf28	0.235212	2442.87	2875.45	0.00199161	C2ORF28	2	51374		HSPC013	APR--3	APR3	APR-3	PRO240	p18
ITGAE	0.235253	1949.44	2294.71	0.0419983	ITGAE	17	3682		HUMINAE	CD103	MGC141996
DCTD	0.235282	1337.99	1575	0.0167716	DCTD	4	1635		MGC111062
VWA5A	0.235711	185.133	217.992	0.0366173	VWA5A	11	4013		BCSC-1	BCSC1
TCIRG1	0.235861	279.193	328.78	0.00448424	TCIRG1	11	10312		ATP6N1C	OC-116kDa	OPTB1	ATP6V0A3	OC116	a3	Stv1	Vph1	Atp6i	TIRC7
MPRIP	0.236178	1971.74	2322.45	0.0134657	MPRIP	17	23164		p116Rip	RHOIP3	KIAA0864
KIAA0556	0.236298	362.547	427.068	0.0431777	KIAA0556	16	23247
HCCS	0.236766	315.128	371.331	0.0196302	HCCS	X	3052		MCOPS7	DKFZp779I1858	CCHL
SEC14L1	0.237399	298.534	351.931	0.0403857	SEC14L1	17	6397		SEC14L	DKFZp686C06176
PTTG1IP	0.238135	4953.31	5842.27	0.0332676	PTTG1IP	21	754		C21orf3	C21orf1	PBF
ALDH2	0.2384	326.288	384.916	0.0299686	ALDH2	12	217		ALDM	ALDH-E2	ALDHI	MGC1806
ADRM1	0.238719	2205.85	2602.78	0.0161347	ADRM1	20	11047		Rpn13	GP110	MGC29536
DCTN5	0.239818	773.869	913.818	0.00960366	DCTN5	16	84516		MGC3248	p25
ANXA6	0.240446	513.48	606.603	0.015797	ANXA6	5	309		ANX6	CBP68
CKB	0.241256	1092.53	1291.39	0.0453284	CKB	14	1152		B-CK	CKBB
UTP14C	0.241572	522.143	617.32	0.0125872	UTP14C	13	9724		UTP14B	KIAA0266	MGC104971	2700066J21Rik
PPP2R1A	0.241582	4108.63	4857.59	0.00639036	PPP2R1A	19	5518		PR65A	MGC786
NOSIP	0.24166	2839.14	3356.86	0.00646356	NOSIP	19	51070		CGI-25
ENDOG	0.242354	366.342	433.353	0.0243423	ENDOG	9	2021		FLJ27463
GNA11	0.242655	1140.54	1349.45	0.0159914	GNA11	19	2767		GNA-11
ARMC10	0.243811	610.706	723.147	0.0165541	ARMC10	7	83787		SVH	MGC3195	PNAS-112
SH3GLB1	0.244123	1676.55	1985.66	0.0130834	SH3GLB1	1	51100		dJ612B15.2	Bif-1	CGI-61	KIAA0491
C20orf24	0.244278	5262.94	6233.95	0.0498329	C20ORF24	20	55969		PNAS-11	RIP5
EIF3K	0.244972	3071.71	3640.19	0.00678364	EIF3K	19	27335		eIF3k	PTD001	PRO1474	MSTP001	PLAC24	ARG134	EIF3S12	HSPC029	PLAC-24	M9
C19orf56	0.245429	2220.41	2632.18	0.00556158	C19ORF56	19	51398		PTD008
COPS7A	0.246807	3105.15	3684.5	0.0173776	COPS7A	12	50813		MGC110877
ODC1	0.247344	2508.46	2977.59	0.0153753	ODC1	2	4953
PIK3IP1	0.248075	539.817	641.098	0.0438407	PIK3IP1	22	113791		HGFL	hHGFL(S)	MGC17330
SLC31A2	0.24832	369.262	438.618	0.0311346	SLC31A2	9	1318		hCTR2	CTR2	COPT2
NRSN2	0.248438	427.909	508.322	0.0126915	NRSN2	20	80023		FLJ23329	dJ1103G7.6	C20orf98
ATP2B4	0.248786	1441.27	1712.53	0.00700337	ATP2B4	1	493		DKFZp686M088	PMCA4b	DKFZp686G08106	PMCA4x	PMCA4	ATP2B2	MXRA1
TMEM150A	0.24912	376.721	447.726	0.0195389	TMEM150A	2	129303		TM6P1	FLJ90024
SLC25A39	0.250735	1971.1	2345.24	0.00442126	SLC25A39	17	51629		CGI-69	CGI69	FLJ22407
STAM	0.250897	628.208	747.534	0.0361106	STAM	10	8027		DKFZp686J2352	STAM1
ACO2	0.250946	538.441	640.737	0.0397557	ACO2	22	50		MGC20605	ACONM	MGC33908
SLMAP	0.251517	659.651	785.287	0.0065236	SLMAP	3	7871		MGC138761	MGC138760	FLJ42206	SLAP	KIAA1601
NMRAL1	0.251693	799.986	952.465	0.00560586	NMRAL1	16	57407		FLJ25918	HSCARG
KCTD10	0.251849	1240.91	1477.59	0.00458738	KCTD10	12	83892		MSTP028	FLJ41739	ULRO61
EEF1G	0.252099	6100.91	7265.81	0.00787681	EEF1G	11	1937		EF1G	GIG35
TGFBR2	0.252179	1557.34	1854.79	0.0347539	TGFBR2	3	7048		RIIC	MFS2	HNPCC6	TAAD2	AAT3	TGFR-2	FAA3	TGFbeta-RII
NEO1	0.252634	1234.16	1470.36	0.00961351	NEO1	15	4756		NGN	HsT17534
LSM10	0.253125	855.859	1020	0.00505039	LSM10	1	84967		MST074	MSTP074	MGC15749
SLC16A4	0.253173	226.861	270.378	0.011508	SLC16A4	1	9122		MCT5	MCT4
ADCY7	0.253617	241.359	287.746	0.0384649	ADCY7	16	113		KIAA0037	FLJ36387
KIAA0141	0.254423	346.37	413.17	0.0421328	KIAA0141	5	9812
SERF2	0.254618	3230	3853.45	1.67808e-18	SERF2	15	10169		4F5REL	H4F5rel	FLJ37527	FLJ38557	FAM2C	MGC48826	HsT17089	FLJ20431
C21orf33	0.256813	581.156	694.386	0.0100819	C21ORF33	21	8209		ES1	GT335	HES1	KNP-I	KNPH	KNPI	D21S2048E
DPP3	0.25737	325.444	389.002	0.0479868	DPP3	11	10072		FLJ11387	DPPIII	FLJ22331
DOLK	0.257731	595.129	711.534	0.00551567	DOLK	9	22845		SEC59	DK	KIAA1094	DK1	TMEM15
TCTA	0.257761	275.466	329.353	0.028815	TCTA	3	6988
NEIL2	0.257855	304.738	364.375	0.0180222	NEIL2	8	252969		FLJ31644	MGC4505	MGC2832	NEH2
ANO10	0.258144	573.756	686.177	0.0232419	ANO10	3	55129		FLJ10375	MGC47890
EPHA2	0.258225	437.429	523.168	0.00826888	EPHA2	1	1969		ECK
YRDC	0.258601	1016.75	1216.36	0.00528317	YRDC	1	79693		FLJ23476	IRIP	FLJ26165	RP11-109P14.4	SUA5	DRIP3
ADA	0.258611	253.108	302.8	0.0289859	ADA	20	100
PSMC4	0.259159	743.524	889.836	0.0026287	PSMC4	19	5704		MIP224	MGC23214	TBP7	MGC13687	S6	MGC8570
POLR3A	0.259615	517.927	620.041	0.0118146	POLR3A	10	11128		RPC155	hRPC155	RPC1
C3orf10	0.259758	1215.77	1455.62	0.00554776	C3ORF10	3	55845		MDS027	HSPC300	hHBrk1
TIMM22	0.25994	706.458	845.934	0.00916215	TIMM22	17	29928		TIM22	TEX4
ARPC1B	0.260398	463.034	554.626	0.0123501	ARPC1B	7	10095		p41-ARC	ARC41	p40-ARC
IGF2R	0.260628	2647.23	3171.38	0.00407065	IGF2R	6	3482		M6P-R	CD222	MPRI	MPR1	CIMPR
ATP5F1	0.261221	3553.91	4259.33	0.0126449	ATP5F1	1	515		PIG47	MGC24431
BIVM	0.261284	601.124	720.473	0.0195016	BIVM	13	54841		MGC133326
CLIP3	0.261844	2123.59	2546.21	0.002559	CLIP3	19	25999		RSNL1	CLIPR-59	CLIPR59	FLJ33413	DKFZp586N1922
PRDX6	0.261894	6969	8356.19	0.00241791	PRDX6	1	9588		p29	MGC46173	PRX	AOP2	aiPLA2	1-Cys	KIAA0106	NSGPx
CCDC106	0.263159	495.709	594.902	0.00560586	CCDC106	19	29903		ZNF581	HSU79303
PPP2R5B	0.263197	237.164	284.629	0.0305435	PPP2R5B	11	5526		FLJ35411	B56B	PR61B
KCTD5	0.263956	1334.53	1602.46	0.00251982	KCTD5	16	54442		FLJ20040
MGST2	0.263986	592.268	711.191	0.00956835	MGST2	4	4258		MGC14097	MGST-II	GST2	FLJ27438
DHX38	0.264104	358.014	429.935	0.0231981	DHX38	16	9785		DDX38	PRPF16	PRP16	KIAA0224
LRFN3	0.264192	513.629	616.849	0.0463598	LRFN3	19	79414		FIGLER1	MGC2656	SALM4
PEA15	0.264909	6764.7	8128.2	0.00343265	PEA15	1	8682		HUMMAT1H	PEA-15	PED	MAT1	MAT1H	HMAT1
TMEM87A	0.265119	2757.44	3313.71	0.00212685	TMEM87A	15	25963		DKFZP564G2022
PRDX2	0.265867	658.296	791.508	0.042184	PRDX2	19	7001		TDPX1	MGC4104	TSA	PRP	PRX2	NKEFB	PRXII
XYLT2	0.266582	1515.1	1822.6	0.014164	XYLT2	17	64132		XT2	XT-II	xylT-II
SNX3	0.266609	5949.01	7156.52	0.0354321	SNX3	6	8724		SDP3	SNX3A	MGC17570	Grd19
GRB2	0.267753	617.954	743.974	0.00449368	GRB2	17	2885		MST084	ASH	MSTP084	EGFRBP-GRB2	Grb3-3
ZDHHC12	0.268117	372.972	449.146	0.00828633	ZDHHC12	9	84885		MGC13153	MGC54050	ZNF400	FLJ14524
FTO	0.268304	336.059	404.747	0.0405475	FTO	16	79068		KIAA1752	MGC5149
PDCD6	0.268322	2102.99	2532.86	0.0211908	PDCD6	5	10016		ALG-2	MGC111017	MGC9123	PEF1B	MGC119050
SOD1	0.269546	11390.7	13730.6	0.00165853	SOD1	21	6647		ALS1	IPOA	SOD	homodimer	ALS
NAP1L5	0.269851	558.368	673.215	0.00344059	NAP1L5	4	266812		DRLM
SGSM2	0.269958	1123.61	1354.81	0.00827059	SGSM2	17	9905		KIAA0397	RUTBC1	SGSM2
CMAS	0.270309	967.687	1167.1	0.000242175	CMAS	12	55907
NDEL1	0.271151	1307.1	1577.37	0.0387036	NDEL1	17	81565		DKFZp451M0318	EOPA	NUDEL	MITAP1
CXorf12	0.271506	222.85	268.995	0.049823	CXORF12	X	8269		ITBA1	DXS9878E
EXOC7	0.271591	894.567	1079.87	0.0252082	EXOC7	17	23265		Exo70p	2-5-3p	DKFZp686J04253	FLJ40965	EXO70	YJL085W	FLJ46415	EXOC1	EX070
COPZ2	0.272387	418.693	505.7	0.007088	COPZ2	17	51226		MGC23008
NECAP2	0.273227	1017.17	1229.26	0.00611736	NECAP2	1	55707		FLJ10420	RP4-798A10.1
POMT1	0.273683	304.567	368.188	0.0313577	POMT1	9	10585		FLJ37239	LGMD2K	RT
RAB5C	0.273881	1035.35	1251.8	0.00888255	RAB5C	17	5878		RAB5CL	RABL	MGC138857	MGC117217
FAM82A2	0.274041	1234.06	1492.21	0.00158272	FAM82A2	15	55177		ptpip51	RMD3	hRMD-3	FLJ10579
PGCP	0.274122	340.207	411.399	0.013918	PGCP	8	10404
ACOT9	0.274385	863.687	1044.61	0.021947	ACOT9	X	23597		MT-ACT48	CGI-16	ACATE2
EFEMP2	0.274792	2940.3	3557.23	0.00178052	EFEMP2	11	30008		UPH1	FBLN4	MBP1
SPPL2A	0.27496	1358.05	1643.19	0.0102848	SPPL2A	15	84888		PSL2	IMP3
RAB4A	0.275089	290.62	351.67	0.0215367	RAB4A	1	5867		RAB4
TMEM2	0.275344	570.186	690.087	0.0448585	TMEM2	9	23670
CYB561D2	0.276867	391.386	474.188	0.00474457	CYB561D2	3	11068		TSP10	101F6
HSD17B12	0.277416	2299.1	2786.56	0.000223792	HSD17B12	11	51144		KAR
FLJ35258	0.277456	453.077	549.154	0.00436597	FLJ35258	19	284297
NUMB	0.27801	1470.86	1783.45	0.039761	NUMB	14	8650		S171
ETHE1	0.278292	191.052	231.7	0.0404052	ETHE1	19	23474		YF13H12	HSCO
SLC25A28	0.278573	855.404	1037.6	0.00151447	SLC25A28	10	81894		MRS4L	MFRN2	DKFZp547C109	NPD016	MRS3/4
MRPL12	0.278636	1116.12	1353.91	0.0216441	MRPL12	17	6182		MRP-L31/34	L12mt	5c5-2	MRPL7/L12	MRPL7	MGC8610	RPML12
LMBR1	0.278715	401.216	486.721	0.00641291	LMBR1	7	64327		PPD2	DIF14	ACHP	FLJ11665	TPT	C7orf2
GAK	0.278717	1548.3	1878.26	0.00117182	GAK	4	2580		MGC99654	FLJ40395
DHX29	0.279334	903.152	1096.1	0.0183006	DHX29	5	54505		DDX29	FLJ21492
RAB32	0.279447	2616.18	3175.33	0.00131983	RAB32	6	10981
C19orf50	0.280831	1725.92	2096.81	0.00102571	C19ORF50	19	79036		MSTP096	FLJ25480	MST096	MGC2749
FAM127B	0.281011	492.321	598.192	0.00662643	FAM127B	X	26071		MAR8A	DKFZp564B147	DKFZP564B147	MGC8471	CXX1b
SPRYD3	0.281226	480.341	583.723	0.00256921	SPRYD3	12	84926		FLJ14800
CHURC1	0.28181	494.183	600.788	0.0312546	CHURC1	14	91612		FLJ33064	chch	My015	C14orf52
FAM160B2	0.282911	296.897	361.218	0.037107	FAM160B2	8	64760		FLJ11125	FLJ21801	MGC138352
RPL23AP53	0.283083	355.057	432.03	0.0115658	RPL23AP53	8	644128
SERTAD3	0.283139	246.619	300.096	0.0098224	SERTAD3	19	29946		RBT1
TSPAN17	0.283146	1104.14	1343.57	0.0418651	TSPAN17	5	26262		FBX23	MGC14859	TM4SF17	FBXO23	MGC71255
SLC35A3	0.283967	434.735	529.306	0.041797	SLC35A3	1	23443		DKFZp781P1297
GRPEL1	0.285169	746.993	910.251	0.00121119	GRPEL1	4	80273		HMGE	FLJ25609
SNAPC2	0.285934	523.894	638.731	0.0360886	SNAPC2	19	6618		PTFdelta	SNAP45
FAR2	0.286426	190.656	232.527	0.0395402	FAR2	12	55711		FAR2	FLJ10462
TMEM185A	0.286741	277.065	337.987	0.0287915	TMEM185A	X	84548		FAM11A	MGC118845	CXorf13	MGC118844
C7orf25	0.287449	345.031	421.103	0.00414637	C7ORF25	7	79020		MGC2821	FLJ21167
PRMT2	0.287532	442.639	540.264	0.00835231	PRMT2	21	3275		HRMT1L1	MGC111373
RBM4	0.287805	544.344	664.525	0.00257594	RBM4	11	5936		ZCRB3A	ZCCHC21	RBM4A	LARK	MGC75138	DKFZp547K0918
C1orf86	0.287813	717.26	875.623	0.0288508	C1ORF86	1	199990		FP7162	RP11-181G12.3	MGC120153	FLJ31031
ZDHHC1	0.287913	215.744	263.396	0.0477132	ZDHHC1	16	29800		ZNF377	C16orf1	HSU90653
HABP4	0.288308	472.174	576.622	0.00715662	HABP4	9	22927		SERBP1L	IHABP4	MGC825	Ki-1/57
STK19	0.288825	374.135	457.06	0.0249829	STK19	6	8859		RP1	G11	D6S60	HLA-RP1	MGC117388	D6S60E
FAM98A	0.289096	2952.37	3607.42	0.00062147	FAM98A	2	25940		DKFZp686O03192	DKFZP564F0522
NDUFV1	0.289122	1325.21	1619.27	0.0165804	NDUFV1	11	4723		UQOR1
C12orf62	0.289826	407.151	497.739	0.0321182	C12ORF62	12	84987		MGC14288
NDUFB8	0.289844	5424.74	6631.79	0.0314063	NDUFB8	10	4714		ASHI	CI-ASHI
SLC25A43	0.290003	913.215	1116.54	0.0135275	SLC25A43	X	203427
ARL2BP	0.29014	1938.87	2370.78	0.000616145	ARL2BP	16	23568		BART1
MOGS	0.291458	238.94	292.433	0.0400556	MOGS	2	7841
LRFN4	0.292202	349.949	428.515	0.00680548	LRFN4	11	78999		SALM3	MGC3103
ITGB1	0.292458	5353.2	6556.21	0.0304029	ITGB1	10	3688		GPIIA	VLAB	MDF2	FNRB	CD29	MSK12
TAP1	0.292591	721.729	884	0.0266097	TAP1	6	6890		ABC17	PSF1	FLJ26666	ABCB2	TAP1N	APT1	D6S114E	RING4	FLJ41500	TAP1*0102N
LAMP1	0.29268	4559.99	5585.59	0.00102725	LAMP1	13	3916		LGP120	LAMPA	CD107a
TNFSF12	0.293198	524.171	642.295	0.00458395	TNFSF12	17	8742		DR3LG	APO3L	MGC20669	MGC129581	TWEAK
SRP14P1	0.293363	4655.06	5704.75	0.00539396	SRP14P1	12	390284
FBXW5	0.294274	392.08	480.795	0.0389585	FBXW5	9	54461		RP11-229P13.10	DKFZP434B205	Fbw5	MGC20962
KIAA0247	0.295529	332.439	408.014	0.00623242	KIAA0247	14	9766
C1orf50	0.295673	657.247	806.743	0.000804597	C1ORF50	1	79078		MGC955
PTDSS1	0.295815	1916.55	2352.71	0.0278616	PTDSS1	8	9791		PSSA	KIAA0024
RAB2A	0.29599	957.749	1175.85	0.0005755	RAB2A	8	5862		RAB2
CKAP4	0.296495	7537.18	9256.84	0.0014181	CKAP4	12	10970		p63	CLIMP-63	MGC99554	ERGIC-63
RNASEH1	0.296734	1239.01	1521.95	0.000488454	RNASEH1	2	246243		H1RNA
DRAM1	0.296793	1014.27	1245.94	0.0187739	DRAM1	12	55332		FLJ11259
PTS	0.29796	2382.49	2929.04	0.010419	PTS	11	5805		PTPS
ANO6	0.298252	674.497	829.398	0.000685839	ANO6	12	196527		MGC104751
TMEM42	0.298808	411.472	506.163	0.0315919	TMEM42	3	131616		MGC29956
LEMD2	0.299311	514.766	633.448	0.00420094	LEMD2	6	221496		dJ482C21.1
SHANK3	0.299413	251.003	308.895	0.0270238	SHANK3	22	85358		SPANK-2	PSAP2	PROSAP2	KIAA1650
TP53I13	0.299814	1195.2	1471.28	0.000419753	TP53I13	17	90313		DSCP1
PMPCA	0.300314	666.309	820.501	0.000917918	PMPCA	9	23203		Alpha-MPP	KIAA0123	MGC104197	INPP5E
MED24	0.300667	410.309	505.383	0.00417196	MED24	17	9862		THRAP4	CRSP100	DRIP100	CRSP4	TRAP100	MED24	ARC100	MGC8748	KIAA0130
DYNLRB1	0.301008	2304.54	2839.2	0.0332271	DYNLRB1	20	83658		BLP	ROBLD1	BITH	DNLC2A	DNCL2A
TNFRSF12A	0.301037	3360.18	4139.84	0.00230102	TNFRSF12A	16	51330		CD266	TWEAKR	FN14
MFAP5	0.301394	177.276	218.463	0.0289457	MFAP5	12	8076		MAGP2	MP25
EXTL1	0.301776	199.093	245.415	0.0336064	EXTL1	1	2134		MGC70794	EXTL
CCDC115	0.302137	586.495	723.13	0.019379	CCDC115	2	84317		ccp1	MGC12981	FLJ30131
BRMS1	0.302622	1309.67	1615.33	0.000918637	BRMS1	11	25855		DKFZp564A063
PQLC3	0.302645	698.648	861.714	0.0178282	PQLC3	2	130814		C2orf22	MGC33602
ISCA1	0.302676	349.29	430.825	0.00321117	ISCA1	9	81689		hIscA	RP11-507D14.2	HBLD2	ISA1	MGC4276
TMEM59	0.302737	4039.97	4983.23	0.00166162	TMEM59	1	9528		FLJ42977	C1orf8	HSPC001
HSPC171	0.302958	800.738	987.847	0.000796436	HSPC171		29100
PPA1	0.303762	4286.15	5290.65	0.000274716	PPA1	10	5464		PP1	IOPPP	MGC111556	PP	SID6-8061
SHARPIN	0.303792	289.962	357.925	0.0147317	SHARPIN	8	81858		SIPL1	DKFZP434N1923
RND3	0.304027	4378.33	5405.42	0.00239432	RND3	2	390		RhoE	Rho8	memB	ARHE
NEK6	0.304512	576.359	711.804	0.0217144	NEK6	9	10783		SID6-1512
PPME1	0.30465	1020.97	1261.02	0.0457244	PPME1	11	51400		FLJ22226	PME-1
DCAF6	0.304704	921.543	1138.26	0.0403141	DCAF6	1	55827		RP4-745I14.1	ARCAP	PC326	MSTP055	1200006M05Rik	NRIP
NCOA4	0.30474	4289.42	5298.27	0.00115727	NCOA4	10	8031		RFG	ARA70	DKFZp762E1112	PTC3	ELE1
GORASP2	0.304928	1337.54	1652.34	0.0217366	GORASP2	2	26003		GOLPH6	p59	FLJ13139	DKFZP434D156	GRS2	GRASP55
KIAA0182	0.305342	393.491	486.241	0.00130891	KIAA0182	16	23199		GSE1
NAV3	0.305719	343.181	424.184	0.0278185	NAV3	12	89795		unc53H3	STEERIN3	POMFIL1	KIAA0938
HYAL3	0.306185	199.772	247.005	0.0210959	HYAL3	3	8372		LUCA14	Minna14	LUCA-3	LUCA3
C17orf90	0.306256	398.837	493.16	0.00693816	C17ORF90	17	339229		MGC104712
DHX32	0.306429	570.649	705.69	0.00204084	DHX32	10	55760		FLJ10694	DDX32	FLJ10889	DHLP1
SLC25A22	0.307138	338.355	418.63	0.0125123	SLC25A22	11	79751		FLJ13044	GC1
FIS1	0.307309	1060.56	1312.34	0.0229386	FIS1	7	51024		TTC11	CGI-135
ARHGAP10	0.307378	413.301	511.442	0.00206726	ARHGAP10	4	79658		FLJ20896	PS-GAP	GRAF2	FLJ41791
TRIM8	0.307379	2361.09	2921.75	0.00244794	TRIM8	10	81603		RNF27	GERP
LEPREL2	0.307518	811.838	1004.71	0.00801654	LEPREL2	12	10536		P3H3	GRCB	HSU47926
CAMLG	0.307919	3146.93	3895.66	0.000222476	CAMLG	5	819		CAML	MGC163197
ATP6V1D	0.307978	3329.63	4121.99	0.000220824	ATP6V1D	14	51382		ATP6M	VATD	VMA8
GDE1	0.307994	383.106	474.279	0.00124027	GDE1	16	51573		GDE1	363E6.2
CYB561D1	0.308203	314.555	389.47	0.0144346	CYB561D1	1	284613
TMEM136	0.308252	497.322	615.787	0.00624864	TMEM136	11	219902		MGC17839
FIBCD1	0.308593	253.008	313.35	0.0160252	FIBCD1	9	84929		FLJ14810
ANXA1	0.308775	8924.46	11054.3	0.00487143	ANXA1	9	301		LPC1	ANX1
PAWR	0.308816	370.999	459.553	0.0021448	PAWR	12	5074		PAR4	Par-4
BAT5	0.309057	348.549	431.816	0.0136265	BAT5	6	7920		D6S82E	NG26
ACTG2	0.30945	14945.6	18521.1	0.0116158	ACTG2	2	72		ACTA3	ACTSG	ACTL3	ACTE	ACT
RCOR3	0.309882	398.755	494.299	0.00689787	RCOR3	1	55758		FLJ10876	RP11-318L16.1	FLJ16298
NDUFS8	0.310641	4790.61	5941.59	0.00265554	NDUFS8	11	4728		TYKY
SNX6	0.310772	412.629	511.813	0.000537523	SNX6	14	58533		MSTP010	MGC3157	TFAF2
SPATA20	0.311425	531.225	659.215	0.000496615	SPATA20	17	64847		MGC111032	FLJ21347	Tisp78	DKFZp686H1839	SSP411	FLJ21969
CPEB4	0.311587	193.301	239.9	0.0147658	CPEB4	5	80315		KIAA1673
FAM188A	0.311886	785.798	975.433	0.000285326	FAM188A	10	80013		DERP5	MST126	my042	FLJ13397	MSTP126	CARP	RP11-394I23.1
TRPC4AP	0.312202	1118.27	1388.45	0.00166846	TRPC4AP	20	26133		TRUSS	C20orf188	TRRP4AP
SAMD4A	0.313218	342.235	425.219	0.0134677	SAMD4A	14	23034		SMGA	SMG	SAMD4	Smaug	KIAA1053	DKFZp434H0350	Smaug1
AXUD1	0.313507	432.736	537.773	0.000685814	AXUD1	3	64651		FAM130B	TAIP-3	DKFZp566F164	URAX1
VPS72	0.313587	560.825	696.989	0.00040407	VPS72	1	6944		TCFL1	Swc2	YL1	CFL1	YL-1
CD81	0.313986	17311	21520	0.00015085	CD81	11	975		S5.7	TAPA1	TSPAN28
MFSD10	0.31411	3139.72	3903.44	0.00266605	MFSD10	4	10227		TETTRAN	TPO1
LRRC8A	0.314341	579.45	720.513	0.000708633	LRRC8A	9	56262		FLJ10337	KIAA1437	LRRC8
BECN1	0.314567	999.66	1243.22	0.012916	BECN1	17	8678		ATG6	VPS30	beclin1
C9orf127	0.314876	316.457	393.643	0.00197708	C9ORF127	9	51754		NGX6	RP11-112J3.10	NAG-5	MGC120460
CSDA	0.315505	7362.75	9162.56	0.000139296	CSDA	12	8531		CSDA1	DBPA	ZONAB
TSPO	0.315694	3614.05	4498.08	0.000288699	TSPO	22	706		IBP	PKBS	PBR	MBR	PTBR	DBI	pk18	mDRC	BZRP
MARCH2	0.31654	202.903	252.684	0.00893433	2002-03-01	19	51257		HSPC240	RNF172	MARCH-II
POLD4	0.316596	236.823	294.937	0.00499883	POLD4	11	57804		p12	POLDS
ABHD7	0.316734	379.115	472.19	0.00486877	ABHD7	1	253152		FLJ90341	EPHXRP
MRPL54	0.316786	1361.83	1696.23	0.0231134	MRPL54	19	116541
FAM38A	0.318113	2897.24	3611.99	0.00263031	FAM38A	16	9780		Mib
C11orf1	0.318193	412.434	514.21	0.023585	C11ORF1	11	64776		FLJ23499
KIAA1370	0.318564	262.295	327.105	0.0464957	KIAA1370	15	56204		MGC126494	FLJ10980	MGC126495
GRINA	0.318941	1106.41	1380.16	0.00807717	GRINA	8	2907		HNRGW	NMDARA1	TMBIM3	MGC99687
ARHGAP1	0.319257	1869.53	2332.59	0.000140655	ARHGAP1	11	392		RHOGAP	p50rhoGAP	RHOGAP1	CDC42GAP
SEC11C	0.319326	1541.44	1923.32	0.03329	SEC11C	18	90701		SPC21	SPCS4C	SEC11L3
LOC644936	0.31948	8496.23	10602.3	0.00273045	LOC644936	5	644936		MGC102982
RANGAP1	0.319534	3154.36	3936.41	0.0193251	RANGAP1	22	5905		SD	MGC20266	KIAA1835	Fug1
SLC22A4	0.319549	237.082	295.864	0.037769	SLC22A4	5	6583		OCTN1	MGC40524	MGC34546
ZNF226	0.319681	227.925	284.463	0.0128135	ZNF226	19	7769
BOLA2	0.31976	1371.77	1712.14	0.0265258	BOLA2	16	552900		BOLA2A	My016
CRTAP	0.31981	579.808	723.697	0.02602	CRTAP	3	10491		CASP	OI7
KIAA1600	0.319842	942.337	1176.22	0.0285169	KIAA1600	10	57700		RP11-106M7.3	bA106M7.3	DKFZp686D10123
PSTPIP2	0.3201	343.606	428.963	0.00178343	PSTPIP2	18	9050		MGC34175	MAYP
STOM	0.320235	1864.02	2327.29	0.0302412	STOM	9	2040		EPB7	EPB72	BND7
ZZEF1	0.32038	422.043	526.988	0.000522123	ZZEF1	17	23140		FLJ10821	ZZZ4	FLJ45574	KIAA0399
NACC2	0.320568	239.181	298.695	0.015751	NACC2	9	138151		BTBD14	MGC23427
ABLIM1	0.320588	204.719	255.661	0.0111029	ABLIM1	10	3983		KIAA0059	FLJ14564	MGC1224	LIMATIN	LIMAB1	DKFZp781D0148	ABLIM
CSNK1D	0.320724	1290.81	1612.17	0.000131668	CSNK1D	17	1453		HCKID
TUFM	0.321027	1484.86	1854.91	0.00172473	TUFM	16	7284		COXPD4	EF-TuMT	EFTU
IDI1	0.321694	466.608	583.166	0.0402095	IDI1	10	3422		IPP1	IPPI1
MMP10	0.321916	151.7	189.623	0.0476771	MMP10	11	4319		SL-2	STMY2
C17orf95	0.322673	362.815	453.753	0.0019474	C17ORF95	17	124512
ZFP36	0.322906	644.827	806.58	0.0249222	ZFP36	19	7538		NUP475	GOS24	TIS11	TTP	G0S24	RNF162A
CBARA1	0.323422	444.908	556.711	0.0189277	CBARA1	10	10367		CALC	EFHA3	DKFZp564C246	FLJ12684
NUDT14	0.324988	357.334	447.616	0.00189902	NUDT14	14	256281		UGPP
LEPROT	0.325047	2281.12	2857.57	8.39438e-05	LEPROT	1	54741		OB-RGRP	OBRGRP	FLJ90360	LEPR	VPS55
VASN	0.325118	3885.71	4867.89	0.0183624	VASN	16	114990		SLITL2
OCIAD2	0.325222	494.773	619.88	0.00165231	OCIAD2	4	132299		DKFZp686C03164	MGC45416
MCCC1	0.325245	439.16	550.213	0.0173755	MCCC1	3	56922		DKFZp686B20267	FLJ25545	MCCA	MCC-B
TSSC4	0.325768	678.249	850.071	0.00353088	TSSC4	11	10078
SNX17	0.326566	1828.62	2293.13	8.03454e-05	SNX17	2	9784		KIAA0064
PFDN6	0.326592	524.997	658.371	0.00120205	PFDN6	6	10471		HKE2	PFD6	H2-KE2	KE-2	MGC70744
FAM89B	0.326676	676.374	848.254	0.0124528	FAM89B	11	23625		MTVR1
LYSMD2	0.327639	780.884	979.977	0.0347907	LYSMD2	15	256586		MGC35274	DKFZp686I2243
PHACTR2	0.32788	906.552	1137.88	0.00563499	PHACTR2	6	9749		DKFZp686F18175	KIAA0680	C6orf56	MGC176642
BSDC1	0.328051	898.704	1128.16	0.00183764	BSDC1	1	55108		RP4-811H24.7	FLJ10276	DKFZp686B09139
CD151	0.328188	4733.09	5942.09	9.07521e-07	CD151	11	977		TSPAN24	MER2	GP27	SFA1	PETA-3	RAPH
PMM1	0.328371	1937.81	2433.1	0.00184875	PMM1	22	5372		Sec53
TST	0.328932	1189.36	1493.94	0.0259248	TST	22	7263		MGC19578	RDS
SLC4A2	0.329218	461.397	579.667	0.0406046	SLC4A2	7	6522		HKB3	NBND3	EPB3L1	AE2	BND3L
ITPA	0.329305	902.322	1133.68	0.0086999	ITPA	20	3704		dJ794I6.3	ITPase	HLC14-06-P	C20orf37
C12orf44	0.329559	863.894	1085.6	0.00312582	C12ORF44	12	60673		FLJ11773
IDS	0.329874	310.622	390.422	0.00364142	IDS	X	3423		MPS2	SIDS
LMOD1	0.330014	183.936	231.213	0.021554	LMOD1	1	25802		1D	D1	SM-LMOD	64kD
SNHG9	0.330335	1021.59	1284.45	0.00987538	SNHG9	16	735301		DKFZp686N06141
COMMD5	0.330591	464.256	583.815	0.0260196	COMMD5	8	28991		FLJ13008	HT002	HCARG	MGC72046
TMEM173	0.331198	1501.57	1889.06	0.000140094	TMEM173	5	340061		FLJ38577
PPP1R2	0.331219	609.02	766.194	0.00938646	PPP1R2	3	5504		MGC87148	IPP2
CRYBB2	0.331229	320.321	402.991	0.000744213	CRYBB2	22	1415		CCA2	D22S665	CRYB2	CRYB2A
CCND1	0.331319	16306.8	20516.6	5.30998e-05	CCND1	11	595		PRAD1	D11S287E	BCL1	U21B31
PHPT1	0.331688	2533.88	3188.85	0.000430453	PHPT1	9	29085		bA216L13.10	CGI-202	PHP14	HSPC141	RP11-216L13.10	DKFZp564M173
CHP	0.331818	1708.85	2150.76	0.0012892	CHP	15	11261		SLC9A1BP
PVRL2	0.331831	481.422	605.922	0.00222138	PVRL2	19	5819		PVRR2	HVEB	PRR2	CD112
C16orf56	0.332736	822.794	1036.23	8.3615e-05	C16ORF56	16	80152		FLJ13111
SLC2A6	0.332825	296.04	372.856	0.0117826	SLC2A6	9	11182		GLUT6	HSA011372	GLUT9
ZMAT3	0.332968	7494.85	9440.53	7.74726e-05	ZMAT3	3	64393		PAG608	WIG1	FLJ12296	WIG-1	MGC10613
PCSK7	0.333339	586.43	738.859	0.00170199	PCSK7	11	9159		SPC7	PC8	LPC	PC7
C9orf89	0.333419	473.889	597.098	0.0370417	C9ORF89	9	84270		MGC11115	BinCARD	MGC110898	bA370F5.1
WDR1	0.334837	5527.68	6971.7	0.00122681	WDR1	4	9948		NORI-1	AIP1
MGC10997	0.334891	1453.99	1833.89	0.00510707	MGC10997	15	84741
COX7A1	0.335277	397.985	502.105	0.000289226	COX7A1	19	1346		COX7AH	COX7A	COX7AM
TOB1	0.33629	680.043	858.558	0.0142031	TOB1	17	10140		MGC104792	TROB	APRO6	TROB1	PIG49	TOB	MGC34446
CENPT	0.336831	684.823	864.918	0.00107313	CENPT	16	80152		FLJ13111	CENP-T	FLJ43376	C16orf56
TMEM208	0.337504	475.598	600.951	0.000162376	TMEM208	16	29100		HSPC171
ATP2C1	0.337646	412.427	521.181	0.0119379	ATP2C1	3	27032		SPCA1	PMR1	HHD	hSPCA1	ATP2C1A	KIAA1347	BCPM
ANXA11	0.337749	466.205	589.183	0.00692452	ANXA11	10	311		ANX11	CAP50
SDF2	0.337958	1400.14	1769.73	4.33915e-05	SDF2	17	6388
FAM3C	0.338226	441.565	558.227	0.00258127	FAM3C	7	10447		GS3786	ILEI
GABARAPL2	0.338626	2346.96	2967.86	4.55242e-05	GABARAPL2	16	11345		GEF2	GATE16	GATE-16	GEF-2	ATG8
ATP6V1A	0.339218	2591.63	3278.59	0.0163441	ATP6V1A	3	523		VA68	Vma1	HO68	ATP6V1A1	VPP2	ATP6A1
MT1A	0.339546	11594.3	14670.9	0.002633	MT1A	16	4489		MTC	MT1	MGC32848	MT1S
PIN1	0.340196	3231.38	4090.69	3.21277e-05	PIN1	19	5300		UBL5	DOD
LOC730744	0.340408	2275.62	2881.19	3.29962e-05	LOC730744		730744
TCEAL4	0.340871	1304.34	1651.97	0.0454128	TCEAL4	X	79921		FLJ21174	NPD017	DKFZp686M0279
KIAA1191	0.340973	1406.36	1781.31	0.00302895	KIAA1191	5	57179		FLJ21022
IDH3G	0.341242	371.213	470.269	0.0144929	IDH3G	X	3421		H-IDHG
PLA2G15	0.341443	415.727	526.736	0.000185421	PLA2G15	16	23659		DKFZp564A0122	ACS	LPLA2	LLPL
LRRN3	0.341757	1673.76	2121.15	0.0167058	LRRN3	7	54674		NLRR-3	NLRR3	FLJ11129	FIGLER5
EDEM2	0.341785	396.4	502.367	0.0352106	EDEM2	20	55741		FLJ10783	bA4204.1	C20orf49	C20orf31
FLNC	0.342542	8812.79	11174.5	0.000344603	FLNC	7	2318		FLN2	ABPL	ABPA	FLJ10186	ABP-280	ABP280A
SRPX2	0.342727	355.065	450.276	0.000290458	SRPX2	X	27286		SRPUL	RESDX
C15orf24	0.342902	3962.51	5025.68	0.000450326	C15ORF24	15	56851		C11orf3	HT022	ORF1-FL1
RILPL1	0.343775	1228.53	1559.09	3.21447e-05	RILPL1	12	353116		MGC105128	FLJ39378	MGC99793
SEPW1	0.343961	1388.76	1762.67	3.02119e-05	SEPW1	19	6415		selW
NDUFV2	0.344162	3972.01	5042.12	2.48425e-05	NDUFV2	18	4729
CCPG1	0.344919	210.311	267.112	0.00155798	CCPG1	15	9236		KIAA1254	CPR8
KLHDC8B	0.344949	500.372	635.525	0.0253628	KLHDC8B	3	200942		FLJ11302	MGC35097
SNRK	0.345009	492.776	625.904	0.00764909	SNRK	3	54861		HSNFRK	DKFZp779A1866	FLJ20224	KIAA0096
SUMF2	0.345293	1215.42	1544.08	0.00513035	SUMF2	7	25870		pFGE	DKFZp566I1024	MGC99485	DKFZp781L1035	DKFZp66I1024	DKFZp686L17160
SORT1	0.34534	600.585	763.013	0.0252169	SORT1	1	6272		NT3	Gp95
IKBKG	0.345502	1115.28	1417.07	3.06499e-05	IKBKG	X	8517		IPD2	FIP3	NEMO	IP2	Fip3p	IP1	IKK-gamma	AMCBX1	FIP-3	IP
SYNGR1	0.345652	194.438	247.078	0.00115511	SYNGR1	22	9145		MGC:1939
TSPYL1	0.346023	962.489	1223.37	0.0305581	TSPYL1	6	7259		TSPYL
TP53INP1	0.346321	259.745	330.218	0.0100825	TP53INP1	8	94241		TP53INP1A	Teap	p53DINP1	TP53DINP1	SIP	FLJ22139	DKFZp434M1317	TP53INP1B
DPM2	0.346569	425.045	540.459	0.0405594	DPM2	9	8818		MGC111193	MGC21559
SSU72	0.346638	3051.87	3880.74	2.16374e-05	SSU72	1	29101		PNAS-120	HSPC182	FLJ13048
GDI1	0.346989	985.638	1253.64	0.0142762	GDI1	X	2664		OPHN2	MRX48	RABGD1A	GDIL	XAP-4	RABGDIA	MRX41	FLJ41411
MET	0.347013	531.784	676.389	0.00106735	MET	7	4233		RCCP2	HGFR	AUTS9
SRP14	0.347169	4409.27	5608.86	0.0260434	SRP14	15	6727		ALURBP	MGC14326
C19orf10	0.347256	1396.94	1777.1	0.00105188	C19ORF10	19	56005		EUROIMAGE1875335	R33729_1	SF20	IL27	IL27w	IL25
ELAC2	0.347447	378.439	481.49	0.000321481	ELAC2	17	60528		ELC2	FLJ10530	FLJ36693	HPC2	FLJ42848
CDC37	0.347523	7842.62	9978.75	1.96231e-05	CDC37	19	11140		P50CDC37
LOC440957	0.348123	708.232	901.511	3.99782e-05	LOC440957	3	440957
TSPAN13	0.349312	211.284	269.165	0.000833824	TSPAN13	7	27075		FLJ22934	NET-6	TM4SF13
PKIA	0.349322	357.634	455.612	0.0494258	PKIA	8	5569		PRKACN1
TACC1	0.349453	4540.61	5785.09	1.76654e-05	TACC1	8	6867		DKFZp686K18126	Ga55	KIAA1103
SLC12A9	0.350194	581.031	740.659	5.23784e-05	SLC12A9	7	56996		FLJ46905	CIP1
PLOD1	0.350256	5101.07	6502.78	0.0100731	PLOD1	1	5351		LLH	PLOD	LH
C10orf26	0.35033	281.222	358.517	0.000539069	C10ORF26	10	54838		MGC125648	FLJ20367	FLJ20154	OPAL1
C20orf30	0.351643	3162.57	4035.48	0.0145037	C20ORF30	20	29058		HSPC274	dJ1116H23.2.1
YIF1A	0.351735	1458.47	1861.14	1.82482e-05	YIF1A	11	10897		FinGER7	54TM	YIF1P	YIF1
MARCH4	0.351756	1448.62	1848.6	0.0022334	2004-03-01	2	57574		MARCH-IV	RNF174	MGC104908
HIST2H2BE	0.35186	400.367	510.95	0.0252603	HIST2H2BE	1	8349		H2BFQ	MGC119804	MGC129733	H2B/q	GL105	MGC129734	H2B	MGC119802	H2B.1
PXN	0.352747	374.118	477.744	0.000417509	PXN	12	5829		FLJ16691
UBQLN3	0.353441	222.861	284.728	0.00159387	UBQLN3	11	50613		TUP-1
PNPO	0.353691	841.365	1075.12	0.0330688	PNPO	17	55163		PDXPO	FLJ10535
TWSG1	0.353821	2549.53	3258.15	0.000206964	TWSG1	18	57045		TSG
FAM195A	0.353859	407.601	520.904	0.0204113	FAM195A	16	84331		c349E10.1	MGC104301	MGC15416
C14orf149	0.354957	517.462	661.807	7.44103e-05	C14ORF149	14	112849		FLJ25436
LASS2	0.355291	893.832	1143.43	0.0303122	LASS2	1	29956		SP260	CerS2	MGC987	TMSG1	L3	FLJ10243
MRPL34	0.355759	870.331	1113.73	0.00684942	MRPL34	19	64981		L34mt	MGC2633	MGC24974
RP2	0.355943	244.7	313.173	0.015954	RP2	X	6102		KIAA0215	TBCCD2
TM2D1	0.355949	1094.94	1401.34	0.000751163	TM2D1	1	83941		BBP
ADD1	0.356213	3766.34	4821.15	0.0010163	ADD1	4	118		ADDA	MGC44427	MGC3339
RELA	0.356615	320.993	411.005	0.033419	RELA	11	5970		NFKB3	MGC131774
GNAI2	0.357111	4704.69	6026.04	0.00386164	GNAI2	3	2771		H_LUCA16.1	GIP	GNAI2B	H_LUCA15.1
TNFAIP1	0.359037	1221.96	1567.25	0.00136413	TNFAIP1	17	7126		EDP1	B61	B12	MGC2317
DNASE1L1	0.359151	263.046	337.402	1.43351e-06	DNASE1L1	X	1774		DNL1L	XIB	DNAS1L1	DNASEX
PACS1	0.359945	369.679	474.438	0.00569405	PACS1	11	55690		FLJ10209	KIAA1175
WIPI1	0.360286	620.236	796.185	0.0299956	WIPI1		55062		WIPI49	FLJ10055	Atg18
KIAA2013	0.361239	900.043	1156.13	0.020461	KIAA2013	1	90231		MGC33867	RP5-1077B9.1
FCHSD2	0.361323	331.195	425.455	0.00338642	FCHSD2	11	9873		NWK	KIAA0769	SH3MD3
PEX11B	0.361448	1038.1	1333.67	0.00723474	PEX11B	1	8799		PEX11-BETA
OKL38	0.362123	604.288	776.701	2.22938e-05	OKL38	16	29948		BDGI
WBSCR22	0.362272	876.854	1127.15	0.0006188	WBSCR22	7	114049		MGC2022	MGC5140	HUSSY-3	MGC19709	WBMT	PP3381	HASJ4442
CLEC11A	0.362448	1662.8	2137.71	0.00850579	CLEC11A	19	6320		LSLCL	P47	SCGF	CLECSF3
ZNF650	0.362771	303.063	389.706	0.0033985	ZNF650	2	130507		MGC126489	FLJ37422	DKFZp434P117	DKFZp686N10185	KIAA2024
CD59	0.363014	679.516	873.932	0.000412895	CD59	11	966		MIN2	PROTECTIN	MIN3	16.3A5	MSK21	EJ16	EL32	G344	MIC11	MIN1	MGC2354	EJ30
RNF103	0.363042	523.948	673.868	0.000763769	RNF103	2	7844		MGC41857	hkf-1	ZFP103	KF1	MGC102815
NOMO1	0.36309	574.019	738.29	0.00057632	NOMO1	16	23420		Nomo	PM5
UCHL1	0.363165	7204.08	9266.21	0.0211166	UCHL1	4	7345		PARK5	Uch-L1	PGP9.5
PARL	0.363259	1086.7	1397.86	0.000160727	PARL	3	55486		PSARL	PSENIP2	PSARL1	RHBDS1	PRO2207
BDNF	0.364399	497.856	640.912	3.49973e-06	BDNF	11	627		MGC34632
HBEGF	0.364475	920.35	1184.87	0.017254	HBEGF	5	1839		DTS	DTSF	HEGFL	DTR
SNTA1	0.364481	349.913	450.484	0.0049671	SNTA1	20	6640		SNT1	dJ1187J4.5	TACIP1
ESRRA	0.365042	244.097	314.377	0.000577862	ESRRA	11	2101		NR3B1	ERRalpha	ERRa	ERR1	ESRL1
HIST2H2AC	0.365504	419.731	540.752	0.000128443	HIST2H2AC	1	8338		H2AFQ	MGC74460	H2A	H2A/q	H2A-GL101
C1orf133	0.366134	376.82	485.681	0.00152518	C1ORF133	1	574036
TMED10P	0.366306	3973.35	5121.84	0.00153817	TMED10P	8	286102		Tmp21-II
NT5C2	0.366381	1745.38	2250	4.31459e-05	NT5C2	10	22978		cN-II	NT5B	PNT5	GMP
TNPO2	0.366487	1773.74	2286.73	1.03524e-05	TNPO2	19	30000		KPNB2B	FLJ12155	TRN2	IPO3
FLII	0.366522	793.326	1022.79	0.000309709	FLII	17	2314		Fli1	FLIL	MGC39265	FLI
PNMA1	0.367539	388.187	500.819	5.47036e-05	PNMA1	14	9240		MA1
NGRN	0.367564	2249.94	2902.82	0.0199157	NGRN	15	51335		NEUGRIN	DSC92
KRTAP4-12	0.367589	183.038	236.155	0.00787681	KRTAP4-12	17	83755		KAP4.12	KRTAP4.12
ZFPM1	0.36771	351.228	453.19	0.000192213	ZFPM1	16	161882		FOG1	ZNF408	FOG	ZNF89A
NOG	0.368057	154.437	199.319	0.0136821	NOG	17	9241		SYNS1	SYM1
TGFBI	0.368086	13244.7	17094.1	0.000627742	TGFBI	5	7045		CSD1	CSD2	CDB1	CDGG1	EBMD	CSD3	BIGH3	LCD1	CDG2	CSD
RFTN1	0.368273	2704.3	3490.74	0.00300621	RFTN1	3	23180		PIG9	RAFTLIN	KIAA0084	MGC141678	PIB10	MGC44480	MIG2	FLJ23866
PEX16	0.368399	325.219	419.832	0.00234345	PEX16	11	9409
RTCD1	0.368448	1095.84	1414.69	0.00022171	RTCD1	1	8634		RPC
PRDX5	0.368667	2778.43	3587.39	0.000651903	PRDX5	11	25824		PRDX6	AOEB166	MGC142285	SBBI10	ACR1	MGC142283	B166	PRXV	PLP	MGC117264	PMP20
PLCD3	0.369038	230.121	297.199	0.020453	PLCD3	17	113026		MGC71172
GBF1	0.369204	363.876	469.997	0.000285237	GBF1	10	8729		KIAA0248	MGC134878	FLJ21500	MGC134877	FLJ21263
ANTXR1	0.369725	792.881	1024.49	0.000821794	ANTXR1	2	84168		ATR	FLJ21776	FLJ11298	TEM8	FLJ10601
MCAM	0.369732	204.625	264.398	0.0183624	MCAM	11	4162		MUC18	CD146
PRPSAP2	0.370047	646.675	835.759	0.000173793	PRPSAP2	17	5636		MGC126719	MGC117304	MGC126721	PAP41
ATP6V1E1	0.370634	2968.78	3838.4	0.030809	ATP6V1E1	22	529		ATP6E2	ATP6E	P31	ATP6V1E	Vma4
AP2M1	0.370642	2394.19	3095.52	0.00160551	AP2M1	3	1173		AP50	mu2	CLAPM1
CAPZB	0.3707	1760.33	2276.07	0.00261454	CAPZB	1	832		CAPB	MGC104401	MGC129749	MGC129750	CAPZ	CAPPB
FAS	0.371642	224.942	291.035	0.0423875	FAS	10	355		CD95	APT1	FASTM	FAS1	APO-1	ALPS1A	TNFRSF6
GTF3C1	0.371663	476.536	616.563	0.00892672	GTF3C1	16	2975		TFIIIC220	TFIIIC	DKFZp686A111	TFIIICalpha
GK	0.371806	379.711	491.335	0.00457167	GK	X	2710		GKD	GK1
TMEM205	0.372677	1035.8	1341.1	6.32174e-05	TMEM205	19	374882		UNQ501	MGC110858
PGLS	0.372756	1026.31	1328.89	5.64907e-06	PGLS	19	25796		6PGL
BSCL2	0.373814	727.671	942.898	7.82564e-06	BSCL2	11	26580		SPG17	MGC4694	HMN5	GNG3LG
CIB1	0.373827	2947.29	3819.06	0.000268559	CIB1	15	10519		SIP2-28	KIP	CALMYRIN	CIB
CLIC3	0.373851	167.229	216.696	0.00427008	CLIC3	9	9022
PTDSS2	0.375678	526.71	683.38	3.6707e-05	PTDSS2	11	81490		PSS2
NR1H2	0.375957	339.188	440.165	0.00756487	NR1H2	19	7376		NER	LXR-b	UNR	RIP15	NER-I	LXRB
PPP3CC	0.376241	557.419	723.505	0.000114011	PPP3CC	8	5533		CALNA3
POMGNT1	0.376329	1254.7	1628.65	4.94013e-06	POMGNT1	1	55624		MGAT1.2	FLJ20277	DKFZp761B182	GnTI.2	MEB
CCDC90B	0.376363	2894.52	3757.27	2.25476e-05	CCDC90B	11	60492		MDS011	MGC104239	MDS025
AK1	0.376407	546.207	709.035	0.0006654	AK1	9	203
RDH5	0.376736	182.131	236.479	0.0127876	RDH5	12	5959		RDH1	HSD17B9
IGFBP6	0.378015	1670.02	2170.28	0.000461235	IGFBP6	12	3489		IBP6
TM9SF2	0.378651	1549.83	2014.97	3.07336e-06	TM9SF2	13	9375		P76	MGC117391	FLJ26287
C5orf5	0.380564	466.277	607.023	1.36131e-05	C5ORF5	5	51306		KHCHP	MGC57159	DKFZp667F249	N61
ZBTB4	0.380743	1051.97	1369.68	0.000104343	ZBTB4	17	57659		KAISO-L1	KIAA1538
TMEM50B	0.381859	690.594	899.858	0.000764529	TMEM50B	21	757		C21orf4	HCVP7TP3	DKFZp686C2482
ZFAND5	0.382013	4419.71	5759.58	1.02019e-05	ZFAND5	9	7763		ZFAND5A	ZA20D2	ZNF216
PIGT	0.382254	717.024	934.552	0.0103222	PIGT	20	51604		MGC8909	NDAP	FLJ41596	CGI-06
STXBP3	0.382262	388.311	506.118	0.000885598	STXBP3	1	6814		UNC-18C	MUNC18C	MUNC18-3	PSP
FAM13B	0.382911	691.604	901.832	7.90347e-06	FAM13B	5	51306		KHCHP	MGC57159	FLJ26735	DKFZp667F249	N61
OPTN	0.383112	1243.39	1621.57	0.0020427	OPTN	10	10133		FIP2	HYPL	NRP	TFIIIA-INTP	HIP7	GLC1E
TALDO1	0.383249	7385.83	9633.16	0.0121571	TALDO1	11	6888		TALDOR	TAL	TAL-H	TALH
EML3	0.383369	590.048	769.649	0.00153589	EML3	11	256364		MGC111422	ELP95	FLJ35827
TMED4	0.383573	678.186	884.74	8.88404e-05	TMED4	7	222068		HNLF
HINT2	0.383709	684.174	892.636	4.46083e-06	HINT2	9	84681		HIT-17
S100A16	0.383947	2265.4	2956.13	3.78163e-05	S100A16	1	140576		DT1P1A7	MGC17528	S100F	AAG13
CDC42BPB	0.38442	506.113	660.647	0.0142288	CDC42BPB	14	9578		KIAA1124	MRCKB
GPR172A	0.384967	1141.59	1490.72	7.5813e-06	GPR172A	8	79581		GPCR41	PAR1	D15Ertd747e	GPCR
ACADVL	0.384968	1303.17	1701.72	0.00624679	ACADVL	17	37		ACAD6	VLCAD	LCACD
GSS	0.385052	525.345	686.052	0.00159387	GSS	20	2937		MGC14098	GSHS
SMAD6	0.385387	322.695	421.507	0.0238174	SMAD6	15	4091		MADH6	HsT17432	MADH7
ACYP2	0.385623	260.846	340.776	0.00255593	ACYP2	2	98		ACYP	ACYM
TNFRSF10B	0.386019	648.787	847.823	0.0375256	TNFRSF10B	8	8795		KILLER/DR5	TRICK2	TRAILR2	TRICK2A	KILLER	TRICKB	ZTNFR9	TRAIL-R2	DR5	TRICK2B	CD262
GNPTG	0.386152	439.719	574.67	1.17494e-05	GNPTG	16	84572		GNPTAG	LP2537	RJD9
TMEM167B	0.386742	632.327	826.728	0.000171332	TMEM167B	1	56900		AD-020	FLJ90710
RECK	0.386951	622.83	814.429	0.0404507	RECK	9	8434		ST15	hRECK
MRPL43	0.387501	989.955	1294.98	0.0423846	MRPL43	10	84545		MGC48892	MGC17989	bMRP36a
PDLIM1	0.387515	3038.94	3975.36	0.000477625	PDLIM1	10	9124		CLP36	CLP-36	hCLIM1	CLIM1	ELFIN
ZNFX1	0.38796	532.734	697.105	0.000211173	ZNFX1	20	57169		MGC131926	FLJ39275
TAF7	0.388117	701.066	917.474	3.27186e-06	TAF7	5	6879		TAFII55	TAF2F
RER1	0.388245	456.248	597.138	0.0177546	RER1	1	11079		RP4-740C4.2
ATP6V0E1	0.388271	5870.89	7683.95	3.07749e-06	ATP6V0E1	5	8992		Vma21p	ATP6V0E	Vma21	ATP6H	M9.2
SIL1	0.389121	398.086	521.332	0.00510791	SIL1	5	64374		MSS	BAP	ULG5
PLEKHA1	0.389211	404.415	529.653	0.00107515	PLEKHA1	10	59338		TAPP1
IL17D	0.389658	205.385	269.072	0.000584165	IL17D	13	53342		IL-22	IL-17D	IL-27	IL27	FLJ30846
SPOCD1	0.390038	1556.89	2040.19	1.39348e-06	SPOCD1	1	90853		FLJ39908	FLJ25348	RP11-84A19.1
CTBS	0.39006	365.979	479.596	0.021285	CTBS	1	1486		CTB
CISD1	0.390799	3137.23	4113.28	0.00114718	CISD1	10	55847		C10orf70	MDS029	mitoNEET	ZCD1	MGC14684
LOC728946	0.391129	308.642	404.76	0.0329117	LOC728946	17	728946
NAT14	0.391444	672.735	882.43	0.00158157	NAT14	19	57106		KLP1
TAX1BP3	0.391937	3347.4	4392.3	0.000163462	TAX1BP3	17	30851		TIP-1
C14orf4	0.392086	1331.77	1747.67	2.5303e-06	C14ORF4	14	64207		IRF2BPL	KIAA1865	EAP1
C19orf22	0.392197	1321	1733.66	0.000503952	C19ORF22	19	91300		MGC16353
GFPT1	0.39244	712.978	935.863	4.54124e-05	GFPT1	2	2673		GFA	GFPT	GFAT	GFAT1	GFAT1m
NAGK	0.392465	1510.95	1983.33	0.00605666	NAGK	2	55577		GNK	HSA242910
ECH1	0.392561	459.565	603.281	0.0138298	ECH1	19	1891		HPXEL
NT5E	0.392858	4107.87	5393.6	0.00547666	NT5E	6	4907		eN	eNT	NT5	NT	CD73	NTE	E5NT
FAM100A	0.393023	310.655	407.934	0.00211014	FAM100A	16	124402		FLJ32185	FLJ31223	PP11303
VAT1	0.393201	976.191	1282.04	1.506e-06	VAT1	17	10493		FLJ20230	VATI
TEX264	0.393481	302.13	396.866	0.000716628	TEX264	3	51368		FLJ13935	SIG11	ZSIG11	DKFZp451H0417
MT2A	0.393493	14046.9	18451.6	0.00233438	MT2A	16	4502		MT2
C14orf173	0.393679	1135.99	1492.39	0.000453594	C14ORF173	14	64423		DKFZp762A0214	FLJ22056	pp9484
LYRM5	0.394505	801.782	1053.94	1.73429e-06	LYRM5	12	144363
SHC1	0.395025	2634.46	3464.22	0.00370112	SHC1	1	6464		p66	SHC	p66SHC	SHCA	FLJ26504	p52SHC
CAPNS1	0.395621	2801.05	3684.81	6.07667e-06	CAPNS1	19	826		CANP	CALPAIN4	CDPS	30K	CANPS	CAPN4
ACOX3	0.395623	444.791	585.126	0.00500838	ACOX3	4	8310
DUSP23	0.395641	527.76	694.283	3.67209e-06	DUSP23	1	54935		MOSP	FLJ20442	RP11-190A12.1	DUSP25	VHZ	LDP-3
CSRP1	0.395788	5824.25	7662.74	0.0496178	CSRP1	1	1465		CRP	CRP1	DKFZp686M148	D1S181E	CSRP	CYRP
DSTN	0.395893	4172.22	5489.63	0.000110848	DSTN	20	11034		ACTDP	bA462D18.2	ADF
APH1B	0.396157	442.538	582.38	0.00172473	APH1B	15	83464		PRO1328	TAAV688	APH-1B	DKFZp564D0372	PSFL
PINK1	0.396449	739.994	974.028	1.70905e-06	PINK1	1	65018		FLJ27236	PARK6	BRPK
RAB11FIP5	0.396889	1022.28	1346	1.11931e-06	RAB11FIP5	2	26056		RIP11	pp75	KIAA0857	GAF1	DKFZP434H018
PPP1R7	0.399149	837.564	1104.52	2.07601e-06	PPP1R7	2	5510		SDS22
MPPE1	0.4001	464.671	613.179	4.02191e-06	MPPE1	18	65258
FBXO33	0.400223	854.189	1127.28	0.0101557	FBXO33	14	254170		c14_5247	Fbx33
CHPF	0.40177	575.298	760.043	1.96257e-06	CHPF	2	79586		FLJ22678	CSS2
CALM1	0.402138	3447.18	4555.33	0.0416658	CALM1	14	801		PHKD	CALML2	CAMI	DD132
MAEA	0.403897	387.679	512.929	0.0364537	MAEA	4	10296		EMLP	HLC-10	EMP	PIG5
FOXC1	0.403942	685.562	907.079	0.0345142	FOXC1	6	2296		FREAC3	FKHL7	IHG1	ARA	IRID1	IGDA
INF2	0.40422	498.919	660.256	0.0230891	INF2	14	64423		DKFZp762A0214	C14orf151	FLJ22056	INF2	MGC13251	C14orf173	pp9484
CSNK2B	0.404221	2718.86	3598.06	5.22682e-07	CSNK2B	6	1460		CK2B	CSK2B	MGC138224	CK2N	G5A	MGC138222
MYOF	0.405188	3654.5	4839.51	3.29962e-05	MYOF	10	26509
ATP6V0B	0.405531	1183.35	1567.44	0.0356567	ATP6V0B	1	533		HATPL	ATP6F	VMA16
C2orf7	0.405758	566.084	749.939	0.0302013	C2ORF7	2	84279		PAP21	MGC13004
C18orf32	0.406072	387.557	513.541	0.0190785	C18ORF32	18	497661		FLJ23458
NPY	0.407237	242.513	321.608	0.000789518	NPY	7	4852		PYY4
MGC72080	0.407627	298.476	395.929	0.0463553	MGC72080	7	389538
FLJ40504	0.407916	496.578	658.843	0.0124528	FLJ40504	17	284085		MGC138233	MGC138231
RPUSD1	0.408299	426.835	566.462	3.31168e-06	RPUSD1	16	113000		MGC19600	RLUCL	C16orf40
FAM108A3	0.408508	263.467	349.704	0.000468349	FAM108A3	1	653401		FAM108A2	C1orf47
YIPF3	0.408551	1634.03	2168.93	0.00164547	YIPF3	6	25844		FinGER3	dJ337H4.3	KLIP1	DKFZP566C243	RP3-337H4.3	C6orf109
ISCU	0.409324	1141.38	1515.82	3.45426e-05	ISCU	12	23479		hnifU	2310020H20Rik	MGC74517	NIFU	NIFUN	ISU2
GPR177	0.409359	1174.25	1559.51	8.3598e-06	GPR177	1	79971		FLJ23091	C1orf139	WLS	EVI	MGC131760	MRP	MGC14878
RASSF7	0.409854	399.356	530.565	4.55123e-06	RASSF7	11	8045		C11orf13	HRC1	MGC126070	MGC126069	HRAS1
PNPLA6	0.410054	944.65	1255.19	0.00911078	PNPLA6	19	10908		sws	NTE
ESRRAP2	0.410869	297.537	395.571	0.000276699	ESRRAP2	13	144832		ESTRRA
C5orf32	0.411072	389.805	518.313	0.00535038	C5ORF32	5	84418		ORF1-FL49
TP53INP2	0.411462	465.116	618.62	0.000356617	TP53INP2	20	58476		DKFZp434O0827	FLJ23500	dJ1181N3.1	DKFZp434B2411	PINH	FLJ21759	C20orf110
MGAT1	0.411953	2028.83	2699.33	0.0188826	MGAT1	5	4245		GLYT1	GLCT1	GNT-1	GLCNAC-TI	MGAT	GNT-I
PTGS1	0.412372	713.876	950.078	0.0159934	PTGS1	9	5742		PCOX1	PHS1	PGHS1	COX1	PGHS-1	PGG/HS	PTGHS	COX3
KIAA1128	0.412523	357.706	476.111	0.0071191	KIAA1128	10	54462		FLJ14262	bA486O22.1
CSTB	0.41308	6143.31	8179.98	0.000259597	CSTB	21	1476		PME	CST6	EPM1	STFB
MRAS	0.413735	212.825	283.51	0.00313201	MRAS	3	22808		RRAS3	M-RAs	FLJ42964	R-RAS3
IFI27L2	0.415448	1369.56	1826.6	0.000587755	IFI27L2	14	83982		TLH29	MGC44913
VPS37B	0.416125	756.18	1009	0.021868	VPS37B	12	79720		FLJ12750
MGRN1	0.416203	517.776	690.927	0.00617304	MGRN1	16	23295		CD41B	RNF156	KIAA0544	GP2B	ITGA2B
ATP6AP1	0.416427	3243.42	4328.73	0.025532	ATP6AP1	X	537		XAP-3	CF2	16A	ATP6IP1	ATP6S1	Ac45	MGC129781	XAP3	VATPS1
ACTR1A	0.416948	1655.91	2210.8	0.000622322	ACTR1A	10	10121		ARP1
TESK1	0.417097	363.297	485.088	3.88359e-06	TESK1	9	7016
TM4SF1	0.41731	13885.6	18543.4	9.78721e-05	TM4SF1	3	4071		M3S1	L6	H-L6	TAAL6
NUCB1	0.419139	5176.14	6921.16	3.27005e-07	NUCB1	19	4924		DKFZp686A15286	NUC	FLJ40471
TRAK1	0.419437	382.143	511.08	2.52611e-08	TRAK1	3	22906		OIP106
LARP4B	0.419752	950.902	1272.02	0.0258101	LARP4B	10	23185		RP11-164C1.3	KIAA0217	DKFZp686M23113
C20orf100	0.419853	5107.53	6832.82	3.80175e-06	C20ORF100	20	84969		dJ1108D11.2	MGC15880	GCX-1	dJ495O3.1
FLJ20489	0.42095	211.752	283.495	0.00011444	FLJ20489	12	55652
DLG4	0.421227	237.7	318.296	4.57113e-05	DLG4	17	1742		SAP90	PSD95
CIRBP	0.421234	3735.49	5002.09	0.00231107	CIRBP	19	1153		CIRP
WRB	0.421937	771.704	1033.87	0.00192355	WRB	21	7485		CHD5
SIGMAR1	0.422213	673.335	902.257	1.6561e-10	SIGMAR1	9	10280		SIGMAR1	MGC3851	FLJ25585	SR-BP1
TOR1B	0.422474	434.785	582.709	2.82814e-05	TOR1B	9	27348		DQ1	MGC4386
SLC16A3	0.422506	5814.68	7793.15	1.06087e-07	SLC16A3	17	9123		MCT3	MGC138472	MGC138474	MCT4
NAGLU	0.422693	423.378	567.508	0.0380709	NAGLU	17	4669		MPS IIIB	NAG	MPS3B	UFHSD
POLR3GL	0.42276	1198.89	1607.1	3.83051e-06	POLR3GL	1	84265		MGC3200	FLJ34890	flj32422
SCYL1	0.423398	1563.94	2097.38	0.000452546	SCYL1	11	57410		TRAP	P105	NTKL	TEIF	GKLP	MGC78454	NKTL	TAPK	HT019
IL1RAPL1	0.425981	383.094	514.682	0.0393406	IL1RAPL1	X	11141		MRX34	IL1RAPL	OPHN4	MRX21	TIGIRR-2	IL1R8
TSC22D1	0.426838	477.627	642.066	0.0476747	TSC22D1	13	8848		TSC22	RP11-269C23.2	DKFZp686O19206	TGFB1I4	MGC17597
AIG1	0.428687	421.625	567.51	2.90396e-06	AIG1	6	51390		FLJ10485	dJ95L4.1	RP1-95L4.1	DKFZp686F03136	AIG-1
HOXB7	0.429561	812.756	1094.64	1.3977e-07	HOXB7	17	3217		HOX2C	HOX2	HHO.C1	Hox-2.3
SCAND1	0.430309	702.545	946.694	0.000169664	SCAND1	20	51282		RAZ1	SDP1
LASS5	0.430537	595.533	802.621	0.00909926	LASS5	12	91012		Trh4	MGC45411	FLJ25304
ARPC4	0.430557	1393.63	1878.27	0.00908799	ARPC4	3	10093		ARC20	p20-Arc	MGC13544
PPPDE2	0.430703	851.423	1147.62	6.26485e-05	PPPDE2	22	27351		DJ347H13.4	D15Wsu75e	MGC138384
FEZ2	0.430794	3050.28	4111.7	0.000731725	FEZ2	2	9637		MGC117372	HUM3CL
SCO1	0.431119	1246.19	1680.21	3.27186e-06	SCO1	17	6341		SCOD1
CYBASC3	0.43133	448.864	605.283	7.88552e-07	CYBASC3	11	220002		MGC20446
PYGB	0.433331	974.491	1315.9	9.25561e-07	PYGB	20	5834		MGC9213
MTCH1	0.433557	7983.94	10782.8	0.000992249	MTCH1	6	23787		PIG60	MGC131998	CGI-64	PSAP
C21orf7	0.435042	613.263	829.101	0.0124761	C21ORF7	21	56911		TAKL-2	TAK1L	TAKL-1	HC21ORF7	TAKL
ARL6IP5	0.435163	3078.56	4162.41	4.34325e-07	ARL6IP5	3	10550		JWA	DERP11	addicsin	jmx	PRAF3	HSPC127	GTRAP3-18	hp22
PCYOX1	0.435349	866.01	1171.05	0.00628991	PCYOX1	2	51449		KIAA0908	PCL1
TUBB6	0.435564	3486.49	4715.26	0.000456708	TUBB6		84617
CD44	0.435696	5860.75	7927.04	1.72122e-06	CD44	11	960		LHR	CDW44	ECMR-III	MGC10468	MDU2	CSPG8	Pgp1	IN	MUTCH-I	MIC4	MDU3	MC56
SSR4	0.436	3140.45	4248.55	2.59336e-06	SSR4	X	6748		TRAPD
MTE	0.436365	1375.72	1861.61	3.21277e-05	MTE		644314		MT1I
SC5DL	0.437524	405.394	549.017	2.12068e-05	SC5DL	11	6309		ERG3	SC5D	S5DES
APRT	0.438732	884.668	1199.09	1.45732e-05	APRT	16	353		MGC125857	AMP	MGC125856	DKFZp686D13177	MGC129961
C9orf16	0.43927	216.56	293.637	5.28161e-05	C9ORF16	9	79095		EST00098	FLJ12823	MGC4639
ECM1	0.439737	1548.79	2100.72	0.000362257	ECM1	1	1893
PHLDB1	0.441285	895.082	1215.36	0.0145399	PHLDB1	11	23187		FLJ90266	DKFZp686O24210	LL5A	DKFZp686H039	FLJ00141	KIAA0638	MGC111531
RRM2B	0.441476	286.644	389.261	2.95359e-05	RRM2B	8	50484		DKFZp686M05248	MGC102856	p53R2	MGC42116
FAM113B	0.441578	230.403	312.908	0.00670626	FAM113B	12	91523		MGC16044
CCDC107	0.44171	253.679	344.551	0.00158272	CCDC107	9	203260		MGC31967	RP11-331F9.6
TRIM22	0.441974	281.389	382.257	0.00690287	TRIM22	11	10346		STAF50	GPSTAF50	RNF94
MT1G	0.442114	521.382	708.347	2.22938e-05	MT1G	16	4495		MT1	MT1K	MGC12386
CAP2	0.44226	2339.89	3179.28	3.10386e-07	CAP2	6	10486
INPPL1	0.442386	951.708	1293.23	5.8906e-05	INPPL1	11	3636		SHIP2
COMT	0.442471	1415.89	1924.1	4.22687e-06	COMT	22	1312
DGKA	0.442592	241.58	328.318	0.000379835	DGKA	12	1606		MGC42356	DGK-alpha	DAGK1	MGC12821	DAGK
SLC4A4	0.442648	250.728	340.764	0.0085391	SLC4A4	4	8671		KNBC	pNBC	NBC2	NBC1	hhNMC	HNBC1	SLC4A5	DKFZp781H1314
RAGE	0.442923	1400.8	1904.19	8.6291e-05	RAGE	14	5891		MOK	RAGE1
PTGES2	0.443962	700.146	952.433	7.98557e-05	PTGES2	9	80142		mPGES-2	PGES2	GBF1	C9orf15	MGC11289	FLJ14038
STAMBPL1	0.44464	2314.75	3150.31	2.10833e-08	STAMBPL1	10	57559		bA399O19.2	AMSH-LP	ALMalpha	KIAA1373	FLJ31524	AMSH-FP
RIPK2	0.444782	1220.06	1660.63	0.0148643	RIPK2	8	8767		RIP2	GIG30	RICK	CARDIAK	CARD3	CCK
AK3	0.447726	1041.72	1420.79	0.000712112	AK3	9	50808		AKL3L1	AK6	AKL3L	AK3L1	FIX
GPX3	0.447913	166.528	227.155	0.000329643	GPX3	5	2878		GSHPx-P	GSHPx-3	GPx-P
SMTN	0.447933	505.265	689.225	0.00018209	SMTN	22	6525		FLJ38597	FLJ35365
UFM1	0.448355	889.713	1214	0.000314596	UFM1	13	51569		bA131P10.1	C13orf20	BM-002
PCOLCE2	0.448845	166.883	227.786	0.00231428	PCOLCE2	3	26577		PCPE2
C14orf100	0.449428	1051.06	1435.22	0.00812192	C14ORF100	14	51528		HSPC213	HSPC327
TBCC	0.449715	373	509.432	0.0229621	TBCC	6	6903		CFC
CAMK2N1	0.450005	5916.41	8082.08	6.18685e-05	CAMK2N1	1	55450		ICAP-1alpha	MGC22256	PRO1489	RP11-401M16.1
NINJ1	0.450256	856.821	1170.66	4.03024e-06	NINJ1	9	4814		NIN1	NINJURIN
TMEM93	0.451217	1143.61	1563.54	0.00154967	TMEM93	17	83460		MGC2963
INA	0.451629	503.621	688.744	0.0324241	INA	10	9118		NF-66	NEF5	MGC12702	TXBP-1
SEMA5A	0.452316	202.068	276.476	3.67187e-05	SEMA5A	5	9037		semF	SEMAF
CXXC5	0.452881	1364.29	1867.4	0.00198046	CXXC5	5	51523		HSPC195
UCP2	0.452927	345.2	472.515	0.000306407	UCP2	11	7351		SLC25A8	UCPH
JUP	0.453072	190.847	261.26	7.19385e-05	JUP	17	3728		PKGB	CTNNG	ARVD12	PDGB	DPIII	DP3
SCAMP3	0.453156	981.601	1343.84	1.82488e-05	SCAMP3	1	10067		C1orf3
RAB21	0.453541	599.935	821.55	0.0219525	RAB21	12	23011		KIAA0118
CDH6	0.454283	570.067	781.05	6.44744e-06	CDH6	5	1004		KCAD
IFFO1	0.455341	646.251	886.079	0.000135366	IFFO1	12	25900		HOM-TES-103	DKFZP586I2223	MGC117359	FLJ20703
NP	0.455533	389.24	533.761	0.00534103	NP	14	4860		PNP	PUNP	MGC125916	MGC125915	MGC117396	PRO1837
GAS6	0.456004	7580.67	10398.7	7.56495e-05	GAS6	13	2621		FLJ34709	AXLLG	AXSF	DKFZp666G247
ANGPTL4	0.45609	186.687	256.101	3.10702e-12	ANGPTL4	19	51129		HFARP	ANGPTL2	PGAR	NL2	pp1158	ARP4	FIAF
LRPAP1	0.456507	766.548	1051.87	0.00857411	LRPAP1	4	4043		MGC138272	A2MRAP	RAP	HBP44	A2RAP	MRAP
REEP2	0.457816	356.447	489.565	0.000279831	REEP2	5	51308		SGC32445	C5orf19
NTAN1	0.457881	1715.96	2356.91	0.000516552	NTAN1	16	123803		DKFZp666E058
FLOT1	0.458752	1593.28	2189.73	4.53134e-06	FLOT1	6	10211
MANBA	0.458755	283.575	389.733	0.0096062	MANBA	4	4126		MANB1
MNT	0.459886	380.288	523.061	1.09809e-05	MNT	17	4335		MXD6	ROX	MAD6
ITGA2	0.46052	1258.69	1732	5.89661e-05	ITGA2	5	3673		CD49B	VLAA2	VLA-2	BR	GPIa
HLA-A29.1	0.461067	671.415	924.243	1.85591e-08	HLA-A29.1		649853
DPP4	0.461259	203.489	280.153	0.0196032	DPP4	2	1803		CD26	DPPIV	ADCP2	ADABP	TP103
C5orf62	0.461378	257.474	354.505	0.0233798	C5ORF62	5	85027		NID67	MGC126887	MGC126889	MGC117221
RAB40B	0.461733	460.005	633.516	0.02403	RAB40B	17	10966		FLJ42385	SEC4L	RAR
DEDD2	0.462372	540.594	744.834	0.000113367	DEDD2	19	162989		FLAME-3
TMEM9B	0.463481	1182.88	1631.04	1.00676e-07	TMEM9B	11	56674		C11orf15
SH3BGRL3	0.463822	4488.4	6190.35	4.10007e-09	SH3BGRL3	1	83442		TIP-B1	SH3BP-1
NME3	0.46394	610.186	841.632	1.90186e-08	NME3	16	4832		NDPKC	NDPK-C	c371H6.2	NM23-H3	KIAA0516	DR-nm23
FILIP1L	0.464118	425.77	587.338	0.00315041	FILIP1L	3	11259		DOC-1	GIP90	DOC1
PELO	0.464367	3030.47	4181.18	2.14852e-06	PELO	5	53918		PRO1770	CGI-17
TMEM147	0.466341	1850.81	2557.07	0.00204021	TMEM147	19	10430		MGC1936	NIFIE14
COQ10B	0.466688	1388.07	1918.23	0.00662194	COQ10B	2	80219		FLJ13448
GPRC5A	0.466746	189.348	261.677	0.00297736	GPRC5A	12	9052		RAIG1	RAI3	GPCR5A
TSPAN3	0.467971	1737.76	2403.61	8.79769e-08	TSPAN3	15	10099		TM4-A	TSPAN-3	TM4SF8
PNKP	0.46834	852.171	1178.99	0.00853998	PNKP	19	11284		PNK
TBCB	0.468507	2601.61	3599.78	0.000270129	TBCB	19	1155		CG22	MGC14625	CKAPI	CKAP1
SHISA5	0.469584	2827.21	3914.87	3.36684e-08	SHISA5	3	51246
CTPS	0.469721	1062.97	1472.04	8.09355e-05	CTPS	1	1503
ARHGAP24	0.470153	237.633	329.182	1.244e-09	ARHGAP24	4	83478		FILGAP	p73RhoGAP	FLJ33877	RC-GAP72	DKFZP564B1162	p73	RCGAP72
AEBP1	0.471454	572.072	793.182	3.29224e-07	AEBP1	7	165		FLJ33612	ACLP
NICN1	0.47195	448.894	622.608	3.19013e-08	NICN1	3	84276		MGC12936
SLC12A4	0.472458	398.006	552.222	1.78994e-06	SLC12A4	16	6560		FLJ40489	KCC1
HSPB8	0.472863	423.048	587.132	0.000253375	HSPB8	12	26353		HMN2	E2IG1	HMN2A	H11	DHMN2	HSP22	CMT2L
MSRB3	0.472911	860.258	1193.96	0.000999713	MSRB3	12	253827		FLJ36866	DKFZp686C1178
C19orf28	0.473213	244.314	339.156	0.000112267	C19ORF28	19	126321		MGC20700	PP3501
LIN7B	0.473536	183.084	254.213	0.00181709	LIN7B	19	64130		LIN-7B	MALS-2	VELI2
KCNF1	0.473968	290.172	403.027	0.0273855	KCNF1	2	3754		kH1	IK8	KCNF	KV5.1	MGC33316
CABLES1	0.474792	395.04	548.995	7.4239e-08	CABLES1	18	91768		FLJ35924	HsT2563
ATP5D	0.475498	1618.36	2250.16	0.016692	ATP5D	19	513
ADAMTSL4	0.476125	196.822	273.78	5.49194e-07	ADAMTSL4	1	54507		TSRC1
FAM107B	0.476543	1646.55	2291.02	4.44477e-06	FAM107B	10	83641		FLJ45505	C10orf45	MGC11034	MGC90261
PRICKLE2	0.476756	443.221	616.791	2.37559e-08	PRICKLE2	3	166336		DKFZp686M031	DKFZp686D143	DKFZp686H1748
PHLDA3	0.476935	608.92	847.485	0.021904	PHLDA3	1	23612		TIH1
NES	0.47783	1683.36	2344.33	0.0404195	NES	1	10763		FLJ21841	Nbla00170
WDR37	0.477896	448.327	624.391	0.00036568	WDR37	10	22884		KIAA0982	RP11-529L18.2	FLJ40354
ADCY9	0.478034	411.607	573.304	0.000230088	ADCY9	16	115
LOC88523	0.478079	340.077	473.69	0.0001293	LOC88523	13	88523
RRAS	0.478632	2779.93	3873.61	7.85604e-06	RRAS	19	6237
HIST1H4H	0.478816	171.169	238.541	0.00040352	HIST1H4H	6	8365		H4FH	H4/h
SMPD1	0.478875	376.683	524.967	9.11558e-05	SMPD1	11	6609		ASM	NPD
C19orf6	0.479064	502.801	700.824	0.0042568	C19ORF6	19	91304		R32184_3	ASBABP1	MGC4022
CUEDC2	0.479412	1078.48	1503.59	1.91303e-09	CUEDC2	10	79004		bA18I14.5	C10orf66	MGC2491
VAMP3	0.479558	2540.97	3542.92	0.000983658	VAMP3	1	9341		CEB
LYPD1	0.482159	2139.55	2988.59	3.88187e-06	LYPD1	2	116372		MGC29643	PHTS	FLJ41033	LYPDC1
CORO1B	0.482842	651.746	910.811	4.1114e-06	CORO1B	11	57175		CORONIN-2	DKFZP762I166
STOML1	0.482993	273.228	381.874	0.0098432	STOML1	15	9399		hUNC-24	STORP	FLJ36370	SLP-1
IGFBP5	0.483998	11958.6	16725.5	0.000136446	IGFBP5	2	3488		IBP5
C5orf53	0.484307	233.595	326.779	2.60938e-05	C5ORF53	5	492311
ATP6AP2	0.484796	3128.05	4377.36	3.04115e-07	ATP6AP2	X	10159		ELDF10	APT6M8-9	MGC99577	XMRE	M8-9	ATP6IP2	MSTP009	MRXE	HT028	ATP6M8-9
FBXL15	0.485084	208.064	291.22	0.0137823	FBXL15	10	79176		FLJ16137	Fbl15	MGC11279	FBXO37	PSD
RUSC2	0.485454	425.802	596.134	0.00014817	RUSC2	9	9853		KIAA0375	Iporin
MGC71993	0.486901	2235.31	3132.64	7.07128e-05	MGC71993		440400
TMEM66	0.487807	3146.64	4412.56	5.68341e-10	TMEM66	8	51669		FLJ22274	FOAP-7	MGC8721	HSPC035	XTP3
SH3PXD2A	0.491517	1564.57	2199.66	0.000534616	SH3PXD2A	10	9644		SH3MD1	FISH
TOX2	0.491847	724.11	1018.27	0.000174679	TOX2	20	84969		dJ1108D11.2	MGC15880	C20orf100	GCX-1	dJ495O3.1
RALY	0.492252	1201.54	1690.13	2.11739e-06	RALY	20	22913		P542	MGC117312	HNRPCL2
SLC10A3	0.492463	461.592	649.389	0.00477986	SLC10A3	X	8273		DXS253E	P3
PEX19	0.49291	628.46	884.419	0.00181819	PEX19	1	5824		D1S2223E	PXF	PMPI	HK33	PXMP1	PMP1
GOLPH4	0.492989	982.12	1382.19	0.00917366	GOLPH4	3	27333		P138	GIMPC	GPP130
RNASEK	0.496057	2899.83	4089.79	0.00763216	RNASEK	17	440400		MGC71993
FAM127A	0.496088	4118.27	5808.34	0.00492134	FAM127A	X	8933		CXX1	MAR8C	MART8C	MGC117411	Mar8	Mart8
HSPBL2	0.496244	1163.77	1641.54	2.45818e-06	HSPBL2	9	653553
HES4	0.497243	730.098	1030.54	8.13025e-10	HES4	1	57801
TMBIM1	0.497887	593.956	838.751	0.0366118	TMBIM1	2	64114		PP1201	MST100	RECS1	MSTP100
MLLT11	0.499205	3212.41	4540.53	0.00129479	MLLT11	1	10962		AF1Q	RP11-316M1.10
YPEL5	0.500595	1327.26	1877.81	9.40687e-05	YPEL5	2	51646		CGI-127
ADAM15	0.500886	684.199	968.198	0.000729439	ADAM15	1	8751		MDC15
M6PRBP1	0.501217	9340.76	13221	1.03005e-05	M6PRBP1	19	10226		MGC2012	TIP47	PP17	MGC11117
DLGAP4	0.501415	428.747	606.934	0.0443531	DLGAP4	20	22839		RP5-977B1.6	KIAA0964	MGC131862	SAPAP4	DAP4
CDIPT	0.502934	490.779	695.479	0.000241921	CDIPT	16	10423		PIS1	PIS	MGC1328
ATP6V0A1	0.503099	1041.29	1475.77	0.000128881	ATP6V0A1	17	535		ATP6N1	VPP1	DKFZp781J1951	Stv1	a1	ATP6N1A	Vph1
DHRS1	0.503964	1059.4	1502.34	2.44482e-10	DHRS1	14	115817		FLJ25430	MGC20204
[truncated: 274 more rows]

## Sheet: P10-P24 ME
SYMBOL	FOLD	P10_0Gy.AVG_Beta	P24_0Gy.AVG_Beta	P24_0Gy.DiffScore	P24_0Gy.Detection Pval	NAME	ACCESSION	GENE_ID	CHR	MAPINFO	TSS_COORDINATE	DISTANCE_TO_TSS	CPG_ISLAND	CPG_ISLAND_LOCATIONS	MIR_CPG_ISLAND	MIR_NAMES	SYNONYM
GFPT2	2.48294	0.026206	0.146501	49.0123	3.678e-38	cg18602314	NM_005110.1	GeneID:9945	5	179713408	179712921	487	TRUE	5:179711599-179713980			GFAT2
SPINT2	2.35793	0.0494639	0.253568	94.5712	3.678e-38	cg15375239	NM_021102.2	GeneID:10653	19	43447127	43447042	85	TRUE	19:43446599-43447858			PB	Kop	HAI2	HAI-2
TUBB2B	2.32286	0.0414077	0.207172	71.8704	3.678e-38	cg03462055	NM_178012.3	GeneID:347733	6	3172555	3172870	315	TRUE	6:3171849-3175236			MGC8685	bA506K6.1	DKFZp566F223	RP11-506K6.1	TUBB-PARALOG
GPR150	2.22861	0.0523878	0.245533	85.595	3.678e-38	cg02320454	NM_199243.1	GeneID:285601	5	94981773	94981736	37	TRUE	5:94981212-94983154			PGR11
HPCAL4	2.21699	0.0186409	0.0866659	20.6383	3.678e-38	cg22827640	NM_016257.2	GeneID:51440	1	39929712	39929676	36	TRUE	1:39929406-39930055			HLP4	DKFZp761G122
EIF1AX	2.20733	0.0570853	0.26363	92.7392	3.678e-38	cg14354749	NM_001412.3	GeneID:1964	X	20069990	20069887	103	TRUE	X:20069197-20070982			EIF1A	EIF4C	eIF-1A	eIF-4C
RASSF1	2.19634	0.0659483	0.30225	110.423	3.678e-38	cg08047457	NM_007182.4	GeneID:11186	3	50353417	50353371	46	TRUE	3:50352707-50353696			123F2	RDA32	NORE2A	RASSF1A	REH3P21
SPAG1	2.15787	0.046992	0.209704	67.4559	3.678e-38	cg27537600	NM_003114.3	GeneID:6674	8	101239567	101239439	128	TRUE	8:101238713-101240129			SP75	TPIS	HSD-3.8	FLJ32920
GADD45G	2.12341	0.0407121	0.177392	53.5176	3.678e-38	cg20070077	NM_006705.2	GeneID:10912	9	91409815	91409748	67	TRUE	9:91409464-91411301			CR6	DDIT2	GRP17	GADD45gamma
ADCY1	2.10713	0.0498213	0.214647	67.6607	3.678e-38	cg07651242	NM_021116.1	GeneID:107	7	45581245	45580646	599	TRUE	7:45579547-45582131
IGFBP2	2.08328	0.0554049	0.234789	74.8842	3.678e-38	cg25854162	NM_000597.2	GeneID:3485	2	217205862	217206372	510	TRUE	2:217205664-217207225			IBP2	IGF-BP53
LIPG	2.07652	0.0656624	0.276956	92.4993	3.678e-38	cg21574400	NM_006033.2	GeneID:9388	18	45342307	45342425	118	TRUE	18:45340923-45342671			EL	EDL	PRO719
RASSF1	2.07389	0.0417768	0.175888	51.6508	3.678e-38	cg21554552	NM_007182.4	GeneID:11186	3	50353429	50353371	58	TRUE	3:50352707-50353696			123F2	RDA32	NORE2A	RASSF1A	REH3P21
CACNB3	2.05933	0.0195768	0.0815947	17.309	3.678e-38	cg23921699	NM_000725.2	GeneID:784	12	47498828	47498779	49	TRUE	12:47498031-47499203			CACNLB3
WIF1	2.01604	0.0367968	0.148833	40.232	3.678e-38	cg19427610	NM_007191.2	GeneID:11197	12	63801298	63801356	58	TRUE	12:63801033-63802623			WIF-1
RAP1GA1	1.99542	0.0787299	0.313921	103.852	3.678e-38	cg22396755	NM_002885.1	GeneID:5909	1	21867684	21868386	702	TRUE	1:21867575-21867913			RAP1GAP	KIAA0474	rap1GAPII
LHX2	1.98742	0.0605623	0.240146	72.9446	3.678e-38	cg07109287	NM_004789.3	GeneID:9355	9	125813894	125813710	184	TRUE	9:125813052-125815466			LH2	hLhx2
KRT19	1.98713	0.0839067	0.332646	111.953	3.678e-38	cg11462865	NM_002276.3	GeneID:3880	17	36937650	36938160	510	TRUE	17:36937180-36938240			K19	CK19	K1CS	MGC15366
ERBB2	1.97887	0.0493099	0.194372	55.5559	3.678e-38	cg09875273	NM_004448.2	GeneID:2064	17	35097513	35097919	406	TRUE	17:35097487-35098143			NEU	NGL	HER2	TKR1	HER-2	c-erb B2	HER-2/neu
LRP8	1.97345	0.0281654	0.110607	25.9662	3.678e-38	cg02502132	NM_017522.3	GeneID:7804	1	53565527	53566409	882	TRUE	1:53564070-53566625			APOER2	HSZ75190
IRF8	1.9695	0.0473838	0.185571	52.1197	3.678e-38	cg24826867	NM_002163.2	GeneID:3394	16	84490354	84490275	79	TRUE	16:84489299-84490591			ICSBP	IRF-8	ICSBP1	H-ICSBP
SLC13A5	1.95342	0.043669	0.169127	45.7782	3.678e-38	cg22040627	NM_177550.2	GeneID:284111	17	6557754	6557388	366	TRUE	17:6556978-6558390			NACT	MGC138356	DKFZp686E17257
PARK2	1.94807	0.055344	0.213549	61.4782	3.678e-38	cg21926612	NM_004562.1	GeneID:5071	6	163069159	163068793	366	FALSE			cg21926612	PDJ	PRKN	AR-JP
ACADM	1.94188	0.0218055	0.0837778	16.8043	3.678e-38	cg05467918	NM_000016.2	GeneID:34	1	75962533	75962870	337	TRUE	1:75962418-75963438			MCAD	ACAD1	MCADH
E2F2	1.94103	0.0628873	0.241475	71.5303	3.678e-38	cg23574449	NM_004091.2	GeneID:1870	1	23729810	23730300	490	TRUE	1:23729519-23730740			E2F-2
SLC27A2	1.92484	0.0739641	0.280838	86.111	3.678e-38	cg13021384	NM_003645.2	GeneID:11001	15	48262046	48261714	332	TRUE	15:48261381-48262610			VLCS	FATP2	VLACS	ACSVL1	FACVL1	hFACVL1	HsT17226
ALOX15	1.90523	0.050835	0.190412	51.7482	3.678e-38	cg09872233	NM_001140.3	GeneID:246	17	4491674	4491709	35	TRUE	17:4489288-4492318
L3MBTL4	1.90283	0.0561052	0.209804	58.4618	3.678e-38	cg17688525	NM_173464.1	GeneID:91133	18	6404978	6404901	77	TRUE	18:6403816-6405200			HsT1031
LOC387758	1.88881	0.0797419	0.295307	89.8361	3.678e-38	cg04622802	NM_203371.1	GeneID:387758	11	26972448	26972204	244	TRUE	11:26972301-26972579			MGC24932
MOS	1.87738	0.0532179	0.195527	52.5575	3.678e-38	cg22411207	NM_005372.1	GeneID:4342	8	57188855	57189095	240	TRUE	8:57187963-57189242			MSV	MGC119962	MGC119963
CD8B1	1.87615	0.0778662	0.285843	85.3892	3.678e-38	cg26850754	NM_004931.2	GeneID:926	2	86942307	86942549	242	TRUE	2:86942147-86942826			Ly3	CD8B	LYT3	Leu2	MGC119115
LOC401498	1.86648	0.0490755	0.17895	46.563	3.678e-38	cg11308840	NM_212558.1	GeneID:401498	9	32773516	32773497	19	TRUE	9:32772777-32774000			FLJ43330	DKFZp686I2292
SLC34A2	1.86544	0.0353956	0.128974	30.154	3.678e-38	cg19616230	NM_006424.1	GeneID:10568	4	25266527	25266571	44	TRUE	4:25266077-25266795			NPTIIb	NAPI-3B	FLJ90534	NAPI-IIb
SCAMP3	1.83827	0.0448808	0.160486	39.7837	3.678e-38	cg01745448	NM_005698.2	GeneID:10067	1	153499003	153498819	184	TRUE	1:153498335-153499113			C1orf3
CDKL2	1.83548	0.0428031	0.15276	37.1411	3.678e-38	cg14988503	NM_003948.2	GeneID:8999	4	76774571	76774595	24	TRUE	4:76774245-76775285			P56	KKIAMRE
TBC1D10B	1.82419	0.0248708	0.0880698	16.8136	3.678e-38	cg25463428	NM_015527.2	GeneID:26000	16	30288610	30288402	208	TRUE	16:30288517-30289737			FP2461	DKFZP434P1750
NEUROG1	1.8165	0.0403442	0.142103	33.263	3.678e-38	cg11248413	NM_006161.2	GeneID:4762	5	134899557	134899538	19	TRUE	5:134898284-134900130			AKA	ngn1	Math4C	NEUROD3
FZD3	1.79881	0.0461881	0.160703	38.7386	3.678e-38	cg11710000	NM_017412.2	GeneID:7976	8	28408478	28407692	786	TRUE	8:28407045-28408515			Fz-3	hFz3
NOXO1	1.7857	0.126473	0.43606	329.938	3.678e-38	cg00043004	NM_144603.2	GeneID:124056	16	1970893	1971441	548	TRUE	16:1968853-1971062			P41NOX	P41NOXA	P41NOXB	P41NOXC	SH3PXD5	MGC20258
PTOV1	1.77552	0.0478843	0.163938	39.1161	3.678e-38	cg08064891	NM_017432.2	GeneID:53635	19	55047066	55046294	772	TRUE	19:55045182-55047484			MGC71475	DKFZP586I111
EMILIN3	1.76133	0.0722067	0.244788	64.3834	3.678e-38	cg18938204	NM_052846.1	GeneID:90187	20	39428271	39428912	641	TRUE	20:39427979-39429312			EMILIN5	C20orf130	dJ620E11.4	DKFZp434A2410
CECR6	1.73694	0.116356	0.387846	117.928	3.678e-38	cg12373771	NM_031890.2	GeneID:27439	22	15981381	15982143	762	TRUE	22:15980487-15983038
THBD	1.7268	0.0734261	0.243035	62.2284	3.678e-38	cg24562819	NM_000361.2	GeneID:7056	20	22977806	22978301	495	TRUE	20:22976034-22978669			TM	THRM	CD141
CRMP1	1.72404	0.0255802	0.0845066	14.611	3.678e-38	cg03544320	NM_001313.3	GeneID:1400	4	5945592	5945686	94	TRUE	4:5944246-5946191			DRP1	DRP-1	DPYSL1
MCAM	1.72018	0.101048	0.332931	93.5277	3.678e-38	cg21096399	NM_006500.2	GeneID:4162	11	118693355	118693050	305	TRUE	11:118692068-118693386			CD146	MUC18
ENDOG	1.71095	0.0390083	0.127704	26.5996	3.678e-38	cg04621255	NM_004435.2	GeneID:2021	9	130621219	130620600	619	TRUE	9:130619231-130621779
ROR2	1.70864	0.05199	0.16993	38.9968	3.678e-38	cg25766046	NM_004560.2	GeneID:4920	9	93751943	93752265	322	TRUE	9:93750567-93753002			BDB	BDB1	NTRKR2
CALCB	1.70423	0.0649721	0.211715	51.4348	3.678e-38	cg08896945	NM_000728.3	GeneID:797	11	15051644	15051722	78	TRUE	11:15051395-15052633			CALC2	CGRP2	CGRP-II	FLJ30166
SLC16A13	1.70183	0.0456748	0.148586	32.4895	3.678e-38	cg24173049	NM_201566.1	GeneID:201232	17	6880519	6880426	93	TRUE	17:6879756-6880862
ACE	1.68831	0.0478763	0.154295	33.754	3.678e-38	cg02131967	NM_152830.1	GeneID:1636	17	58907838	58908166	328	TRUE	17:58907492-58908940			DCP	ACE1	DCP1	CD143	MGC26566
FRMPD1	1.68575	0.0552696	0.177807	40.6376	3.678e-38	cg16235034	NM_014907.1	GeneID:22844	9	37640629	37641052	423	TRUE	9:37640579-37641558			FRMD2	KIAA0967	RP11-263I4.1
CALB1	1.68321	0.056402	0.18113	41.4732	3.678e-38	cg12402251	NM_004929.2	GeneID:793	8	91163987	91164283	296	TRUE	8:91163956-91164434			CALB
DGKE	1.66063	0.0578626	0.182936	41.2831	3.678e-38	cg01344452	NM_003647.1	GeneID:8526	17	52267142	52266552	590	TRUE	17:52265332-52267632			DGK	DAGK6
GMPPB	1.65268	0.0495811	0.155891	33.263	3.678e-38	cg15565533	NM_013334.2	GeneID:29925	3	49736940	49736388	552	TRUE	3:49735775-49737071			KIAA1851
GPR176	1.65059	0.0365541	0.114766	21.8841	3.678e-38	cg17497271	NM_007223.1	GeneID:11245	15	38000073	38000385	312	TRUE	15:37998925-38000826			GPR	Gm1012
TRAF3	1.6496	0.0929951	0.291768	74.0726	3.678e-38	cg24165760	NM_003300.2	GeneID:7187	14	102313142	102313569	427	TRUE	14:102312745-102314619			LAP1	CAP-1	CRAF1	CD40bp
C16orf51	1.64675	0.0399925	0.125227	24.593	3.678e-38	cg14711709	NM_015421.1	GeneID:25880	16	8798792	8798991	199	TRUE	16:8798650-8799537			DKFZP564K2062
TERT	1.64131	0.0593988	0.185294	41.2998	3.678e-38	cg02545192	NM_198253.1	GeneID:7015	5	1347729	1348159	430	TRUE	5:1345899-1349472			TP2	TRT	EST2	TCS1	hEST2
PTPRT	1.63857	0.0698389	0.217449	50.4855	3.678e-38	cg04541293	NM_133170.2	GeneID:11122	20	41252539	41251971	568	TRUE	20:41249910-41252787			RPTPrho	KIAA0283
NKX2-8	1.63795	0.0873187	0.271756	66.9179	3.678e-38	cg17685628	NM_014360.2	GeneID:26257	14	36121444	36121537	93	TRUE	14:36118956-36123512			NKX2H	NKX2.8	Nkx2-9
L3MBTL4	1.6308	0.0935422	0.289687	72.2186	3.678e-38	cg14155416	NM_173464.1	GeneID:91133	18	6404330	6404901	571	TRUE	18:6403816-6405200			HsT1031
FAM101A	1.62875	0.0389382	0.120415	22.9754	3.678e-38	cg21453309	NM_181709.2	GeneID:144347	12	123340008	123339663	345	FALSE			cg21453309	FLJ44614
SEC31L2	1.62253	0.0951904	0.293104	72.8683	3.678e-38	cg20831708	NM_015490.3	GeneID:25956	10	102269363	102269585	222	TRUE	10:102268974-102269882			SEC31B-1	DKFZP434M183
NTSR1	1.61952	0.0595393	0.182948	39.9417	3.678e-38	cg03567830	NM_002531.1	GeneID:4923	20	60810316	60810634	318	TRUE	20:60810126-60811791			NTR
ATP1B2	1.59719	0.0298674	0.0903649	14.6164	3.678e-38	cg10043101	NM_001678.3	GeneID:482	17	7494865	7494979	114	TRUE	17:7494494-7496173			AMOG
KCNIP1	1.59634	0.0577384	0.174587	36.8096	3.678e-38	cg08422599	NM_014592.2	GeneID:30820	5	169863670	169863626	44	TRUE	5:169863374-169864167			VABP	MGC95	KCHIP1
VWA1	1.58847	0.0539007	0.162096	33.1758	3.678e-38	cg25234611	NM_022834.3	GeneID:64856	1	1361210	1360772	438	TRUE	1:1360547-1361469			WARP	VWA-1	FLJ22215	DKFZp761O051
NTRK2	1.5766	0.0688089	0.205233	44.4817	3.678e-38	cg22402007	NM_001007097.1	GeneID:4915	9	86472643	86473286	643	TRUE	9:86472369-86475721			TRKB	GP145-TrkB
HDAC11	1.57602	0.0443132	0.132118	24.9437	3.678e-38	cg22319470	NT_022517.17	GeneID:79885	3	13496370			TRUE	3:13495978-13497310			FLJ22237
C1orf188	1.56928	0.118528	0.351738	89.1741	3.678e-38	cg15731815	NM_173795.2	GeneID:148646	1	6191847	6191507	340	TRUE	1:6190892-6192286			FLJ32096
ZAK	1.56796	0.092734	0.274942	63.9102	3.678e-38	cg03608974	NM_133646.1	GeneID:51776	2	173648514	173648816	302	TRUE	2:173648485-173649935			MLTK	mlklak
CHST13	1.56708	0.068219	0.202136	43.2546	3.678e-38	cg07745434	NM_152889.1	GeneID:166012	3	127726091	127725866	225	TRUE	3:127725561-127726214			C4ST3	MGC119278	MGC119279	MGC119281
NKIRAS2	1.55794	0.0330241	0.0972341	15.8251	3.678e-38	cg24505527	NM_017595.4	GeneID:28511	17	37422426	37422564	138	TRUE	17:37422112-37423341			KBRAS2	MGC74742	kappaB-Ras2	DKFZP434N1526
IGF2AS	1.55274	0.130325	0.382339	99.1481	3.678e-38	cg11005826	NT_009237.17	GeneID:51214	11	2122537			TRUE	11:2121548-2122565			PEG8
PLEKHQ1	1.54996	0.0419991	0.122977	22.1161	3.678e-38	cg15083227	NM_025201.3	GeneID:80301	15	62920342	62921186	844	FALSE			cg15083227	PP1628	pp9099	DKFZp761K2312
POU3F3	1.54272	0.0770774	0.224559	48.3396	3.678e-38	cg20291049	NM_006236.1	GeneID:5455	2	104838649	104838401	248	TRUE	2:104835039-104840521			BRN1	OTF8
RAB6IP2	1.53636	0.0443152	0.128542	23.2221	3.678e-38	cg17416608	NM_178037.1	GeneID:23085	12	971305	970665	640	TRUE	12:969736-971609			ELKS	ERC1	Cast2	MGC12974
GCNT1	1.5303	0.089857	0.259547	57.4749	3.678e-38	cg22289360	NM_001490.3	GeneID:2650	9	78263728	78263966	238	TRUE	9:78263598-78264533			G6NT	C2GNT	NACGT2	NAGCT2	C2GNT-L	MGC126335	MGC126336
ZNF546	1.52315	0.084325	0.242365	52.3469	3.678e-38	cg14213992	NM_178544.2	GeneID:339327	19	45195198	45194869	329	TRUE	19:45194206-45195268			MGC43537
IRX3	1.51989	0.0710038	0.203617	41.8173	3.678e-38	cg24662961	NM_024336.1	GeneID:79191	16	52878171	52877879	292	TRUE	16:52875064-52879466			IRX-1
FLT4	1.51903	0.0826858	0.236976	50.6868	3.678e-38	cg00489401	NM_182925.1	GeneID:2324	5	180008481	180009172	691	TRUE	5:180008152-180010059			PCL	FLT41	VEGFR3
CHAD	1.51064	0.111776	0.318489	73.6373	3.678e-38	cg06958829	NM_001267.1	GeneID:1101	17	45901117	45901322	205	TRUE	17:45900488-45902050			SLRR4A
TSPAN13	1.51006	0.0595417	0.169588	32.8112	3.678e-38	cg03214212	NM_014399.3	GeneID:27075	7	16759859	16759876	17	TRUE	7:16759606-16760776			NET-6	TM4SF13	FLJ22934
NFE2L3	1.50236	0.0641814	0.181829	35.6587	3.678e-38	cg14534464	NM_004289.5	GeneID:9603	7	26158158	26158385	227	TRUE	7:26157838-26159762			NRF3
ZNF236	1.50111	0.0978837	0.27707	60.8558	3.678e-38	cg15059932	NM_007345.1	GeneID:7776	18	72664221	72665104	883	TRUE	18:72662639-72664433			ZNF236A	ZNF236B
CYP24A1	1.49634	0.0869424	0.245288	51.8082	3.678e-38	cg18956481	NM_000782.3	GeneID:1591	20	52223546	52223931	385	TRUE	20:52222583-52223813			CP24	CYP24	MGC126273	MGC126274	P450-CC24
LSR	1.49556	0.033586	0.0947034	14.3154	3.678e-38	cg02915261	NM_205835.2	GeneID:51599	19	40431602	40431399	203	TRUE	19:40430224-40432569			LISCH7	MGC10659	MGC48312	MGC48503
CDX2	1.49188	0.0752816	0.211734	42.7973	3.678e-38	cg02055963	NM_001265.2	GeneID:1045	13	27441520	27441317	203	TRUE	13:27440079-27441627			CDX3	CDX-3
SLITRK3	1.48292	0.0398539	0.111397	18.0625	3.678e-38	cg13619915	NM_014926.2	GeneID:22865	3	166397131	166397163	32	TRUE	3:166396716-166397896			KIAA0848
GDNF	1.47378	0.0766452	0.212881	42.3718	3.678e-38	cg07442479	NM_000514.2	GeneID:2668	5	37875526	37875539	13	TRUE	5:37874803-37876645			ATF1	ATF2	HFB1-GDNF
CENTA2	1.46946	0.112516	0.311578	68.6579	3.678e-38	cg05052633	NM_018404.1	GeneID:55803	17	26273611	26273059	552	TRUE	17:26272783-26274166			cent-b	HSA272195
MYOD1	1.46218	0.0815232	0.224617	44.8082	3.678e-38	cg18555440	NM_002478.3	GeneID:4654	11	17698263	17697735	528	TRUE	11:17696873-17700534			PUM	MYF3	MYOD
FLJ37478	1.45038	0.0602974	0.16478	29.789	3.678e-38	cg08211091	NM_178557.2	GeneID:339983	4	2031721	2031385	336	TRUE	4:2029497-2032981			MGC117272
NFAM1	1.44629	0.0635811	0.173263	31.6779	3.678e-38	cg17568996	NM_145912.4	GeneID:150372	22	41158069	41158340	271	FALSE			cg17568996	CNAIP	FLJ40652
KDELR1	1.43751	0.107	0.289812	60.6491	3.678e-38	cg18678185	NM_006801.2	GeneID:10945	19	53586842	53586622	220	TRUE	19:53586584-53586881			ERD2	HDEL	PM23	ERD2.1
RTBDN	1.43722	0.0636693	0.172416	31.1592	3.678e-38	cg08694544	NM_031429.1	GeneID:83546	19	12807228	12807230	2	TRUE	19:12807041-12808465
COX5B	1.43534	0.0370384	0.100169	14.6491	3.678e-38	cg01568335	NM_001862.2	GeneID:1329	2	97628677	97628953	276	TRUE	2:97628311-97629884			COXVB
RANBP2	1.41876	0.0835439	0.223359	42.5602	3.678e-38	cg08733774	NM_006267.3	GeneID:5903	2	108702059	108702369	310	TRUE	2:108701097-108703275			TRP1	TRP2	NUP358
PIR	1.41437	0.0823899	0.219605	41.4928	3.678e-38	cg09250703	NM_003662.2	GeneID:8544	X	15421672	15421385	287	TRUE	X:15421076-15421731
RND2	1.41386	0.057269	0.152592	25.9215	3.678e-38	cg05270634	NM_005440.3	GeneID:8153	17	38430971	38430791	180	TRUE	17:38429704-38431262			ARHN	RHO7	RhoN
TMEM55A	1.41075	0.0606826	0.16134	27.8094	3.678e-38	cg06688396	NM_018710.1	GeneID:55529	8	92122609	92122227	382	FALSE			cg06688396	DKFZp762O076
TRIM35	1.40991	0.0416343	0.110631	16.5883	3.678e-38	cg21443261	NM_171982.2	GeneID:23087	8	27225173	27224751	422	TRUE	8:27224011-27225184			HLS5	MAIR	KIAA1098	MGC17233
SPIN1	1.40947	0.05728	0.152158	25.7289	3.678e-38	cg11115702	NM_032038.1	GeneID:83985	16	28894199	28893650	549	TRUE	16:28892911-28894468			SPINL	PP2030	FLJ38358
HPSE2	1.40723	0.107527	0.285191	57.4749	3.678e-38	cg03388193	NM_021828.2	GeneID:60495	10	100986060	100985609	451	TRUE	10:100985526-100986619			HPA2	HPR2
TIRAP	1.40433	0.117131	0.310041	63.8849	3.678e-38	cg26202340	NM_052887.2	GeneID:114609	11	125657567	125658212	645	TRUE	11:125657511-125658777			Mal	wyatt	FLJ42305
ESR1	1.40341	0.0460214	0.121739	18.9212	3.678e-38	cg02720618	NT_025741.14	GeneID:2099	6	152171484			TRUE	6:152170010-152172178			ER	ESR	Era	ESRA	NR3A1	major ORF	DKFZp686N23123
HIST1H2BE	1.40298	0.0809465	0.21406	39.7826	3.678e-38	cg21146268	NM_003523.2	GeneID:8344	6	26291487	26292003	516	FALSE			cg21146268	H2B.h	H2B/h	H2BFH	H2BFN	dJ221C16.8
DPYSL5	1.39929	0.0807393	0.212968	39.3333	3.678e-38	cg12045002	NM_020134.2	GeneID:56896	2	26923479	26924469	990	TRUE	2:26923226-26926873			CRAM	CRMP5	Ulip6	CRMP-5
BRSK2	1.39143	0.0449682	0.117969	17.8664	3.678e-38	cg01468621	NM_003957.1	GeneID:9024	11	1368185	1367705	480	TRUE	11:1366566-1368933			SAD1	STK29	PEN11B	C11orf7
PEX11A	1.38705	0.0480821	0.125755	19.4202	3.678e-38	cg17732044	NM_003847.1	GeneID:8800	15	88035211	88034962	249	TRUE	15:88034009-88035393			PEX11-ALPHA
TSR1	1.38518	0.101062	0.263978	50.8466	3.678e-38	cg21870662	NM_018128.4	GeneID:55720	17	2188320	2187428	892	TRUE	17:2185926-2188447			FLJ10534	KIAA1401
LOC93343	1.38301	0.0482584	0.125864	19.3555	3.678e-38	cg14147105	NM_138401.2	GeneID:93343	19	17392148	17391912	236	TRUE	19:17391317-17392695
RUNX3	1.38286	0.112832	0.294249	58.3549	3.678e-38	cg00117172	NT_004610.18	GeneID:864	1	25128425			TRUE	1:25127692-25131906			AML2	CBFA3	PEBP2aC
SNX2	1.3797	0.116683	0.303626	60.6628	3.678e-38	cg17425616	NM_003100.2	GeneID:6643	5	122138390	122138649	259	TRUE	5:122138317-122139249			TRG-9	MGC5204
CCNA1	1.37388	0.159184	0.412554	92.7392	3.678e-38	cg12571423	NM_003914.2	GeneID:8900	13	35904748	35904633	115	TRUE	13:35903373-35904811
JUB	1.37166	0.0788911	0.204145	36.1557	3.678e-38	cg27601516	NM_032876.4	GeneID:84962	14	22522257	22521691	566	TRUE	14:22519595-22522334			Ajuba	MGC15563
EVX1	1.37162	0.0851553	0.220349	39.8956	3.678e-38	cg18397523	NM_001989.2	GeneID:2128	7	27248876	27248946	70	TRUE	7:27248572-27250267
TMOD2	1.37132	0.056312	0.145683	23.314	3.678e-38	cg00919857	NM_014548.2	GeneID:29767	15	49830550	49831102	552	TRUE	15:49830408-49831846			NTMOD	MGC39481
AXIN1	1.3638	0.0462229	0.11896	17.5198	3.678e-38	cg15001381	NM_181050.1	GeneID:8312	16	343315	342465	850	TRUE	16:341791-343515			AXIN	MGC52315
PHYHIPL	1.36227	0.100279	0.257807	48.0923	3.678e-38	cg25946758	NM_032439.1	GeneID:84457	10	60606031	60606353	322	TRUE	10:60605504-60607216			KIAA1796
ARVCF	1.36226	0.0734688	0.188879	32.4021	3.678e-38	cg22377998	NM_001670.1	GeneID:421	22	18384881	18384309	572	TRUE	22:18383358-18384977			FLJ35345
PKD2L1	1.36083	0.0799398	0.205312	36.0313	3.678e-38	cg05958582	NM_016112.2	GeneID:9033	10	102080356	102080233	123	FALSE			cg05958582	PCL	PKDL	PKD2L
NOC4L	1.35897	0.118092	0.302907	59.0869	3.678e-38	cg24211742	NM_024078.1	GeneID:79050	12	131193849	131194946	1097	TRUE	12:131193628-131195448			MGC3162
TBX21	1.35319	0.0692999	0.177045	29.4969	3.678e-38	cg20209009	NM_013351.1	GeneID:30009	17	43166321	43165609	712	TRUE	17:43165308-43166553			T-PET	T-bet	TBLYM
SST	1.35015	0.0809112	0.206274	35.8068	3.678e-38	cg02164046	NM_001048.3	GeneID:6750	3	188870842	188870895	53	TRUE	3:188870156-188871038			SMST
P2RY2	1.34629	0.090567	0.230273	41.0035	3.678e-38	cg04388983	NM_002564.2	GeneID:5029	11	72607492	72606992	500	TRUE	11:72606620-72607619			P2U	HP2U	P2U1	P2UR	P2Y2	P2RU1	P2Y2R	MGC20088	MGC40010
LETM1	1.34437	0.0476624	0.121024	17.5649	3.678e-38	cg10481740	NM_012318.1	GeneID:3954	4	1826901	1827772	871	TRUE	4:1826841-1828736
GLOXD1	1.33858	0.0582334	0.147274	22.807	3.678e-38	cg10164640	NM_032756.2	GeneID:84842	1	45565144	45565132	12	TRUE	1:45564893-45566022			MGC15668	RP4-534D1.1
DOLPP1	1.3342	0.0626992	0.158087	24.899	3.678e-38	cg01027739	NM_020438.3	GeneID:57171	9	130882559	130883227	668	TRUE	9:130882471-130883721			LSFR2
CHRNB1	1.31487	0.0438485	0.109086	14.5469	3.678e-38	cg04809787	NM_000747.2	GeneID:1140	17	7289063	7289130	67	TRUE	17:7288911-7290043			ACHRB	CHRNB	CMS1D	CMS2A	SCCMS
NXN	1.30983	0.0489635	0.121387	16.9042	3.678e-38	cg08785922	NM_022463.3	GeneID:64359	17	829581	829760	179	TRUE	17:828354-830334			TRG-4	FLJ12614
PDE2A	1.30571	0.0644298	0.159274	24.3181	3.678e-38	cg23792978	NM_002599.1	GeneID:5138	11	72063346	72063060	286	FALSE			cg23792978	PED2A4
HBXIP	1.29824	0.0581713	0.14306	20.9445	3.678e-38	cg20097268	NM_006402.2	GeneID:10542	1	110752135	110752069	66	TRUE	1:110751314-110752210			XIP	MGC71071
MADCAM1	1.29675	0.160948	0.395407	79.5176	3.678e-38	cg26525091	NM_130760.1	GeneID:8174	19	447239	447490	251	TRUE	19:447111-447347			MACAM1
NFXL1	1.29623	0.140345	0.344668	65.256	3.678e-38	cg06297145	NM_152995.3	GeneID:152518	4	47611799	47611412	387	TRUE	4:47610480-47611802			HOZFP
PAQR9	1.29508	0.0516375	0.126713	17.6816	3.678e-38	cg00970325	NM_198504.1	GeneID:344838	3	144165866	144164868	998	TRUE	3:144163706-144166078			FLJ41938
ICAM5	1.29008	0.146675	0.358683	68.5424	3.678e-38	cg11195002	NM_003259.2	GeneID:7087	19	10260805	10261655	850	TRUE	19:10260371-10267511			TLN	TLCN
ADCY1	1.28882	0.078099	0.190817	30.154	3.678e-38	cg13523557	NM_021116.1	GeneID:107	7	45580250	45580646	396	TRUE	7:45579547-45582131
MICAL1	1.28558	0.0520208	0.126816	17.4963	3.678e-38	cg05949660	NM_022765.2	GeneID:64780	6	109884335	109883883	452	TRUE	6:109882585-109884615			MICAL	NICAL	MICAL-1	FLJ11937	FLJ21739	DKFZp434B1517
FLJ34922	1.28289	0.0594765	0.144722	20.8858	3.678e-38	cg18108623	NM_152270.2	GeneID:91607	17	30725434	30724733	701	TRUE	17:30724564-30725868			SLFN8/9
CCK	1.27374	0.101698	0.245894	40.9314	3.678e-38	cg03724463	NM_000729.3	GeneID:885	3	42281528	42281399	129	TRUE	3:42281044-42282926			MGC117187
ADCY5	1.27141	0.0977475	0.23596	38.7168	3.678e-38	cg13384396	NM_183357.1	GeneID:111	3	124650367	124650082	285	TRUE	3:124648852-124651990
ATP8A2	1.27004	0.139	0.335225	61.0387	3.678e-38	cg18236477	NM_016529.3	GeneID:51761	13	24941066	24941115	49	TRUE	13:24940557-24941659			IB	ATP	ML-1	ATPIB	DKFZP434B1913
FRMPD4	1.26934	0.0608949	0.146788	20.9336	3.678e-38	cg17398312	NM_014728.1	GeneID:9758	X	12066961	12066506	455	TRUE	X:12065825-12067363			PDZD10	PDZK10	KIAA0316
HMFN0839	1.26702	0.107426	0.258536	43.1965	3.678e-38	cg10685945	NM_032717.3	GeneID:84803	4	84676846	84676677	169	TRUE	4:84675528-84677242			MGC11324
RPL31	1.26267	0.0625647	0.150117	21.3748	3.678e-38	cg19032144	NM_000993.2	GeneID:6160	2	100985583	100985183	400	TRUE	2:100984517-100985918			MGC88191
TCF7	1.26096	0.0756634	0.181331	27.2832	3.678e-38	cg01116966	NM_201633.1	GeneID:6932	5	133477916	133478301	385	TRUE	5:133477085-133479284			TCF-1	MGC47735
BRSK2	1.2487	0.0880083	0.209132	32.2582	3.678e-38	cg14021073	NM_003957.1	GeneID:9024	11	1366961	1367705	744	TRUE	11:1366566-1368933			SAD1	STK29	PEN11B	C11orf7
FRAG1	1.24807	0.0805308	0.19128	28.7246	3.678e-38	cg02940164	NM_014489.1	GeneID:27315	11	3786547	3786360	187	TRUE	11:3785869-3786630			PGAP2	MGC799
CCNA1	1.24563	0.126921	0.300957	51.246	3.678e-38	cg16422907	NM_003914.2	GeneID:8900	13	35904734	35904633	101	TRUE	13:35903373-35904811
HSPA2	1.24558	0.117702	0.279087	46.3991	3.678e-38	cg24642523	NT_026437.11	GeneID:3306	14	64079018			TRUE	14:64075878-64079365
ZNF512	1.23836	0.107392	0.253372	40.6999	3.678e-38	cg01464985	NM_032434.2	GeneID:84450	2	27659126	27659397	271	TRUE	2:27659123-27659757			KIAA1805	MGC111046
SCGN	1.23401	0.0461778	0.108619	13.1025	3.678e-38	cg06493994	NM_006998.3	GeneID:10590	6	25760581	25760408	173	TRUE	6:25760176-25760849			SEGN	SECRET	setagin	DJ501N12.8
SPATA18	1.22889	0.0554538	0.129976	16.8169	3.678e-38	cg09022993	NM_145263.1	GeneID:132671	4	52612632	52612350	282	TRUE	4:52612015-52613199			FLJ32906
PPP1R13L	1.22825	0.218674	0.512313	111.796	3.678e-38	cg03554552	NM_006663.2	GeneID:10848	19	50599986	50600129	143	TRUE	19:50599756-50600150			RAI	IASPP	NKIP1	iASPP gene
NELL2	1.22554	0.076201	0.17819	25.4896	3.678e-38	cg14904464	NM_006159.1	GeneID:4753	12	43556057	43556405	348	TRUE	12:43555514-43557285			NRP2
FLJ10847	1.22513	0.0590783	0.138111	18.2493	3.678e-38	cg15014549	NM_018242.2	GeneID:55244	17	19377595	19377759	164	TRUE	17:19377299-19379267			MATE1	MGC64822
DSC3	1.22505	0.0812028	0.189822	27.641	3.678e-38	cg11832722	NM_001941.2	GeneID:1825	18	26877058	26876687	371	TRUE	18:26874977-26877256			DSC	DSC1	DSC2	DSC4	CDHF3	HT-CP
C12orf34	1.22497	0.103298	0.241461	37.5892	3.678e-38	cg01335367	NM_032829.1	GeneID:84915	12	108656591	108656955	364	FALSE			cg01335367	FLJ14721
PRMT2	1.22439	0.053491	0.124985	15.8263	3.678e-38	cg06725035	NM_001535.2	GeneID:3275	21	46879640	46879955	315	TRUE	21:46879361-46880668			HRMT1L1	MGC111373
B4GALNT4	1.22416	0.0773018	0.180591	25.9044	3.678e-38	cg16004226	NM_178537.3	GeneID:338707	11	359875	359804	71	TRUE	11:358935-360376			FLJ25045	NGalNAc-T1	Beta4GalNAc-T4
COG2	1.21449	0.0548552	0.127296	16.0373	3.678e-38	cg17031727	NM_007357.1	GeneID:22796	1	228844498	228844881	383	TRUE	1:228844295-228845376			LDLC
MLNR	1.21107	0.143579	0.332398	55.9254	3.678e-38	cg07935568	NM_001507.1	GeneID:2862	13	48692127	48692475	348	TRUE	13:48691941-48693636			GPR38	MTLR1
FLJ23554	1.20844	0.0984901	0.227598	34.1127	3.678e-38	cg21795497	NM_024806.2	GeneID:79864	11	122258536	122258683	147	TRUE	11:122258441-122259357
RGS5	1.20489	0.12451	0.287021	45.6711	3.678e-38	cg24901474	NM_003617.2	GeneID:8490	1	161439664	161439496	168	FALSE			cg24901474	MST092	MST106	MST129	MSTP032	MSTP092	MSTP106	MSTP129
JMJD2B	1.20297	0.0505755	0.116432	13.8944	3.678e-38	cg12072803	NM_015015.1	GeneID:23030	19	4919558	4920132	574	TRUE	19:4919382-4921114			KIAA0876
SLC38A3	1.20203	0.0863245	0.198601	28.3867	3.678e-38	cg19914607	NM_006841.3	GeneID:10991	3	50217509	50217709	200	TRUE	3:50217473-50218698			G17	SN1
TFRC	1.19478	0.0800202	0.183174	25.3753	3.678e-38	cg22956956	NM_003234.1	GeneID:7037	3	197293752	197293338	414	TRUE	3:197292528-197293786			TFR	CD71	TFR1	TRFR
BBS4	1.19435	0.0613397	0.14037	17.9178	3.678e-38	cg25996835	NM_033028.2	GeneID:585	15	70765218	70765588	370	TRUE	15:70765132-70765969
SPOCK	1.19244	0.0527212	0.120488	14.3707	3.678e-38	cg12832649	NM_004598.2	GeneID:6695	5	136862762	136862894	132	TRUE	5:136861841-136863150			TIC1	SPOCK1	TESTICAN
CBS	1.18947	0.0647612	0.1477	19.0526	3.678e-38	cg09622447	NM_000071.1	GeneID:875	21	43369447	43369490	43	TRUE	21:43367042-43370279			HIP4
ZNF135	1.1888	0.120117	0.273823	42.0664	3.678e-38	cg16638540	NM_003436.2	GeneID:7694	19	63262280	63262424	144	TRUE	19:63262091-63264376			ZNF61	pHZ-17
RIBC2	1.18863	0.0526285	0.119959	14.222	3.678e-38	cg23503501	NM_015653.2	GeneID:26150	22	44188457	44188244	213	TRUE	22:44187526-44188777			C22orf11
ACCN4	1.18486	0.113972	0.259106	39.0264	3.678e-38	cg19210770	NM_018674.3	GeneID:55515	2	220087335	220087296	39	TRUE	2:220087160-220087532			ASIC4	BNAC4	MGC17248	MGC24860
HOXD10	1.18114	0.0796762	0.180671	24.4474	3.678e-38	cg21591742	NM_002148.2	GeneID:3236	2	176689244	176689746	502	TRUE	2:176688866-176689812			HOX4	HOX4D	HOX4E
ATRNL1	1.17863	0.0885289	0.200396	27.8352	3.678e-38	cg06055013	NM_207303.1	GeneID:26033	10	116843654	116843114	540	TRUE	10:116842092-116844180			ALP	FLJ45344	KIAA0534	bA338L11.1	bA454H24.1	RP11-537G20.1
EPB41	1.17656	0.108867	0.24608	36.1098	3.678e-38	cg11226328	NM_203343.1	GeneID:2035	1	29085954	29086215	261	TRUE	1:29085901-29086988			HE	EL1	4.1R
HEYL	1.17386	0.139732	0.315257	49.6046	3.678e-38	cg25462291	NM_014571.2	GeneID:26508	1	39877643	39877905	262	TRUE	1:39877450-39878424
MGC13125	1.1685	0.152834	0.343537	55.2722	3.678e-38	cg05862431	NM_032725.2	GeneID:84811	11	116149408	116148914	494	TRUE	11:116148339-116149455
PRAC	1.16305	0.158687	0.355347	57.5387	3.678e-38	cg12374721	NM_032391.2	GeneID:84366	17	44154639	44154881	242	TRUE	17:44154292-44154687			MGC32520
TACSTD1	1.16281	0.189731	0.424794	74.7569	3.678e-38	cg16076328	NM_002354.1	GeneID:4072	2	47450622	47449971	651	TRUE	2:47449542-47451715			EGP	KSA	M4S1	MK-1	CD326	EGP40	MIC18	TROP1	Ep-CAM	hEGP-2	CO17-1A	GA733-2
RHOU	1.16158	0.0677315	0.151517	18.9726	3.678e-38	cg11431126	NM_021205.4	GeneID:58480	1	226937332	226937492	160	TRUE	1:226937300-226939047			ARHU	WRCH1	hG28K	CDC42L1	FLJ10616	DJ646B12.2	fJ646B12.2
RAMP1	1.15786	0.154793	0.345383	54.9023	3.678e-38	cg27567335	NM_005855.2	GeneID:10267	2	238432813	238432926	113	TRUE	2:238432700-238433713
CLMN	1.15485	0.0627332	0.139683	16.7936	3.678e-38	cg27508821	NM_024734.2	GeneID:79789	14	94855795	94855955	160	TRUE	14:94855230-94856460			calmin	FLJ12383	KIAA1188
EPIM	1.15193	0.0538633	0.11969	13.4649	3.678e-38	cg07057831	NM_194356.1	GeneID:2054	12	129888995	129889764	769	TRUE	12:129888808-129890323			STX2A	STX2B	STX2C	MGC51014
MGC13040	1.15039	0.0786928	0.174677	22.5064	3.678e-38	cg20346726	NM_032930.1	GeneID:85016	11	101423613	101423409	204	TRUE	11:101423103-101423893
COL2A1	1.15026	0.158403	0.351583	55.6633	3.678e-38	cg19601035	NM_001844.3	GeneID:1280	12	46685407	46684528	879	FALSE			cg19601035	SEDC	COL11A3
GNG8	1.1454	0.136716	0.302425	45.0814	3.678e-38	cg03116238	NM_033258.1	GeneID:94235	19	51829788	51829779	9	TRUE	19:51829585-51830039
SFT2D3	1.14446	0.0725005	0.160272	19.9121	3.678e-38	cg01900048	NM_032740.3	GeneID:84826	2	128175202	128175067	135	TRUE	2:128175176-128176549			MGC5391
FLJ10099	1.14236	0.0758706	0.167478	21.0345	3.678e-38	cg14702264	NM_017994.3	GeneID:55069	7	66023264	66023669	405	TRUE	7:66023140-66024338
OPRM1	1.14198	0.0691835	0.152677	18.6384	3.678e-38	cg14262937	NM_000914.2	GeneID:4988	6	154402044	154402136	92	FALSE			cg14262937	MOR1	OPRM	KIAA0403
MAPK3	1.13904	0.146362	0.322338	48.6636	3.678e-38	cg08966293	NM_002746.1	GeneID:5595	16	30042359	30042039	320	TRUE	16:30041568-30042474			ERK1	PRKM3	P44ERK1	P44MAPK
HCN4	1.13787	0.171469	0.377328	60.6364	3.678e-38	cg02860342	NM_005477.1	GeneID:10021	15	71448537	71448230	307	TRUE	15:71446780-71449188
AIFL	1.13464	0.0562861	0.123584	13.7589	3.678e-38	cg07331806	NM_144704.1	GeneID:150209	22	19649894	19649434	460	TRUE	22:19649062-19649970			FLJ30473
ZMYND15	1.13402	0.0890045	0.195337	25.3142	3.678e-38	cg18056600	NM_032265.1	GeneID:84225	17	4588796	4590086	1290	TRUE	17:4588563-4590345			DKFZp434N127
RAP1GA1	1.1318	0.166447	0.364738	57.1704	3.678e-38	cg07138512	NM_002885.1	GeneID:5909	1	21868904	21868386	518	TRUE	1:21868044-21869076			RAP1GAP	KIAA0474	rap1GAPII
C1orf85	1.13171	0.07304	0.160044	19.516	3.678e-38	cg22377142	NM_144580.1	GeneID:112770	1	154531899	154532073	174	FALSE			cg22377142	NCU-G1	MGC31963	RP11-443G18.2
SYT9	1.12701	0.112302	0.245276	33.4711	3.678e-38	cg08185661	NM_175733.2	GeneID:143425	11	7230074	7229757	317	TRUE	11:7229230-7230968			FLJ45896
ACSL6	1.12667	0.0932207	0.203551	26.3847	3.678e-38	cg02257405	NM_015256.2	GeneID:23305	5	131374884	131375248	364	TRUE	5:131374645-131375803			ACS2	FACL6	LACS2	LACS5	KIAA0837
AER61	1.1243	0.125647	0.273906	38.4701	3.678e-38	cg21785536	NM_173654.1	GeneID:285203	3	69146018	69145464	554	TRUE	3:69144312-69146034			FLJ13078	MGC34132
RIPK4	1.12277	0.161365	0.351398	53.445	3.678e-38	cg11719297	NM_020639.2	GeneID:54101	21	42060152	42060318	166	TRUE	21:42059152-42060619			DIK	PKK	RIP4	ANKK2	ANKRD3
TFAP2C	1.12256	0.0657293	0.143114	16.5839	3.678e-38	cg02536286	NM_003222.3	GeneID:7022	20	54637765	54637765	0	TRUE	20:54636751-54640473			ERF1	TFAP2G	hAP-2g	AP2-GAMMA
FLJ13909	1.11831	0.0709445	0.154015	18.2108	3.678e-38	cg05832487	NM_025108.1	GeneID:80178	16	2449756	2450147	391	TRUE	16:2449620-2450620
FKBP7	1.11774	0.0730243	0.158468	18.9089	3.678e-38	cg03283842	NM_181342.1	GeneID:51661	2	179052049	179051568	481	TRUE	2:179051153-179052346			FKBP23	PPIase	MGC9420
KIF17	1.11748	0.174222	0.378006	58.9591	3.678e-38	cg18486150	NM_020816.1	GeneID:57576	1	20917461	20917097	364	TRUE	1:20916071-20917733			KIF3X	KIF17B	KIAA1405
C22orf16	1.11298	0.112997	0.244402	32.6872	3.678e-38	cg03290040	NM_213720.1	GeneID:400916	22	22440355	22440141	214	TRUE	22:22439507-22441179			N27C7-4	MGC70831
CXCL16	1.11239	0.0887874	0.191962	23.9708	3.678e-38	cg19478743	NM_022059.1	GeneID:58191	17	4589396	4589863	467	TRUE	17:4588563-4590345			SRPSOX	CXCLG16	SR-PSOX
TRAPPC6A	1.11199	0.139426	0.301361	42.7679	3.678e-38	cg02713563	NM_024108.1	GeneID:79090	19	50372788	50373325	537	TRUE	19:50372534-50375107			TRS33	HSPC289	MGC2650
EVC2	1.10597	0.122947	0.264636	35.8483	3.678e-38	cg15305511	NM_147127.2	GeneID:132884	4	5763577	5762176	1401	TRUE	4:5763371-5764499			LBN
SOSTDC1	1.10487	0.148037	0.318397	45.5364	3.678e-38	cg25533774	NM_015464.1	GeneID:25928	7	16471934	16471999	65	FALSE			cg25533774	USAG1	ECTODIN	DKFZp564D206
RAB11FIP4	1.104	0.0977502	0.210115	26.5612	3.678e-38	cg10149836	NM_032932.3	GeneID:84440	17	26743438	26742768	670	TRUE	17:26742064-26743565			FLJ00131	KIAA1821	MGC11316	RAB11-FIP4
FGFR4	1.10069	0.144516	0.309925	43.6472	3.678e-38	cg15442702	NM_002011.3	GeneID:2264	5	176446859	176446527	332	TRUE	5:176446178-176447232			TKF	JTK2	CD334	MGC20292
IRF6	1.09918	0.0902165	0.193273	23.7206	3.678e-38	cg10074409	NM_006147.2	GeneID:3664	1	208046000	208046102	102	TRUE	1:208045524-208046444			LPS	PIT	PPS	VWS	OFC6
ATP5D	1.09744	0.125397	0.268319	36.0313	3.678e-38	cg00067471	NM_001687.4	GeneID:513	19	1192377	1192749	372	TRUE	19:1192361-1194023
TNRC4	1.09332	0.198491	0.423507	67.3587	3.678e-38	cg26093148	NM_007185.3	GeneID:11189	1	149956699	149955914	785	TRUE	1:149956306-149956727			CAGH4	CELF3	ERDA4	BRUNOL1	MGC57297
FGF20	1.09118	0.112322	0.2393	30.7725	3.678e-38	cg24030449	NM_019851.1	GeneID:26281	8	16904042	16904045	3	TRUE	8:16903149-16904126
SOX17	1.09075	0.0819482	0.174538	20.5884	3.678e-38	cg02919422	NM_022454.2	GeneID:64321	8	55533097	55533048	49	TRUE	8:55532627-55535230			FLJ22252
MAL	1.08911	0.118149	0.251355	32.6872	3.678e-38	cg06668300	NM_022438.1	GeneID:4118	2	95055482	95055206	276	TRUE	2:95054441-95056349
PRKD1	1.08679	0.1763	0.374464	55.5165	3.678e-38	cg21794225	NM_002742.1	GeneID:5587	14	29467215	29466651	564	TRUE	14:29465783-29467306			PKD	PKCM	PRKCM	PKC-MU
TBC1D1	1.08303	0.075272	0.159463	18.0625	3.678e-38	cg25608041	NM_015173.2	GeneID:23216	4	37568229	37569115	886	TRUE	4:37567883-37569855			TBC	TBC1	KIAA1108
HOXD11	1.08182	0.0939056	0.198771	23.9254	3.678e-38	cg16632715	NM_021192.2	GeneID:3237	2	176680359	176680330	29	TRUE	2:176679513-176681344			HOX4	HOX4F
EXTL1	1.08017	0.0667612	0.141152	15.1924	3.678e-38	cg04629204	NM_004455.1	GeneID:2134	1	26220912	26220858	54	FALSE			cg04629204	EXTL
SCN5A	1.07857	0.255557	0.539722	100.048	3.678e-38	cg19740375	NM_000335.3	GeneID:6331	3	38665414	38666167	753	TRUE	3:38665243-38666710			HB1	HB2	HH1	IVF	LQT3	SSS1	CDCD2	CMD1E	CMPD2	Nav1.5
NMNAT2	1.07395	0.107187	0.22565	27.7926	3.678e-38	cg10202457	NM_015039.2	GeneID:23057	1	181654374	181654360	14	TRUE	1:181652477-181654409			PNAT2	PNAT-2	C1orf15	MGC2756	KIAA0479
PAX9	1.07005	0.109343	0.229567	28.2118	3.678e-38	cg00509670	NM_006194.1	GeneID:5083	14	36200064	36200656	592	TRUE	14:36199815-36200327
CBLN2	1.06927	0.0733907	0.154001	16.8326	3.678e-38	cg21902544	NM_182511.2	GeneID:147381	18	68362495	68362542	47	TRUE	18:68361186-68362908
MTDH	1.06589	0.0861267	0.180302	20.6391	3.678e-38	cg00265490	NM_178812.2	GeneID:92140	8	98725021	98725583	562	TRUE	8:98724896-98726598			3D3	AEG1	AEG-1	LYRIC
PTGDR	1.06442	0.232688	0.486627	81.0406	3.678e-38	cg24989962	NM_000953.2	GeneID:5729	14	51804036	51804181	145	TRUE	14:51803838-51805763			DP	AS1	MGC49004
C1orf187	1.06404	0.135988	0.284321	36.8558	3.678e-38	cg13796218	NM_198545.2	GeneID:374946	1	11673250	11674373	1123	TRUE	1:11673114-11675342			UNQ3119	AGPA3119	FLJ34999
C14orf24	1.0623	0.085461	0.178465	20.2466	3.678e-38	cg24733384	NM_173607.2	GeneID:283635	14	34586034	34585320	714	TRUE	14:34584846-34586137			FLJ38854	DKFZp686J1254
DMC1	1.0606	0.0735092	0.153325	16.5399	3.678e-38	cg20120491	NM_007068.2	GeneID:11144	22	37295880	37296135	255	TRUE	22:37295484-37296809			DMC1H	LIM15	HsLim15	dJ199H16.1
TUBA1	1.05892	0.0624069	0.130017	13.1254	3.678e-38	cg01693157	NM_006000.1	GeneID:7277	2	219826517	219826882	365	TRUE	2:219825757-219827741			FLJ30169	H2-ALPHA
YWHAH	1.0502	0.0675349	0.139853	14.3025	3.678e-38	cg22478328	NM_003405.3	GeneID:7533	22	30670140	30670479	339	TRUE	22:30669843-30671638			YWHA1
RGS7	1.04934	0.075287	0.155813	16.5872	3.678e-38	cg21303386	NM_002924.2	GeneID:6000	1	239586934	239587101	167	TRUE	1:239586193-239587613
BIN1	1.03955	0.107492	0.220959	25.6209	3.678e-38	cg25228746	NM_004305.2	GeneID:274	2	127581849	127581334	515	TRUE	2:127580072-127581866			AMPH2	AMPHL	SH3P9	MGC10367	DKFZp547F068
SH3GL2	1.03819	0.0816778	0.167738	17.9819	3.678e-38	cg17398595	NM_003026.1	GeneID:6456	9	17568725	17569194	469	TRUE	9:17568653-17569949			CNSA2	SH3P4	EEN-B1	SH3D2A	FLJ20276
RFC1	1.0349	0.0886771	0.181697	19.8184	3.678e-38	cg12062995	NM_002913.3	GeneID:5981	4	39044607	39044390	217	TRUE	4:39043842-39045080			A1	RFC	PO-GA	RECC1	MHCBFB	RFC140	MGC51786
USH1C	1.03474	0.0890867	0.182516	19.9229	3.678e-38	cg21289015	NM_005709.2	GeneID:10083	11	17522624	17522539	85	TRUE	11:17522276-17523297			PDZ73	AIE-75	DFNB18	PDZ-45	PDZ-73	NY-CO-37	NY-CO-38	ush1cpst	PDZ-73/NY-CO-38
ZNF235	1.03456	0.0678759	0.139043	13.8354	3.678e-38	cg27541515	NM_004234.3	GeneID:9310	19	49500636	49501010	374	TRUE	19:49500591-49501187			HZF6	ZFP93	ANF270	ZNF270
PNPLA5	1.03184	0.168852	0.345241	45.4089	3.678e-38	cg03118854	NM_138814.2	GeneID:150379	22	42619488	42619190	298	TRUE	22:42618620-42619563			GS2L	dJ388M5.4	4833426H19Rik
PPIL5	1.0309	0.0762333	0.155767	16.063	3.678e-38	cg13892015	NM_152329.3	GeneID:122769	14	49134806	49135165	359	TRUE	14:49134569-49136807			LRR-1	4-1BBLRR	MGC20689
REEP1	1.02994	0.0924239	0.188724	20.6529	3.678e-38	cg02870945	NM_022912.1	GeneID:65055	2	86418635	86418288	347	TRUE	2:86417394-86418655			C2orf23	FLJ13110
KCNK4	1.02786	0.296112	0.603773	116.689	3.678e-38	cg01352108	NM_016611.2	GeneID:50801	11	63815454	63815451	3	TRUE	11:63815450-63816817			TRAAK	DKFZP566E164
SCN4B	1.02772	0.109533	0.223317	25.4599	3.678e-38	cg17186803	NM_174934.1	GeneID:6330	11	117528248	117528747	499	FALSE			cg17186803
RHCG	1.02653	0.108528	0.221084	25.0868	3.678e-38	cg24653181	NM_016321.1	GeneID:51458	15	87840586	87840803	217	TRUE	15:87840274-87841084			RHGK	PDRC2	C15orf6
KIAA0020	1.02501	0.116012	0.23608	27.2152	3.678e-38	cg24471894	NM_014878.3	GeneID:9933	9	2828508	2828507	1	FALSE			cg24471894	XTP5	MGC8749	RP11-526D20.2
RAC2	1.01709	0.136818	0.276897	32.9898	3.678e-38	cg18265887	NM_002872.3	GeneID:5880	22	35970196	35970251	55	TRUE	22:35970109-35970351			Gx	EN-7	HSPC022
C1orf104	1.01679	0.13607	0.275325	32.7512	3.678e-38	cg10057065	NM_173639.1	GeneID:284618	1	153558851	153557959	892	TRUE	1:153558675-153562005			FLJ35976	RP11-21N7.3
GATA4	1.01414	0.100505	0.20299	22.0758	3.678e-38	cg21073927	NM_002052.2	GeneID:2626	8	11599564	11599162	402	TRUE	8:11598711-11600557			MGC126629
DTNB	1.01348	0.104963	0.211896	23.2865	3.678e-38	cg06980380	NM_183360.1	GeneID:1838	2	25750429	25750007	422	TRUE	2:25749037-25750685			MGC17163	MGC57126
CDKN2B	1.0043	0.151064	0.303031	36.3565	3.678e-38	cg10210238	NT_008413.17	GeneID:1030	9	21995995			TRUE	9:21995095-21996291			P15	MTS2	TP15	INK4B
PACSIN1	1.00409	0.132738	0.26623	30.6623	3.678e-38	cg23239444	NM_020804.2	GeneID:29993	6	34541298	34541883	585	TRUE	6:34541252-34542377			KIAA1379
PPP1CA	1.00084	0.176184	0.352573	44.4267	3.678e-38	cg13055001	NM_002708.3	GeneID:5499	11	66926389	66925952	437	TRUE	11:66925372-66926634			PP-1A	PPP1A	MGC1674	MGC15877
FOXE3	0.993386	0.0710948	0.141539	13.2087	3.678e-38	cg18815943	NM_012186.1	GeneID:2301	1	47654901	47654331	570	TRUE	1:47654351-47655785			ASMD	FKHL12	FREAC8
KCNA6	0.991252	0.0885718	0.176073	17.6811	3.678e-38	cg26162582	NM_002235.2	GeneID:3742	12	4788652	4788603	49	TRUE	12:4788356-4789953			HBK2	KV1.6
AGPAT6	0.989265	0.113888	0.226087	24.2253	3.678e-38	cg09915099	NM_178819.2	GeneID:137964	8	41554458	41554876	418	TRUE	8:41554322-41555399			LPAATZ	LPAAT-zeta	DKFZp586M1819
HSU79303	0.988481	0.173168	0.343582	41.9539	3.678e-38	cg12582959	NM_013301.1	GeneID:29903	19	60851011	60851213	202	TRUE	19:60850950-60851849			ZNF581
KRT7	0.987487	0.235286	0.466508	66.5809	3.678e-38	cg07007400	NM_005556.3	GeneID:3855	12	50913098	50913221	123	TRUE	12:50912973-50913926			K7	CK7	SCL	K2C7	MGC3625
SLC16A5	0.984761	0.2074	0.410442	53.9722	3.678e-38	cg09300114	NM_004695.2	GeneID:9121	17	70595924	70595650	274	TRUE	17:70595284-70595964			MCT5
FLJ12056	0.983648	0.103335	0.204342	21.1146	3.678e-38	cg18006568	NM_024933.2	GeneID:79998	2	71059399	71059083	316	TRUE	2:71058922-71060108
CCL26	0.983646	0.215534	0.426209	57.1704	3.678e-38	cg12943082	NM_006072.4	GeneID:10344	7	75257247	75257000	247	FALSE			cg12943082	IMAC	TSC-1	MIP-4a	SCYA26	MGC126714	MIP-4alpha
PCDHGB7	0.98164	0.109926	0.217071	22.7228	3.678e-38	cg14011639	NM_018927.2	GeneID:56099	5	140777418	140777466	48	TRUE	5:140777221-140777959			ME6	PCDH-GAMMA-B7
CRIP1	0.979456	0.120913	0.238406	25.4808	3.678e-38	cg04411625	NM_001311.3	GeneID:1396	14	105024507	105024594	87	TRUE	14:105023580-105025363			CRHP	CRIP	CRP1
C15orf27	0.979223	0.0985473	0.194276	19.6499	3.678e-38	cg27321979	NM_152335.1	GeneID:123591	15	74139587	74139354	233	TRUE	15:74138315-74139603			FLJ38190
GRB7	0.978559	0.212054	0.417851	54.9023	3.678e-38	cg17740645	NM_005310.2	GeneID:2886	17	35147939	35147713	226	FALSE			cg17740645
MAPK12	0.974602	0.157346	0.3092	35.5097	3.678e-38	cg21974239	NM_002969.3	GeneID:6300	22	49042605	49042216	389	TRUE	22:49041517-49042644			ERK3	ERK6	SAPK3	PRKM12	SAPK-3	P38GAMMA
IGF2	0.970755	0.137429	0.269343	29.3754	3.678e-38	cg20339650	NM_000612.2	GeneID:3481	11	2117458	2116578	880	TRUE	11:2115427-2119259			FLJ44734
ZNF530	0.970746	0.126401	0.247728	26.3515	3.678e-38	cg23854009	NM_020880.2	GeneID:348327	19	62802940	62803065	125	TRUE	19:62802892-62803688			KIAA1508
SLC30A2	0.970027	0.0960037	0.188059	18.5674	3.678e-38	cg05674944	NM_001004434.1	GeneID:7780	1	26244877	26245191	314	TRUE	1:26244727-26245945			ZNT2	ZnT-2	PP12488	FLJ36708	MGC11303
WHSC2	0.967524	0.143541	0.280691	30.7991	3.678e-38	cg14217157	NM_005663.2	GeneID:7469	4	1981675	1980547	1128	TRUE	4:1979437-1982166			NELFA	NELF-A	FLJ10442	FLJ25112	P/OKcl.15
KCND1	0.965799	0.0916671	0.179039	17.2492	3.678e-38	cg06526829	NM_004979.4	GeneID:3750	X	48713014	48713195	181	FALSE			cg06526829	KV4.1
KCNB2	0.953896	0.100946	0.195543	18.9538	3.678e-38	cg20890210	NM_004770.2	GeneID:9312	8	73612735	73612180	555	TRUE	8:73611127-73612795			KV2.2
ADCY4	0.950216	0.11873	0.229405	23.0395	3.678e-38	cg12265829	NM_139247.2	GeneID:196883	14	23873862	23873704	158	TRUE	14:23873382-23874334
IHH	0.94763	0.103209	0.199059	19.1405	3.678e-38	cg25908985	NM_002181.1	GeneID:3549	2	219633309	219633433	124	TRUE	2:219632914-219634448			BDA1	HHG2
SENP6	0.947269	0.105561	0.203544	19.6836	3.678e-38	cg08222514	NM_015571.1	GeneID:26054	6	76369098	76368961	137	TRUE	6:76367925-76369412			SSP1	SUSP1	FLJ11355	KIAA0389	KIAA0797
MAN1C1	0.946038	0.117692	0.226743	22.5435	3.678e-38	cg04631202	NM_020379.1	GeneID:57134	1	25815047	25816546	1499	TRUE	1:25814952-25817489			HMIC	MAN1C	MAN1A3	pp6318
CCL26	0.945575	0.204279	0.393432	47.2193	3.678e-38	cg05556717	NM_006072.4	GeneID:10344	7	75257240	75257000	240	FALSE			cg05556717	IMAC	TSC-1	MIP-4a	SCYA26	MGC126714	MIP-4alpha
MGC4562	0.944539	0.176409	0.339511	38.2135	3.678e-38	cg12623088	NM_133375.2	GeneID:115752	15	64372575	64372714	139	TRUE	15:64372523-64373654			FLJ38088
C3orf52	0.943031	0.0993527	0.191012	18.0019	3.678e-38	cg05570980	NM_024616.1	GeneID:79669	3	113287673	113287929	256	TRUE	3:113287406-113288434			TTMP	FLJ23186
GCH1	0.941031	0.0845266	0.162283	14.408	3.678e-38	cg01838317	NM_000161.2	GeneID:2643	14	54439611	54439292	319	TRUE	14:54438128-54439747			GCH	DYT5	GTPCH1	GTP-CH-1
NPTX2	0.939973	0.18917	0.36292	41.5771	3.678e-38	cg12799895	NM_002523.1	GeneID:4885	7	98084588	98084545	43	TRUE	7:98083575-98085970			NP2	NARP	NP-II
TP73	0.939139	0.111301	0.213407	20.6142	3.678e-38	cg16741710	NM_005427.1	GeneID:7161	1	3559246	3558989	257	TRUE	1:3556965-3559547			P73
ETV7	0.938638	0.117028	0.22431	21.9356	3.678e-38	cg04289385	NM_016135.2	GeneID:51513	6	36463803	36463445	358	TRUE	6:36462816-36464072			TEL2	TELB	TEL-2
TEKT1	0.936276	0.248213	0.474977	62.6931	3.678e-38	cg12685753	NM_053285.1	GeneID:83659	17	6676263	6675784	479	TRUE	17:6675613-6676326
PSD3	0.93261	0.230789	0.440512	54.9632	3.678e-38	cg24056567	NM_015310.2	GeneID:23362	8	18916189	18915476	713	TRUE	8:18915099-18916495			EFA6R	HCA67	DKFZp761K1423
MOSC1	0.932468	0.164259	0.313495	33.4571	3.678e-38	cg07185695	NM_022746.2	GeneID:64757	1	219026209	219026894	685	TRUE	1:219026119-219026425			FLJ22390	RP11-295M18.1
UBXD3	0.930431	0.0974245	0.185676	16.9034	3.678e-38	cg06911113	NM_152376.2	GeneID:127733	1	20385204	20385165	39	TRUE	1:20384918-20385413			FLJ25429
SLC10A4	0.930041	0.160692	0.306171	32.2818	3.678e-38	cg08209133	NM_152679.2	GeneID:201780	4	48180381	48180206	175	TRUE	4:48179835-48181422			MGC29802
TMEM80	0.929204	0.121533	0.231425	22.4386	3.678e-38	cg16614500	NM_174940.1	GeneID:283232	11	684704	685643	939	TRUE	11:684347-686446			FLJ38216
TACSTD1	0.924238	0.142463	0.270349	27.0949	3.678e-38	cg07059875	NM_002354.1	GeneID:4072	2	47449577	47449971	394	TRUE	2:47449542-47451715			EGP	KSA	M4S1	MK-1	CD326	EGP40	MIC18	TROP1	Ep-CAM	hEGP-2	CO17-1A	GA733-2
EFHA1	0.923523	0.151488	0.287334	29.3076	3.678e-38	cg08163803	NM_152726.1	GeneID:221154	13	21076600	21076309	291	TRUE	13:21075626-21076603			DCAMKL1	FLJ34588	1110008L20Rik
HCP5	0.923476	0.144011	0.273143	27.4	3.678e-38	cg13784557	NM_006674.2	GeneID:10866	6	31538895	31538938	43	TRUE	6:31538727-31539202			P5-1	D6S2650E
C10orf107	0.918063	0.0920292	0.173896	15.0994	3.678e-38	cg16063112	NM_173554.1	GeneID:219621	10	63093085	63092725	360	TRUE	10:63092414-63093183			MGC44593	bA63A2.1
KCNC3	0.91762	0.106727	0.201606	18.405	3.678e-38	cg06572160	NM_004977.2	GeneID:3748	19	55523713	55524446	733	TRUE	19:55522929-55526307			KV3.3	KSHIIID
TSLP	0.916812	0.232275	0.438522	52.978	3.678e-38	cg15089387	NM_033035.3	GeneID:85480	5	110434560	110435289	729	TRUE	5:110433764-110434674
OSTM1	0.916258	0.153279	0.289269	29.1611	3.678e-38	cg21769969	NM_014028.3	GeneID:28962	6	108503191	108502634	557	TRUE	6:108502055-108503715			GL	GIPN	HSPC019
MRPL12	0.914439	0.0971484	0.183109	16.0998	3.678e-38	cg17161537	NM_002949.2	GeneID:6182	17	77281338	77280812	526	TRUE	17:77279932-77281470			5c5-2	L12mt	MRPL7	RPML12	MGC8610	MRPL7/L12	MRP-L31/34
FKBP10	0.912706	0.161899	0.304787	31.0263	3.678e-38	cg21416237	NM_021939.2	GeneID:60681	17	37223617	37222727	890	FALSE			cg21416237	FKBP65	hFKBP65	FLJ22041
LOC201164	0.909741	0.155432	0.292011	29.1611	3.678e-38	cg02880176	NM_178836.2	GeneID:201164	17	17050542	17050357	185	TRUE	17:17049380-17050976
CXCL2	0.906612	0.0992938	0.18614	16.1951	3.678e-38	cg16890267	NM_002089.1	GeneID:2920	4	75183479	75183776	297	TRUE	4:75183138-75184257			GRO2	GROb	MIP2	MIP2A	SCYB2	MGSA-b	MIP-2a	CINC-2a	MGSA beta
NULP1	0.901249	0.10423	0.194668	16.9827	3.678e-38	cg01161216	NM_014972.1	GeneID:22980	16	88466949	88467527	578	TRUE	16:88466609-88468601			Hulp1	FKSG26	PRO2620	hKIAA1049
SNRPN	0.898824	0.263592	0.491479	62.1119	3.678e-38	cg22678136	NT_026446.13	GeneID:6638	15	22644614			TRUE	15:22644176-22644728			SMN	SM-D	RT-LI	HCERN3	SNRNP-N	SNURF-SNRPN
RAB15	0.897169	0.241653	0.450057	53.2578	3.678e-38	cg14944269	NM_198686.1	GeneID:376267	14	64509355	64508551	804	FALSE			cg14944269
HLX1	0.895656	0.22409	0.41691	46.976	3.678e-38	cg13170032	NM_021958.2	GeneID:3142	1	219118766	219119382	616	TRUE	1:219118429-219120558			HB24
ETV7	0.894541	0.110424	0.205281	17.9864	3.678e-38	cg05216141	NM_016135.2	GeneID:51513	6	36462938	36463445	507	TRUE	6:36462816-36464072			TEL2	TELB	TEL-2
PDE9A	0.894456	0.0930397	0.172952	14.3154	3.678e-38	cg00516481	NM_002606.2	GeneID:5152	21	42946271	42946931	660	TRUE	21:42946154-42947773			HSPDE9A2
GAS8	0.893511	0.178617	0.331816	33.5273	3.678e-38	cg15936718	NM_001481.1	GeneID:2622	16	88616302	88616509	207	TRUE	16:88616246-88616821			GAS11
KCNE3	0.893262	0.168019	0.312073	30.8286	3.678e-38	cg23189044	NM_005472.3	GeneID:10008	11	73855762	73856186	424	TRUE	11:73855641-73856427			HOKPP	MiRP2	MGC129924	DKFZp781H21101
HCFC1R1	0.892025	0.120656	0.223912	19.9824	3.678e-38	cg02062650	NM_001002017.1	GeneID:54985	16	3014538	3014288	250	TRUE	16:3013862-3014613			HPIP	FLJ20568	MGC70711	MGC99622
GABRA4	0.890424	0.126597	0.234675	21.1467	3.678e-38	cg16358826	NM_000809.2	GeneID:2557	4	46691021	46690337	684	TRUE	4:46690835-46691057
CD4	0.889619	0.0954558	0.17685	14.59	3.678e-38	cg22908581	NM_000616.2	GeneID:920	12	6769236	6769005	231	FALSE			cg22908581	CD4mut
ZNF274	0.889233	0.218399	0.404518	44.3486	3.678e-38	cg00647741	NM_016324.2	GeneID:10782	19	63385262	63386208	946	FALSE			cg00647741	ZF2	HFB101	DKFZp686K08243
NAGA	0.889057	0.0880139	0.162999	13.104	3.678e-38	cg27187881	NM_000262.1	GeneID:4668	22	40796291	40796719	428	TRUE	22:40796208-40797317			GALB	D22S674
BCL7B	0.886538	0.220812	0.408222	44.7083	3.678e-38	cg05386606	NM_001707.2	GeneID:9275	7	72610215	72609960	255	TRUE	7:72609207-72610295
C16orf48	0.886192	0.0940493	0.17383	14.1874	3.678e-38	cg06637893	NM_032140.1	GeneID:84080	16	66258461	66258129	332	TRUE	16:66257367-66258718			DKFZP434A1319
INHBE	0.885975	0.348643	0.644296	105.462	3.678e-38	cg20664201	NM_031479.3	GeneID:83729	12	56135537	56135363	174	FALSE			cg20664201	MGC4638
CGI-38	0.885024	0.238191	0.43989	50.1736	3.678e-38	cg18107072	NM_016140.2	GeneID:51673	16	65985312	65984922	390	TRUE	16:65984642-65986631
ELF5	0.884069	0.222828	0.411245	44.9959	3.678e-38	cg12728032	NM_001422.2	GeneID:2001	11	34491933	34491906	27	TRUE	11:34491755-34491993			ESE2
LRRC61	0.880734	0.137598	0.253362	22.8863	3.678e-38	cg21516287	NM_023942.1	GeneID:65999	7	149651788	149651538	250	TRUE	7:149650764-149651993			HSPC295	MGC3036	FLJ22216	FLJ31392
C1QR1	0.880451	0.128583	0.236715	20.9714	3.678e-38	cg21023001	NM_012072.2	GeneID:22918	20	23015088	23014977	111	TRUE	20:23014996-23015197			CD93	C1qRP	CDw93	MXRA4	C1qR(P)	dJ737E23.1
NMNAT3	0.877158	0.178098	0.327122	31.8552	3.678e-38	cg15878317	NM_178177.2	GeneID:349565	3	140879472	140879530	58	TRUE	3:140878839-140879756			PNAT3	PNAT-3
ACLY	0.877041	0.129	0.236923	20.8525	3.678e-38	cg25687894	NM_001096.2	GeneID:47	17	37329242	37328798	444	TRUE	17:37327760-37329373			ATPCL	CLATP
CCDC37	0.874802	0.138429	0.253846	22.6704	3.678e-38	cg00891278	NM_182628.1	GeneID:348807	3	127596474	127596472	2	TRUE	3:127595793-127596808			FLJ40083	MGC120558
F3	0.872416	0.106825	0.195567	16.1071	3.678e-38	cg01185754	NM_001993.2	GeneID:2152	1	94779317	94779903	586	TRUE	1:94778962-94780728			TF	TFA	CD142
B4GALT6	0.870843	0.101572	0.185748	14.9648	3.678e-38	cg02930996	NM_004775.2	GeneID:9331	18	27519840	27518626	1214	TRUE	18:27518086-27520052			B4Gal-T6	beta4Gal-T6
GPR75	0.870726	0.143598	0.26258	23.4871	3.678e-38	cg19664945	NM_006794.1	GeneID:10936	2	53940847	53940572	275	TRUE	2:53940114-53941112			GPR-chr2	WI-31133
CDH1	0.870268	0.110147	0.201349	16.6642	3.678e-38	cg24765079	NT_010498.15	GeneID:999	16	67329931			TRUE	16:67328348-67330000			UVO	CDHE	ECAD	LCAM	Arc-1	CD324
LOC389458	0.867817	0.114244	0.208483	17.3551	3.678e-38	cg01870826	NM_203393.1	GeneID:389458	7	5078401	5078258	143	TRUE	7:5078039-5078627			MGC:35170
PCDH8	0.867328	0.124079	0.226355	19.2759	3.678e-38	cg20366906	NM_032949.1	GeneID:5100	13	52320382	52320775	393	TRUE	13:52317356-52321012			PAPC	ARCADLIN
DRD2	0.862245	0.11955	0.217325	18.1078	3.678e-38	cg12758687	NM_016574.2	GeneID:1813	11	112851537	112851091	446	TRUE	11:112850124-112851649			D2R	D2DR
THSD3	0.861948	0.0986213	0.179243	14.0361	3.678e-38	cg07965823	NM_182509.2	GeneID:145501	14	77034465	77034912	447	TRUE	14:77034200-77035952			TAIL1	FLJ32147	MGC119416	DKFZp686E0215
RPL39L	0.85751	0.127864	0.231678	19.4483	3.678e-38	cg07693270	NM_052969.1	GeneID:116832	3	188339622	188339957	335	TRUE	3:188339213-188340495			RPL39L1
MYO1B	0.852935	0.244152	0.44098	47.1974	3.678e-38	cg15096140	NM_012223.2	GeneID:4430	2	191817976	191818375	399	TRUE	2:191817926-191819459			myr1
C20orf195	0.8525	0.115014	0.207673	16.7003	3.678e-38	cg06661994	NM_024059.2	GeneID:79025	20	61654807	61654817	10	FALSE			cg06661994	MGC5356
NADSYN1	0.845809	0.28534	0.512834	60.6364	3.678e-38	cg20728496	NM_018161.4	GeneID:55191	11	70841203	70841865	662	TRUE	11:70841005-70842753			FLJ10631
PKP2	0.844161	0.118334	0.212435	16.8772	3.678e-38	cg01851399	NM_004572.2	GeneID:5318	12	32941484	32940993	491	TRUE	12:32940472-32941602			ARVD9
GALNT12	0.843722	0.247454	0.4441	46.8516	3.678e-38	cg05593325	NM_024642.2	GeneID:79695	9	100609517	100609802	285	TRUE	9:100609494-100610687			FLJ21212	GalNAc-T10
CPXM2	0.842941	0.242464	0.434909	45.2234	3.678e-38	cg09619146	NM_198148.1	GeneID:119587	10	125641024	125641490	466	TRUE	10:125640686-125641562			UNQ676
ACSS1	0.841349	0.175185	0.313884	27.9192	3.678e-38	cg15988792	NM_032501.2	GeneID:84532	20	24987314	24987616	302	FALSE			cg15988792	ACAS2L	AceCS2L	MGC33843
RALBP1	0.839638	0.248782	0.445221	46.6497	3.678e-38	cg15982419	NM_006788.3	GeneID:10928	18	9464707	9465530	823	TRUE	18:9464394-9466093			RIP	RIP1	RLIP76
CRX	0.836585	0.156328	0.279174	23.6583	3.678e-38	cg19762747	NM_000554.2	GeneID:1406	19	53016901	53016976	75	FALSE			cg19762747	CRD	CORD2
ST6GALNAC2	0.834892	0.119855	0.213787	16.6896	3.678e-38	cg08666623	NM_006456.1	GeneID:10610	17	72094278	72093524	754	FALSE			cg08666623	STHM	SIAT7	SIAT7B	SIATL1	ST6GalNAII
HOXC10	0.834295	0.117138	0.208856	16.1619	3.678e-38	cg08900043	NM_017409.2	GeneID:3226	12	52665163	52665221	58	TRUE	12:52664872-52666801			HOX3I	MGC5259
UQCRB	0.833883	0.110487	0.19694	14.9104	3.678e-38	cg22313024	NM_006294.2	GeneID:7381	8	97317245	97316987	258	TRUE	8:97316672-97317247			QPC	QP-C	UQBC	UQBP	UQPC
CDC42EP3	0.829672	0.157661	0.280208	23.4277	3.678e-38	cg05469695	NM_006449.3	GeneID:10602	2	37753457	37752830	627	TRUE	2:37751521-37753482			UB1	CEP3	BORG2
COL11A1	0.82848	0.124507	0.221101	17.1949	3.678e-38	cg12884406	NM_001854.2	GeneID:1301	1	103346577	103346640	63	TRUE	1:103346095-103346585			STL2	COLL6	CO11A1
STK32C	0.827891	0.105444	0.187172	13.7993	3.678e-38	cg07284558	NM_173575.2	GeneID:282974	10	133972411	133971467	944	TRUE	10:133970400-133972595			PKE	YANK3	MGC23665	RP11-140A10.1
IRX2	0.827532	0.104412	0.185294	13.6123	3.678e-38	cg26504021	NM_033267.2	GeneID:153572	5	2805882	2804769	1113	TRUE	5:2801201-2806084
PCSK1	0.824658	0.20504	0.36315	33.0444	3.678e-38	cg09786257	NM_000439.3	GeneID:5122	5	95794451	95794708	257	TRUE	5:95794255-95794915			PC1	PC3	NEC1	SPC3
VWA2	0.824293	0.18253	0.3232	28.0029	3.678e-38	cg13084429	NM_198496.1	GeneID:340706	10	115989011	115989008	3	TRUE	10:115988849-115989771			AMACO	CCSP-2
SPINT1	0.82328	0.164722	0.291463	24.3073	3.678e-38	cg04868764	NM_181642.2	GeneID:6692	15	38924311	38923538	773	TRUE	15:38922947-38924700			HAI	HAI1	MANSC2
FHIT	0.822237	0.111958	0.197957	14.6195	3.678e-38	cg19574488	NM_002012.1	GeneID:2272	3	61211587	61212164	577	TRUE	3:61211519-61212421			FRA3B	AP3Aase
TNFRSF18	0.819323	0.336428	0.593653	76.9913	3.678e-38	cg14886269	NM_004195.2	GeneID:8784	1	1131790	1131952	162	TRUE	1:1131403-1132105			AITR	GITR	GITR-D
PRLHR	0.81929	0.201791	0.356067	31.7615	3.678e-38	cg15748507	NM_004248.1	GeneID:2834	10	120344617	120344746	129	TRUE	10:120343551-120346241			GR3	GPR10	PrRPR	MGC126539	MGC126541
XK	0.818017	0.180566	0.318335	27.0872	3.678e-38	cg08902818	NM_021083.2	GeneID:7504	X	37429724	37430052	328	TRUE	X:37429528-37430511			KX	X1k	XKR1
PRDM15	0.817709	0.229504	0.404525	38.2809	3.678e-38	cg21241823	NM_022115.2	GeneID:63977	21	42173093	42172660	433	TRUE	21:42171521-42173135			PFM15	ZNF298	C21orf83
CA5B	0.815873	0.254049	0.447219	44.7022	3.678e-38	cg25376316	NM_007220.2	GeneID:11238	X	15666635	15666346	289	TRUE	X:15665820-15666693			MGC39962
AATF	0.812729	0.115371	0.202653	14.7571	3.678e-38	cg11857445	NM_012138.3	GeneID:26574	17	32380018	32380288	270	TRUE	17:32379737-32381014			DED	CHE1	CHE-1
RALGDS	0.812379	0.209754	0.36835	32.871	3.678e-38	cg06974755	NM_006266.2	GeneID:5900	9	134986752	134986382	370	TRUE	9:134985740-134986902			RGF	RalGEF
TMEM9	0.8104	0.137687	0.241461	18.5411	3.678e-38	cg21431091	NM_016456.2	GeneID:252839	1	199390648	199390243	405	TRUE	1:199389815-199390754			TMEM9A
ZIC1	0.809255	0.238684	0.418248	39.6267	3.678e-38	cg14456683	NM_003412.3	GeneID:7545	3	148609700	148609871	171	TRUE	3:148609249-148612068			ZIC	ZNF201
PSMA7	0.80732	0.14324	0.250665	19.2853	3.678e-38	cg08833432	NM_002792.2	GeneID:5688	20	60153219	60151869	1350	FALSE			cg08833432	C6	HSPC	RC6-1	XAPC7	MGC3755
CDKN2A	0.801942	0.18594	0.324177	26.7697	3.678e-38	cg11653709	NT_008413.17	GeneID:1029	9	21958146			TRUE	9:21958106-21958899			ARF	MLM	p14	p16	p19	CMM2	INK4	MTS1	TP16	CDK4I	CDKN2	INK4a	p14ARF	p16INK4	p16INK4a
KCNS2	0.799447	0.172047	0.299437	23.8995	3.678e-38	cg05373457	NM_020697.2	GeneID:3788	8	99509124	99508426	698	TRUE	8:99507518-99509796			KV9.2
LOC126208	0.797366	0.170134	0.295679	23.4047	3.678e-38	cg06161930	NM_001002836.1	GeneID:126208	19	61325003	61324461	542	TRUE	19:61323502-61325010
GMPR	0.796429	0.164662	0.285985	22.376	3.678e-38	cg25457331	NM_006877.2	GeneID:2766	6	16346526	16346790	264	TRUE	6:16346040-16347637
C6orf118	0.795022	0.110628	0.191951	13.2112	3.678e-38	cg02064106	NM_144980.1	GeneID:168090	6	165642848	165643088	240	TRUE	6:165642419-165642983			MGC23884	bA85G2.1	dJ416F21.2
FBXO27	0.794237	0.196571	0.340886	28.1894	3.678e-38	cg02197293	NM_178820.3	GeneID:126433	19	44214998	44215038	40	TRUE	19:44214012-44215404			FBG5	Fbx27
NUDT8	0.792444	0.161278	0.279334	21.46	3.678e-38	cg13631259	NM_181843.1	GeneID:254552	11	67153421	67153977	556	TRUE	11:67152961-67155262			FLJ41567
PENK	0.791565	0.11654	0.201724	13.9828	3.678e-38	cg04598121	NM_006211.2	GeneID:5179	8	57521059	57521143	84	TRUE	8:57520521-57522710
LEP	0.791531	0.21111	0.365412	30.9626	3.678e-38	cg12782180	NM_000230.1	GeneID:3952	7	127668168	127668567	399	TRUE	7:127667928-127668724			OB	OBS
DAZAP1	0.791386	0.377059	0.65259	90.6651	3.678e-38	cg06341721	NM_018959.2	GeneID:26528	19	1357759	1358584	825	TRUE	19:1357198-1360039			MGC19907
WHSC1L1	0.787708	0.144231	0.24899	18.297	3.678e-38	cg25510610	NM_023034.1	GeneID:54904	8	38360051	38358947	1104	TRUE	8:38358099-38360064			NSD3	pp14328	FLJ20353
MST1R	0.783295	0.227792	0.392042	33.7261	3.678e-38	cg03332271	NM_002447.1	GeneID:4486	3	49916155	49916074	81	TRUE	3:49915736-49916551			RON	PTK8	CDw136
HOXA9	0.780973	0.171442	0.294587	22.4581	3.678e-38	cg01381846	NM_152739.2	GeneID:3205	7	27171310	27171674	364	TRUE	7:27170287-27173690	7:27170287-27173690	HSA-MIR-196B		HOX1	ABD-B	HOX1G	HOX1.7	MGC1934
ALDH1A3	0.780785	0.295598	0.507857	51.7199	3.678e-38	cg27652350	NT_035325.6	GeneID:220	15	99238512			TRUE	15:99236455-99238833			ALDH6	RALDH3	ALDH1A6
RNUT1	0.777215	0.191373	0.327979	25.7111	3.678e-38	cg20630655	NM_005701.2	GeneID:10073	15	73705755	73705132	623	FALSE			cg20630655	KPNBL
RAB11FIP4	0.777174	0.204587	0.350616	28.1973	3.678e-38	cg04764624	NM_032932.3	GeneID:84440	17	26742255	26742768	513	TRUE	17:26742064-26743565			FLJ00131	KIAA1821	MGC11316	RAB11-FIP4
MSX1	0.775453	0.262712	0.449691	41.2803	3.678e-38	cg20161179	NT_006051.17	GeneID:4487	4	4914183			TRUE	4:4913563-4914786			HOX7	HYD1	OFC5
SEPT10	0.773179	0.284527	0.486265	46.8973	3.678e-38	cg03552103	NM_178584.1	GeneID:151011	2	109730291	109729072	1219	TRUE	2:109728093-109730817			FLJ11619
CNTROB	0.773095	0.319823	0.546555	58.6062	3.678e-38	cg25011395	NM_053051.1	GeneID:116840	17	7775332	7776262	930	TRUE	17:7775260-7775583			LIP8	PP1221
RASSF5	0.772914	0.165799	0.283304	20.8962	3.678e-38	cg10167296	NM_031437.1	GeneID:83593	1	204747251	204747502	251	TRUE	1:204746730-204748150			RAPL	Maxp1	NORE1	RASSF3	MGC10823
SLC15A3	0.772716	0.224384	0.383356	31.8382	3.678e-38	cg21992250	NM_016582.1	GeneID:51296	11	60475285	60475833	548	TRUE	11:60474677-60476063			OCTP	PHT2	PTR3	hPTR3
NPAS4	0.768711	0.214367	0.365226	29.3604	3.678e-38	cg22134325	NM_178864.2	GeneID:266743	11	65945321	65945051	270	TRUE	11:65944577-65946304			NXF	Le-PAS	PASD10
C10orf10	0.766102	0.332886	0.566129	61.9479	3.678e-38	cg04444771	NM_007021.2	GeneID:11067	10	44793718	44794263	545	FALSE			cg04444771	FIG	DEPP
KIAA1838	0.765389	0.209394	0.355934	28.0226	3.678e-38	cg26200580	NM_032448.1	GeneID:84498	6	170457198	170457769	571	TRUE	6:170457028-170458319			KIAA0183	dJ894D12.1
TCF2	0.764635	0.249252	0.423464	36.436	3.678e-38	cg12788467	NM_000458.1	GeneID:6928	17	33179448	33179182	266	TRUE	17:33179383-33179763			HNF2	LFB3	HNF1B	MODY5	VHNF1	HNF1beta
FLJ46831	0.763748	0.21928	0.372314	29.8323	3.678e-38	cg13929328	NM_207426.1	GeneID:399823	10	129425888	129425942	54	TRUE	10:129424072-129426344			FOXI2
GCAT	0.762592	0.151023	0.256215	17.8854	3.678e-38	cg11368946	NM_014291.2	GeneID:23464	22	36534337	36533901	436	TRUE	22:36533345-36534339			KBL	MGC23053
CHRDL1	0.761106	0.128477	0.217742	14.3306	3.678e-38	cg12485020	NM_145234.2	GeneID:91851	X	109925925	109925649	276	TRUE	X:109925492-109926221			CHL	VOPT	NRLN1	dA141H5.1
GNAI2	0.759725	0.159946	0.270815	19.0746	3.678e-38	cg15972294	NM_002070.2	GeneID:2771	3	50248100	50248651	551	TRUE	3:50247648-50249014			GIP	GNAI2B	H_LUCA15.1	H_LUCA16.1
DYRK3	0.759438	0.269978	0.457028	40.8879	3.678e-38	cg09328024	NM_003582.2	GeneID:8444	1	204874797	204875504	707	TRUE	1:204874697-204876310			RED	REDK	DYRK5
BNIP2	0.756866	0.166047	0.280589	19.8404	3.678e-38	cg20468883	NM_004330.1	GeneID:663	15	57769688	57768778	910	FALSE			cg20468883	NIP2	BNIP-2
NIFIE14	0.755405	0.285395	0.481777	44.328	3.678e-38	cg00739120	NM_032635.2	GeneID:10430	19	40727715	40728385	670	TRUE	19:40727497-40728997			MGC1936
C11orf52	0.753372	0.303629	0.511836	49.2996	3.678e-38	cg05697249	NM_080659.1	GeneID:91894	11	111294903	111294847	56	FALSE			cg05697249	FLJ25219	MGC14839	MGC131888
ADAMTS18	0.751825	0.127523	0.214739	13.778	3.678e-38	cg20807545	NM_139054.2	GeneID:170692	16	76027039	76026512	527	TRUE	16:76025670-76027234			ADAMTS21
UBE2D4	0.750406	0.188689	0.317426	23.0434	3.678e-38	cg15262984	NM_015983.2	GeneID:51619	7	43932173	43932572	399	TRUE	7:43932157-43933072			HBUCE1
SOX14	0.749207	0.147645	0.248172	16.5634	3.678e-38	cg03811478	NM_004189.2	GeneID:8403	3	138966386	138966269	117	TRUE	3:138964433-138967163			SOX28	MGC119898	MGC119899	SRY-box 14
ZNF287	0.746475	0.240182	0.402952	32.2599	3.678e-38	cg03565323	NM_020653.1	GeneID:57336	17	16413591	16413189	402	TRUE	17:16412567-16413671
FLJ13639	0.741746	0.359913	0.601846	66.9199	3.678e-38	cg05600717	NM_024705.1	GeneID:79758	13	51276745	51276294	451	TRUE	13:51275477-51276869
WDR52	0.736762	0.264896	0.441432	36.4473	3.678e-38	cg15044041	NM_018338.2	GeneID:55779	3	114643003	114643030	27	TRUE	3:114642854-114643339			FLJ11142	DKFZp781C082
CDH15	0.73576	0.232387	0.386988	29.5187	3.678e-38	cg11386746	NM_004933.2	GeneID:1013	16	87764871	87765664	793	TRUE	16:87764778-87765944			CDH3	CDHM	MCAD	CDH14
ZBTB8	0.735583	0.163348	0.271986	18.0625	3.678e-38	cg11619390	NM_144621.2	GeneID:127557	1	32703766	32703245	521	TRUE	1:32702497-32703962			BOZF1	FLJ90065	MGC17919	DKFZp547H154
SLC13A5	0.733739	0.147	0.244452	15.5585	3.678e-38	cg16652063	NM_177550.2	GeneID:284111	17	6557377	6557388	11	TRUE	17:6556978-6558390			NACT	MGC138356	DKFZp686E17257
DDHD1	0.73367	0.200904	0.334076	23.7161	3.678e-38	cg18555117	NM_030637.1	GeneID:80821	14	52690151	52689750	401	FALSE			cg18555117
GPI	0.731633	0.202647	0.336499	23.8231	3.678e-38	cg26986236	NM_000175.2	GeneID:2821	19	39547555	39547909	354	TRUE	19:39547487-39548830			AMF	NLK	PGI	PHI	GNPI	SA-36
ICA1	0.726343	0.200897	0.332371	23.1263	3.678e-38	cg10798171	NM_022307.1	GeneID:3382	7	8268826	8268682	144	TRUE	7:8267385-8268892			ICA69	ICAp69
SOX2	0.725112	0.195903	0.323833	22.2606	3.678e-38	cg15105987	NM_003106.2	GeneID:6657	3	182913011	182912416	595	TRUE	3:182911974-182913948			ANOP3	MGC2413
FAM57B	0.722281	0.367741	0.606695	65.0422	3.678e-38	cg13271951	NM_031478.3	GeneID:83723	16	29949261	29949405	144	FALSE			cg13271951	FP1188	DKFZP434I2117
SLC2A14	0.720773	0.16347	0.26941	17.1506	3.678e-38	cg05521696	NM_153449.2	GeneID:144195	12	7916762	7916762	0	TRUE	12:7916455-7917428			GLUT14
ARMCX2	0.718775	0.192649	0.317059	21.238	3.678e-38	cg22343001	NM_177949.1	GeneID:9823	X	100801504	100801491	13	TRUE	X:100801100-100801653			ALEX2	MGC8742	KIAA0512	MGC13343
HOXA4	0.715737	0.268208	0.440484	34.4837	3.678e-38	cg24169822	NM_002141.2	GeneID:3201	7	27137519	27136924	595	TRUE	7:27136060-27137536			HOX1	HOX1D
PPM1M	0.709283	0.143438	0.23452	13.8105	3.678e-38	cg20276750	NM_144641.1	GeneID:132160	3	52254595	52255226	631	TRUE	3:52254412-52255338			PP2CE	PP2Ceta	FLJ32332	PP2C-eta
SURF4	0.708118	0.445632	0.728016	101.453	3.678e-38	cg22244122	NM_033161.2	GeneID:6836	9	135233519	135232791	728	TRUE	9:135232028-135233521			ERV29	FLJ22993	MGC102753
POU4F2	0.705734	0.144869	0.236278	13.811	3.678e-38	cg13262687	NM_004575.1	GeneID:5458	4	147779029	147779538	509	TRUE	4:147778503-147781596			BRN3B	BRN3.2	Brn-3b
TTC3	0.705658	0.144803	0.236157	13.8026	3.678e-38	cg21832243	NM_003316.3	GeneID:7267	21	37366093	37367441	1348	FALSE			cg21832243	DCRR1	RNF105	TPRDIII	DKFZp686M0150
PRLH	0.70117	0.280295	0.455711	35.1985	3.678e-38	cg11380128	NM_015893.1	GeneID:51052	2	238138539	238139956	1417	FALSE			cg11380128	PRH
ZNF238	0.700135	0.149884	0.24351	14.1566	3.678e-38	cg02497700	NM_006352.3	GeneID:10472	1	242279981	242281208	1227	TRUE	1:242277547-242280317			RP58	TAZ-1	ZBTB18	C2H2-171
ANKRD13C	0.69748	0.224554	0.364152	24.3906	5.29427e-22	cg19342782	NM_030816.2	GeneID:81573	1	70594394	70592993	1401	FALSE			cg19342782	dJ677H15.3	RP4-677H15.5	DKFZP566D1346
ARHGEF7	0.696431	0.14381	0.233042	13.2202	3.678e-38	cg16427670	NM_003899.2	GeneID:8874	13	110564903	110565783	880	TRUE	13:110564691-110566860			P50	P85	PAK3	PIXB	COOL1	P50BP	P85SPR	BETA-PIX	KIAA0142	KIAA0412	P85COOL1	Nbla10314	DKFZp761K1021
COL19A1	0.693812	0.219733	0.35543	23.3657	3.678e-38	cg06321883	NM_001858.4	GeneID:1310	6	70633262	70633169	93	TRUE	6:70633025-70633404			COL9A1L	D6S228E
CHFR	0.693803	0.458629	0.741852	103.926	3.678e-38	cg20535781	NT_024477.13	GeneID:55743	12	131975086			TRUE	12:131973620-131975130			RNF116	RNF196	FLJ10796
TACSTD2	0.689854	0.27607	0.445335	32.8362	8.18375e-27	cg27398499	NM_002353.1	GeneID:4070	1	58816461	58816033	428	FALSE			cg27398499	M1S1	EGP-1	GA733	TROP2	GA733-1
PGCP	0.689018	0.246017	0.396625	27.162	3.678e-38	cg11536940	NM_016134.2	GeneID:10404	8	97727252	97726675	577	TRUE	8:97726093-97727293
WNK2	0.687925	0.213672	0.344218	21.9666	3.678e-38	cg16158807	NM_006648.3	GeneID:65268	9	94986712	94987033	321	TRUE	9:94985882-94988045			PRKWNK2	KIAA1760	NY-CO-43	SDCCAG43	P/OKcl.13
ADPRHL1	0.685704	0.45444	0.730961	98.0859	3.678e-38	cg14845091	NM_199162.1	GeneID:113622	13	113155957	113155840	117	TRUE	13:113155952-113156321			ARH2
SOX21	0.68432	0.181971	0.292417	17.3463	3.678e-38	cg11208483	NM_007084.2	GeneID:11166	13	94162234	94162390	156	TRUE	13:94160973-94164117			SOX25
TMEM42	0.682303	0.383995	0.616196	61.2404	3.678e-38	cg16615211	NM_144638.1	GeneID:131616	3	44877937	44878412	475	TRUE	3:44877538-44879065			MGC29956
CCDC8	0.679498	0.464128	0.74334	101.254	3.678e-38	cg11715966	NM_032040.1	GeneID:83987	19	51609095	51608681	414	TRUE	19:51607022-51609496			DKFZP564K0322
MYBL2	0.679018	0.376182	0.602285	57.5501	3.678e-38	cg23843505	NM_002466.2	GeneID:4605	20	41728834	41729123	289	TRUE	20:41728220-41729819			BMYB	MGC15600
MINA	0.676257	0.348526	0.55694	48.0939	3.678e-38	cg04845628	NM_032778.3	GeneID:84864	3	99173380	99173621	241	TRUE	3:99173310-99174219			MDIG	NO52	MINA53	FLJ14393	DKFZp762O1912
RASSF1	0.675614	0.191346	0.305633	17.9871	3.678e-38	cg00777121	NM_007182.4	GeneID:11186	3	50353195	50353371	176	TRUE	3:50352707-50353696			123F2	RDA32	NORE2A	RASSF1A	REH3P21
IL15	0.675397	0.190778	0.30468	17.9178	3.678e-38	cg25546588	NM_000585.2	GeneID:3600	4	142776841	142777204	363	TRUE	4:142776728-142778075			IL-15	MGC9721
TNK1	0.675059	0.180756	0.288607	16.5889	3.678e-38	cg18632631	NM_003985.1	GeneID:8711	17	7224773	7225134	361	TRUE	17:7224715-7225512			MGC46193
NXPH3	0.674242	0.179627	0.286641	16.4143	3.678e-38	cg06405206	NM_007225.1	GeneID:11248	17	45007803	45008478	675	TRUE	17:45007709-45009511			NPH3
GALR1	0.673824	0.238138	0.379901	24.3556	3.678e-38	cg00662556	NT_025004.13	GeneID:2587	18	73092352			TRUE	18:73090255-73093032			GALNR	GALNR1
FLJ37587	0.67365	0.441797	0.704711	85.3697	3.678e-38	cg26292028	NM_173597.1	GeneID:283446	12	108363111	108362755	356	FALSE			cg26292028
SNX15	0.671805	0.214393	0.341543	20.7808	3.678e-38	cg03101664	NM_013306.3	GeneID:29907	11	64551186	64551486	300	TRUE	11:64551150-64552035			HSAF001435
HOXB8	0.670673	0.390521	0.621638	60.8027	3.678e-38	cg15539420	NM_024016.2	GeneID:3218	17	44047247	44047300	53	TRUE	17:44046403-44047788			HOX2	HOX2D	Hox-2.4
PGLYRP1	0.669683	0.392329	0.624088	61.1706	3.678e-38	cg02806777	NM_005091.1	GeneID:8993	19	51218157	51218163	6	TRUE	19:51217863-51218220			PGRP	TAG7	PGRPS	PGLYRP	PGRP-S	TNFSF3L	MGC126894	MGC126896
TMC4	0.667661	0.338387	0.537526	43.6921	3.678e-38	cg25736482	NM_144686.1	GeneID:147798	19	59369044	59368664	380	TRUE	19:59368866-59369172			MGC39329
CBFB	0.66636	0.192126	0.304916	17.4551	3.678e-38	cg06766367	NM_001755.2	GeneID:865	16	65620188	65620551	363	TRUE	16:65619963-65621646			PEBP2B
MLNR	0.665599	0.253301	0.401792	25.9606	3.678e-38	cg02620013	NM_001507.1	GeneID:2862	13	48692682	48692475	207	TRUE	13:48691941-48693636			GPR38	MTLR1
L3MBTL	0.664933	0.298879	0.473871	34.172	3.678e-38	cg02611863	NM_015478.4	GeneID:26013	20	41576510	41576488	22	TRUE	20:41576494-41576980			L3MBTL1	KIAA0681	H-L(3)MBT	dJ138B7.3	DKFZp586P1522
AHCY	0.66213	0.301838	0.477633	34.3975	3.678e-38	cg05674199	NM_000687.1	GeneID:191	20	32355089	32354784	305	TRUE	20:32354217-32355507			SAHH
PRRG4	0.659357	0.22603	0.356988	21.3554	3.678e-38	cg19005368	NM_024081.4	GeneID:79056	11	32808526	32808065	461	TRUE	11:32807618-32808661			TMG4
FLJ20232	0.658574	0.225282	0.355613	21.1859	3.678e-38	cg03972838	NM_019008.4	GeneID:54471	22	38227526	38228230	704	TRUE	22:38227522-38227753			HSU79252	dJ1104E15.3
AOC2	0.655928	0.268223	0.42262	27.393	3.678e-38	cg19317715	NM_001158.3	GeneID:314	17	38250104	38250135	31	FALSE			cg19317715	RAO	DAO2
SOX1	0.655429	0.206943	0.325953	18.5816	3.678e-38	cg22303211	NM_005986.2	GeneID:6656	13	111770172	111769914	258	TRUE	13:111768043-111771727
CYFIP1	0.654167	0.172293	0.271138	14.3021	3.678e-38	cg15032239	NM_014608.2	GeneID:23191	15	20443395	20444125	730	TRUE	15:20443233-20445536			SHYC	FLJ45151	P140SRA-1
TTC15	0.653239	0.416233	0.654608	65.9654	3.678e-38	cg12447832	NM_016030.5	GeneID:51112	2	3362264	3362453	189	TRUE	2:3362246-3363158			CGI-87	FLJ36862	DKFZp547E107
TBX4	0.645207	0.353611	0.553035	43.572	3.678e-38	cg18536148	NM_018488.2	GeneID:9496	17	56888626	56888589	37	TRUE	17:56888442-56889722			SPS
TACSTD2	0.644143	0.335961	0.525044	39.1305	3.678e-38	cg16080552	NM_002353.1	GeneID:4070	1	58815787	58816033	246	TRUE	1:58814224-58815985			M1S1	EGP-1	GA733	TROP2	GA733-1
NFYC	0.643875	0.180544	0.282104	14.611	3.678e-38	cg13735974	NM_014223.2	GeneID:4802	1	40929567	40929953	386	TRUE	1:40929558-40930682			HSM	CBFC	HAP5	CBF-C	NF-YC	H1TF2A	hCBF-C	DKFZp667G242
PSTPIP1	0.642198	0.225487	0.351919	19.8999	3.678e-38	cg26025891	NM_003978.2	GeneID:9051	15	75074954	75074609	345	FALSE			cg26025891	H-PIP	PAPAS	CD2BP1	PSTPIP	CD2BP1L	CD2BP1S
DCHS2	0.638108	0.216085	0.33629	18.447	3.678e-38	cg04517429	NM_199348.1	GeneID:54798	4	155633068	155632318	750	TRUE	4:155632296-155633257			CDHJ	CDH27	PCDHJ	PCDH23	FLJ20047
WDR41	0.634528	0.319727	0.496354	34.1282	3.678e-38	cg02017109	NM_018268.2	GeneID:55255	5	76824351	76824088	263	TRUE	5:76823331-76824380			MSTP048	FLJ10904
Bles03	0.633074	0.265305	0.411452	24.5186	3.678e-38	cg10467098	NM_031450.2	GeneID:83638	11	65444468	65443107	1361	FALSE			cg10467098	P5326
TMEM119	0.631965	0.275246	0.426542	25.9228	3.678e-38	cg16708012	NM_181724.1	GeneID:338773	12	107516243	107515913	330	FALSE			cg16708012
SLC4A3	0.631867	0.265125	0.410829	24.3676	3.678e-38	cg08274552	NM_201574.1	GeneID:6508	2	220200078	220200527	449	FALSE			cg08274552	AE3	SLC2C
EFCAB1	0.630014	0.21059	0.325906	17.1792	3.678e-38	cg11868900	NM_024593.2	GeneID:79645	8	49810588	49810344	244	TRUE	8:49810084-49811166			FLJ11767
FLJ10781	0.629168	0.478821	0.740579	88.7032	3.678e-38	cg06851207	NM_018215.2	GeneID:55228	19	51666978	51666617	361	TRUE	19:51666325-51667046
TUBB2B	0.629078	0.20882	0.322956	16.8865	3.678e-38	cg23517605	NM_178012.3	GeneID:347733	6	3173364	3172870	494	TRUE	6:3171849-3175236			MGC8685	bA506K6.1	DKFZp566F223	RP11-506K6.1	TUBB-PARALOG
SUOX	0.628412	0.304669	0.470977	30.4325	3.678e-38	cg06495347	NM_000456.2	GeneID:6821	12	54677718	54677310	408	FALSE			cg06495347
TUBGCP6	0.623415	0.254338	0.391812	22.1079	3.678e-38	cg11808757	NM_001008658.1	GeneID:85378	22	49026034	49025527	507	TRUE	22:49024879-49026203			GCP6
ABHD9	0.623017	0.271785	0.418573	24.4557	3.678e-38	cg05488632	NM_024794.1	GeneID:79852	19	15204174	15204231	57	TRUE	19:15203545-15205922			FLJ22408
TMEM109	0.621753	0.347031	0.533992	37.9321	3.678e-38	cg10735607	NM_024092.1	GeneID:79073	11	60437091	60438253	1162	TRUE	11:60436776-60437102			MGC5508
SLC22A18	0.621427	0.382784	0.588873	46.7262	3.678e-38	cg22858288	NT_009237.17	GeneID:5002	11	2886898			TRUE	11:2886834-2887801			HET	ITM	BWR1A	IMPT1	TSSC5	ORCTL2	BWSCR1A	SLC22A1L	p45-BWR1A	DKFZp667A184
LOC132321	0.620074	0.185601	0.285261	13.8017	3.678e-38	cg03916421	NM_173487.1	GeneID:132321	4	130232911	130234356	1445	FALSE			cg03916421
FAM50A	0.60801	0.264147	0.402601	21.991	3.678e-38	cg12219915	NM_004699.1	GeneID:9130	X	153325488	153325702	214	TRUE	X:153325293-153326263			9F	XAP5	HXC-26	DXS9928E
HTRA4	0.607054	0.305505	0.465328	27.8933	3.678e-38	cg12535715	NM_153692.2	GeneID:203100	8	38950850	38950854	4	TRUE	8:38950649-38951953			FLJ90724
PITX1	0.605843	0.454024	0.690965	67.3587	3.678e-38	cg24495017	NM_002653.3	GeneID:5307	5	134398429	134397887	542	TRUE	5:134396353-134398530			BFT	POTX	PTX1
CASP6	0.604329	0.260266	0.395675	21.1437	3.678e-38	cg17714799	NM_032992.2	GeneID:839	4	110844529	110844078	451	FALSE			cg17714799	MCH2
SAC	0.603123	0.32399	0.492142	30.5532	3.678e-38	cg08205865	NM_018417.2	GeneID:55811	1	166150003	166149964	39	FALSE			cg08205865	HCA2	RP1-313L4.2
PLEKHG5	0.602929	0.255736	0.388411	20.4765	3.678e-38	cg04818845	NM_020631.2	GeneID:57449	1	6502754	6502656	98	FALSE			cg04818845	KIAA0720	RP4-650H14.3
CENTD1	0.601855	0.221973	0.336882	16.4901	3.678e-38	cg15127324	NM_015230.2	GeneID:116984	4	35922837	35922374	463	TRUE	4:35921845-35922935			PARX	ARAP2	FLJ13675	KIAA0580
GPR75	0.599585	0.195156	0.295716	13.5791	3.678e-38	cg14832904	NM_006794.1	GeneID:10936	2	53940532	53940572	40	TRUE	2:53940114-53941112			GPR-chr2	WI-31133
SLC16A8	0.5968	0.315801	0.477604	28.3077	3.678e-38	cg20439022	NM_013356.1	GeneID:23539	22	36808733	36809095	362	TRUE	22:36808478-36808906			MCT3
LOC148137	0.595939	0.250373	0.378428	19.2225	3.678e-38	cg15660498	NM_144692.1	GeneID:148137	19	40941773	40940925	848	TRUE	19:40940302-40941942			DKFZp434C2231
RP11-450P7.3	0.594944	0.212951	0.321644	15.0088	3.678e-38	cg21655480	NM_153270.1	GeneID:257240	X	21586973	21586369	604	TRUE	X:21583682-21587167			MGC125650
ST6GAL1	0.594653	0.268491	0.405451	21.3067	3.678e-38	cg15928398	NM_173216.1	GeneID:6480	3	188130644	188131210	566	TRUE	3:188130446-188132671			CD75	SIAT1	ST6GalI	MGC48859	ST6Gal I
CMTM4	0.591594	0.334668	0.504314	30.8564	3.678e-38	cg18693704	NM_178818.2	GeneID:146223	16	65288814	65288111	703	TRUE	16:65287287-65288884			CKLFSF4
NTN2L	0.591248	0.314275	0.473471	27.3939	3.678e-38	cg22721827	NM_006181.1	GeneID:4917	16	2460959	2461501	542	FALSE			cg22721827
CUL7	0.590439	0.27776	0.418224	22.111	3.678e-38	cg18159180	NM_014780.3	GeneID:9820	6	43130191	43129632	559	TRUE	6:43130018-43130272			KIAA0076	dJ20C7.5
SSTR3	0.586992	0.324175	0.486947	28.4368	3.678e-38	cg14297029	NM_001051.2	GeneID:6753	22	35937622	35938299	677	TRUE	22:35937354-35937668
COX7A1	0.586623	0.269435	0.404617	20.7053	3.678e-38	cg24335895	NM_001864.2	GeneID:1346	19	41335611	41335611	0	TRUE	19:41335049-41335665			COX7A	COX7AH	COX7AM
LGP1	0.585633	0.328277	0.492645	28.9677	3.678e-38	cg08468689	NM_032484.3	GeneID:84514	17	37600206	37599739	467	FALSE			cg08468689	D11LGP1
ARTN	0.584591	0.201822	0.302656	13.332	3.678e-38	cg06207804	NM_003976.2	GeneID:9048	1	44171585	44171579	6	TRUE	1:44171543-44171935			EVN	NBN
TCERG1L	0.581563	0.230898	0.345532	15.9629	3.678e-38	cg10175795	NM_174937.1	GeneID:256536	10	132999184	132999976	792	TRUE	10:132999115-133001206
PCK1	0.57943	0.263062	0.393082	19.2999	3.678e-38	cg16101800	NM_002591.2	GeneID:5105	20	55569975	55569543	432	FALSE			cg16101800	PEPCK1	PEPCKC	MGC22652
ARF5	0.576236	0.227276	0.338859	15.1977	3.678e-38	cg15802323	NM_001662.2	GeneID:381	7	127015378	127015753	375	TRUE	7:127014895-127016535
FLJ11017	0.572095	0.471944	0.70163	63.8849	3.678e-38	cg04301614	NM_018302.1	GeneID:55286	4	37262388	37262250	138	FALSE			cg04301614
JPH4	0.571435	0.29842	0.443452	22.8989	3.678e-38	cg06536578	NM_032452.1	GeneID:84502	14	23118395	23117834	561	FALSE			cg06536578	JPHL1	hJP-4	KIAA1831
LOC158160	0.571368	0.330792	0.491534	27.5462	3.678e-38	cg03665457	NM_182829.1	GeneID:158160	10	38685382	38685312	70	TRUE	10:38684978-38685687			HSD17B7	FLJ40773	Hsd17b_2	MGC88684
NMBR	0.568346	0.323156	0.479183	25.9783	3.678e-38	cg08109815	NM_002511.1	GeneID:4829	6	142451524	142451629	105	TRUE	6:142450876-142451811
MID1IP1	0.567976	0.291233	0.431737	21.6365	3.678e-38	cg25812668	NM_021242.3	GeneID:58526	X	38547870	38548017	147	TRUE	X:38547756-38550317			MIG12	THRSPL	FLJ10386	G12-like	STRAIT11499
RP3-473B4.1	0.565784	0.219432	0.324802	13.8017	3.678e-38	cg01309671	NM_138819.1	GeneID:159091	X	133768891	133768890	1	TRUE	X:133768631-133769176
SLC1A2	0.564427	0.309034	0.456999	23.5763	3.678e-38	cg08258650	NM_004171.2	GeneID:6506	11	35398476	35397372	1104	TRUE	11:35396372-35398905			EAAT2	GLT-1
CCDC38	0.563078	0.319581	0.472155	24.8631	3.678e-38	cg25229172	NM_182496.1	GeneID:120935	12	94860252	94860559	307	TRUE	12:94860191-94861674			FLJ40089
PARVB	0.56113	0.216839	0.31993	13.2833	3.678e-38	cg18883209	NM_013327.3	GeneID:29780	22	42725934	42726506	572	FALSE			cg18883209	CGI-56
PKMYT1	0.560564	0.335278	0.494483	26.8784	3.678e-38	cg02510853	NM_182687.1	GeneID:9088	16	2971708	2970475	1233	TRUE	16:2969706-2971908			MYT1	DKFZp547K1610
LOC168850	0.558223	0.276143	0.406608	18.9835	3.678e-38	cg08137040	NM_176814.3	GeneID:168850	7	126820931	126820003	928	TRUE	7:126818736-126821420			MGC130032	MGC130033
NEFH	0.557349	0.242767	0.357247	15.3961	3.678e-38	cg02994956	NM_021076.2	GeneID:4744	22	28206534	28206219	315	TRUE	22:28205749-28207420			NFH
TGIF2	0.556798	0.227288	0.334341	13.9355	3.678e-38	cg12556134	NM_021809.4	GeneID:60436	20	34635024	34635437	413	TRUE	20:34634551-34637190
CEP63	0.55591	0.314494	0.462337	23.3768	3.678e-38	cg06541857	NM_025180.2	GeneID:80254	3	135686479	135687759	1280	FALSE			cg06541857	FLJ13386
CDK2	0.552839	0.284392	0.417194	19.402	3.678e-38	cg09106999	NM_001798.2	GeneID:1017	12	54646332	54646826	494	FALSE			cg09106999	p33(CDK2)
CENTB2	0.549727	0.361711	0.529476	29.6797	3.678e-38	cg14163776	NM_012287.3	GeneID:23527	3	196645869	196645041	828	FALSE			cg14163776	ACAP2	CNT-B2	KIAA0041
C20orf135	0.549451	0.487554	0.71355	62.8007	3.678e-38	cg09868035	NM_080622.2	GeneID:140701	20	61962518	61963010	492	FALSE			cg09868035	MGC42974	dJ591C20.1
TTC10	0.545823	0.371908	0.54293	30.8392	3.678e-38	cg18735146	NM_006531.2	GeneID:8100	13	20038606	20039208	602	TRUE	13:20038561-20039854			IFT88	TG737	hTg737	MGC26259	D13S1056E	RP11-172H24.2
DDOST	0.545463	0.425467	0.620965	42.0664	3.678e-38	cg08911391	NM_005216.3	GeneID:1650	1	20861177	20860531	646	FALSE			cg08911391	OST	WBP1	OST48	KIAA0115
PRLHR	0.543529	0.233192	0.339885	13.6171	3.678e-38	cg16196812	NM_004248.1	GeneID:2834	10	120345129	120344746	383	TRUE	10:120343551-120346241			GR3	GPR10	PrRPR	MGC126539	MGC126541
ANGPTL2	0.542534	0.314964	0.458753	22.0109	3.678e-38	cg09427311	NM_012098.2	GeneID:23452	9	128925551	128924865	686	FALSE			cg09427311	ARP2	HARP	MGC8889
C1orf65	0.542234	0.325225	0.4736	23.2955	3.678e-38	cg27202708	NM_152610.1	GeneID:164127	1	221633332	221633391	59	TRUE	1:221633187-221633859			FLJ35728	RP11-76K24.1
NTF3	0.541148	0.342694	0.498664	25.541	3.678e-38	cg04740359	NM_002527.3	GeneID:4908	12	5473803	5473527	276	TRUE	12:5473723-5474332			NT3	HDNF	NGF2	NGF-2	MGC129711
ALOX12	0.540324	0.361662	0.525965	28.3077	3.678e-38	cg03760483	NM_000697.1	GeneID:239	17	6840021	6840128	107	TRUE	17:6839463-6841283			LOG12
PAQR7	0.539308	0.401225	0.583091	35.4202	3.678e-38	cg23799313	NM_178422.4	GeneID:164091	1	26070947	26070331	616	FALSE			cg23799313	mSR	MPRA
PCDHGC4	0.537292	0.496266	0.720204	62.3014	3.678e-38	cg15361590	NM_018928.2	GeneID:56098	5	140844885	140844925	40	TRUE	5:140844389-140845813			MGC119489	PCDH-GAMMA-C4
MEOX1	0.53712	0.443547	0.643619	44.8915	3.678e-38	cg08471713	NM_013999.2	GeneID:4222	17	39094419	39094457	38	FALSE			cg08471713	MOX1
HOXA7	0.534436	0.488096	0.706946	58.326	3.678e-38	cg26511321	NM_006896.2	GeneID:3204	7	27163315	27162821	494	TRUE	7:27162023-27163571			ANTP	HOX1	HOX1A	HOX1.1
PLEK2	0.533904	0.541366	0.783812	82.7134	3.678e-38	cg17641252	NM_016445.1	GeneID:26499	14	66948288	66948581	293	TRUE	14:66948159-66949047
C16orf50	0.531848	0.239825	0.346735	13.425	3.678e-38	cg09212468	NM_032269.3	GeneID:84229	16	56286133	56286227	94	FALSE			cg09212468	DKFZp434I099
WNT16	0.529696	0.302628	0.436882	19.2958	7.68944e-38	cg24849648	NM_016087.2	GeneID:51384	7	120751255	120752657	1402	FALSE			cg24849648
TLOC1	0.527929	0.301234	0.434337	19.0083	3.678e-38	cg04561804	NM_003262.3	GeneID:7095	3	171166670	171167274	604	FALSE			cg04561804	HTP1	Dtrp1	SEC62	FLJ32803
PEX10	0.526511	0.428676	0.617483	38.9627	3.678e-38	cg20664247	NM_002617.3	GeneID:5192	1	2335335	2333870	1465	TRUE	1:2335193-2335428			NALD	RNF69	MGC1998
B3GNT4	0.525939	0.274737	0.395585	16.1135	3.678e-38	cg19535609	NM_030765.2	GeneID:79369	12	121253711	121254181	470	TRUE	12:121253265-121255264			B3GN-T4	beta3Gn-T4
CGI-69	0.525206	0.337347	0.485489	22.9462	3.678e-38	cg03192551	NM_016016.1	GeneID:51629	17	39758678	39757710	968	TRUE	17:39756526-39760418
BEX2	0.520559	0.312872	0.448819	19.5566	3.678e-38	cg24765005	NM_032621.2	GeneID:84707	X	102452264	102452601	337	TRUE	X:102451844-102452762			BEX1	DJ79P11.1
NF1	0.519955	0.308404	0.442224	19.0367	3.678e-38	cg22289810	NM_000267.1	GeneID:4763	17	26445733	26446243	510	TRUE	17:26445579-26446668			WSS	NFNS	VRNF	DKFZp686J1293
FOXD2	0.519625	0.399437	0.572626	31.6782	3.678e-38	cg15868302	NM_004474.2	GeneID:2306	1	47672914	47674276	1362	TRUE	1:47671572-47673093			FKHL17	FREAC9
CPNE7	0.517084	0.285104	0.408001	16.416	3.678e-38	cg16444968	NM_014427.3	GeneID:27132	16	88169224	88169677	453	TRUE	16:88168492-88170928			MGC34192
SETD6	0.5146	0.278557	0.397946	15.5481	3.678e-38	cg21335942	NM_024860.1	GeneID:79918	16	57107446	57106928	518	TRUE	16:57106362-57107773			FLJ21148
ABHD14A	0.513364	0.481019	0.686594	49.7594	3.678e-38	cg04474832	NM_015407.3	GeneID:25864	3	51983527	51984124	597	TRUE	3:51981943-51983747			DORZ1	DKFZP564O243
SYNPO	0.509859	0.336141	0.478635	21.1137	3.678e-38	cg12172720	NM_007286.3	GeneID:11346	5	149999796	150000433	637	FALSE			cg12172720	KIAA1029
MVP	0.506478	0.463878	0.658975	43.1518	3.678e-38	cg00334507	NM_017458.2	GeneID:9961	16	29732100	29731591	509	FALSE			cg00334507	LRP	VAULT1
C7orf26	0.505483	0.399085	0.56654	29.3703	3.678e-38	cg27508071	NM_024067.2	GeneID:79034	7	6595875	6596440	565	TRUE	7:6595793-6596947			MGC2718
SLC22A18	0.503872	0.262745	0.372576	13.4361	3.678e-38	cg19497444	NT_009237.17	GeneID:5002	11	2887370			TRUE	11:2886834-2887801			HET	ITM	BWR1A	IMPT1	TSSC5	ORCTL2	BWSCR1A	SLC22A1L	p45-BWR1A	DKFZp667A184
CACNG6	0.501564	0.27496	0.389275	14.2525	3.678e-38	cg04080057	NM_145814.1	GeneID:59285	19	59186995	59187354	359	TRUE	19:59186361-59187120
SLITRK4	0.500349	0.270071	0.38203	13.7849	3.678e-38	cg05801573	NM_173078.2	GeneID:139065	X	142550406	142550685	279	TRUE	X:142548903-142551607			DKFZp547M2010
MTNR1A	0.500028	0.283853	0.401436	14.866	3.678e-38	cg06039392	NM_005958.3	GeneID:4543	4	187713947	187713531	416	TRUE	4:187713092-187713983			MEL-1A-R
GUSB	0.49949	0.31853	0.45031	18.1672	3.678e-38	cg18219226	NM_000181.1	GeneID:2990	7	65085057	65084631	426	FALSE			cg18219226	MPS7
RELB	0.497862	0.525926	0.742671	60.8458	3.678e-38	cg02727285	NM_006509.2	GeneID:5971	19	50196082	50196552	470	TRUE	19:50195726-50197301			I-REL
SOCS4	0.495353	0.49799	0.701999	50.0734	3.678e-38	cg08292050	NM_080867.2	GeneID:122809	14	54562386	54563594	1208	FALSE			cg08292050	SOCS7	DKFZp686J1568
PCDHGB7	0.494838	0.357381	0.503609	21.991	3.678e-38	cg23563234	NM_018927.2	GeneID:56099	5	140777470	140777466	4	TRUE	5:140777221-140777959			ME6	PCDH-GAMMA-B7
RP13-360B22.2	0.494444	0.33134	0.466785	19.0153	3.678e-38	cg11839979	NM_032227.1	GeneID:84187	X	109133028	109132999	29	TRUE	X:109131973-109133498			FLJ20173	bB360B22.3
ZNF324	0.492921	0.509074	0.716415	52.8968	3.678e-38	cg27401095	NM_014347.1	GeneID:25799	19	63669716	63670275	559	TRUE	19:63669648-63671237			ZF5128
RHEB	0.49041	0.305354	0.428975	16.0482	3.678e-38	cg21134096	NM_005614.2	GeneID:6009	7	150848816	150847942	874	TRUE	7:150846139-150848922			RHEB2	MGC111559
TUBB4	0.489973	0.358323	0.503236	21.5444	3.678e-38	cg15677294	NM_006087.2	GeneID:10382	19	6453938	6453330	608	FALSE			cg15677294	TUBB5	beta-5
ASCC3L1	0.486557	0.339908	0.476245	19.1209	3.678e-38	cg13140267	NM_014014.2	GeneID:23020	2	96335431	96334988	443	TRUE	2:96334488-96335474			HELIC2	U5-200KD
GSTO2	0.485267	0.330811	0.463083	18.0568	3.678e-38	cg25250998	NM_183239.1	GeneID:119391	10	106018363	106018621	258	TRUE	10:106018342-106019194			bA127L20.1
TMOD4	0.484302	0.471938	0.660198	40.1249	3.678e-38	cg03718677	NM_013353.1	GeneID:29765	1	149414890	149415050	160	FALSE			cg03718677	Sk-Tmod	DKFZp779I0852
FLJ43752	0.48205	0.459635	0.641984	36.7411	3.678e-38	cg04329454	NM_207497.1	GeneID:401253	6	33669077	33669093	16	TRUE	6:33668263-33669321
RBM13	0.48194	0.596803	0.833508	90.4108	3.678e-38	cg23663332	NM_032509.2	GeneID:84549	8	33461496	33462259	763	TRUE	8:33461192-33462760
PCQAP	0.480692	0.587581	0.819918	83.9973	3.678e-38	cg26608332	NM_015889.3	GeneID:51586	22	19191476	19191886	410	TRUE	22:19191421-19192789			TIG1	CAG7A	CTG7A	MED15	TIG-1	TNRC7	ARC105	DKFZp686A2214	DKFZp762B1216
BCDIN3	0.480649	0.356249	0.4971	20.2676	3.678e-38	cg12584718	NM_019606.4	GeneID:56257	7	99866338	99865465	873	TRUE	7:99863663-99866414			FLJ20257
SH2D3A	0.480372	0.43874	0.612088	32.2043	3.678e-38	cg01036779	NM_005490.1	GeneID:10045	19	6719251	6718480	771	TRUE	19:6718910-6719312			NSP1
	0.47969	0.520128	0.72529	52.6498	3.678e-38	cg01000094		GeneID:144106	11	18239903	18240008	105	TRUE	11:18239883-18240212
CDKN2B	0.477492	0.457888	0.637528	35.4742	3.678e-38	cg18979223	NT_008413.17	GeneID:1030	9	21995769			TRUE	9:21995095-21996291			P15	MTS2	TP15	INK4B
LDHAL6A	0.474535	0.534633	0.742857	56.0506	3.678e-38	cg07915343	NM_144972.3	GeneID:160287	11	18434256	18434007	249	TRUE	11:18433429-18434456			MGC23940
PTHLH	0.473528	0.407456	0.565753	25.8982	3.678e-38	cg01333011	NM_002820.2	GeneID:5744	12	28015932	28016183	251	FALSE			cg01333011	HHM	PLP	PTHR	PTHRP	MGC14611
AMPD3	0.471132	0.387196	0.536731	22.8269	3.678e-38	cg24921089	NM_000480.2	GeneID:272	11	10429416	10428800	616	TRUE	11:10428264-10429468
MTNR1B	0.470475	0.294822	0.408495	13.5791	3.678e-38	cg15842276	NM_005959.3	GeneID:4544	11	92342296	92342437	141	TRUE	11:92342113-92343227			MEL-1B-R
ARL3	0.470151	0.306709	0.42487	14.4624	3.678e-38	cg18151487	NM_004311.2	GeneID:403	10	104465330	104464180	1150	FALSE			cg18151487	ARFL3
HCA112	0.467884	0.32073	0.443596	15.4597	3.678e-38	cg02244695	NM_018487.2	GeneID:55365	7	150128279	150128787	508	TRUE	7:150127662-150129289			GS188
MBTPS2	0.467507	0.353467	0.488746	18.6087	3.678e-38	cg27465531	NM_015884.1	GeneID:51360	X	21767633	21767675	42	TRUE	X:21767344-21768282			S2P
MAPK10	0.466535	0.438134	0.605408	29.6468	3.678e-38	cg17452384	NM_002753.2	GeneID:5602	4	87593261	87593307	46	FALSE			cg17452384	JNK3	JNK3A	PRKM10	p493F12	FLJ12099	MGC50974	p54bSAPK
CHRM1	0.465976	0.531631	0.734316	52.2984	3.678e-38	cg13530039	NM_000738.2	GeneID:1128	11	62446133	62445588	545	FALSE			cg13530039	M1	HM1	MGC30125
PRP2	0.462287	0.504653	0.695272	43.0553	3.678e-38	cg15518950	NM_173490.4	GeneID:134285	5	72451526	72452158	632	TRUE	5:72451195-72452621
FLJ43806	0.459346	0.480481	0.660622	36.4695	3.678e-38	cg17657618	NM_201628.1	GeneID:399563	1	15300241	15300684	443	TRUE	1:15300118-15300318			MGC126686	RP1-21O18.1
C6orf206	0.458296	0.315151	0.432991	14.222	3.678e-38	cg01344171	NM_152732.2	GeneID:221421	6	43720625	43720788	163	TRUE	6:43720593-43721485			FLJ30845	MRPS18AL1
DMP1	0.456784	0.313096	0.429717	13.9386	3.678e-38	cg22416721	NM_004407.1	GeneID:1758	4	88789598	88790483	885	FALSE			cg22416721
MAB21L2	0.456771	0.598598	0.821555	78.054	3.678e-38	cg20334738	NM_006439.3	GeneID:10586	4	151722389	151722753	364	FALSE			cg20334738	FLJ31103
PLCD1	0.456618	0.439082	0.602562	28.124	3.678e-38	cg24868271	NM_006225.1	GeneID:5333	3	38045464	38046121	657	TRUE	3:38045298-38046731
DGAT2L6	0.456518	0.346911	0.47604	16.8136	3.678e-38	cg17693270	NM_198512.1	GeneID:347516	X	69313921	69314061	140	FALSE			cg17693270	DC3	FLJ25989
AKAP12	0.456028	0.308813	0.423617	13.5609	3.678e-38	cg12061236	NM_005100.2	GeneID:9590	6	151602579	151603202	623	TRUE	6:151602349-151604472			AKAP250	DKFZp686M0430	DKFZp686O0331
MASP2	0.454329	0.319043	0.437135	14.2147	3.678e-38	cg18023080	NM_139208.1	GeneID:10747	1	11029971	11029872	99	FALSE			cg18023080	sMAP	MAP19	MASP-2
AMT	0.454149	0.474933	0.650646	34.2309	3.678e-38	cg20191453	NM_000481.2	GeneID:275	3	49434859	49435016	157	TRUE	3:49434750-49435011			GCE	NKH	GCST
SNCG	0.453821	0.331835	0.454502	15.1977	3.678e-38	cg21012874	NM_003087.1	GeneID:6623	10	88708373	88708395	22	TRUE	10:88708277-88708496			SR	BCSG1
MEST	0.453269	0.606785	0.830773	81.0875	3.678e-38	cg08077673	NM_177524.1	GeneID:4232	7	129913604	129913282	322	TRUE	7:129912883-129914215			PEG1	MGC8703	MGC111102	DKFZp686L18234
HAMP	0.452034	0.36539	0.499842	18.2029	3.678e-38	cg17907567	NM_021175.2	GeneID:57817	19	40465314	40465250	64	FALSE			cg17907567	HEPC	HFE2B	LEAP1	LEAP-1
CDH15	0.450061	0.31775	0.434077	13.7849	3.678e-38	cg00511475	NM_004933.2	GeneID:1013	16	87765831	87765664	167	TRUE	16:87764778-87765944			CDH3	CDHM	MCAD	CDH14
SSRP1	0.44788	0.39992	0.545504	21.46	3.678e-38	cg01511567	NM_003146.2	GeneID:6749	11	56860207	56859927	280	TRUE	11:56859304-56860378			FACT	T160
MRPL28	0.447022	0.446485	0.608658	27.7408	3.678e-38	cg12437481	NM_006428.3	GeneID:10573	16	360113	360541	428	TRUE	16:359840-360855			p15	MAAT1	MGC8499
GNRH2	0.446324	0.604475	0.823636	76.2022	3.678e-38	cg04267184	NM_178331.1	GeneID:2797	20	2971418	2972268	850	FALSE			cg04267184	GnRH-II	LH-RHII
ACRV1	0.445723	0.431996	0.588377	25.3427	3.678e-38	cg07153965	NM_020069.3	GeneID:56	11	125057297	125056152	1145	FALSE			cg07153965	SPACA2	D11S4365
CSPG4	0.444398	0.511825	0.696464	40.446	3.678e-38	cg21460582	NM_001897.3	GeneID:1464	15	73792916	73792151	765	FALSE			cg21460582	NG2	MCSP	MCSPG	MSK16	MEL-CSPG
WDR47	0.441707	0.360675	0.489872	16.6726	3.678e-38	cg19695867	NM_014969.3	GeneID:22911	1	109386913	109386258	655	TRUE	1:109386911-109387202			KIAA0893
EPHA1	0.439425	0.527772	0.715692	43.2625	3.678e-38	cg18997129	NM_005232.3	GeneID:2041	7	142815972	142816107	135	TRUE	7:142815700-142816331			EPH	EPHT	EPHT1
LTC4S	0.438605	0.383574	0.519856	18.6088	3.678e-38	cg16361890	NM_145867.1	GeneID:4056	5	179153151	179153592	441	FALSE			cg16361890	MGC33147
PRSS8	0.437128	0.32708	0.442835	13.461	3.678e-38	cg13439730	NM_002773.2	GeneID:5652	16	31054500	31054652	152	TRUE	16:31054357-31054558			CAP1	PROSTASIN
C18orf34	0.436461	0.344763	0.466561	14.7546	3.678e-38	cg18382305	NM_198995.1	GeneID:374864	18	29275063	29274683	380	TRUE	18:29274320-29275128			FLJ44050	MGC111498
SCML2	0.431096	0.394012	0.53123	18.8589	3.678e-38	cg26246138	NM_006089.1	GeneID:10389	X	18282533	18282699	166	TRUE	X:18281707-18283582
CGB2	0.429895	0.531936	0.71659	41.8173	3.678e-38	cg11177404	NM_033378.1	GeneID:114336	19	54226891	54226942	51	TRUE	19:54226438-54227222
C10orf93	0.428769	0.391684	0.52724	18.3445	3.678e-38	cg01757745	NM_173572.1	GeneID:255352	10	134605591	134606054	463	TRUE	10:134605528-134606974			bB137A17.3	RP13-137A17.3
MFSD7	0.425288	0.461534	0.619766	26.486	3.678e-38	cg24693053	NM_032219.2	GeneID:84179	4	672834	672973	139	TRUE	4:672640-673215			LP2561	FLJ22269
LIMD1	0.423717	0.472407	0.633676	27.9369	3.678e-38	cg04037228	NM_014240.1	GeneID:8994	3	45611390	45611355	35	FALSE			cg04037228
FBXO17	0.422941	0.543199	0.728244	42.9877	3.678e-38	cg24010336	NM_024907.5	GeneID:115290	19	44159098	44158220	878	TRUE	19:44159079-44159662			FBG4	Fbx17	FBXO26	MGC9379	FLJ11798	FLJ25205
BPHL	0.422283	0.467378	0.626308	26.9006	3.678e-38	cg14115346	NM_004332.1	GeneID:670	6	3063206	3064041	835	FALSE			cg14115346	MCNAA	Bph-rp	MGC41865	MGC125930
BSCL2	0.416908	0.44235	0.590564	22.5678	3.678e-38	cg07237830	NM_032667.4	GeneID:26580	11	62231301	62231395	94	FALSE			cg07237830	SPG17	GNG3LG	MGC4694
NHLH1	0.41421	0.531196	0.707855	37.622	3.678e-38	cg08247612	NM_005598.2	GeneID:4807	1	158603110	158603498	388	FALSE			cg08247612	HEN1	NSCL	NSCL1
AKAP10	0.411755	0.376143	0.500384	15.0648	3.678e-38	cg11630242	NM_007202.2	GeneID:11216	17	19822224	19821721	503	TRUE	17:19821177-19822421			PRKA10	D-AKAP2	MGC9414
PAQR4	0.411291	0.5278	0.701908	36.1165	3.678e-38	cg02626929	NM_152341.2	GeneID:124222	16	2951662	2951591	71	FALSE			cg02626929	FLJ30002
MGC52282	0.410713	0.614778	0.81725	64.5752	3.678e-38	cg10186456	NM_178453.2	GeneID:124221	16	2832913	2831850	1063	TRUE	16:2832415-2833267
PTCRA	0.410588	0.450601	0.598952	22.6994	3.678e-38	cg11898695	NM_138296.1	GeneID:171558	6	42991482	42991705	223	FALSE			cg11898695	PTA	PT-ALPHA
ZNF583	0.409632	0.621721	0.825862	67.4643	3.678e-38	cg12445208	NM_152478.1	GeneID:147949	19	61608017	61607530	487	TRUE	19:61606860-61608033			FLJ31030
PSME1	0.409204	0.413914	0.549658	18.3666	3.678e-38	cg25268718	NM_006263.2	GeneID:5720	14	23674551	23675218	667	FALSE			cg25268718	PA28A	IFI5111	MGC8628	REGalpha	PA28alpha
PGLYRP1	0.408796	0.465288	0.617706	24.3556	3.678e-38	cg10862535	NM_005091.1	GeneID:8993	19	51218323	51218163	160	TRUE	19:51218309-51218565			PGRP	TAG7	PGRPS	PGLYRP	PGRP-S	TNFSF3L	MGC126894	MGC126896
NME5	0.408543	0.432072	0.573509	20.198	3.678e-38	cg13707560	NM_003551.2	GeneID:8382	5	137502599	137503031	432	TRUE	5:137502546-137502930			NM23H5	NM23-H5
SOX15	0.408145	0.545211	0.723484	39.5507	3.678e-38	cg01029592	NM_006942.1	GeneID:6665	17	7434177	7434212	35	FALSE			cg01029592	SOX20	SOX26	SOX27
ECRG4	0.405423	0.465621	0.616705	23.8995	3.678e-38	cg10885338	NM_032411.1	GeneID:84417	2	106049072	106048545	527	TRUE	2:106048153-106049083
MDS032	0.404334	0.420134	0.556039	18.4275	3.678e-38	cg01252496	NM_018467.2	GeneID:55850	19	17187655	17187168	487	TRUE	19:17186672-17187660
NOL10	0.402397	0.527251	0.696868	33.8734	3.678e-38	cg02196655	NM_024894.1	GeneID:79954	2	10748215	10747549	666	TRUE	2:10746991-10748581			FLJ13938	FLJ14075
ACTC	0.401329	0.647379	0.85501	77.3441	3.678e-38	cg06048973	NM_005159.3	GeneID:70	15	32875399	32875153	246	FALSE			cg06048973	CMD1R
DPP4	0.399551	0.502566	0.662933	28.5355	3.678e-38	cg12335708	NM_001935.3	GeneID:1803	2	162639249	162639298	49	TRUE	2:162637886-162639319			CD26	ADABP	ADCP2	DPPIV	TP103
TMEM129	0.398084	0.517048	0.681344	30.8704	3.678e-38	cg21505886	NM_138385.2	GeneID:92305	4	1694226	1692882	1344	FALSE			cg21505886	D4S2561E
MEST	0.396256	0.577627	0.760208	45.0222	3.678e-38	cg07427065	NT_007933.14	GeneID:4232	7	129917832			TRUE	7:129917351-129920395			PEG1	MGC8703	MGC111102	DKFZp686L18234
FLJ14346	0.3948	0.413536	0.5437	16.6572	3.678e-38	cg09204187	NM_025029.2	GeneID:80097	2	130657138	130656173	965	FALSE			cg09204187	MGC87017
ZC3H7A	0.391648	0.631066	0.82789	63.7182	3.678e-38	cg14959707	NM_014153.2	GeneID:29066	16	11783892	11783909	17	TRUE	16:11783829-11784227			ZC3H7	HSPC055	ZC3HDC7	FLJ10027	FLJ20318
HRC	0.391518	0.532486	0.6985	32.5233	3.678e-38	cg10910525	NM_002152.2	GeneID:3270	19	54350044	54350493	449	FALSE			cg10910525
GPR137	0.388673	0.605604	0.79285	51.8082	3.678e-38	cg25400358	NM_020155.2	GeneID:56834	11	63810735	63809907	828	TRUE	11:63810728-63810935			C11orf4	GPR137A	TM7SF1L1
PCDHGC4	0.387671	0.560222	0.732927	37.7989	3.678e-38	cg12145907	NM_018928.2	GeneID:56098	5	140845018	140844925	93	TRUE	5:140844389-140845813			MGC119489	PCDH-GAMMA-C4
ALS2CR14	0.387131	0.453016	0.59245	19.7352	8.17059e-29	cg14367014	NM_178231.1	GeneID:65068	2	203443373	203444331	958	FALSE			cg14367014
TMOD3	0.385666	0.432496	0.56504	17.4244	3.678e-38	cg19686152	NM_014547.3	GeneID:29766	15	49908834	49909181	347	FALSE			cg19686152	UTMOD
KCNA3	0.382588	0.397022	0.517589	13.9828	3.678e-38	cg03483626	NM_002232.2	GeneID:3738	1	111019799	111019178	621	TRUE	1:111017242-111019922			MK3	HGK5	HLK3	PCN3	HPCN3	KV1.3	HUKIII	MGC41884
LDHD	0.382056	0.419858	0.547158	15.8101	3.678e-38	cg24429836	NM_153486.2	GeneID:197257	16	73708245	73708166	79	FALSE			cg24429836	MGC57726
BNC1	0.381449	0.399129	0.519925	14.0361	3.678e-38	cg27169020	NM_001717.2	GeneID:646	15	81745233	81744472	761	TRUE	15:81742719-81745331			BNC	BSN1	HsT19447
TCF12	0.381008	0.396528	0.51638	13.8017	3.678e-38	cg23131007	NM_003205.3	GeneID:6938	15	54997536	54998125	589	TRUE	15:54997353-54999553			HEB	HTF4	HsT17266
GAB1	0.380264	0.568875	0.740436	37.9437	3.678e-38	cg01601573	NM_207123.1	GeneID:2549	4	144476285	144477500	1215	TRUE	4:144475800-144478643
MRPL54	0.380099	0.398662	0.518831	13.8702	3.678e-38	cg00968931	NM_172251.1	GeneID:116541	19	3713178	3713672	494	FALSE			cg00968931
SRCRB4D	0.379854	0.66942	0.871056	78.5266	3.678e-38	cg13594711	NM_080744.1	GeneID:136853	7	75876721	75876948	227	FALSE			cg13594711	S4D-SRCRB	SRCRB-S4D
EYA4	0.37697	0.616777	0.800954	51.5372	3.678e-38	cg21296676	NM_004100.2	GeneID:2070	6	133603353	133604206	853	TRUE	6:133603260-133605886			CMD1J	DFNA10
NFATC2	0.37649	0.455387	0.591174	18.6214	3.678e-38	cg10226546	NM_173091.2	GeneID:4773	20	49592403	49592665	262	TRUE	20:49592243-49593041			NFAT1	NFATP	KIAA0611
AQP3	0.375916	0.64249	0.833736	61.7746	3.678e-38	cg26624914	NM_004925.3	GeneID:360	9	33438382	33437590	792	FALSE			cg26624914	GIL
OGDH	0.375713	0.464975	0.603296	19.5193	3.678e-38	cg07408740	NM_002541.2	GeneID:4967	7	44611831	44612696	865	TRUE	7:44611775-44612173			E1k	OGDC	AKGDH
RASGRP2	0.374495	0.417387	0.541094	14.7688	3.678e-38	cg14170423	NM_005825.2	GeneID:10235	11	64270385	64269504	881	TRUE	11:64269841-64270555			CDC25L	CALDAG-GEFI
HSPA2	0.370605	0.513111	0.663398	24.899	3.678e-38	cg27120999	NT_026437.11	GeneID:3306	14	64077803			TRUE	14:64075878-64079365
ARL14	0.370507	0.505711	0.653787	23.8013	3.678e-38	cg16334519	NM_025047.1	GeneID:80117	3	161878388	161877641	747	FALSE			cg16334519	ARF7	FLJ22595
VAMP8	0.368236	0.567477	0.732485	34.4433	3.678e-38	cg05656364	NM_003761.2	GeneID:8673	2	85658243	85658228	15	FALSE			cg05656364	EDB	VAMP5
CKMT2	0.367716	0.528454	0.681869	26.7668	3.678e-38	cg22979433	NM_001825.1	GeneID:1160	5	80564365	80564938	573	FALSE			cg22979433	SMTCK
LAMA3	0.362	0.420137	0.539963	13.771	3.678e-38	cg14894144	NM_000227.2	GeneID:3909	18	19524552	19523560	992	TRUE	18:19523109-19524860			E170	LOCS	LAMNA	lama3a
ANK3	0.361876	0.584609	0.751279	36.784	3.678e-38	cg12354377	NM_001149.2	GeneID:288	10	61819563	61819494	69	FALSE			cg12354377	ANKYRIN-G
HPN	0.36182	0.544935	0.700266	28.3709	3.678e-38	cg06151964	NM_182983.1	GeneID:3249	19	40223257	40223250	7	TRUE	19:40223056-40223277			TMPRSS1
ANKRD33	0.361053	0.513929	0.660071	23.3707	3.678e-38	cg19948393	NM_182608.2	GeneID:341405	12	50568077	50568011	66	TRUE	12:50567870-50568245			C12orf7	DKFZp686O1689
PLAGL1	0.360725	0.660482	0.848106	63.135	3.678e-38	cg17895149	NM_006718.2	GeneID:5325	6	144371522	144371246	276	TRUE	6:144370510-144371695			ZAC	LOT1	ZAC1	MGC126275	MGC126276	DKFZp781P1017
MMRN2	0.359548	0.600239	0.770121	40.2575	3.678e-38	cg19368582	NM_024756.1	GeneID:79812	10	88706626	88707352	726	FALSE			cg19368582	EMILIN3	FLJ13465	ENDOGLYX1	EndoGlyx-1
MYEF2	0.357782	0.591969	0.758582	37.486	3.678e-38	cg20603888	NM_016132.2	GeneID:50804	15	46258265	46257788	477	FALSE			cg20603888	MEF-2	MST156	MSTP156	FLJ11213	HsT18564	KIAA1341	MGC87325
C8orf38	0.357357	0.452557	0.579761	15.9343	3.678e-38	cg21197871	NM_152416.1	GeneID:137682	8	96105979	96106398	419	TRUE	8:96105896-96106919			MGC40214
TH	0.355558	0.604526	0.773479	40.2272	3.678e-38	cg05912121	NM_199292.1	GeneID:7054	11	2149610	2149611	1	FALSE			cg05912121	TYH
BNIP3	0.355412	0.518093	0.662822	22.9744	3.678e-38	cg21762589	NM_004052.2	GeneID:664	10	133646466	133645425	1041	TRUE	10:133644338-133646745			NIP3
UPB1	0.353867	0.471822	0.60298	17.3551	3.678e-38	cg10613381	NM_016327.2	GeneID:51733	22	23220330	23221251	921	TRUE	22:23220142-23221542			BUP1
MGC35048	0.35315	0.605569	0.773521	39.7837	3.678e-38	cg16616769	NM_153208.1	GeneID:124152	16	19634643	19635279	636	FALSE			cg16616769	FLJ36575
STMN1	0.352351	0.435687	0.556215	13.9639	3.678e-38	cg23323671	NM_005563.3	GeneID:3925	1	26106210	26105955	255	TRUE	1:26104408-26106291			Lag	SMN	OP18	PP17	PP19	PR22	LAP18
CBX7	0.343953	0.524733	0.666006	21.9536	3.678e-38	cg23124451	NM_175709.2	GeneID:23492	22	37878077	37878484	407	TRUE	22:37877791-37879728
SLD5	0.341814	0.542372	0.687375	23.9946	3.678e-38	cg24599942	NM_032336.1	GeneID:84296	8	41505502	41505903	401	TRUE	8:41505438-41506669			MGC14799
TRIP10	0.340502	0.692264	0.876543	69.3167	3.678e-38	cg02085507	NM_004240.2	GeneID:9322	19	6690192	6690707	515	TRUE	19:6690009-6691192			STP	CIP4	HSTP	STOT
SEC61A2	0.340012	0.648534	0.820893	48.8255	3.678e-38	cg18678121	NM_018144.2	GeneID:55176	10	12210813	12211704	891	TRUE	10:12210774-12212203			FLJ10578
SERPINB4	0.339772	0.559687	0.708316	26.3303	3.678e-38	cg24546942	NM_002974.1	GeneID:6318	18	59461606	59462470	864	FALSE			cg24546942	PI11	SCCA1	SCCA2	LEUPIN	SCCA-2
SMPD3	0.339637	0.673845	0.852709	59.3482	3.678e-38	cg17217677	NM_018667.2	GeneID:55512	16	67040695	67039905	790	TRUE	16:67039271-67040730	16:67038237-67039167	HS_254		NSMASE2	FLJ22593
VSIG2	0.339047	0.602129	0.761645	34.6636	3.678e-38	cg02082342	NM_014312.3	GeneID:23584	11	124127583	124127319	264	FALSE			cg02082342	CTH	CTXL	2210413P10Rik
TH	0.338103	0.679995	0.859577	61.4794	3.678e-38	cg08573687	NM_199292.1	GeneID:7054	11	2149617	2149611	6	FALSE			cg08573687	TYH
MYF5	0.337904	0.684551	0.865217	63.7182	3.678e-38	cg26207503	NM_005593.1	GeneID:4617	12	79634880	79634932	52	TRUE	12:79634686-79635423
KCNJ14	0.335678	0.465528	0.587483	14.5169	3.678e-38	cg10222534	NM_013348.2	GeneID:3770	19	53650706	53650578	128	FALSE			cg10222534	IRK4	KIR2.4	MGC46111
MGC15875	0.335279	0.49974	0.630483	17.7049	3.678e-38	cg18042806	NM_032921.1	GeneID:85007	5	177592577	177592397	180	TRUE	5:177591693-177592655			MGC45484	MGC117348
PDE4A	0.33512	0.553922	0.698763	24.4528	3.678e-38	cg08859675	NM_006202.1	GeneID:5141	19	10424771	10424637	134	FALSE			cg08859675	PDE4	DPDE2
VTN	0.334574	0.631349	0.796134	41.1863	3.678e-38	cg04706338	NM_000638.2	GeneID:7448	17	23721179	23721844	665	FALSE			cg04706338	V75	VNT
CGREF1	0.333052	0.588755	0.74164	30.1745	3.678e-38	cg06112415	NM_006569.2	GeneID:10669	2	27195662	27195475	187	TRUE	2:27195000-27195770			CGR11
ZNF239	0.332266	0.650362	0.818798	46.4152	3.678e-38	cg04825431	NM_005674.1	GeneID:8187	10	43383905	43383913	8	FALSE			cg04825431	MOK2	HOK-2
ELF1	0.329105	0.479096	0.601857	14.8854	5.65849e-22	cg11793332	NM_172373.2	GeneID:1997	13	40454827	40454418	409	FALSE			cg11793332
GATA2	0.328902	0.550271	0.691171	22.7866	3.678e-38	cg06490988	NM_032638.3	GeneID:2624	3	129694691	129694718	27	TRUE	3:129693171-129695283			NFE1B	MGC2306
TLE6	0.327485	0.618479	0.776083	35.3982	3.678e-38	cg08794763	NM_024760.1	GeneID:79816	19	2928843	2928562	281	FALSE			cg08794763	GRG6	FLJ14009	MGC14966
C1QL1	0.326891	0.631784	0.792451	38.7382	3.678e-38	cg16772514	NM_006688.3	GeneID:10882	17	40402398	40401170	1228	TRUE	17:40402280-40402551			CRF	C1QRF
NUCB1	0.326732	0.470463	0.59004	13.9352	3.678e-38	cg21252483	NM_006184.3	GeneID:4924	19	54091600	54091637	37	TRUE	19:54091451-54091731			NUC
FYCO1	0.32663	0.541257	0.67878	21.158	3.678e-38	cg24919972	NM_024513.1	GeneID:79443	3	46012612	46012304	308	TRUE	3:46011871-46012674			RUFY3	ZFYVE7	FLJ13335
SUSD2	0.325207	0.538607	0.674791	20.6142	3.678e-38	cg23349242	NM_019601.3	GeneID:56241	22	22907448	22907444	4	FALSE			cg23349242	BK65A6.2	FLJ22778
GTL3	0.323968	0.622597	0.779348	35.3982	3.678e-38	cg25771195	NM_013242.2	GeneID:29105	16	56721315	56720797	518	TRUE	16:56720072-56721737
TSC1	0.323888	0.576463	0.721559	25.8248	3.678e-38	cg19393006	NM_000368.3	GeneID:7248	9	134810588	134809841	747	FALSE			cg19393006	LAM	TSC	KIAA0243	MGC86987
PRSS21	0.323542	0.479916	0.600566	14.3154	3.678e-38	cg22730830	NM_144956.1	GeneID:10942	16	2807435	2807165	270	TRUE	16:2807115-2808150			ESP-1	TEST1
EGF	0.322066	0.589242	0.736623	27.6468	3.678e-38	cg13379236	NM_001963.2	GeneID:1950	4	111053257	111053499	242	FALSE			cg13379236	URG
ADAM30	0.320184	0.672435	0.839528	49.7112	3.678e-38	cg23131777	NM_021794.2	GeneID:11085	1	120240448	120240636	188	TRUE	1:120240390-120240877			svph4
EML1	0.319869	0.470443	0.587216	13.1886	3.678e-38	cg02727423	NM_004434.2	GeneID:2009	14	99328726	99329498	772	TRUE	14:99328718-99330143			EMAP	ELP79	EMAPL	HuEMAP	FLJ45033
BSCL2	0.319577	0.58593	0.73122	26.4838	3.678e-38	cg20342105	NM_032667.4	GeneID:26580	11	62231486	62231395	91	FALSE			cg20342105	SPG17	GNG3LG	MGC4694
DIO2	0.319016	0.548234	0.68391	20.7791	3.678e-38	cg00217795	NM_000793.3	GeneID:1734	14	79747441	79748278	837	TRUE	14:79747335-79747567			D2	SelY	TXDI2
TMEM88	0.318055	0.579897	0.722928	25.1347	3.678e-38	cg23671708	NM_203411.1	GeneID:92162	17	7699016	7699109	93	TRUE	17:7698629-7699147			FLJ20025	MGC71744
SEMA3B	0.317357	0.695978	0.86722	58.7721	3.678e-38	cg24019851	NT_022517.17	GeneID:7869	3	50289295			TRUE	3:50287560-50290055			SemA	SEMA5	SEMAA	semaV	LUCA-1	FLJ34863
PTGES	0.316442	0.494573	0.615869	14.6799	3.678e-38	cg26672426	NM_004878.3	GeneID:9536	9	131554403	131555165	762	TRUE	9:131554315-131554653			PGES	PIG12	PP102	PP1294	MGST-IV	MGST1L1	TP53I12	MGC10317	MGST1-L1
TCF15	0.314625	0.617374	0.767821	31.4498	3.678e-38	cg06143901	NM_004609.3	GeneID:6939	20	539400	538910	490	TRUE	20:538102-539417			EC2	PARAXIS
CDKN2B	0.311381	0.593585	0.736577	25.9783	3.678e-38	cg19481686	NT_008413.17	GeneID:1030	9	21995288			TRUE	9:21995095-21996291			P15	MTS2	TP15	INK4B
VPS37B	0.309389	0.709057	0.878651	61.1654	3.678e-38	cg24664957	NM_024667.1	GeneID:79720	12	121946956	121946665	291	TRUE	12:121945921-121947044			FLJ12750
ALAS1	0.309244	0.593658	0.735577	25.5312	3.678e-38	cg03929796	NM_199166.1	GeneID:211	3	52206880	52207156	276	TRUE	3:52206843-52207774			ALAS	MIG4	ALAS3	ALASH
SURF5	0.309176	0.59881	0.741926	26.4012	3.678e-38	cg01605984	NM_181491.1	GeneID:6837	9	135205975	135204793	1182	FALSE			cg01605984	MED22	MED24	MGC48682
MIOX	0.307216	0.650033	0.804298	37.3757	3.678e-38	cg24867501	NM_017584.5	GeneID:55586	22	49272203	49272079	124	FALSE			cg24867501	ALDRL6	MGC90217
LRFN3	0.307052	0.546297	0.675866	18.5865	3.678e-38	cg15060813	NM_024509.1	GeneID:79414	19	41120148	41119862	286	FALSE			cg15060813	MGC2656
TNFRSF4	0.306789	0.683073	0.844928	48.0796	3.678e-38	cg22335801	NM_003327.2	GeneID:7293	1	1138954	1139375	421	TRUE	1:1138837-1139104			OX40	ACT35	CD134	TXGP1L
C11orf47	0.306297	0.676653	0.836702	45.4407	3.678e-38	cg18103150	NM_173589.2	GeneID:283294	11	6475483	6475107	376	TRUE	11:6475045-6475550			FLJ35709
SLC35E4	0.303651	0.551513	0.680712	18.6334	3.678e-38	cg26233253	NM_001001479.1	GeneID:339665	22	29362613	29362313	300	FALSE			cg26233253
NAG8	0.299057	0.67017	0.824536	40.5146	3.678e-38	cg27263448	NM_014411.2	GeneID:27099	7	127425107	127424798	309	FALSE			cg27263448	NSG-X
RHOD	0.297398	0.597299	0.734036	23.597	3.678e-38	cg12473775	NM_014578.2	GeneID:29984	11	66581226	66580897	329	TRUE	11:66580635-66581321			Rho	ARHD	RHOM	RHOHP1
CAPN12	0.297168	0.631416	0.77584	29.7798	3.678e-38	cg15698196	NM_144691.3	GeneID:147968	19	43928194	43926954	1240	FALSE			cg15698196	MGC20576
NOXA1	0.296679	0.671667	0.825018	40.1217	3.678e-38	cg04837071	NM_006647.1	GeneID:10811	9	139438470	139437668	802	TRUE	9:139436592-139438641			p51NOX	FLJ25475	NY-CO-31	SDCCAG31
RASL12	0.296162	0.506915	0.622428	13.2939	3.678e-38	cg03349935	NM_016563.2	GeneID:51285	15	63148388	63147441	947	FALSE			cg03349935	RIS
MGC40222	0.295637	0.519056	0.637104	14.2126	3.678e-38	cg02110963	NM_152738.1	GeneID:221718	6	10542961	10542760	201	FALSE			cg02110963
ABI3	0.295128	0.625178	0.76709	27.9369	3.678e-38	cg25839227	NM_016428.2	GeneID:51225	17	44643501	44642588	913	FALSE			cg25839227	NESH	SSH3BP3
KRT8	0.293124	0.653547	0.800785	33.71	3.678e-38	cg20324165	NM_002273.2	GeneID:3856	12	51585412	51585127	285	FALSE			cg20324165	K8	KO	CK8	CYK8	K2C8	CARD2
STRN4	0.292506	0.65124	0.797616	32.9817	3.678e-38	cg14799446	NM_013403.1	GeneID:29888	19	51942447	51941527	920	FALSE			cg14799446	ZIN	zinedin
KCNQ1	0.291893	0.515488	0.631084	13.461	3.678e-38	cg12578166	NM_181797.1	GeneID:3784	11	2423485	2422797	688	TRUE	11:2421914-2423515			LQT	RWS	WRS	LQT1	ATFB1	KCNA8	KCNA9	Kv1.9	Kv7.1	KVLQT1
C14orf48	0.288475	0.614035	0.749951	24.3314	3.678e-38	cg24520070	NM_152777.2	GeneID:256369	14	93532090	93533395	1305	TRUE	14:93531980-93532194			MGC33356	c14_5713
C1orf35	0.28601	0.624158	0.761012	25.5102	3.678e-38	cg14925024	NM_024319.2	GeneID:79169	1	226358328	226357645	683	TRUE	1:226356160-226358366			MMTAG2	MGC4174
C16orf30	0.285919	0.61898	0.754652	24.5732	3.678e-38	cg17706173	NM_024600.1	GeneID:79652	16	1522582	1523659	1077	FALSE			cg17706173	CLP24	FLJ20898
VWCE	0.285568	0.626824	0.76403	25.9044	3.678e-38	cg11072113	NM_152718.1	GeneID:220001	11	60819700	60819122	578	TRUE	11:60818116-60819776			URG11	FLJ32009
ZNF541	0.285264	0.558614	0.680746	16.5054	3.678e-38	cg04391540	NM_032255.1	GeneID:84215	19	52739941	52739966	25	TRUE	19:52739817-52741134			MGC119518	MGC119519	MGC119521	DKFZp434I1930
C9orf66	0.284393	0.533755	0.650059	14.0134	3.678e-38	cg08909157	NM_152569.1	GeneID:157983	9	205561	205741	180	TRUE	9:203685-205584			FLJ31158	RP11-59O6.1
SLC5A11	0.283287	0.695522	0.846425	42.6999	3.678e-38	cg23280807	NM_052944.2	GeneID:115584	16	24765080	24765053	27	FALSE			cg23280807	KST1	RKST1	SGLT6	SMIT2
DIRAS3	0.282709	0.677151	0.823739	36.6442	3.678e-38	cg02317907	NT_032977.8	GeneID:9077	1	68288376			TRUE	1:68288302-68289231			ARHI	NOEY2
PARP12	0.281971	0.722072	0.877935	52.8488	3.678e-38	cg07937272	NM_022750.2	GeneID:64761	7	139409708	139409990	282	TRUE	7:139408342-139409766			ZC3H1	PARP-12	ZC3HDC1	FLJ22693
IL32	0.281491	0.661165	0.803613	32.0183	3.678e-38	cg18350391	NM_001012631.1	GeneID:9235	16	3055553	3055314	239	FALSE			cg18350391	NK4	TAIF	TAIFa	TAIFb	TAIFc	TAIFd	IL-32beta	IL-32alpha	IL-32delta	IL-32gamma
CLEC14A	0.28136	0.601481	0.731004	20.9688	3.678e-38	cg14473145	NM_175060.1	GeneID:161198	14	37795407	37795325	82	TRUE	14:37793841-37795561			CEG1	C14orf27
RLN2	0.279319	0.542963	0.658952	14.1378	3.678e-38	cg02875297	NM_134441.1	GeneID:6019	9	5294611	5294580	31	TRUE	9:5293703-5294659			H2	RLXH2	bA12D24.1.1	bA12D24.1.2
SMPD3	0.274882	0.582933	0.705288	17.4647	3.678e-38	cg00891541	NM_018667.2	GeneID:55512	16	67038988	67039905	917	TRUE	16:67038237-67039167	16:67039271-67040730	HS_254		NSMASE2	FLJ22593
ALX4	0.274366	0.539143	0.652073	13.1814	3.678e-38	cg23058901	NT_009237.17	GeneID:60529	11	44281335			TRUE	11:44281312-44281846			FPP	PFM	PFM1	PFM2	KIAA1788
CLEC14A	0.272441	0.629519	0.760364	23.2998	3.678e-38	cg18403361	NM_175060.1	GeneID:161198	14	37795501	37795325	176	TRUE	14:37793841-37795561			CEG1	C14orf27
MAP3K14	0.269177	0.579606	0.698495	16.1491	3.678e-38	cg19601328	NM_003954.1	GeneID:9020	17	40724512	40724125	387	FALSE			cg19601328	HS	NIK	HSNIK	FTDCR1B
TP53I11	0.268694	0.640681	0.771839	24.2727	3.678e-38	cg10313633	NM_006034.2	GeneID:9537	11	44929466	44929010	456	TRUE	11:44927577-44929557			PIG11
SMPD3	0.267541	0.564975	0.680091	14.4331	3.678e-38	cg10556064	NM_018667.2	GeneID:55512	16	67038990	67039905	915	TRUE	16:67038237-67039167	16:67039271-67040730	HS_254		NSMASE2	FLJ22593
CENTA2	0.266797	0.586627	0.705791	16.5312	3.678e-38	cg22485810	NM_018404.1	GeneID:55803	17	26272851	26273059	208	TRUE	17:26272783-26274166			cent-b	HSA272195
PKN1	0.266332	0.695397	0.836386	36.0994	3.678e-38	cg19103609	NM_002741.3	GeneID:5585	19	14404524	14405166	642	TRUE	19:14403590-14405780			DBK	PKN	PAK1	PRK1	PRKCL1	MGC46204
FLJ21125	0.265353	0.667049	0.801747	28.503	3.678e-38	cg26646411	NM_024627.4	GeneID:79680	22	18221374	18222339	965	FALSE			cg26646411
ADRA2B	0.264516	0.62001	0.744776	20.1827	3.678e-38	cg20634573	NM_000682.4	GeneID:151	2	96145134	96145615	481	TRUE	2:96144986-96147016			ADRA2L1	ADRARL1	ADRA2RL1	ALPHA2BAR
SPTBN2	0.264509	0.655659	0.787595	25.9606	3.678e-38	cg04985144	NM_006946.1	GeneID:6712	11	66245214	66245446	232	FALSE			cg04985144	SCA5
GTF3C5	0.260084	0.664642	0.795941	26.5442	3.678e-38	cg09095562	NM_012087.1	GeneID:9328	9	134894911	134895934	1023	TRUE	9:134894849-134896808			TFIIIC63	TFiiiC2-63	TFIIICepsilon
KIAA0240	0.258079	0.632725	0.756667	20.6594	3.678e-38	cg15679095	NM_015349.1	GeneID:23506	6	42897031	42896772	259	FALSE			cg15679095	DKFZp686P0250
COX6A2	0.251582	0.616055	0.733421	17.1996	3.678e-38	cg13726463	NM_005205.2	GeneID:1339	16	31347182	31347222	40	TRUE	16:31346216-31347186			COX6AH	COXVIAH
TNNT2	0.251338	0.596314	0.709799	14.9717	3.678e-38	cg18330203	NM_000364.2	GeneID:7139	1	199613270	199613428	158	FALSE			cg18330203	CMH2	TnTC	cTnT	CMD1D	MGC3889
WISP2	0.25122	0.694175	0.826216	30.4792	3.678e-38	cg00240880	NM_003881.2	GeneID:8839	20	42776647	42777299	652	FALSE			cg00240880	CCN5	CT58	CTGF-L
FLJ20273	0.250426	0.613901	0.730271	16.7299	3.678e-38	cg15967525	NM_019027.1	GeneID:54502	4	40212695	40212725	30	FALSE			cg15967525
NR0B2	0.248879	0.628226	0.74651	18.2071	3.678e-38	cg06650260	NM_021969.1	GeneID:8431	1	27113065	27113047	18	FALSE			cg06650260	SHP	SHP1
C4orf8	0.248662	0.604303	0.717976	15.3619	3.678e-38	cg20163033	NM_003704.3	GeneID:8603	4	2596992	2596957	35	FALSE			cg20163033	RES4-22
ABCC13	0.246721	0.606757	0.719922	15.2954	3.678e-38	cg11429658	NM_138726.2	GeneID:150000	21	14568506	14567991	515	TRUE	21:14568050-14568536			PRED6	C21orf73
P4HA3	0.246348	0.645527	0.765724	19.9945	3.678e-38	cg25599211	NM_182904.3	GeneID:283208	11	73700698	73700347	351	TRUE	11:73699933-73700730			C-P4H alpha III
SLC35B3	0.245533	0.612145	0.725716	15.6702	3.678e-38	cg09548084	NM_015948.2	GeneID:51000	6	8381217	8380624	593	TRUE	6:8380156-8381258			CGI-19	C6orf196
BATF	0.244489	0.59105	0.700201	13.4787	3.678e-38	cg09937039	NM_006399.2	GeneID:10538	14	75058956	75058537	419	FALSE			cg09937039	B-ATF	BATF1	SFA-2
C14orf49	0.242255	0.674183	0.797451	23.6335	3.678e-38	cg16522484	NM_152592.2	GeneID:161176	14	95011802	95011926	124	FALSE			cg16522484	FLJ25605	c14_5734	nesprin-3
LIMD2	0.242237	0.737189	0.871965	39.976	3.678e-38	cg02988947	NM_030576.2	GeneID:80774	17	59132545	59131217	1328	TRUE	17:59130514-59132651			MGC10986
ETNK2	0.241869	0.658889	0.779152	20.9965	3.678e-38	cg01566404	NM_018208.1	GeneID:55224	1	202388548	202387645	903	FALSE			cg01566404	EKI2	FLJ10761	HMFT1716	RP11-74C13.2
PYGO1	0.241141	0.677313	0.800534	23.8995	3.678e-38	cg23412777	NM_015617.1	GeneID:26108	15	53668998	53668342	656	TRUE	15:53668831-53669077			DKFZp547G0910
AP2A2	0.239046	0.600377	0.708573	13.5031	3.678e-38	cg01321151	NM_012305.2	GeneID:161	11	915523	915841	318	TRUE	11:915181-916508			HIP9	HYPJ	ADTAB	CLAPA2
IL4I1	0.238278	0.6865	0.809784	24.8658	3.678e-38	cg04315771	NM_152899.1	GeneID:259307	19	55125761	55124574	1187	FALSE			cg04315771	FIG1
SLC16A3	0.238074	0.736538	0.868686	37.8638	3.678e-38	cg14417329	NM_004207.1	GeneID:9123	17	77779562	77780236	674	TRUE	17:77779304-77780821			MCT3	MCT4
ERO1L	0.236034	0.672869	0.792472	21.8678	3.678e-38	cg08554114	NM_014584.1	GeneID:30001	14	52232954	52232169	785	TRUE	14:52232942-52233321			ERO1-alpha
CLTB	0.234787	0.631184	0.742735	15.8798	3.678e-38	cg24735937	NM_001834.2	GeneID:1212	5	175776529	175776146	383	TRUE	5:175775649-175776532			LCB
OPRD1	0.233766	0.6901	0.811489	24.3047	3.678e-38	cg09970593	NM_000911.3	GeneID:4985	1	29012109	29011241	868	TRUE	1:29010989-29012442			OPRD
RAD51C	0.233418	0.670157	0.787848	20.8014	3.678e-38	cg19208681	NM_002876.2	GeneID:5889	17	54124627	54124962	335	TRUE	17:54124258-54125393			RAD51L2	MGC104277
C1orf124	0.232764	0.61025	0.717095	13.4471	3.678e-38	cg04636557	NM_032018.4	GeneID:83932	1	229539047	229540305	1258	TRUE	1:229538611-229539080			PRO4323	DDDL1880	dJ876B10.3	DKFZP547N043	RP5-876B10.3
CPA1	0.232729	0.672956	0.79076	21.0619	3.678e-38	cg15154229	NM_001868.1	GeneID:1357	7	129807247	129807591	344	FALSE			cg15154229	CPA
DIO1	0.232435	0.659373	0.774642	18.9944	3.678e-38	cg19526600	NM_000792.4	GeneID:1733	1	54132703	54132449	254	TRUE	1:54132535-54132774			5DI	TXDI1	MGC130050	MGC130051
INT1	0.232266	0.801155	0.941099	67.3587	3.678e-38	cg06942110	XM_931325.1	GeneID:26173	7	1511911	1510490	1421	TRUE	7:1511890-1512098
SLC39A14	0.231058	0.696841	0.817879	24.8724	3.678e-38	cg05254747	NM_015359.1	GeneID:23516	8	22279882	22280737	855	TRUE	8:22279618-22279947			ZIP14	LZT-Hs4	KIAA0062
RB1	0.230014	0.766277	0.898725	45.5947	3.678e-38	cg00059930	NT_024524.13	GeneID:5925	13	47792383			TRUE	13:47792306-47793951			RB	OSRC
GPR77	0.228937	0.713541	0.83625	27.8352	3.678e-38	cg10451565	NM_018485.1	GeneID:27202	19	52531971	52532211	240	FALSE			cg10451565	C5L2
MARK2	0.226063	0.719489	0.841542	28.2932	3.678e-38	cg06204948	NM_017490.1	GeneID:2011	11	63412666	63412651	15	FALSE			cg06204948	EMK1	PAR-1	MGC99619
MST1R	0.22578	0.746949	0.873489	36.0994	3.678e-38	cg08687163	NM_002447.1	GeneID:4486	3	49915857	49916074	217	TRUE	3:49915736-49916551			RON	PTK8	CDw136
CHMP4A	0.225761	0.697558	0.815721	23.5425	3.678e-38	cg07296772	NM_014169.2	GeneID:29082	14	23753368	23753025	343	FALSE			cg07296772	Shax2	CHMP4B	SNF7-1	HSPC134	C14orf123
PTGER1	0.223341	0.755198	0.881644	37.8479	3.678e-38	cg10468702	NM_000955.2	GeneID:5731	19	14446209	14447174	965	TRUE	19:14443018-14446252			EP1
FIGNL1	0.222442	0.674717	0.787196	18.9726	3.678e-38	cg05072008	NM_022116.2	GeneID:63979	7	50486141	50485542	599	TRUE	7:50485051-50486259
RGS5	0.220957	0.676364	0.788307	18.8849	3.678e-38	cg10604646	NM_003617.2	GeneID:8490	1	161439273	161439496	223	FALSE			cg10604646	MST092	MST106	MST129	MSTP032	MSTP092	MSTP106	MSTP129
SERPINB5	0.219667	0.668963	0.778984	17.5593	3.678e-38	cg23824713	NT_025028.13	GeneID:5268	18	59308718			TRUE	18:59308015-59308744			PI5	maspin
DSCR6	0.218593	0.663374	0.771902	16.6057	3.678e-38	cg12564962	NM_018962.1	GeneID:53820	21	37299808	37300733	925	TRUE	21:37299098-37301923			RIPPLY3
GDF5	0.218298	0.708396	0.82412	23.5195	3.678e-38	cg07378350	NM_000557.2	GeneID:8200	20	33490738	33489441	1297	TRUE	20:33490595-33490837			LAP4	CDMP1
OGFR	0.218126	0.677394	0.787959	18.3932	3.678e-38	cg21387281	NM_007346.2	GeneID:11054	20	60905884	60906622	738	FALSE			cg21387281
EXOC6	0.217857	0.68153	0.792623	18.9255	3.678e-38	cg19780563	NM_001013848.1	GeneID:54536	10	94584474	94584450	24	FALSE			cg19780563	SEC15L	Sec15p	FLJ1125	SEC15L1	FLJ11251	MGC33397	DKFZp761I2124
LTV1	0.21697	0.700209	0.813846	21.6538	3.678e-38	cg02885771	NM_032860.3	GeneID:84946	6	144205347	144206201	854	FALSE			cg02885771	C6orf93	FLJ14909	dJ468K18.4
RHOBTB1	0.216856	0.669166	0.777703	16.9612	3.678e-38	cg13320683	NM_014836.3	GeneID:9886	10	62431825	62431204	621	FALSE			cg13320683	KIAA0740	MGC33059	MGC33841
SLC7A9	0.216809	0.660892	0.768062	15.9306	3.678e-38	cg24734575	NM_014270.3	GeneID:11136	19	38052466	38052512	46	FALSE			cg24734575	CSNU3
DPM1	0.215789	0.76993	0.89415	39.834	3.678e-38	cg23293787	NM_003859.1	GeneID:8813	20	49009789	49008467	1322	TRUE	20:49007725-49009844			MPDS	CDGIE
HBZ	0.214962	0.754807	0.876085	33.9829	3.678e-38	cg21960110	NM_005332.2	GeneID:3050	16	142482	142854	372	FALSE			cg21960110
DUS4L	0.213628	0.704218	0.816612	21.46	3.678e-38	cg19770955	NM_181581.1	GeneID:11062	7	106990684	106991668	984	FALSE			cg19770955	DUS4	PP35
ARHGEF18	0.213077	0.71633	0.83034	23.5625	3.678e-38	cg02981853	NM_015318.2	GeneID:23370	19	7351850	7351866	16	FALSE			cg02981853	KIAA0521	MGC15913
GDF11	0.212838	0.742751	0.860823	29.5761	3.678e-38	cg00344358	NM_005811.2	GeneID:10220	12	54421960	54423331	1371	FALSE			cg00344358	BMP11	BMP-11
SCAND2	0.212496	0.682881	0.791248	17.9073	3.678e-38	cg17866455	NM_022050.2	GeneID:54581	15	82974955	82975713	758	TRUE	15:82974893-82975916
ALPK3	0.21192	0.703655	0.814994	20.9304	3.678e-38	cg07251857	NM_020778.1	GeneID:57538	15	83161221	83160915	306	TRUE	15:83161197-83161950			MAK	MIDORI	KIAA1330
CLCN7	0.2111	0.766141	0.886862	36.1165	3.678e-38	cg01443630	NM_001287.3	GeneID:1186	16	1465699	1465013	686	TRUE	16:1463327-1465791			CLC7	CLC-7	OPTA2
NFS1	0.210366	0.669306	0.774375	15.6483	3.678e-38	cg12552392	NM_181679.1	GeneID:9054	20	33751925	33750688	1237	FALSE			cg12552392	NIFS	HUSSY-08
HK2	0.210264	0.784996	0.908161	43.1784	3.678e-38	cg24107142	NM_000189.4	GeneID:3099	2	74913863	74913290	573	FALSE			cg24107142	HKII	HXK2	DKFZp686M1669
HPD	0.209462	0.68859	0.796187	18.0019	3.678e-38	cg12694870	NM_002150.2	GeneID:3242	12	120781063	120781152	89	FALSE			cg12694870	PPD
PFDN2	0.207439	0.729998	0.842882	24.6188	3.678e-38	cg05650171	NM_012394.2	GeneID:5202	1	159355726	159354462	1264	FALSE			cg05650171	PFD2
ASB10	0.207402	0.682504	0.788024	16.7003	3.678e-38	cg13289321	NM_080871.2	GeneID:136371	7	150514936	150515411	475	TRUE	7:150514816-150515041
BUB3	0.206594	0.703764	0.812116	19.5832	3.678e-38	cg04058169	NM_001007793.1	GeneID:9184	10	124903428	124903860	432	TRUE	10:124903424-124904818			BUB3L	hBUB3
ARF5	0.205815	0.681315	0.785786	16.2108	3.678e-38	cg12288726	NM_001662.2	GeneID:381	7	127015093	127015753	660	TRUE	7:127014895-127016535
CDIPT	0.205783	0.744985	0.859201	27.5823	3.678e-38	cg24235633	NM_145752.1	GeneID:10423	16	29782678	29782012	666	TRUE	16:29782371-29782821			PIS	PIS1	MGC1328
FLJ35784	0.205454	0.686237	0.791265	16.7609	3.678e-38	cg23174481	NM_198534.1	GeneID:374877	19	7468555	7468485	70	FALSE			cg23174481
OLFML2A	0.204356	0.66727	0.76881	14.263	3.678e-38	cg20789824	NM_182487.1	GeneID:169611	9	126602682	126602974	292	FALSE			cg20789824	FLJ00237	PRO34319
ADORA2A	0.204083	0.67514	0.77773	15.0648	3.678e-38	cg21584430	NM_000675.3	GeneID:135	22	23159462	23159092	370	TRUE	22:23159378-23159731			RDC8	hA2aR	ADORA2
FAM20B	0.203394	0.682542	0.785881	15.8414	3.678e-38	cg01426743	NM_014864.2	GeneID:9917	1	177260866	177261697	831	TRUE	1:177260801-177261024
ISG20	0.203334	0.712732	0.820609	20.2118	3.678e-38	cg02334775	NM_002201.4	GeneID:3669	15	86983680	86983043	637	TRUE	15:86983615-86983821			CD25	HEM45
MSLN	0.202282	0.768466	0.884133	32.9263	3.678e-38	cg06100324	NM_005823.4	GeneID:10232	16	751348	751134	214	FALSE			cg06100324	MPF	SMR	CAK1
RB1	0.201703	0.748893	0.861268	27.0999	3.678e-38	cg07880715	NT_024524.13	GeneID:5925	13	47793479			TRUE	13:47792306-47793951			RB	OSRC
LGICZ1	0.201495	0.677609	0.779175	14.8448	3.678e-38	cg26545162	NM_180990.2	GeneID:353174	17	71586687	71586904	217	FALSE			cg26545162	L2	ZAC	LGICZ	MGC129841
PDLIM1	0.201276	0.710849	0.817273	19.3616	3.678e-38	cg06542614	NM_020992.2	GeneID:9124	10	97041245	97040771	474	TRUE	10:97039852-97041246			CLIM1	CLP36	ELFIN	CLP-36	hCLIM1
OSTalpha	0.201132	0.682987	0.785162	15.4139	3.678e-38	cg12894629	NM_152672.3	GeneID:200931	3	197427114	197427780	666	FALSE			cg12894629	MGC39807
PROC	0.200884	0.725563	0.833964	21.8159	3.678e-38	cg26718585	NM_000312.1	GeneID:5624	2	127892924	127892487	437	FALSE			cg26718585	PROC1	protein C
F10	0.199863	0.751772	0.863478	27.1649	3.678e-38	cg21367957	NM_000504.2	GeneID:2159	13	112824253	112825146	893	FALSE			cg21367957	FX	FXA
SMPD2	0.197355	0.734912	0.842646	22.5774	3.678e-38	cg20811607	NM_003080.1	GeneID:6610	6	109867524	109868659	1135	TRUE	6:109867223-109867542			NSMASE
SPG7	0.196142	0.679341	0.778273	14.0357	3.678e-38	cg15206445	NM_003119.2	GeneID:6687	16	88100813	88102306	1493	TRUE	16:88100339-88100886			CAR	PGN	CMAR	MGC126331	MGC126332
CCR10	0.195321	0.740872	0.848283	23.137	3.678e-38	cg09509673	NM_016602.1	GeneID:2826	17	38087223	38087371	148	FALSE			cg09509673	GPR2
FES	0.194441	0.730107	0.835447	20.8211	3.678e-38	cg24888049	NM_002005.2	GeneID:2242	15	89227671	89228713	1042	FALSE			cg24888049	FPS
ZDHHC21	0.193995	0.727786	0.832534	20.2698	3.678e-38	cg04217218	NM_178566.2	GeneID:340481	9	14683888	14683474	414	FALSE			cg04217218
BCAP31	0.193765	0.72472	0.828895	19.686	3.678e-38	cg27453644	NM_005745.6	GeneID:10134	X	152643968	152643081	887	TRUE	X:152643867-152644966			CDM	BAP31	6C6-AG	DXS1357E
SERPINB13	0.192478	0.689038	0.787381	14.377	3.678e-38	cg18121684	NM_012397.2	GeneID:5275	18	59405541	59405580	39	FALSE			cg18121684	HUR7	PI13	headpin	MGC126870
OGFOD1	0.185579	0.726914	0.8267	17.9211	3.678e-38	cg22244418	NM_018233.2	GeneID:55239	16	55041618	55042954	1336	FALSE			cg22244418	FLJ10826	KIAA1612
ADPRHL1	0.182983	0.796303	0.903986	33.4377	3.678e-38	cg00463202	NM_199162.1	GeneID:113622	13	113155711	113155840	129	TRUE	13:113155311-113155833			ARH2
AVP	0.178216	0.714185	0.808088	14.3751	3.678e-38	cg25551168	NM_000490.3	GeneID:551	20	3013343	3013370	27	FALSE			cg25551168	VP	ADH	ARVP	AVRP	AVP-NPII
SEMA3B	0.176675	0.805123	0.910011	33.484	3.678e-38	cg08097657	NT_022517.17	GeneID:7869	3	50289000			TRUE	3:50287560-50290055			SemA	SEMA5	SEMAA	semaV	LUCA-1	FLJ34863
EGFL8	0.173858	0.767965	0.86632	21.8938	3.678e-38	cg18699916	NM_030652.1	GeneID:80864	6	32241907	32241921	14	FALSE			cg18699916	NG3	PPT2	C6orf8
PNMT	0.173002	0.715475	0.806628	13.4603	3.678e-38	cg12894984	NM_002686.2	GeneID:5409	17	35077157	35078033	876	TRUE	17:35077148-35078655			PENT
URP2	0.172452	0.807076	0.909552	32.1192	3.678e-38	cg24088438	NM_031471.4	GeneID:83706	11	63730805	63730782	23	FALSE			cg24088438	KIND3	MIG2B	MGC10966
GP1BB	0.171057	0.802126	0.9031	29.7548	3.678e-38	cg05726109	NM_000407.3	GeneID:2812	22	18089755	18091066	1311	TRUE	22:18089052-18090230			CD42c
MGC2747	0.168799	0.762912	0.857607	19.2853	3.678e-38	cg25903122	NM_024104.2	GeneID:79086	19	16626692	16625876	816	FALSE			cg25903122
CARD10	0.167702	0.755303	0.848408	17.6673	3.678e-38	cg13797282	NM_014550.3	GeneID:29775	22	36244805	36245156	351	TRUE	22:36244679-36245921			BIMP1	CARMA3
PROZ	0.167164	0.734393	0.824612	14.4235	3.678e-38	cg25734864	NM_003891.1	GeneID:8858	13	112860987	112860969	18	FALSE			cg25734864	PZ
ADRA1D	0.166828	0.859767	0.965164	56.3818	3.678e-38	cg09614401	NM_000678.2	GeneID:146	20	4177009	4177659	650	TRUE	20:4176404-4178574			DAR	ADRA1	ADRA1A	ADRA1R	ALPHA1	dJ779E11.2
DUSP2	0.166336	0.740168	0.83062	14.9777	3.678e-38	cg01148741	NM_004418.2	GeneID:1844	2	96175180	96174906	274	TRUE	2:96173982-96175216			PAC1	PAC-1
APOA1	0.165337	0.782978	0.878053	22.2587	3.678e-38	cg19324627	NM_000039.1	GeneID:335	11	116213539	116213548	9	FALSE			cg19324627	MGC117399
WDR24	0.165088	0.771549	0.865087	19.7722	3.678e-38	cg09852871	NM_032259.1	GeneID:84219	16	679599	680401	802	TRUE	16:679249-679645			JFP7	DKFZp434F054
CTSW	0.164727	0.788494	0.883865	23.2955	3.678e-38	cg03887787	NM_001335.2	GeneID:1521	11	65404108	65403860	248	FALSE			cg03887787	LYPN
FLJ32569	0.163758	0.743805	0.833211	14.8448	3.678e-38	cg14893161	NM_152491.3	GeneID:148811	1	204085874	204085868	6	TRUE	1:204085476-204086074
PSPN	0.163272	0.758886	0.849819	16.9827	3.678e-38	cg10280342	NM_004158.2	GeneID:5623	19	6327576	6326860	716	FALSE			cg10280342	PSP
KRT8	0.161563	0.74495	0.833225	14.4797	3.678e-38	cg01835489	NM_002273.2	GeneID:3856	12	51585577	51585127	450	FALSE			cg01835489	K8	KO	CK8	CYK8	K2C8	CARD2
FLJ36046	0.1591	0.825326	0.921551	31.942	3.678e-38	cg18604842	NM_152612.2	GeneID:164592	22	20317190	20317086	104	TRUE	22:20316941-20317222
MRPS18C	0.155982	0.756182	0.842523	14.6195	3.678e-38	cg26365668	NM_016067.1	GeneID:51023	4	84594997	84596196	1199	FALSE			cg26365668	CGI-134	FLJ11146	FLJ22967	MRPS18-1	MRP-S18-1
APXL2	0.155565	0.818069	0.911212	27.6184	3.678e-38	cg16609957	NM_133456.1	GeneID:134549	5	132189766	132189901	135	TRUE	5:132188724-132189822			KIAA1960
ATP10A	0.155522	0.823443	0.917171	29.3791	3.678e-38	cg20119871	NT_026446.13	GeneID:57194	15	23523493			TRUE	15:23522920-23523591			ATPVA	ATPVC	ATP10C	KIAA0566
GRB7	0.155076	0.828936	0.923003	31.1126	3.678e-38	cg03684977	NM_005310.2	GeneID:2886	17	35147329	35147713	384	FALSE			cg03684977
OGDHL	0.15291	0.782309	0.869779	17.9871	3.678e-38	cg24356544	NM_018245.1	GeneID:55753	10	50640869	50640375	494	FALSE			cg24356544
FLJ32569	0.152755	0.787585	0.87555	18.9469	3.678e-38	cg14159672	NM_152491.3	GeneID:148811	1	204085802	204085868	66	TRUE	1:204085476-204086074
FANCG	0.152674	0.755869	0.840245	13.8026	3.678e-38	cg05293216	NM_004629.1	GeneID:2189	9	35070812	35070013	799	TRUE	9:35070751-35071158			FAG	XRCC9
PLEKHA4	0.149208	0.767252	0.850853	14.4478	3.678e-38	cg08077345	NM_020904.1	GeneID:57664	19	54064085	54063670	415	FALSE			cg08077345	PEPP1
CLDN18	0.147929	0.791641	0.87712	18.1392	3.678e-38	cg17298704	NM_001002026.2	GeneID:51208	3	139200297	139200348	51	TRUE	3:139200225-139200459
C5orf14	0.145409	0.813737	0.900029	21.9984	3.678e-38	cg22197830	NM_024715.2	GeneID:79770	5	134237683	134237326	357	TRUE	5:134237650-134238765			UNQ335	FLJ22625
C9orf84	0.14428	0.812497	0.897955	21.2472	3.678e-38	cg06643227	NM_173521.2	GeneID:158401	9	113597060	113597109	49	TRUE	9:113597023-113597512			FLJ32779	FLJ44067	MGC43661
FLJ32011	0.143371	0.772827	0.853574	13.771	3.678e-38	cg19987219	NM_182516.1	GeneID:148930	1	46789336	46788271	1065	FALSE			cg19987219
SCMH1	0.14316	0.860309	0.950058	37.7638	3.678e-38	cg03387723	NM_012236.1	GeneID:22955	1	41481051	41480375	676	TRUE	1:41479380-41481067			Scml3
TMC6	0.141199	0.822387	0.906946	22.5104	3.678e-38	cg04947157	NM_007267.5	GeneID:11322	17	73640076	73640083	7	TRUE	17:73638939-73640147			EV1	EVER1	EVIN1	LAK-4P
TNS3	0.140218	0.815275	0.898492	20.3432	3.678e-38	cg24499411	NM_022748.9	GeneID:64759	7	47546772	47545724	1048	TRUE	7:47546572-47546780			TEM6	TENS1	FLJ13732	FLJ35545	MGC88434	H_NH049I23.2	DKFZp686M1045
MSLN	0.135686	0.792123	0.870238	14.433	3.678e-38	cg17501569	NM_005823.4	GeneID:10232	16	751065	751134	69	TRUE	16:750966-751193			MPF	SMR	CAK1
UPK1B	0.133953	0.786706	0.86325	13.2099	3.678e-38	cg22842233	NM_006952.3	GeneID:7348	3	120374758	120375115	357	FALSE			cg22842233	UPIB	UPK1	TSPAN20
MRPL28	0.133321	0.830758	0.911188	21.3351	3.678e-38	cg10805676	NM_006428.3	GeneID:10573	16	361991	360541	1450	TRUE	16:361973-362371			p15	MAAT1	MGC8499
POLR3H	0.132203	0.824035	0.903114	19.2789	3.678e-38	cg02738086	NM_138338.2	GeneID:171568	22	40271440	40270416	1024	TRUE	22:40271432-40271864			RPC8	KIAA1665	MGC29654	MGC111097
NYD-SP18	0.13115	0.836314	0.915903	21.8814	3.678e-38	cg10157098	NM_032599.1	GeneID:84691	7	128142203	128142679	476	FALSE			cg10157098
SLC16A3	0.130745	0.801018	0.877003	14.3855	3.678e-38	cg18345635	NM_004207.1	GeneID:9123	17	77779369	77780236	867	TRUE	17:77779304-77780821			MCT3	MCT4
CLEC4A	0.130636	0.794521	0.869823	13.4221	3.678e-38	cg01007201	NM_016184.2	GeneID:50856	12	8166472	8167495	1023	FALSE			cg01007201	DCIR	LLIR	DDB27	CLECSF6	HDCGC13P
EIF3S2	0.128812	0.81384	0.889847	15.9714	3.678e-38	cg26093687	NM_003757.1	GeneID:8668	1	32459457	32460613	1156	FALSE			cg26093687	TRIP1	TRIP-1	PRO2242	eIF3-p36	eIF3-beta
C21orf123	0.128008	0.859273	0.939	27.6184	3.678e-38	cg02706881	NM_199175.1	GeneID:378832	21	45670203	45669413	790	FALSE			cg02706881	PRED80
NMB	0.127889	0.801918	0.876251	13.7424	3.678e-38	cg19517291	NM_021077.3	GeneID:4828	15	83002043	83002806	763	TRUE	15:83001875-83003051			MGC2277	MGC3936	MGC17211
ARHGEF11	0.127426	0.814011	0.88918	15.5313	3.678e-38	cg14265075	NM_014784.2	GeneID:9826	1	155283145	155281786	1359	TRUE	1:155281626-155283454			GTRAP48	KIAA0380	PDZ-RHOGEF
DDX43	0.126238	0.864412	0.943457	28.5378	3.678e-38	cg17188169	NM_018665.1	GeneID:55510	6	74161109	74161192	83	TRUE	6:74160911-74162067			HAGE	DKFZp434H2114
SEC22L3	0.120952	0.824487	0.89659	15.2673	3.678e-38	cg22638542	NM_032970.2	GeneID:9117	3	42599577	42598432	1145	FALSE			cg22638542	SEC22C	MGC5373	MGC13261	DKFZp761F2321
MTSS1	0.120733	0.831847	0.904457	16.6487	3.678e-38	cg18939260	NM_014751.2	GeneID:9788	8	125810527	125809840	687	TRUE	8:125809049-125810637			MIM	MIMA	MIMB	KIAA0429
ZBTB7B	0.120231	0.843094	0.916366	18.9695	3.678e-38	cg01782486	NM_015872.1	GeneID:51043	1	153253136	153253548	412	FALSE			cg01782486	ZFP67	ZBTB15	c-Krox	hcKrox	DKFZp686G01254
PYY2	0.117598	0.82375	0.893708	14.0649	3.678e-38	cg25191725	NM_021093.1	GeneID:23615	17	23578348	23577967	381	TRUE	17:23578220-23579432
GTF3C3	0.114277	0.843182	0.912687	16.5847	3.678e-38	cg19160878	NM_012086.1	GeneID:9330	2	197373269	197372670	599	TRUE	2:197372231-197373576			TFIIIC102	TFIIICgamma	TFiiiC2-102
NEIL1	0.111584	0.838887	0.906346	14.6792	3.678e-38	cg12978308	NM_024608.1	GeneID:79661	15	73426486	73426463	23	TRUE	15:73426133-73428129			NEI1	hFPG1	FLJ22402
AFAR3	0.106853	0.870891	0.937842	20.2301	3.678e-38	cg23625458	NM_201252.1	GeneID:246181	1	19472728	19473022	294	TRUE	1:19472685-19473594			AKR7A4
LOC92345	0.105167	0.851472	0.91586	14.7676	3.678e-38	cg18023724	NM_138386.1	GeneID:92345	4	164307943	164307523	420	TRUE	4:164306691-164308033
NNAT	0.0990608	0.86606	0.927616	15.4139	3.678e-38	cg12862537	NT_011362.9	GeneID:4826	20	35582093			TRUE	20:35581886-35583655			Peg5	MGC1439
DNAJC5B	0.0907285	0.881426	0.938637	15.3263	3.678e-38	cg02067021	NM_033105.3	GeneID:85479	8	67096581	67096349	232	FALSE			cg02067021	CSP-beta	MGC26226
CSNK1G2	0.0896049	0.879339	0.935686	14.3612	3.678e-38	cg24355006	NM_001319.5	GeneID:1455	19	1920744	1920719	25	TRUE	19:1920418-1921208			CK1g2
PKDREJ	0.0888835	0.892349	0.949055	17.3152	3.678e-38	cg08315277	NM_006071.1	GeneID:10343	22	45038062	45037883	179	TRUE	22:45036485-45038116
GAMT	0.0874126	0.884436	0.93968	14.5416	3.678e-38	cg05989054	NM_000156.4	GeneID:2593	19	1353626	1352552	1074	TRUE	19:1353612-1353877			PIG2	TP53I2
GP1BA	-0.0878786	0.934823	0.87958	-13.7256	3.678e-38	cg11340260	NM_000173.3	GeneID:2811	17	4776256	4776372	116	FALSE			cg11340260	BSS	GP1B	CD42B	MGC34595	CD42b-alpha
GATA5	-0.0967453	0.934989	0.874346	-16.3843	3.678e-38	cg20822628	NT_011362.9	GeneID:140628	20	60474987			TRUE	20:60474622-60475245			bB379O24.1
CST7	-0.0987752	0.919235	0.858406	-13.7757	3.678e-38	cg09971811	NM_003650.2	GeneID:8530	20	24878099	24877866	233	FALSE			cg09971811	CMAP	cystatin F
DBH	-0.101353	0.93459	0.871186	-17.6874	3.678e-38	cg07824742	NM_000787.2	GeneID:1621	9	135491605	135491306	299	TRUE	9:135491544-135491749			DBM
CXorf55	-0.103727	0.959078	0.892543	-25.9889	3.678e-38	cg07621042	NM_152425.1	GeneID:139804	X	114331024	114331223	199	TRUE	X:114330002-114333488			FLJ40249
P2RX4	-0.1063	0.918474	0.853232	-15.5687	3.678e-38	cg17917518	NM_002560.2	GeneID:5025	12	120131566	120132047	481	TRUE	12:120131509-120132994			P2X4	P2X4R
CHIT1	-0.106805	0.934167	0.867507	-19.2544	3.678e-38	cg17725472	NM_003465.1	GeneID:1118	1	201465380	201465399	19	FALSE			cg17725472	CHI3	CHIT	MGC125322
ATAD3C	-0.106927	0.922188	0.85631	-16.5379	3.678e-38	cg27383362	XM_933664.1	GeneID:219293	1	1375234	1374938	296	TRUE	1:1375151-1375634
F2	-0.109182	0.915917	0.849159	-15.846	3.678e-38	cg00371195	NM_000506.2	GeneID:2147	11	46697057	46697331	274	FALSE			cg00371195	PT
CD6	-0.110937	0.944397	0.874499	-23.5148	3.678e-38	cg09902130	NM_006725.2	GeneID:923	11	60495754	60495750	4	FALSE			cg09902130	TP120
CDYL	-0.113393	0.897779	0.829917	-13.7707	3.678e-38	cg14831798	NM_004824.2	GeneID:9425	6	4651426	4651392	34	FALSE			cg14831798	CDYL1	MGC131936	DKFZP586C1622
BTBD2	-0.114026	0.93794	0.866662	-22.5854	3.678e-38	cg26927807	NM_017797.3	GeneID:55643	19	1967532	1966702	830	TRUE	19:1967362-1967575
LAMC2	-0.120469	0.882714	0.811999	-13.104	3.678e-38	cg00208830	NM_005562.1	GeneID:3918	1	181421401	181422022	621	FALSE			cg00208830	B2T	EBR2	BM600	EBR2A	LAMB2T	LAMNB2
GPR31	-0.120912	0.888312	0.816897	-13.9782	3.678e-38	cg22182975	NM_005299.1	GeneID:2853	6	167491162	167491309	147	FALSE			cg22182975
ZNF385	-0.122067	0.919388	0.844798	-20.143	3.678e-38	cg12962778	NM_015481.1	GeneID:25946	12	53064579	53064748	169	FALSE			cg12962778	HZF	RZF	ZFP385	DKFZP586G1122
GUCY1B2	-0.123983	0.897589	0.823673	-16.1852	3.678e-38	cg24821554	NM_004129.2	GeneID:2974	13	50537954	50538143	189	FALSE			cg24821554	GC-SB2
LTK	-0.1244	0.925392	0.848942	-22.3577	3.678e-38	cg07930578	NM_206961.1	GeneID:4058	15	39593880	39593369	511	FALSE			cg07930578	TYK1
HDAC7A	-0.127247	0.92087	0.843127	-21.9933	3.678e-38	cg15820955	NM_015401.1	GeneID:51564	12	46479206	46479190	16	FALSE			cg15820955	HDAC7	DKFZP586J0917
TSPAN3	-0.127889	0.896523	0.820471	-16.9116	3.678e-38	cg21377793	NM_005724.4	GeneID:10099	15	75151574	75150568	1006	TRUE	15:75151406-75151606			TM4-A	TM4SF8	TSPAN-3
CIZ1	-0.130161	0.87322	0.797887	-13.7791	3.678e-38	cg05826823	NM_012127.2	GeneID:25792	9	130007893	130006483	1410	FALSE			cg05826823	LSFR1	ZNF356
SSX5	-0.13092	0.876517	0.800478	-14.3594	3.678e-38	cg18616655	NM_021015.3	GeneID:6758	X	47941190	47941143	47	TRUE	X:47941128-47941340			MGC9494
PISD	-0.133836	0.898427	0.81883	-18.7712	3.678e-38	cg15823100	NM_014338.3	GeneID:23761	22	30357580	30356810	770	FALSE			cg15823100	PSSC	DJ858B16	dJ858B16.2	DKFZP566G2246
ASZ1	-0.134532	0.866865	0.789684	-13.7888	3.678e-38	cg16540704	NM_130768.1	GeneID:136991	7	116854652	116854779	127	TRUE	7:116854400-116855316			ALP1	GASZ	Orf3	ANKL1	C7orf7	MGC26634
C10orf39	-0.134779	0.861412	0.784582	-13.1401	3.678e-38	cg05942970	NM_194303.1	GeneID:282973	10	133805517	133805422	95	TRUE	10:133805370-133805647			FLJ37857
MGC52423	-0.136278	0.86582	0.787778	-13.9782	3.678e-38	cg09988116	NM_182517.1	GeneID:149466	1	43523280	43523826	546	FALSE			cg09988116
ZFYVE19	-0.137986	0.895808	0.814098	-19.2544	3.678e-38	cg08659539	NM_032850.3	GeneID:84936	15	38885480	38886724	1244	FALSE			cg08659539	MPFYVE	FLJ14840
C9orf116	-0.138678	0.897571	0.81531	-19.7722	3.678e-38	cg26224139	NM_144654.1	GeneID:138162	9	137533581	137533401	180	TRUE	9:137533389-137533681			MGC29761	RP11-426A6.4
KCNH6	-0.140634	0.929591	0.843251	-28.6319	3.678e-38	cg06849227	NM_030779.2	GeneID:81033	17	58953426	58954427	1001	TRUE	17:58953345-58953593			ERG2	HERG2	Kv11.2
MPZL1	-0.140958	0.856427	0.776708	-13.6763	3.678e-38	cg18596794	NM_003953.4	GeneID:9019	1	165956515	165957832	1317	TRUE	1:165955684-165956570			PZR	PZRa	PZRb	PZR1b	FLJ21047
MOCS1	-0.141346	0.859372	0.779169	-14.1069	3.678e-38	cg03422350	NM_138928.1	GeneID:4337	6	40003649	40003433	216	FALSE			cg03422350	MIG11	MOCOD	MOCS1A	MOCS1B	KIAA0381
LOC349236	-0.145056	0.885735	0.801009	-19.0299	3.678e-38	cg01120307	NM_182635.1	GeneID:349236	9	91168969	91169386	417	FALSE			cg01120307
C11orf42	-0.147361	0.848608	0.766209	-13.8619	3.678e-38	cg13162577	NM_173525.1	GeneID:160298	11	6183013	6183374	361	FALSE			cg13162577	MGC34805
AFF3	-0.148276	0.919381	0.829583	-27.8306	3.678e-38	cg07349094	NM_002285.2	GeneID:3899	2	100125446	100125469	23	TRUE	2:100125280-100125484			LAF4	MLLT2-like
LYPD4	-0.149719	0.964159	0.869118	-48.1526	3.678e-38	cg15142488	NM_173506.3	GeneID:147719	19	47040787	47040348	439	TRUE	19:47039969-47041322			MGC42718
TSSK2	-0.149997	0.887482	0.799846	-20.526	3.678e-38	cg14727512	NM_053006.3	GeneID:23617	22	17498918	17498790	128	TRUE	22:17498763-17499877			DGS-G	SPOGA2	STK22B	FLJ38613
TMEM43	-0.154938	0.873663	0.784699	-19.0733	3.678e-38	cg14375111	NM_024334.1	GeneID:79188	3	14140187	14141546	1359	FALSE			cg14375111	MGC3222	DKFZp586G1919
FTMT	-0.155764	0.845537	0.759003	-14.9648	3.678e-38	cg11234457	NM_177478.1	GeneID:94033	5	121215446	121215549	103	TRUE	5:121215121-121216200			MTF
LOC161931	-0.156796	0.844378	0.75742	-15.004	3.678e-38	cg07595943	NM_139174.2	GeneID:161931	16	82782402	82782245	157	TRUE	16:82781939-82782678
DGKA	-0.157723	0.854415	0.76593	-16.5889	3.678e-38	cg13634319	NM_001345.4	GeneID:1606	12	54609994	54611213	1219	FALSE			cg13634319	DAGK	DAGK1	MGC12821	MGC42356	DGK-alpha
PCDH12	-0.158515	0.830652	0.74422	-13.7169	3.678e-38	cg12845808	NM_016580.2	GeneID:51294	5	141318788	141318811	23	FALSE			cg12845808	VECAD2	VE-cadherin-2
DAND5	-0.159623	0.829817	0.742901	-13.7993	3.678e-38	cg16854606	NM_152654.2	GeneID:199699	19	12941743	12941432	311	FALSE			cg16854606	SP1	CER2	COCO	CRL2	DANTE	GREM3	CKTSF1B3
EDG7	-0.161468	0.863479	0.77205	-18.7681	3.678e-38	cg24574111	NM_012152.1	GeneID:23566	1	85103672	85104430	758	TRUE	1:85103596-85103832			GPCR	LPA3	Edg-7	LP-A3	LPAR3	HOFNH30	RP4-678I3
MAGEA10	-0.163319	0.889049	0.793893	-24.0528	3.678e-38	cg19964192	NM_021048.3	GeneID:4109	X	151057709	151057681	28	TRUE	X:151057621-151057831			MAGE10	MGC10599
TM7SF2	-0.164195	0.856606	0.764458	-18.2196	3.678e-38	cg20277416	NM_003273.1	GeneID:7108	11	64635637	64635950	313	TRUE	11:64635369-64637106			ANG1	DHCR14A
GPR115	-0.164292	0.871988	0.778132	-20.838	3.678e-38	cg23613030	NM_153838.1	GeneID:221393	6	47761615	47761559	56	FALSE			cg23613030	PGR18	FLJ38076
PHF20	-0.164733	0.917057	0.818101	-32.2067	3.678e-38	cg08013810	NM_016436.3	GeneID:51230	20	33852653	33852827	174	FALSE			cg08013810	NZF	TZP	GLEA2	HCA58	FLJ33479	C20orf104
TMEM86B	-0.165006	0.876238	0.781538	-21.8121	3.678e-38	cg01076838	NM_173804.3	GeneID:255043	19	60432494	60432444	50	TRUE	19:60432437-60432654			MGC30208
TULP2	-0.168656	0.811294	0.721785	-13.2639	3.678e-38	cg18971671	NM_003323.1	GeneID:7288	19	54093533	54093750	217	FALSE			cg18971671	TUBL2
SLC4A5	-0.168821	0.814898	0.724908	-13.6709	3.678e-38	cg00945862	NM_021196.2	GeneID:57835	2	74423748	74423170	578	FALSE			cg00945862	NBC4	MGC129662
FAM9A	-0.170212	0.84384	0.749931	-17.478	3.678e-38	cg00600110	NM_174951.2	GeneID:171482	X	8729528	8729424	104	TRUE	X:8729086-8729604
PTPRS	-0.170701	0.836244	0.742928	-16.5233	3.678e-38	cg27299588	NM_002850.2	GeneID:5802	19	5237082	5237399	317	FALSE			cg27299588	PTPSIGMA
NSDHL	-0.172669	0.816138	0.724078	-14.3749	3.678e-38	cg10349665	NM_015922.1	GeneID:50814	X	151748843	151750167	1324	FALSE			cg10349665	H105E3	XAP104
OXER1	-0.17325	0.81402	0.721907	-14.2495	3.678e-38	cg19863773	NM_148962.3	GeneID:165140	2	42845409	42844905	504	FALSE			cg19863773	GPCR	GPR170	TG1019
PHYHD1	-0.174073	0.815119	0.72247	-14.4797	3.678e-38	cg12754854	NM_174933.2	GeneID:254295	9	130722680	130723508	828	FALSE			cg12754854	MGC16638
TMEM40	-0.174726	0.825552	0.731386	-15.8268	3.678e-38	cg03534410	NM_018306.2	GeneID:55287	3	12776112	12775808	304	FALSE			cg03534410	FLJ11036
FOXI1	-0.174902	0.803199	0.711496	-13.406	3.678e-38	cg00661485	NM_012188.3	GeneID:2299	5	169465950	169465495	455	TRUE	5:169465816-169466196			HFH3	FKHL10	FREAC6	MGC34197
MAGEB2	-0.175775	0.821906	0.727627	-15.5469	3.678e-38	cg17299712	NM_002364.3	GeneID:4113	X	30143683	30143601	82	TRUE	X:30143315-30143806			DAM6	MGC26438	MAGE-XP-2
MRGPRX2	-0.176299	0.830907	0.735329	-16.7896	3.678e-38	cg13062935	NM_054030.2	GeneID:117194	11	19039090	19038804	286	FALSE			cg13062935	MRGX2
L2HGDH	-0.176328	0.805518	0.712845	-13.8381	3.678e-38	cg20189937	NM_024884.1	GeneID:79944	14	49849874	49848697	1177	FALSE			cg20189937	FLJ12618	C14orf160
MAGEA12	-0.176398	0.802403	0.710054	-13.5444	3.678e-38	cg02504280	NM_005367.4	GeneID:4111	X	151655163	151653828	1335	FALSE			cg02504280	MAGE12
GPR55	-0.184326	0.835632	0.735406	-18.9563	3.678e-38	cg13531460	NM_005683.2	GeneID:9290	2	231499057	231498185	872	FALSE			cg13531460
TSPAN4	-0.184534	0.8154	0.717497	-16.2575	3.678e-38	cg03116740	NM_003271.4	GeneID:7106	11	831335	832824	1489	FALSE			cg03116740	NAG2	NAG-2	TM4SF7	TSPAN-4	TETRASPAN
GDEP	-0.185197	0.849924	0.747532	-21.3439	3.678e-38	cg02255004	XR_000540.1	GeneID:118425	4	80967684	80967563	121	FALSE			cg02255004
DEFA5	-0.18544	0.815858	0.717449	-16.488	3.678e-38	cg15481539	NM_021010.1	GeneID:1670	8	6900851	6901669	818	FALSE			cg15481539	DEF5	HD-5	MGC129728
PTPN3	-0.185664	0.837308	0.736198	-19.4222	3.678e-38	cg26646980	NM_002829.2	GeneID:5774	9	111265489	111265557	68	FALSE			cg26646980	PTPH1	DKFZp686N0569
CYB561D2	-0.18611	0.878796	0.772438	-27.3688	3.678e-38	cg18797282	NM_007022.3	GeneID:11068	3	50362150	50363301	1151	FALSE			cg18797282	101F6	TSP10
CD79B	-0.186996	0.822524	0.722532	-17.5928	3.678e-38	cg07973967	NM_000626.1	GeneID:974	17	59363339	59363446	107	TRUE	17:59363260-59363460			B29	IGB
NCL	-0.187721	0.871093	0.764812	-25.9704	3.678e-38	cg26862286	NM_005381.2	GeneID:4691	2	232038551	232037449	1102	TRUE	2:232036571-232039010			C23	FLJ45706
GATA5	-0.188384	0.847344	0.743619	-21.5629	3.678e-38	cg04132607	NT_011362.9	GeneID:140628	20	60474851			TRUE	20:60474622-60475245			bB379O24.1
C20orf85	-0.190848	0.803451	0.703895	-15.8575	3.678e-38	cg15310873	NM_178456.2	GeneID:128602	20	56159499	56159389	110	TRUE	20:56159084-56159699			bA196N14.1
CBFA2T3	-0.191047	0.827967	0.725274	-19.0634	3.678e-38	cg23606023	NM_005187.4	GeneID:863	16	87570449	87570902	453	FALSE			cg23606023	ETO2	MTG16	MTGR2	ZMYND4
TAS1R2	-0.192736	0.773194	0.676502	-13.119	3.678e-38	cg21731286	NM_152232.1	GeneID:80834	1	19059392	19058742	650	FALSE			cg21731286	TR2	T1R2	GPR71
C10orf27	-0.193946	0.785792	0.686948	-14.4272	3.678e-38	cg01560871	NM_152710.1	GeneID:219793	10	72215430	72215163	267	FALSE			cg01560871	spatial	FLJ32820
PDHA2	-0.194591	0.872702	0.762585	-27.9788	3.678e-38	cg27108154	NM_005390.3	GeneID:5161	4	96980400	96980266	134	TRUE	4:96980084-96980953			PDHAL
DNAJA4	-0.195303	0.773903	0.675919	-13.525	3.678e-38	cg07061145	NM_018602.2	GeneID:55466	15	76343233	76343551	318	FALSE			cg07061145	MST104	MSTP104	PRO1472
ZNF558	-0.195678	0.89088	0.777883	-33.0444	3.678e-38	cg15751406	NM_144693.1	GeneID:148156	19	8795543	8794565	978	TRUE	19:8795536-8795751			FLJ30932
UBE2V2	-0.195879	0.778143	0.679351	-13.9828	3.678e-38	cg25612480	NM_003350.2	GeneID:7336	8	49083013	49083548	535	TRUE	8:49082930-49084059			MMS2	UEV2	EDPF1	UEV-2	DDVIT1	EDAF-1	EDPF-1	DDVit-1
TDO2	-0.196303	0.771276	0.673157	-13.427	3.678e-38	cg08121954	NM_005651.1	GeneID:6999	4	157044653	157044297	356	FALSE			cg08121954	TDO	TPH2	TRPO
DHX37	-0.196342	0.816846	0.712912	-18.4853	3.678e-38	cg00910168	NM_032656.2	GeneID:57647	12	124039974	124039620	354	TRUE	12:124039310-124040298			DDX37	MGC2695	MGC4322	KIAA1517	MGC46245
C10orf30	-0.196964	0.822427	0.717472	-19.323	3.678e-38	cg14784653	NM_152751.1	GeneID:222389	10	13585014	13584982	32	FALSE			cg14784653	FLJ40283	MGC35247
F2	-0.199506	0.808412	0.704005	-17.9178	3.678e-38	cg20199333	NM_000506.2	GeneID:2147	11	46697366	46697331	35	FALSE			cg20199333	PT
NUP37	-0.200591	0.778208	0.677192	-14.6195	2.07438e-20	cg08085165	NM_024057.2	GeneID:79023	12	101035541	101036491	950	FALSE			cg08085165	p37	MGC5585	FLJ22618
SLC39A4	-0.201404	0.789758	0.686856	-15.968	3.678e-38	cg11800672	NM_130849.1	GeneID:55630	8	145613099	145613081	18	FALSE			cg11800672	AEZ	ZIP4	FLJ20327
LOC124220	-0.201822	0.835633	0.726542	-22.2837	3.678e-38	cg26259865	NM_145252.1	GeneID:124220	16	2820360	2820234	126	FALSE			cg26259865	HRPE773	PRO1567
PCNXL2	-0.202843	0.839618	0.729491	-23.1348	3.678e-38	cg02385474	NM_024938.2	GeneID:80003	1	231461420	231461715	295	FALSE			cg02385474	FLJ11383	KIAA0435
PIK3R5	-0.203034	0.800045	0.695016	-17.4368	3.678e-38	cg09528351	NM_014308.1	GeneID:23533	17	8756991	8756559	432	FALSE			cg09528351	FOAP-2	P101-PI3K	F730038I15Rik
MALL	-0.203466	0.842409	0.7316	-23.7428	3.678e-38	cg09113530	NM_005434.3	GeneID:7851	2	110231030	110230937	93	FALSE			cg09113530	BENE	MGC4419
BZRAP1	-0.204027	0.793855	0.689164	-16.8259	3.678e-38	cg22182666	NM_004758.1	GeneID:9256	17	53760154	53760477	323	FALSE			cg22182666	PRAX-1	RIMBP1	RIM-BP1	KIAA0612
TSKS	-0.204297	0.770521	0.668782	-14.404	3.678e-38	cg05500074	NM_021733.1	GeneID:60385	19	54958148	54958327	179	FALSE			cg05500074	TSKS1
SLC22A16	-0.206742	0.873074	0.756512	-31.0673	3.678e-38	cg18521925	NM_033125.2	GeneID:85413	6	110905016	110904537	479	TRUE	6:110903841-110905894			CT2	OCT6	OKB1	FLIPT2	dJ261K5.1
CUGBP2	-0.207463	0.760271	0.658439	-13.9115	3.678e-38	cg15777781	NM_006561.2	GeneID:10659	10	11087277	11087290	13	FALSE			cg15777781	ETR-3	NAPOR	BRUNOL3
DEFB123	-0.208644	0.784111	0.678531	-16.4807	3.678e-38	cg26063872	NM_153324.2	GeneID:245936	20	29491867	29492072	205	FALSE			cg26063872	DEFB-23	ESC42-RELD
PLCE1	-0.209708	0.769139	0.665084	-15.0088	3.678e-38	cg23439277	NM_016341.2	GeneID:51196	10	95780864	95780559	305	FALSE			cg23439277	PLCE	KIAA1516
ZIM2	-0.20982	0.784454	0.678274	-16.6726	3.678e-38	cg00354258	NT_011109.15	GeneID:23619	19	61998550			TRUE	19:61998334-61999073
VNN1	-0.210228	0.785053	0.6786	-16.7891	3.678e-38	cg02184413	NM_004666.1	GeneID:8876	6	133076928	133076881	47	FALSE			cg02184413	Tiff66	MGC116930	MGC116931	MGC116932	MGC116933
CCIN	-0.210584	0.749023	0.647296	-13.3542	3.678e-38	cg20870362	NM_005893.1	GeneID:881	9	36159175	36159391	216	FALSE			cg20870362
FAM71B	-0.211522	0.842712	0.727787	-25.4599	3.678e-38	cg14376424	NM_130899.1	GeneID:153745	5	156525358	156525856	498	TRUE	5:156525249-156525506			MGC26988
IL27	-0.212812	0.807176	0.696475	-19.9644	3.678e-38	cg17122311	NM_145659.3	GeneID:246778	16	28424779	28425656	877	FALSE			cg17122311	p28	IL30	IL-27	IL27p28	MGC71873
MYL5	-0.213358	0.794088	0.684923	-18.3881	3.678e-38	cg23595927	NM_002477.1	GeneID:4636	4	661851	661711	140	TRUE	4:661751-662107
ANXA13	-0.214823	0.761718	0.656336	-14.9967	1.21425e-19	cg00283535	NM_004306.2	GeneID:312	8	124818745	124818828	83	FALSE			cg00283535	ISA	ANX13
GRB10	-0.214991	0.814842	0.702029	-21.4374	3.678e-38	cg03104936	NT_033968.5	GeneID:2887	7	50816662			TRUE	7:50816652-50818533			RSS	IRBP	MEG1	GRB-IR	KIAA0207
JOSD3	-0.215709	0.741792	0.638774	-13.3966	3.678e-38	cg21296602	NM_024116.1	GeneID:79101	11	93115708	93114308	1400	FALSE			cg21296602	MGC5306
DCUN1D1	-0.216173	0.742308	0.639013	-13.4883	3.678e-38	cg06785429	NM_020640.2	GeneID:54165	3	184182108	184181020	1088	FALSE			cg06785429	RP42	SCRO	Tes3	DCUN1L1
NRXN1	-0.2163	0.765823	0.659197	-15.616	3.678e-38	cg16279786	NM_004801.2	GeneID:9378	2	51108810	51109107	297	TRUE	2:51107966-51109135			Hs.22998	KIAA0578
C21orf70	-0.216585	0.829499	0.713868	-24.0687	3.678e-38	cg21968796	NM_058190.2	GeneID:85395	21	45182960	45184383	1423	FALSE			cg21968796	PRED56
LAT	-0.217068	0.738689	0.635503	-13.2994	3.678e-38	cg23797100	NM_014387.3	GeneID:27040	16	28903554	28903648	94	FALSE			cg23797100	LAT1	pp36
REEP6	-0.219814	0.802617	0.689188	-20.557	3.678e-38	cg22759185	NM_138393.1	GeneID:92840	19	1443038	1442165	873	TRUE	19:1441050-1443157			DP1L1	TB2L1	C19orf32	FLJ25383
GNLY	-0.220234	0.776116	0.666238	-17.3152	3.678e-38	cg11752275	NM_006433.2	GeneID:10578	2	85774547	85774925	378	FALSE			cg11752275	519	LAG2	NKG5	LAG-2	D2S69E	TLA519	lymphokine
ELA2A	-0.220739	0.770557	0.661235	-16.758	3.678e-38	cg15952725	NM_033440.1	GeneID:63036	1	15655777	15655811	34	FALSE			cg15952725	ELA1	PE-1
CYTL1	-0.221861	0.79393	0.680762	-19.7114	3.678e-38	cg00512031	NM_018659.2	GeneID:54360	4	5072877	5072098	779	FALSE			cg00512031	C17
SLC6A11	-0.222835	0.767907	0.658004	-16.7782	3.678e-38	cg09395732	NM_014229.1	GeneID:6538	3	10832456	10832917	461	TRUE	3:10832452-10833630			GAT3	GAT-3
GADL1	-0.222843	0.814876	0.698247	-22.8742	3.678e-38	cg15946807	NM_207359.1	GeneID:339896	3	30868233	30867341	892	FALSE			cg15946807	MGC138191
SLC1A6	-0.224857	0.832398	0.712266	-26.2545	3.678e-38	cg06192619	NM_005071.1	GeneID:6511	19	14944616	14944730	114	TRUE	19:14944390-14944752			EAAT4	MGC33092	MGC43671
SLC2A7	-0.224967	0.732911	0.627089	-13.7888	3.678e-38	cg16084788	NM_207420.1	GeneID:155184	1	9008733	9008991	258	FALSE			cg16084788	GLUT7
DAZL	-0.225599	0.873346	0.74692	-36.0313	3.678e-38	cg06429195	NM_001351.2	GeneID:1618	3	16621586	16622010	424	TRUE	3:16620846-16622270			DAZH	DAZL1	DAZLA	SPGYLA	MGC26406
BTC	-0.225658	0.751065	0.642314	-15.4472	3.678e-38	cg19302283	NM_001729.1	GeneID:685	4	75939422	75938853	569	FALSE			cg19302283
	-0.225921	0.795712	0.680373	-20.6265	3.678e-38	cg16878021		GeneID:3500	14	105280508	105280452	56	FALSE			cg16878021
KRTAP20-1	-0.226296	0.724543	0.619359	-13.2726	3.678e-38	cg26565975	NM_181615.1	GeneID:337975	21	30910487	30910645	158	FALSE			cg26565975	KAP20.1
FAM3D	-0.226985	0.831704	0.710624	-26.5521	3.678e-38	cg02194211	NM_138805.2	GeneID:131177	3	58627386	58627601	215	FALSE			cg02194211	EF7	OIT1
C1orf127	-0.227593	0.878489	0.750281	-38.0298	3.678e-38	cg00912942	NM_173507.1	GeneID:148345	1	10947071	10946845	226	FALSE			cg00912942	FLJ37118	FLJ37833
STON2	-0.227867	0.807658	0.689657	-22.6639	3.678e-38	cg10334928	NM_033104.2	GeneID:85439	14	80934760	80934680	80	FALSE			cg10334928	STN2	STNB	STNB2
FKBP9	-0.230321	0.740633	0.631349	-15.071	3.678e-38	cg17786776	NM_007270.2	GeneID:11328	7	32962670	32963577	907	TRUE	7:32962641-32964267			FKBP60	FKBP63	PPIase	MGC126772	MGC138258
ERV3	-0.23103	0.783911	0.667913	-19.8935	3.678e-38	cg27542948	NM_001007253.1	GeneID:2086	7	64091119	64090719	400	FALSE			cg27542948	H-PLK	HERV-R
QPRT	-0.231092	0.803443	0.684526	-22.5903	3.678e-38	cg25023941	NM_014298.3	GeneID:23475	16	29597536	29597942	406	FALSE			cg25023941	QPRTase
TNS3	-0.235051	0.738363	0.627354	-15.4815	3.678e-38	cg06871974	NM_022748.9	GeneID:64759	7	47545485	47545724	239	TRUE	7:47545432-47545633			TEM6	TENS1	FLJ13732	FLJ35545	MGC88434	H_NH049I23.2	DKFZp686M1045
LASS3	-0.236498	0.717588	0.609091	-13.9062	3.678e-38	cg25004981	NM_178842.2	GeneID:204219	15	98902551	98902448	103	TRUE	15:98901825-98902776			MGC27091
PAGE4	-0.236953	0.713567	0.605487	-13.663	3.678e-38	cg04636194	NM_007003.2	GeneID:9506	X	49480892	49480644	248	FALSE			cg04636194	JM27	GAGE-9	GAGEC1	PAGE-1	PAGE-4	FLJ35184
MFAP3	-0.237008	0.743219	0.630624	-16.2326	3.678e-38	cg03707950	NM_005927.3	GeneID:4238	5	153397269	153398752	1483	FALSE			cg03707950
CCND1	-0.238372	0.807993	0.684937	-24.5682	3.678e-38	cg04717045	NT_078088.3	GeneID:595	11	69177970			TRUE	11:69177944-69178494			BCL1	PRAD1	U21B31	D11S287E	cyclin D1
ANKRD7	-0.238411	0.728443	0.617486	-15.0088	3.678e-38	cg11075556	NM_019644.1	GeneID:56311	7	117652348	117652195	153	TRUE	7:117652310-117652692			TSA806
SLC43A3	-0.238853	0.791959	0.671121	-22.2755	3.678e-38	cg19881895	NM_017611.2	GeneID:29015	11	56952116	56951629	487	FALSE			cg19881895	EEG1	FOAP-13	PRO1659	SEEEG-1	DKFZp762A227
NTSR2	-0.239105	0.767386	0.650184	-19.1245	3.678e-38	cg02092466	NM_012344.2	GeneID:23620	2	11728082	11727876	206	FALSE			cg02092466	NTR2
DNAHL1	-0.239384	0.788613	0.668039	-21.8814	3.678e-38	cg23753610	NM_173628.1	GeneID:284176	17	74079425	74078999	426	FALSE			cg23753610	FLJ40457
HCFC1	-0.239964	0.77097	0.652832	-19.6762	3.678e-38	cg14784348	NM_005334.1	GeneID:3054	X	152883127	152883371	244	FALSE			cg14784348	HCF1	HFC1	HCF-1	MGC70925
FLJ38379	-0.242285	0.818601	0.692049	-27.177	3.678e-38	cg16173109	XR_001026.1	GeneID:285097	2	242594120	242594150	30	TRUE	2:242594067-242595375
TTLL10	-0.243809	0.851606	0.719193	-34.6235	3.678e-38	cg19584957	NM_153254.1	GeneID:254173	1	1104442	1104940	498	TRUE	1:1104363-1104588			TTLL5	FLJ36119	FLJ42131	RP5-902P8.1
SAGE1	-0.245601	0.822273	0.693558	-28.4955	3.678e-38	cg24101388	NM_018666.1	GeneID:55511	X	134803309	134803451	142	TRUE	X:134803096-134803517			SAGE
CLDN10	-0.245632	0.748193	0.631061	-17.9417	3.678e-38	cg08418978	NM_006984.3	GeneID:9071	13	94883970	94883859	111	TRUE	13:94883884-94884336			OSP-L	CPETRL3
LOC253012	-0.245708	0.777832	0.656025	-21.4255	3.678e-38	cg04992673	NM_198151.1	GeneID:253012	7	92686650	92686806	156	FALSE			cg04992673
DIO1	-0.247017	0.762937	0.642879	-19.7715	3.678e-38	cg03886898	NM_000792.4	GeneID:1733	1	54131720	54132449	729	FALSE			cg03886898	5DI	TXDI1	MGC130050	MGC130051
OPTC	-0.24768	0.751077	0.632594	-18.5443	3.678e-38	cg05657520	NM_014359.3	GeneID:26254	1	201729144	201729894	750	FALSE			cg05657520	OPT
CD79B	-0.247949	0.799697	0.673419	-24.9624	3.678e-38	cg25729716	NM_000626.1	GeneID:974	17	59364339	59363446	893	FALSE			cg25729716	B29	IGB
PAQR4	-0.249547	0.8294	0.697659	-30.7801	3.678e-38	cg13644052	NM_152341.2	GeneID:124222	16	2950411	2951591	1180	TRUE	16:2950064-2950462			FLJ30002
PIK3C2B	-0.250484	0.719212	0.60458	-15.699	3.678e-38	cg12467090	NM_002646.2	GeneID:5287	1	202725762	202726097	335	FALSE			cg12467090	C2-PI3K
IL1F5	-0.250585	0.792455	0.666102	-24.2975	3.678e-38	cg21378206	NM_012275.2	GeneID:26525	2	113533514	113532686	828	FALSE			cg21378206	FIL1	FIL1D	IL1L1	IL1HY1	IL1RP3	MGC29840	FIL1(DELTA)
CPA3	-0.251444	0.6861	0.576362	-13.1989	3.678e-38	cg13424229	NM_001870.1	GeneID:1359	3	150064527	150065774	1247	FALSE			cg13424229
SERPINB5	-0.251758	0.806919	0.677709	-26.895	3.678e-38	cg07331725	NT_025028.13	GeneID:5268	18	59308458			TRUE	18:59308015-59308744			PI5	maspin
MRC1	-0.251933	0.712979	0.598739	-15.3258	1.99893e-17	cg08704606	NM_002438.1	GeneID:4360	10	18139116	18138358	758	FALSE			cg08704606	CD206	CLEC13D
KLF17	-0.25239	0.712597	0.598228	-15.3494	2.88423e-20	cg08679985	NM_173484.2	GeneID:128209	1	44356937	44357109	172	TRUE	1:44356865-44357284			ZNF393	Zfp393	FLJ40160	RP4-675G8.1
CRYGB	-0.254461	0.729693	0.611702	-17.2085	3.678e-38	cg13384498	NM_005210.2	GeneID:1419	2	208718874	208719125	251	FALSE			cg13384498	CRYG2
ACF	-0.254487	0.707724	0.593275	-15.1725	2.08873e-08	cg03817621	NM_014576.2	GeneID:29974	10	52315405	52315441	36	FALSE			cg03817621	ASP	ACF64	ACF65	RP11-564C4.2
CHRNA1	-0.254578	0.800627	0.671112	-26.3303	3.678e-38	cg22925639	NM_000079.1	GeneID:1134	2	175336985	175337416	431	FALSE			cg22925639	ACHRA	ACHRD	CHRNA	CMS2A	FCCMS	SCCMS
SMAF1	-0.254655	0.756595	0.634168	-20.1408	3.678e-38	cg14271690	NM_001018082.1	GeneID:149685	20	36643413	36643252	161	FALSE			cg14271690	KIAA1219	MGC39724	RP5-1100H13.2
KRT2A	-0.254917	0.690434	0.578608	-13.874	3.678e-38	cg16405957	NM_000423.2	GeneID:3849	12	51332060	51332226	166	FALSE			cg16405957	KRTE	KRT2E	MGC116967	MGC116968
CCDC17	-0.255021	0.802632	0.672586	-26.7607	3.678e-38	cg09893068	NM_152500.1	GeneID:149483	1	45862180	45862316	136	FALSE			cg09893068	FLJ33084	RP4-697E16.4
C20orf114	-0.255054	0.700013	0.58658	-14.6046	3.678e-38	cg04405541	NM_033197.2	GeneID:92747	20	31334066	31334602	536	FALSE			cg04405541	LPLUNC1	MGC14597
FLJ31222	-0.255316	0.721075	0.60412	-16.5169	3.678e-38	cg21639401	NM_207388.1	GeneID:388387	17	38304194	38304247	53	FALSE			cg21639401
TTLL11	-0.255994	0.716296	0.599833	-16.1412	3.678e-38	cg27218220	NM_194252.1	GeneID:158135	9	123896217	123895384	833	TRUE	9:123896020-123896348			C9orf20	bA244O19.1
FLJ20160	-0.257242	0.690275	0.577543	-14.1242	3.678e-38	cg15998761	NM_017694.2	GeneID:54842	2	191009029	191008944	85	FALSE			cg15998761
YY2	-0.257291	0.733441	0.613639	-17.982	3.678e-38	cg01662650	NM_206923.1	GeneID:404281	X	21784244	21784524	280	TRUE	X:21783686-21784939			ZNF631
LAIR2	-0.257511	0.895182	0.748846	-52.5395	3.678e-38	cg00269932	NM_002288.3	GeneID:3904	19	59705108	59705825	717	FALSE			cg00269932	CD306	MGC71634
PTPN3	-0.258416	0.732769	0.612599	-18.0568	3.678e-38	cg17824393	NM_002829.2	GeneID:5774	9	111265640	111265557	83	FALSE			cg17824393	PTPH1	DKFZp686N0569
RASIP1	-0.259235	0.728365	0.608571	-17.7165	3.678e-38	cg23082877	NM_017805.2	GeneID:54922	19	53935239	53935782	543	FALSE			cg23082877	RAIN	FLJ20401
CPM	-0.261733	0.784172	0.654066	-24.9437	3.678e-38	cg20932053	NM_001874.3	GeneID:1368	12	67644360	67643287	1073	FALSE			cg20932053
NPC1L1	-0.262376	0.726391	0.605602	-17.9431	3.678e-38	cg14477619	NM_013389.1	GeneID:29881	7	44547406	44547439	33	FALSE			cg14477619
MGC29671	-0.263378	0.687595	0.572859	-14.5583	3.678e-38	cg01138020	NM_182538.3	GeneID:201305	17	4283843	4283968	125	FALSE			cg01138020
SLC11A1	-0.264055	0.814809	0.678528	-30.7725	3.678e-38	cg18854666	NM_000578.2	GeneID:6556	2	218955299	218955161	138	FALSE			cg18854666	LSH	NRAMP	NRAMP1
PPP3R2	-0.2646	0.680543	0.566504	-14.1844	3.678e-38	cg02602411	NM_147180.2	GeneID:5535	9	103396998	103397104	106	TRUE	9:103396568-103397298			PPP3RL
C1orf24	-0.265508	0.684963	0.569825	-14.59	3.678e-38	cg25182523	NM_022083.1	GeneID:116496	1	183210911	183210305	606	FALSE			cg25182523	NIBAN
TFF1	-0.266206	0.680769	0.566062	-14.3556	3.678e-38	cg02643667	NM_003225.2	GeneID:7031	21	42659768	42659713	55	FALSE			cg02643667	pS2	BCEI	HPS2	HP1.A	pNR-2	D21S21
MLC1	-0.266482	0.674198	0.56049	-13.9115	3.678e-38	cg05861567	NM_015166.2	GeneID:23209	22	48865813	48866041	228	TRUE	22:48865755-48865963			VL	LVM	MLC	KIAA0027
MGMT	-0.266836	0.729683	0.606469	-18.8817	3.678e-38	cg12040555	NT_008818.15	GeneID:4255	10	131211820			TRUE	10:131211399-131211975
CLDN8	-0.267501	0.6783	0.563503	-14.3077	3.678e-38	cg04052038	NM_199328.1	GeneID:9073	21	30509994	30510189	195	FALSE			cg04052038
MORC1	-0.267926	0.87672	0.728127	-48.4282	3.678e-38	cg19857541	NM_014429.2	GeneID:27136	3	110319490	110319658	168	TRUE	3:110319373-110319935			MORC	ZCW6
SKIV2L	-0.267945	0.738395	0.613238	-19.9276	3.678e-38	cg09583599	NM_006929.4	GeneID:6499	6	32033899	32034560	661	FALSE			cg09583599	HLP	170A	SKI2	DDX13	SKI2W	SKIV2
C19orf18	-0.268392	0.805323	0.668614	-29.7855	3.678e-38	cg02449608	NM_152474.2	GeneID:147685	19	63178412	63177716	696	FALSE			cg02449608	MGC41906
CSPG3	-0.268733	0.776868	0.644838	-25.0212	3.678e-38	cg13118849	NM_004386.1	GeneID:1463	19	19188542	19188762	220	FALSE			cg13118849	NCAN
SHRM	-0.26962	0.66623	0.552663	-13.6803	3.678e-38	cg14898892	NM_020859.1	GeneID:57619	4	77575204	77575277	73	FALSE			cg14898892	MSTP013	KIAA1481
KRTAP9-3	-0.269768	0.74708	0.619668	-21.1911	3.678e-38	cg11710560	NM_031962.2	GeneID:83900	17	36642670	36642241	429	FALSE			cg11710560	KAP9.3	KRTAP9.3
GLIS1	-0.269852	0.801488	0.664758	-29.3577	3.678e-38	cg06941093	NM_147193.1	GeneID:148979	1	53972284	53972465	181	FALSE			cg06941093	FLJ36155
DNAJC5B	-0.269957	0.663113	0.549949	-13.4909	3.678e-38	cg13760253	NM_033105.3	GeneID:85479	8	67095254	67096349	1095	FALSE			cg13760253	CSP-beta	MGC26226
EPPB9	-0.271577	0.795079	0.658654	-28.4792	3.678e-38	cg02629257	NM_015681.2	GeneID:27077	17	19212220	19211551	669	FALSE			cg02629257	B9
ROS1	-0.272256	0.714266	0.591429	-17.9991	3.678e-38	cg21166999	NM_002944.2	GeneID:6098	6	117853486	117853711	225	FALSE			cg21166999	ROS	MCF3
NPDC1	-0.274014	0.700497	0.579322	-16.8865	3.678e-38	cg26581729	NM_015392.2	GeneID:56654	9	139059613	139060476	863	TRUE	9:139059540-139061122			CAB	CAB-	CAB1	CAB-1	DKFZP586J0523
AKR1D1	-0.274048	0.675031	0.558248	-14.7452	3.678e-38	cg20647137	NM_005989.2	GeneID:6718	7	137411829	137411736	93	FALSE			cg20647137	SRD5B1	3o5bred
KCTD17	-0.2741	0.658377	0.544455	-13.5821	3.678e-38	cg22229142	NM_024681.1	GeneID:79734	22	35777252	35777562	310	TRUE	22:35777251-35778239			FLJ12242
FLJ37587	-0.274793	0.706773	0.584197	-17.5928	3.678e-38	cg01703884	NM_173597.1	GeneID:283446	12	108362557	108362755	198	TRUE	12:108362343-108362608
LOC92017	-0.275828	0.71011	0.586534	-18.0463	3.678e-38	cg10240083	NM_001009607.1	GeneID:92017	16	12515883	12516525	642	FALSE			cg10240083	FLJ00143	A-388D4.1
C2	-0.276182	0.735909	0.607694	-20.8198	3.25689e-26	cg14301635	NM_000063.3	GeneID:717	6	32003182	32003473	291	FALSE			cg14301635	CO2	DKFZp779M0311
C7orf34	-0.276206	0.686894	0.56721	-15.9629	3.678e-38	cg22298208	NM_178829.2	GeneID:135927	7	142345733	142346721	988	FALSE			cg22298208	ctm-1
PSTPIP1	-0.27683	0.714948	0.59012	-18.6603	3.678e-38	cg12703269	NM_003978.2	GeneID:9051	15	75073287	75074609	1322	FALSE			cg12703269	H-PIP	PAPAS	CD2BP1	PSTPIP	CD2BP1L	CD2BP1S
MGMT	-0.277986	0.795581	0.656149	-29.789	3.678e-38	cg00904483	NT_008818.15	GeneID:4255	10	131244863			TRUE	10:131244704-131245359
STATH	-0.278746	0.736146	0.60681	-21.181	3.678e-38	cg00436282	NM_003154.2	GeneID:6779	4	70896038	70896237	199	FALSE			cg00436282	STR
C10orf129	-0.27917	0.716677	0.590589	-19.1225	3.678e-38	cg12647587	NM_207321.1	GeneID:142827	10	96944242	96943947	295	FALSE			cg12647587	bA310E22.3
ATP1A4	-0.279723	0.729933	0.601281	-20.6265	3.678e-38	cg19250891	NM_144699.2	GeneID:480	1	158388036	158387987	49	FALSE			cg19250891	ATP1A1	ATP1AL2	MGC25056
CRYGA	-0.28016	0.647854	0.533507	-13.4603	3.678e-38	cg17055734	NM_014617.2	GeneID:1418	2	208736304	208736633	329	TRUE	2:208736106-208736449			CRYG1	CRYG5	CRY-g-A
TP73	-0.280624	0.82155	0.676328	-35.727	3.678e-38	cg03568718	NT_004321.17	GeneID:7161	1	3569733			TRUE	1:3569653-3570185			P73
ABCA4	-0.281466	0.859214	0.706922	-46.1732	3.678e-38	cg04592706	NM_000350.1	GeneID:24	1	94359180	94359267	87	FALSE			cg04592706	FFM	RMP	ABCR	RP19	STGD	ABC10	CORD3	STGD1	DKFZp781N1972
SLC24A5	-0.281479	0.835153	0.68712	-39.256	3.678e-38	cg19409156	NM_205850.1	GeneID:283652	15	46200332	46200461	129	FALSE			cg19409156	JSX	NCKX5
MRGPRX4	-0.282477	0.648166	0.532908	-13.7131	3.678e-38	cg09691574	NM_054032.2	GeneID:117196	11	18150250	18150960	710	FALSE			cg09691574	GPCR	MRGX4	SNSR6
KRTAP5-9	-0.283247	0.841221	0.691265	-41.2831	3.678e-38	cg26832211	NM_005553.2	GeneID:3846	11	70936899	70937114	215	FALSE			cg26832211	KRN1	KRTAP5-1	KRTAP5.9
KCNJ16	-0.283358	0.648403	0.532777	-13.8017	1.99503e-18	cg26960719	NM_170741.1	GeneID:3773	17	65582897	65583021	124	FALSE			cg26960719	KIR5.1	MGC33717
LTB	-0.283466	0.655462	0.538538	-14.2916	3.678e-38	cg18656170	NM_002341.1	GeneID:4050	6	31659404	31658181	1223	FALSE			cg18656170	p33	TNFC	TNFSF3
RUNX3	-0.283762	0.724843	0.59542	-20.6142	3.678e-38	cg02723372	NT_004610.18	GeneID:864	1	25101169			TRUE	1:25101076-25101799			AML2	CBFA3	PEBP2aC
RGS3	-0.283941	0.844383	0.693529	-42.3034	3.678e-38	cg19944367	NM_134427.1	GeneID:5998	9	115263596	115264200	604	FALSE			cg19944367	C2PA	RGP3	FLJ20370	FLJ31516	FLJ90496	PDZ-RGS3
ALPK1	-0.284179	0.759194	0.623456	-24.9442	3.678e-38	cg24866437	NM_025144.2	GeneID:80216	4	113518456	113518301	155	FALSE			cg24866437	LAK	FLJ22670	KIAA1527	8430410J10Rik
FLJ20581	-0.284272	0.653295	0.536457	-14.2221	3.678e-38	cg04428453	NM_017888.2	GeneID:54988	16	20328153	20328357	204	TRUE	16:20327801-20328182
BNC2	-0.285035	0.723609	0.593882	-20.6384	3.58172e-12	cg14613546	NM_017637.4	GeneID:54796	9	16719103	16717995	1108	FALSE			cg14613546	BSN2	FLJ20043	FLJ34928	DKFZp686A01127
IL18R1	-0.285082	0.806046	0.661519	-33.2032	3.678e-38	cg17869167	NM_003855.2	GeneID:8809	2	102346136	102345529	607	FALSE			cg17869167	IL1RRP	CDw218a	IL-1Rrp
GRIP1	-0.286081	0.684333	0.56124	-16.8695	3.678e-38	cg09414535	XM_934800.1	GeneID:23426	12	65359289	65359186	103	FALSE			cg09414535
FXYD3	-0.286667	0.727783	0.596632	-21.3157	3.678e-38	cg02633817	NM_021910.1	GeneID:5349	19	40298572	40298639	67	FALSE			cg02633817	MAT8	PLML	MAT-8	MGC111076
MGMT	-0.286949	0.864715	0.70875	-49.5	3.678e-38	cg03271907	NT_008818.15	GeneID:4255	10	131302633			TRUE	10:131302456-131302963
DSCR1L1	-0.288024	0.804457	0.658869	-33.4571	3.678e-38	cg17142149	NM_005822.1	GeneID:10231	6	46400975	46401364	389	FALSE			cg17142149	CSP2	RCN2	MCIP2	hRCN2	ZAKI-4
FUT7	-0.288253	0.641142	0.525027	-13.7879	3.678e-38	cg09305224	NM_004479.2	GeneID:2529	9	139047066	139047283	217	FALSE			cg09305224
MORC1	-0.288651	0.826854	0.676918	-38.7468	3.678e-38	cg04167867	NM_014429.2	GeneID:27136	3	110319820	110319658	162	TRUE	3:110319373-110319935			MORC	ZCW6
GCKR	-0.289243	0.776682	0.635584	-28.489	3.678e-38	cg20022122	NM_001486.2	GeneID:2646	2	27573626	27573210	416	FALSE			cg20022122	GKRP
FOXI1	-0.289735	0.710333	0.581089	-19.8167	3.678e-38	cg19233472	NM_012188.3	GeneID:2299	5	169465330	169465495	165	TRUE	5:169465139-169465394			HFH3	FKHL10	FREAC6	MGC34197
MUC15	-0.290457	0.835777	0.683367	-41.4722	3.678e-38	cg16215361	NM_145650.2	GeneID:143662	11	26551196	26550356	840	FALSE			cg16215361
FLJ31222	-0.290543	0.815584	0.666817	-36.426	3.678e-38	cg15140807	NM_207388.1	GeneID:388387	17	38304736	38304247	489	FALSE			cg15140807
CD69	-0.291133	0.694608	0.567675	-18.4539	5.20999e-30	cg05590294	NM_001781.1	GeneID:969	12	9804662	9804764	102	FALSE			cg05590294	CLEC2C
S100A1	-0.291473	0.740979	0.60543	-23.616	3.678e-38	cg14467840	NM_006271.1	GeneID:6271	1	151867596	151867497	99	FALSE			cg14467840	S100	S100A
MUC5B	-0.291536	0.697275	0.569695	-18.7616	3.678e-38	cg22407504	XM_039877.12	GeneID:4587	11	1199666	1200930	1264	TRUE	11:1199482-1199813
KCNJ1	-0.293044	0.741559	0.605245	-23.9023	3.678e-38	cg05193832	NM_000220.2	GeneID:3758	11	128242054	128242478	424	FALSE			cg05193832	ROMK	ROMK1	KIR1.1
INSL4	-0.293088	0.778795	0.635616	-29.5618	3.678e-38	cg12067261	NM_002195.1	GeneID:3641	9	5221539	5221419	120	FALSE			cg12067261	EPIL	PLACENTIN
ABLIM1	-0.293301	0.705722	0.575893	-19.7943	3.678e-38	cg05064181	NM_002313.5	GeneID:3983	10	116435388	116434404	984	FALSE			cg05064181	ABLIM	LIMAB1	LIMATIN	MGC1224	FLJ14564	KIAA0059	DKFZp781D0148
MGMT	-0.294363	0.81454	0.664202	-37.008	3.678e-38	cg02330106	NM_002412.2	GeneID:4255	10	131154830	131155456	626	TRUE	10:131154808-131155770
VPREB3	-0.294626	0.682186	0.556175	-17.7013	3.678e-38	cg26574610	NM_013378.1	GeneID:29802	22	22425989	22426592	603	FALSE			cg26574610	8HS20	N27C7-2
KCNQ1	-0.294737	0.688028	0.560895	-18.2599	3.678e-38	cg26750319	NT_009237.17	GeneID:3784	11	2550536			TRUE	11:2550370-2550883			LQT	RWS	WRS	LQT1	ATFB1	KCNA8	KCNA9	Kv1.9	Kv7.1	KVLQT1
KCNE2	-0.295349	0.650827	0.530343	-15.1379	3.678e-38	cg04409427	NM_172201.1	GeneID:9992	21	34657893	34658193	300	FALSE			cg04409427	LQT5	LQT6	MIRP1	MGC138292
AVP	-0.295683	0.727307	0.592527	-22.5362	3.678e-38	cg16536918	NM_000490.3	GeneID:551	20	3013403	3013370	33	FALSE			cg16536918	VP	ADH	ARVP	AVRP	AVP-NPII
GABRG3	-0.296394	0.627517	0.510978	-13.6562	3.678e-38	cg27592112	NM_033223.1	GeneID:2567	15	25343690	25343765	75	FALSE			cg27592112
C12orf40	-0.296731	0.676181	0.550475	-17.408	3.678e-38	cg22941086	NM_173599.1	GeneID:283461	12	38306150	38306252	102	TRUE	12:38306053-38306365			FLJ40126
B3GALT1	-0.296808	0.78463	0.638729	-31.2662	3.678e-38	cg25427580	NM_020981.2	GeneID:8708	2	168383603	168383428	175	TRUE	2:168383423-168383626			MGC126594	beta3Gal-T1
FLJ30046	-0.297068	0.654089	0.532366	-15.5728	3.678e-38	cg19782598	NM_144595.2	GeneID:122060	13	77213286	77213490	204	FALSE			cg19782598
HSDL1	-0.297803	0.698102	0.567899	-19.5873	3.678e-38	cg26359240	NM_031463.3	GeneID:83693	16	82737460	82736265	1195	FALSE			cg26359240	MGC125994	MGC125995
VNN2	-0.298262	0.737313	0.599606	-24.1254	3.678e-38	cg10044101	NM_004665.2	GeneID:8875	6	133125982	133126291	309	FALSE			cg10044101	FOAP-4	GPI-80
HSD17B1	-0.300032	0.803417	0.652563	-35.727	3.678e-38	cg26729026	NM_000413.1	GeneID:3292	17	37957989	37957510	479	FALSE			cg26729026	HSD17	EDHB17	EDH17B2
FRMD4A	-0.300225	0.617322	0.501343	-13.3408	3.678e-38	cg25464840	NM_018027.2	GeneID:55691	10	14412916	14412889	27	FALSE			cg25464840	FRMD4	FLJ10210	KIAA1294	bA295P9.4
LOC124220	-0.300361	0.626662	0.508881	-13.9481	3.678e-38	cg05461841	NM_145252.1	GeneID:124220	16	2819945	2820234	289	FALSE			cg05461841	HRPE773	PRO1567
C16orf44	-0.300545	0.87256	0.708471	-56.0233	3.678e-38	cg23617760	NM_024731.2	GeneID:79786	16	83239008	83239632	624	FALSE			cg23617760	FLJ12543
FAM71A	-0.300557	0.627387	0.5094	-14.0161	3.678e-38	cg10531372	NM_153606.1	GeneID:149647	1	210864986	210864439	547	TRUE	1:210864887-210865172			FLJ32796	RP11-338C15.4
SULT2B1	-0.300965	0.813347	0.660201	-38.1537	3.678e-38	cg00698688	NM_177973.1	GeneID:6820	19	53747244	53747241	3	FALSE			cg00698688	HSST2
TBC1D5	-0.301595	0.661454	0.536674	-16.6766	3.678e-38	cg01765641	NM_014744.1	GeneID:9779	3	17756892	17757403	511	TRUE	3:17756160-17756911			KIAA0210
GCNT3	-0.301682	0.679779	0.551508	-18.3158	3.678e-38	cg06817269	NM_004751.1	GeneID:9245	15	57696327	57696080	247	FALSE			cg06817269	GnT-M	C2/4GnT	C2GnT-M
SAG	-0.301699	0.683045	0.554152	-18.6235	3.678e-38	cg08096010	NM_000541.2	GeneID:6295	2	233881301	233881232	69	FALSE			cg08096010	ARRESTIN
VNN1	-0.305458	0.71855	0.58144	-22.83	3.678e-38	cg00852964	NM_004666.1	GeneID:8876	6	133076843	133076881	38	FALSE			cg00852964	Tiff66	MGC116930	MGC116931	MGC116932	MGC116933
PLCB2	-0.306742	0.807174	0.652572	-37.9243	3.678e-38	cg02240622	NM_004573.1	GeneID:5330	15	38388759	38387330	1429	FALSE			cg02240622
NSDHL	-0.306983	0.783924	0.63367	-33.0394	3.678e-38	cg10634358	NM_015922.1	GeneID:50814	X	151748838	151750167	1329	FALSE			cg10634358	H105E3	XAP104
GP9	-0.308751	0.718457	0.580039	-23.2858	3.678e-38	cg16098726	NM_000174.2	GeneID:2815	3	130261428	130262335	907	TRUE	3:130261348-130261588			CD42a
[truncated: 1,372 more rows]
