# Supplementary material for: A role for SUV39H1-mediated H3K9 trimethylation in the control of genome stability and senescence in WI38 human diploid lung fibroblasts
Source: Aging (Albany NY). 2014 Jul 21;6(7):545–63. doi: 10.18632/aging.100678 (PMC4153622; doi:10.18632/aging.100678)
Supplement: Supplementary file 2 [file aging-06-545-s002.xlsx]

## Sheet: PD38-PD47
Sublist	Category	Term	RT	Genes	Count	%	P-Value	Benjamini
	GOTERM_BP_FAT	response to hypoxia	RT		5	12.8	0.0003	0.2
	GOTERM_BP_FAT	response to oxygen levels	RT		5	12.8	0.00037	0.13
	GOTERM_BP_FAT	regulation of protein amino acid phosphorylation	RT		5	12.8	0.00079	0.18
	GOTERM_BP_FAT	regulation of phosphorylation	RT		7	17.9	0.00081	0.14
	GOTERM_BP_FAT	regulation of phosphate metabolic process	RT		7	17.9	0.001	0.14
	GOTERM_BP_FAT	regulation of phosphorus metabolic process	RT		7	17.9	0.001	0.14
	GOTERM_BP_FAT	positive regulation of protein amino acid phosphorylation	RT		4	10.3	0.0013	0.15
	GOTERM_BP_FAT	positive regulation of phosphorylation	RT		4	10.3	0.0017	0.16
	GOTERM_BP_FAT	positive regulation of phosphate metabolic process	RT		4	10.3	0.0018	0.16
	GOTERM_BP_FAT	positive regulation of phosphorus metabolic process	RT		4	10.3	0.0018	0.16
	GOTERM_BP_FAT	homeostatic process	RT		8	20.5	0.0019	0.15
	GOTERM_BP_FAT	negative regulation of protein amino acid phosphorylation	RT		3	7.7	0.0027	0.18
	GOTERM_BP_FAT	apoptosis	RT		7	17.9	0.003	0.18
	GOTERM_BP_FAT	programmed cell death	RT		7	17.9	0.0032	0.18
	GOTERM_BP_FAT	negative regulation of phosphorylation	RT		3	7.7	0.0054	0.26
	GOTERM_BP_FAT	regulation of cellular protein metabolic process	RT		6	15.4	0.0055	0.25
	GOTERM_BP_FAT	cell motion	RT		6	15.4	0.0055	0.24
	GOTERM_BP_FAT	regulation of protein modification process	RT		5	12.8	0.0055	0.23
	GOTERM_BP_FAT	negative regulation of phosphate metabolic process	RT		3	7.7	0.0061	0.23
	GOTERM_BP_FAT	negative regulation of phosphorus metabolic process	RT		3	7.7	0.0061	0.23
	GOTERM_BP_FAT	cell death	RT		7	17.9	0.0071	0.26
	GOTERM_BP_FAT	death	RT		7	17.9	0.0074	0.25
	GOTERM_BP_FAT	response to organic nitrogen	RT		3	7.7	0.01	0.32
	GOTERM_BP_FAT	positive regulation of protein modification process	RT		4	10.3	0.01	0.31
	GOTERM_BP_FAT	negative regulation of survival gene product expression	RT		2	5.1	0.017	0.44
	GOTERM_BP_FAT	regulation of protein amino acid autophosphorylation	RT		2	5.1	0.017	0.44
	GOTERM_BP_FAT	positive regulation of cellular protein metabolic process	RT		4	10.3	0.019	0.46
	GOTERM_BP_FAT	positive regulation of protein metabolic process	RT		4	10.3	0.021	0.48
	GOTERM_BP_FAT	positive regulation of cell motion	RT		3	7.7	0.024	0.51
	GOTERM_BP_FAT	cellular homeostasis	RT		5	12.8	0.026	0.53
	GOTERM_BP_FAT	regulation of mitochondrial membrane permeability	RT		2	5.1	0.027	0.52
	GOTERM_BP_FAT	developmental cell growth	RT		2	5.1	0.027	0.52
	GOTERM_BP_FAT	regulation of cellular component size	RT		4	10.3	0.028	0.53
	GOTERM_BP_FAT	response to protein stimulus	RT		3	7.7	0.028	0.52
	GOTERM_BP_FAT	cell migration	RT		4	10.3	0.029	0.52
	GOTERM_BP_FAT	cell surface receptor linked signal transduction	RT		10	25.6	0.03	0.52
	GOTERM_BP_FAT	negative regulation of macromolecule metabolic process	RT		6	15.4	0.031	0.52
	GOTERM_BP_FAT	negative regulation of protein modification process	RT		3	7.7	0.034	0.54
	GOTERM_BP_FAT	positive regulation of signal transduction	RT		4	10.3	0.035	0.54
	GOTERM_BP_FAT	response to organic cyclic substance	RT		3	7.7	0.035	0.53
	GOTERM_BP_FAT	regulation of release of sequestered calcium ion into cytosol	RT		2	5.1	0.036	0.53
	GOTERM_BP_FAT	cell motility	RT		4	10.3	0.038	0.54
	GOTERM_BP_FAT	localization of cell	RT		4	10.3	0.038	0.54
	GOTERM_BP_FAT	regulation of cell proliferation	RT		6	15.4	0.04	0.55
	GOTERM_BP_FAT	neuron apoptosis	RT		2	5.1	0.045	0.59
	GOTERM_BP_FAT	positive regulation of cell communication	RT		4	10.3	0.045	0.58
	GOTERM_BP_FAT	enzyme linked receptor protein signaling pathway	RT		4	10.3	0.05	0.61
	GOTERM_BP_FAT	regulation of survival gene product expression	RT		2	5.1	0.05	0.6
	GOTERM_BP_FAT	neuron recognition	RT		2	5.1	0.05	0.6
	GOTERM_BP_FAT	regulation of transferase activity	RT		4	10.3	0.061	0.67
	GOTERM_BP_FAT	cellular ion homeostasis	RT		4	10.3	0.062	0.66
	GOTERM_BP_FAT	positive regulation of protein kinase cascade	RT		3	7.7	0.062	0.65
	GOTERM_BP_FAT	cellular chemical homeostasis	RT		4	10.3	0.065	0.66
	GOTERM_BP_FAT	membrane organization	RT		4	10.3	0.065	0.65
	GOTERM_BP_FAT	regulation of calcium ion transport into cytosol	RT		2	5.1	0.068	0.67
	GOTERM_BP_FAT	negative regulation of cellular protein metabolic process	RT		3	7.7	0.071	0.67
	GOTERM_BP_FAT	growth	RT		3	7.7	0.073	0.68
	GOTERM_BP_FAT	mitochondrial membrane organization	RT		2	5.1	0.075	0.68
	GOTERM_BP_FAT	sensory perception of pain	RT		2	5.1	0.075	0.68
	GOTERM_BP_FAT	negative regulation of protein metabolic process	RT		3	7.7	0.076	0.68
	GOTERM_BP_FAT	ion homeostasis	RT		4	10.3	0.077	0.67
	GOTERM_BP_FAT	positive regulation of cell proliferation	RT		4	10.3	0.079	0.68
	GOTERM_BP_FAT	axonogenesis	RT		3	7.7	0.08	0.68
	GOTERM_BP_FAT	regulation of cell motion	RT		3	7.7	0.08	0.68
	GOTERM_BP_FAT	regulation of cell size	RT		3	7.7	0.09	0.71
	GOTERM_BP_FAT	cell morphogenesis involved in neuron differentiation	RT		3	7.7	0.092	0.72
	GOTERM_BP_FAT	blood vessel morphogenesis	RT		3	7.7	0.093	0.72
	GOTERM_BP_FAT	neuron projection morphogenesis	RT		3	7.7	0.095	0.72
	GOTERM_BP_FAT	response to organic substance	RT		5	12.8	0.097	0.72
	GOTERM_BP_FAT	erythrocyte differentiation	RT		2	5.1	0.1	0.72

## Sheet: PD38-PD54
Sublist	Category	Term	RT	Genes	Count	%	P-Value	Benjamini
	GOTERM_BP_FAT	cell cycle	RT		138	12.7	6.8e-31	2.2e-27
	GOTERM_BP_FAT	cell cycle phase	RT		95	8.7	1.1e-29	1.8e-26
	GOTERM_BP_FAT	cell division	RT		79	7.3	2.1e-29	2.3e-26
	GOTERM_BP_FAT	nuclear division	RT		68	6.2	2.4e-29	2e-26
	GOTERM_BP_FAT	mitosis	RT		68	6.2	2.4e-29	2e-26
	GOTERM_BP_FAT	M phase of mitotic cell cycle	RT		68	6.2	8.1e-29	5.2e-26
	GOTERM_BP_FAT	M phase	RT		82	7.5	3.4e-28	1.8e-25
	GOTERM_BP_FAT	organelle fission	RT		68	6.2	3.4e-28	1.6e-25
	GOTERM_BP_FAT	mitotic cell cycle	RT		87	8	5.7e-28	2.3e-25
	GOTERM_BP_FAT	cell cycle process	RT		106	9.7	1.7e-25	6.3e-23
	GOTERM_BP_FAT	DNA replication	RT		51	4.7	3.9e-19	1.3e-16
	GOTERM_BP_FAT	regulation of cell cycle	RT		60	5.5	9e-14	2.7e-11
	GOTERM_BP_FAT	DNA metabolic process	RT		77	7.1	2.7e-13	7.2e-11
	GOTERM_BP_FAT	chromosome segregation	RT		25	2.3	5.2e-11	1.3e-08
	GOTERM_BP_FAT	response to DNA damage stimulus	RT		54	5	9.2e-09	2.1e-06
	GOTERM_BP_FAT	chromosome organization	RT		64	5.9	1.3e-08	2.8e-06
	GOTERM_BP_FAT	DNA-dependent DNA replication	RT		18	1.7	4.1e-08	8.4e-06
	GOTERM_BP_FAT	DNA packaging	RT		25	2.3	1.5e-07	2.9e-05
	GOTERM_BP_FAT	cellular response to stress	RT		68	6.2	1.7e-07	3.1e-05
	GOTERM_BP_FAT	chromatin assembly or disassembly	RT		26	2.4	1.9e-07	3.3e-05
	GOTERM_BP_FAT	cell proliferation	RT		55	5.1	6.7e-07	0.00011
	GOTERM_BP_FAT	DNA repair	RT		41	3.8	7.8e-07	0.00012
	GOTERM_BP_FAT	mitotic sister chromatid segregation	RT		13	1.2	8.8e-07	0.00013
	GOTERM_BP_FAT	interphase of mitotic cell cycle	RT		22	2	9.9e-07	0.00014
	GOTERM_BP_FAT	sister chromatid segregation	RT		13	1.2	1.2e-06	0.00017
	GOTERM_BP_FAT	interphase	RT		22	2	1.6e-06	0.00021
	GOTERM_BP_FAT	regulation of mitotic cell cycle	RT		27	2.5	1.9e-06	0.00024
	GOTERM_BP_FAT	spindle organization	RT		14	1.3	2e-06	0.00024
	GOTERM_BP_FAT	microtubule-based process	RT		37	3.4	2.2e-06	0.00025
	GOTERM_BP_FAT	cellular macromolecular complex subunit organization	RT		46	4.2	3.6e-06	0.00041
	GOTERM_BP_FAT	glutamine metabolic process	RT		9	0.8	8.3e-06	0.0009
	GOTERM_BP_FAT	protein-DNA complex assembly	RT		19	1.7	9.1e-06	0.00095
	GOTERM_BP_FAT	blood vessel development	RT		34	3.1	1.8e-05	0.0019
	GOTERM_BP_FAT	regulation of cell cycle process	RT		21	1.9	1.9e-05	0.0019
	GOTERM_BP_FAT	cellular macromolecular complex assembly	RT		40	3.7	3e-05	0.0029
	GOTERM_BP_FAT	vasculature development	RT		34	3.1	3e-05	0.0028
	GOTERM_BP_FAT	microtubule cytoskeleton organization	RT		24	2.2	3.2e-05	0.0029
	GOTERM_BP_FAT	cell cycle checkpoint	RT		18	1.7	3.5e-05	0.0031
	GOTERM_BP_FAT	nucleotide-excision repair, DNA gap filling	RT		8	0.7	3.7e-05	0.0032
	GOTERM_BP_FAT	cytoskeleton organization	RT		49	4.5	6.4e-05	0.0054
	GOTERM_BP_FAT	regulation of organelle organization	RT		30	2.8	6.7e-05	0.0055
	GOTERM_BP_FAT	chromatin assembly	RT		17	1.6	7.2e-05	0.0057
	GOTERM_BP_FAT	cell motion	RT		52	4.8	7.4e-05	0.0057
	GOTERM_BP_FAT	regulation of cell proliferation	RT		76	7	9.4e-05	0.0071
	GOTERM_BP_FAT	nucleosome organization	RT		17	1.6	0.00016	0.012
	GOTERM_BP_FAT	nucleosome assembly	RT		16	1.5	0.00017	0.012
	GOTERM_BP_FAT	blood vessel morphogenesis	RT		28	2.6	0.00025	0.017
	GOTERM_BP_FAT	DNA replication initiation	RT		7	0.6	0.00025	0.017
	GOTERM_BP_FAT	angiogenesis	RT		22	2	0.00029	0.019
	GOTERM_BP_FAT	macromolecular complex subunit organization	RT		68	6.2	0.0003	0.02
	GOTERM_BP_FAT	regulation of cellular component size	RT		33	3	0.00031	0.02
	GOTERM_BP_FAT	regulation of cell size	RT		27	2.5	0.00039	0.025
	GOTERM_BP_FAT	negative regulation of cellular component organization	RT		21	1.9	0.00044	0.027
	GOTERM_BP_FAT	regulation of chemotaxis	RT		9	0.8	0.00045	0.027
	GOTERM_BP_FAT	regulation of cell death	RT		75	6.9	0.00045	0.027
	GOTERM_BP_FAT	nuclear mRNA splicing, via spliceosome	RT		22	2	0.00046	0.027
	GOTERM_BP_FAT	RNA splicing, via transesterification reactions with bulged adenosine as nucleophile	RT		22	2	0.00046	0.027
	GOTERM_BP_FAT	RNA splicing, via transesterification reactions	RT		22	2	0.00046	0.027
	GOTERM_BP_FAT	response to amine stimulus	RT		10	0.9	0.00049	0.028
	GOTERM_BP_FAT	regulation of apoptosis	RT		74	6.8	0.00049	0.028
	GOTERM_BP_FAT	branching morphogenesis of a tube	RT		13	1.2	0.00054	0.03
	GOTERM_BP_FAT	negative regulation of protein amino acid phosphorylation	RT		9	0.8	0.00056	0.031
	GOTERM_BP_FAT	chromosome condensation	RT		8	0.7	0.00059	0.032
	GOTERM_BP_FAT	regulation of programmed cell death	RT		74	6.8	0.00065	0.034
	GOTERM_BP_FAT	cell morphogenesis	RT		39	3.6	0.00066	0.034
	GOTERM_BP_FAT	cytokinesis	RT		10	0.9	0.00072	0.037
	GOTERM_BP_FAT	regulation of positive chemotaxis	RT		7	0.6	0.00073	0.037
	GOTERM_BP_FAT	positive regulation of positive chemotaxis	RT		7	0.6	0.00073	0.037
	GOTERM_BP_FAT	mitotic chromosome condensation	RT		6	0.6	0.00075	0.037
	GOTERM_BP_FAT	axonogenesis	RT		25	2.3	0.0008	0.039
	GOTERM_BP_FAT	regulation of cell growth	RT		25	2.3	0.00086	0.041
	GOTERM_BP_FAT	cell migration	RT		32	2.9	0.00088	0.042
	GOTERM_BP_FAT	phosphoinositide-mediated signaling	RT		15	1.4	0.00093	0.043
	GOTERM_BP_FAT	meiosis	RT		16	1.5	0.00093	0.043
	GOTERM_BP_FAT	M phase of meiotic cell cycle	RT		16	1.5	0.00093	0.043
	GOTERM_BP_FAT	transforming growth factor beta receptor signaling pathway	RT		12	1.1	0.00097	0.044
	GOTERM_BP_FAT	mitotic cell cycle checkpoint	RT		10	0.9	0.001	0.046
	GOTERM_BP_FAT	response to extracellular stimulus	RT		27	2.5	0.0011	0.047
	GOTERM_BP_FAT	macromolecular complex assembly	RT		62	5.7	0.0011	0.047
	GOTERM_BP_FAT	DNA unwinding during replication	RT		6	0.6	0.0011	0.047
	GOTERM_BP_FAT	neuron projection development	RT		30	2.8	0.0011	0.047
	GOTERM_BP_FAT	meiotic cell cycle	RT		16	1.5	0.0012	0.048
	GOTERM_BP_FAT	response to endogenous stimulus	RT		42	3.9	0.0012	0.048
	GOTERM_BP_FAT	response to abiotic stimulus	RT		39	3.6	0.0012	0.05
	GOTERM_BP_FAT	death	RT		66	6.1	0.0013	0.052
	GOTERM_BP_FAT	negative regulation of cell growth	RT		15	1.4	0.0014	0.057
	GOTERM_BP_FAT	negative regulation of phosphorylation	RT		10	0.9	0.0015	0.057
	GOTERM_BP_FAT	response to organic nitrogen	RT		12	1.1	0.0015	0.056
	GOTERM_BP_FAT	regulation of cyclin-dependent protein kinase activity	RT		11	1	0.0015	0.057
	GOTERM_BP_FAT	positive regulation of chemotaxis	RT		8	0.7	0.0016	0.058
	GOTERM_BP_FAT	mitotic spindle organization	RT		6	0.6	0.0016	0.058
	GOTERM_BP_FAT	tissue morphogenesis	RT		23	2.1	0.0016	0.059
	GOTERM_BP_FAT	response to steroid hormone stimulus	RT		24	2.2	0.0017	0.061
	GOTERM_BP_FAT	regulation of cytoskeleton organization	RT		19	1.7	0.0017	0.061
	GOTERM_BP_FAT	cell death	RT		65	6	0.0017	0.061
	GOTERM_BP_FAT	morphogenesis of a branching structure	RT		13	1.2	0.0018	0.062
	GOTERM_BP_FAT	chromatin organization	RT		39	3.6	0.002	0.068
	GOTERM_BP_FAT	positive regulation of apoptosis	RT		43	3.9	0.0021	0.07
	GOTERM_BP_FAT	DNA strand elongation during DNA replication	RT		4	0.4	0.0021	0.071
	GOTERM_BP_FAT	response to hormone stimulus	RT		38	3.5	0.0022	0.072
	GOTERM_BP_FAT	positive regulation of cell cycle	RT		11	1	0.0023	0.075
	GOTERM_BP_FAT	negative regulation of phosphate metabolic process	RT		10	0.9	0.0023	0.076
	GOTERM_BP_FAT	negative regulation of phosphorus metabolic process	RT		10	0.9	0.0023	0.076
	GOTERM_BP_FAT	positive regulation of programmed cell death	RT		43	3.9	0.0024	0.075
	GOTERM_BP_FAT	cell morphogenesis involved in neuron differentiation	RT		25	2.3	0.0024	0.076
	GOTERM_BP_FAT	positive regulation of cell death	RT		43	3.9	0.0025	0.08
	GOTERM_BP_FAT	cellular component morphogenesis	RT		40	3.7	0.0027	0.082
	GOTERM_BP_FAT	mRNA processing	RT		34	3.1	0.0027	0.083
	GOTERM_BP_FAT	regulation of microtubule-based process	RT		10	0.9	0.0027	0.083
	GOTERM_BP_FAT	RNA splicing	RT		31	2.8	0.0027	0.083
	GOTERM_BP_FAT	response to acid	RT		7	0.6	0.0028	0.083
	GOTERM_BP_FAT	negative regulation of macromolecule metabolic process	RT		65	6	0.0029	0.085
	GOTERM_BP_FAT	response to amino acid stimulus	RT		6	0.6	0.0029	0.085
	GOTERM_BP_FAT	negative regulation of cell size	RT		15	1.4	0.0029	0.085
	GOTERM_BP_FAT	response to organic substance	RT		64	5.9	0.003	0.085
	GOTERM_BP_FAT	neuron projection morphogenesis	RT		25	2.3	0.0031	0.087
	GOTERM_BP_FAT	positive regulation of cell proliferation	RT		41	3.8	0.0032	0.089
	GOTERM_BP_FAT	DNA damage response, signal transduction	RT		13	1.2	0.0035	0.096
	GOTERM_BP_FAT	negative regulation of cellular protein metabolic process	RT		22	2	0.0036	0.099
	GOTERM_BP_FAT	regulation of microtubule cytoskeleton organization	RT		9	0.8	0.0037	0.1
	GOTERM_BP_FAT	DNA duplex unwinding	RT		6	0.6	0.0038	0.1
	GOTERM_BP_FAT	DNA geometric change	RT		6	0.6	0.0038	0.1
	GOTERM_BP_FAT	regulation of cell motion	RT		23	2.1	0.0039	0.1
	GOTERM_BP_FAT	DNA strand elongation	RT		4	0.4	0.0041	0.11
	GOTERM_BP_FAT	centromere complex assembly	RT		4	0.4	0.0041	0.11
	GOTERM_BP_FAT	cell projection organization	RT		37	3.4	0.0041	0.11
	GOTERM_BP_FAT	organelle localization	RT		14	1.3	0.0041	0.11
	GOTERM_BP_FAT	positive regulation of behavior	RT		8	0.7	0.0041	0.11
	GOTERM_BP_FAT	transmembrane receptor protein serine/threonine kinase signaling pathway	RT		15	1.4	0.0042	0.11
	GOTERM_BP_FAT	negative regulation of organelle organization	RT		13	1.2	0.0043	0.11
	GOTERM_BP_FAT	mRNA metabolic process	RT		37	3.4	0.0044	0.11
	GOTERM_BP_FAT	cell motility	RT		32	2.9	0.0047	0.12
	GOTERM_BP_FAT	localization of cell	RT		32	2.9	0.0047	0.12
	GOTERM_BP_FAT	spindle checkpoint	RT		5	0.5	0.0048	0.12
	GOTERM_BP_FAT	cell projection morphogenesis	RT		27	2.5	0.0048	0.12
	GOTERM_BP_FAT	tube morphogenesis	RT		17	1.6	0.005	0.12
	GOTERM_BP_FAT	response to nutrient levels	RT		23	2.1	0.005	0.12
	GOTERM_BP_FAT	DNA recombination	RT		15	1.4	0.005	0.12
	GOTERM_BP_FAT	response to estradiol stimulus	RT		10	0.9	0.0054	0.13
	GOTERM_BP_FAT	positive regulation of response to external stimulus	RT		11	1	0.0055	0.13
	GOTERM_BP_FAT	muscle organ development	RT		24	2.2	0.0056	0.13
	GOTERM_BP_FAT	negative regulation of protein metabolic process	RT		22	2	0.0056	0.13
	GOTERM_BP_FAT	axon guidance	RT		15	1.4	0.006	0.14
	GOTERM_BP_FAT	response to radiation	RT		23	2.1	0.006	0.13
	GOTERM_BP_FAT	regulation of binding	RT		19	1.7	0.0062	0.14
	GOTERM_BP_FAT	regulation of phosphate metabolic process	RT		45	4.1	0.0064	0.14
	GOTERM_BP_FAT	regulation of phosphorus metabolic process	RT		45	4.1	0.0064	0.14
	GOTERM_BP_FAT	regulation of behavior	RT		9	0.8	0.0065	0.14
	GOTERM_BP_FAT	G2 phase	RT		4	0.4	0.0068	0.15
	GOTERM_BP_FAT	regulation of protein amino acid autophosphorylation	RT		4	0.4	0.0068	0.15
	GOTERM_BP_FAT	G2 phase of mitotic cell cycle	RT		4	0.4	0.0068	0.15
	GOTERM_BP_FAT	regulation of growth	RT		34	3.1	0.0068	0.15
	GOTERM_BP_FAT	regulation of nuclear division	RT		10	0.9	0.0068	0.15
	GOTERM_BP_FAT	G1/S transition of mitotic cell cycle	RT		10	0.9	0.0068	0.15
	GOTERM_BP_FAT	regulation of mitosis	RT		10	0.9	0.0068	0.15
	GOTERM_BP_FAT	response to vitamin	RT		11	1	0.0068	0.15
	GOTERM_BP_FAT	mRNA transport	RT		13	1.2	0.0069	0.15
	GOTERM_BP_FAT	response to organic cyclic substance	RT		16	1.5	0.0074	0.16
	GOTERM_BP_FAT	negative regulation of growth	RT		15	1.4	0.0076	0.16
	GOTERM_BP_FAT	positive regulation of cellular component organization	RT		21	1.9	0.0081	0.17
	GOTERM_BP_FAT	cell part morphogenesis	RT		27	2.5	0.0084	0.17
	GOTERM_BP_FAT	regulation of phosphorylation	RT		43	3.9	0.0085	0.17
	GOTERM_BP_FAT	cell morphogenesis involved in differentiation	RT		26	2.4	0.0087	0.17
	GOTERM_BP_FAT	negative regulation of cell death	RT		35	3.2	0.0087	0.17
	GOTERM_BP_FAT	establishment of organelle localization	RT		11	1	0.0093	0.18
	GOTERM_BP_FAT	regeneration	RT		11	1	0.0093	0.18
	GOTERM_BP_FAT	microtubule-based movement	RT		15	1.4	0.0096	0.19
	GOTERM_BP_FAT	deoxyribonucleotide biosynthetic process	RT		4	0.4	0.01	0.2
	GOTERM_BP_FAT	trabecula formation	RT		4	0.4	0.01	0.2
	GOTERM_BP_FAT	neuron development	RT		33	3	0.011	0.21
	GOTERM_BP_FAT	programmed cell death	RT		53	4.9	0.011	0.21
	GOTERM_BP_FAT	establishment of chromosome localization	RT		5	0.5	0.011	0.21
	GOTERM_BP_FAT	chromosome localization	RT		5	0.5	0.011	0.21
	GOTERM_BP_FAT	extracellular matrix organization	RT		14	1.3	0.011	0.21
	GOTERM_BP_FAT	negative regulation of apoptosis	RT		34	3.1	0.012	0.21
	GOTERM_BP_FAT	regulation of cellular catabolic process	RT		10	0.9	0.012	0.22
	GOTERM_BP_FAT	response to oxygen levels	RT		17	1.6	0.013	0.24
	GOTERM_BP_FAT	glutamine family amino acid metabolic process	RT		9	0.8	0.014	0.24
	GOTERM_BP_FAT	negative regulation of programmed cell death	RT		34	3.1	0.014	0.25
	GOTERM_BP_FAT	response to drug	RT		23	2.1	0.014	0.25
	GOTERM_BP_FAT	response to protein stimulus	RT		14	1.3	0.014	0.25
	GOTERM_BP_FAT	negative regulation of protein modification process	RT		15	1.4	0.015	0.25
	GOTERM_BP_FAT	kidney development	RT		13	1.2	0.015	0.25
	GOTERM_BP_FAT	regulation of epithelial to mesenchymal transition	RT		4	0.4	0.015	0.25
	GOTERM_BP_FAT	cytokinesis during cell cycle	RT		4	0.4	0.015	0.25
	GOTERM_BP_FAT	purine base biosynthetic process	RT		4	0.4	0.015	0.25
	GOTERM_BP_FAT	regulation of locomotion	RT		21	1.9	0.015	0.25
	GOTERM_BP_FAT	response to corticosteroid stimulus	RT		12	1.1	0.015	0.25
	GOTERM_BP_FAT	positive regulation of protein metabolic process	RT		25	2.3	0.015	0.25
	GOTERM_BP_FAT	nucleobase, nucleoside and nucleotide biosynthetic process	RT		21	1.9	0.016	0.26
	GOTERM_BP_FAT	nucleobase, nucleoside, nucleotide and nucleic acid biosynthetic process	RT		21	1.9	0.016	0.26
	GOTERM_BP_FAT	positive regulation of I-kappaB kinase/NF-kappaB cascade	RT		13	1.2	0.016	0.26
	GOTERM_BP_FAT	RNA transport	RT		13	1.2	0.016	0.26
	GOTERM_BP_FAT	establishment of RNA localization	RT		13	1.2	0.016	0.26
	GOTERM_BP_FAT	nucleic acid transport	RT		13	1.2	0.016	0.26
	GOTERM_BP_FAT	cellular response to extracellular stimulus	RT		10	0.9	0.016	0.26
	GOTERM_BP_FAT	maintenance of location	RT		10	0.9	0.016	0.26
	GOTERM_BP_FAT	response to reactive oxygen species	RT		11	1	0.016	0.27
	GOTERM_BP_FAT	regulation of cellular protein metabolic process	RT		42	3.9	0.017	0.28
	GOTERM_BP_FAT	developmental growth	RT		12	1.1	0.018	0.28
	GOTERM_BP_FAT	response to hypoxia	RT		16	1.5	0.018	0.28
	GOTERM_BP_FAT	nucleotide-excision repair	RT		9	0.8	0.019	0.29
	GOTERM_BP_FAT	ureteric bud development	RT		7	0.6	0.019	0.29
	GOTERM_BP_FAT	apoptosis	RT		51	4.7	0.019	0.29
	GOTERM_BP_FAT	regulation of cellular localization	RT		25	2.3	0.019	0.29
	GOTERM_BP_FAT	positive regulation of cytoskeleton organization	RT		8	0.7	0.019	0.29
	GOTERM_BP_FAT	RNA localization	RT		13	1.2	0.02	0.3
	GOTERM_BP_FAT	induction of positive chemotaxis	RT		4	0.4	0.02	0.3
	GOTERM_BP_FAT	posttranscriptional regulation of gene expression	RT		22	2	0.02	0.31
	GOTERM_BP_FAT	neuron differentiation	RT		39	3.6	0.021	0.31
	GOTERM_BP_FAT	regulation of axon extension involved in axon guidance	RT		3	0.3	0.021	0.31
	GOTERM_BP_FAT	female meiosis I	RT		3	0.3	0.021	0.31
	GOTERM_BP_FAT	negative regulation of axon extension involved in axon guidance	RT		3	0.3	0.021	0.31
	GOTERM_BP_FAT	response to glucocorticoid stimulus	RT		11	1	0.021	0.31
	GOTERM_BP_FAT	epithelial tube morphogenesis	RT		10	0.9	0.021	0.31
	GOTERM_BP_FAT	morphogenesis of an epithelium	RT		13	1.2	0.021	0.31
	GOTERM_BP_FAT	nucleobase, nucleoside, nucleotide and nucleic acid transport	RT		14	1.3	0.022	0.31
	GOTERM_BP_FAT	muscle tissue development	RT		15	1.4	0.022	0.31
	GOTERM_BP_FAT	cellular protein complex assembly	RT		18	1.7	0.022	0.31
	GOTERM_BP_FAT	base-excision repair	RT		6	0.6	0.023	0.32
	GOTERM_BP_FAT	negative regulation of molecular function	RT		31	2.8	0.024	0.34
	GOTERM_BP_FAT	positive regulation of cell development	RT		10	0.9	0.025	0.35
	GOTERM_BP_FAT	response to nutrient	RT		16	1.5	0.026	0.35
	GOTERM_BP_FAT	regulation of protein modification process	RT		28	2.6	0.026	0.35
	GOTERM_BP_FAT	positive regulation of gliogenesis	RT		4	0.4	0.027	0.36
	GOTERM_BP_FAT	mitotic cell cycle spindle assembly checkpoint	RT		4	0.4	0.027	0.36
	GOTERM_BP_FAT	vascular endothelial growth factor receptor signaling pathway	RT		4	0.4	0.027	0.36
	GOTERM_BP_FAT	negative regulation of mitotic metaphase/anaphase transition	RT		4	0.4	0.027	0.36
	GOTERM_BP_FAT	negative regulation of cell cycle	RT		11	1	0.027	0.36
	GOTERM_BP_FAT	Rho protein signal transduction	RT		7	0.6	0.027	0.36
	GOTERM_BP_FAT	negative regulation of binding	RT		9	0.8	0.028	0.36
	GOTERM_BP_FAT	Ras protein signal transduction	RT		13	1.2	0.028	0.37
	GOTERM_BP_FAT	response to estrogen stimulus	RT		13	1.2	0.028	0.37
	GOTERM_BP_FAT	response to peptide hormone stimulus	RT		17	1.6	0.028	0.37
	GOTERM_BP_FAT	response to inorganic substance	RT		21	1.9	0.028	0.36
	GOTERM_BP_FAT	anti-apoptosis	RT		21	1.9	0.029	0.38
	GOTERM_BP_FAT	positive regulation of cellular protein metabolic process	RT		23	2.1	0.031	0.39
	GOTERM_BP_FAT	positive regulation of organelle organization	RT		11	1	0.031	0.39
	GOTERM_BP_FAT	regulation of cell morphogenesis	RT		15	1.4	0.031	0.39
	GOTERM_BP_FAT	nucleocytoplasmic transport	RT		17	1.6	0.031	0.39
	GOTERM_BP_FAT	negative regulation of cellular catabolic process	RT		5	0.5	0.031	0.39
	GOTERM_BP_FAT	regulation of axon extension	RT		5	0.5	0.031	0.39
	GOTERM_BP_FAT	regulation of leukocyte migration	RT		5	0.5	0.031	0.39
	GOTERM_BP_FAT	striated muscle tissue development	RT		14	1.3	0.032	0.39
	GOTERM_BP_FAT	regulation of I-kappaB kinase/NF-kappaB cascade	RT		13	1.2	0.032	0.39
	GOTERM_BP_FAT	collagen biosynthetic process	RT		3	0.3	0.034	0.4
	GOTERM_BP_FAT	muscle cell migration	RT		3	0.3	0.034	0.4
	GOTERM_BP_FAT	response to glucagon stimulus	RT		3	0.3	0.034	0.4
	GOTERM_BP_FAT	mitotic metaphase	RT		3	0.3	0.034	0.4
	GOTERM_BP_FAT	negative regulation of protein amino acid autophosphorylation	RT		3	0.3	0.034	0.4
	GOTERM_BP_FAT	growth	RT		19	1.7	0.034	0.4
	GOTERM_BP_FAT	germ cell migration	RT		4	0.4	0.034	0.4
	GOTERM_BP_FAT	female meiosis	RT		4	0.4	0.034	0.4
	GOTERM_BP_FAT	regulation of exit from mitosis	RT		4	0.4	0.034	0.4
	GOTERM_BP_FAT	negative regulation of nuclear division	RT		4	0.4	0.034	0.4
	GOTERM_BP_FAT	negative regulation of mitosis	RT		4	0.4	0.034	0.4
	GOTERM_BP_FAT	regulation of catabolic process	RT		12	1.1	0.034	0.4
	GOTERM_BP_FAT	nuclear transport	RT		17	1.6	0.034	0.41
	GOTERM_BP_FAT	negative regulation of DNA binding	RT		8	0.7	0.036	0.42
	GOTERM_BP_FAT	patterning of blood vessels	RT		5	0.5	0.037	0.43
	GOTERM_BP_FAT	G2/M transition of mitotic cell cycle	RT		5	0.5	0.037	0.43
	GOTERM_BP_FAT	neuron recognition	RT		5	0.5	0.037	0.43
	GOTERM_BP_FAT	urogenital system development	RT		13	1.2	0.038	0.44
	GOTERM_BP_FAT	regulation of protein amino acid phosphorylation	RT		18	1.7	0.038	0.44
	GOTERM_BP_FAT	nucleotide biosynthetic process	RT		19	1.7	0.038	0.44
	GOTERM_BP_FAT	positive regulation of locomotion	RT		12	1.1	0.039	0.44
	GOTERM_BP_FAT	negative regulation of cell motion	RT		9	0.8	0.039	0.44
	GOTERM_BP_FAT	regulation of angiogenesis	RT		9	0.8	0.039	0.44
	GOTERM_BP_FAT	DNA integrity checkpoint	RT		8	0.7	0.039	0.44
	GOTERM_BP_FAT	regulation of protein catabolic process	RT		8	0.7	0.039	0.44
	GOTERM_BP_FAT	regulation of microtubule polymerization or depolymerization	RT		6	0.6	0.039	0.44
	GOTERM_BP_FAT	positive regulation of protein modification process	RT		19	1.7	0.04	0.44
	GOTERM_BP_FAT	learning or memory	RT		13	1.2	0.041	0.45
	GOTERM_BP_FAT	oocyte maturation	RT		4	0.4	0.042	0.46
	GOTERM_BP_FAT	ribonucleotide biosynthetic process	RT		14	1.3	0.042	0.45
	GOTERM_BP_FAT	response to vitamin A	RT		7	0.6	0.042	0.46
	GOTERM_BP_FAT	response to cAMP	RT		7	0.6	0.042	0.46
	GOTERM_BP_FAT	cellular component disassembly	RT		8	0.7	0.043	0.46
	GOTERM_BP_FAT	regulation of proteolysis	RT		8	0.7	0.043	0.46
	GOTERM_BP_FAT	endothelial cell migration	RT		5	0.5	0.043	0.46
	GOTERM_BP_FAT	ureteric bud morphogenesis	RT		5	0.5	0.043	0.46
	GOTERM_BP_FAT	regulation of mitotic metaphase/anaphase transition	RT		5	0.5	0.043	0.46
	GOTERM_BP_FAT	branching involved in ureteric bud morphogenesis	RT		5	0.5	0.043	0.46
	GOTERM_BP_FAT	heart development	RT		21	1.9	0.043	0.46
	GOTERM_BP_FAT	extracellular structure organization	RT		17	1.6	0.044	0.46
	GOTERM_BP_FAT	gliogenesis	RT		9	0.8	0.046	0.47
	GOTERM_BP_FAT	developmental maturation	RT		12	1.1	0.046	0.48
	GOTERM_BP_FAT	regulation of cell morphogenesis involved in differentiation	RT		10	0.9	0.047	0.48
	GOTERM_BP_FAT	heart trabecula formation	RT		3	0.3	0.048	0.49
	GOTERM_BP_FAT	glycogen catabolic process	RT		3	0.3	0.048	0.49
	GOTERM_BP_FAT	regulation of cell development	RT		20	1.8	0.049	0.5
	GOTERM_BP_FAT	DNA damage response, signal transduction resulting in induction of apoptosis	RT		6	0.6	0.05	0.5
	GOTERM_BP_FAT	cell recognition	RT		8	0.7	0.051	0.5
	GOTERM_BP_FAT	nucleobase biosynthetic process	RT		4	0.4	0.051	0.5
	GOTERM_BP_FAT	purine base metabolic process	RT		4	0.4	0.051	0.5
	GOTERM_BP_FAT	artery morphogenesis	RT		4	0.4	0.051	0.5
	GOTERM_BP_FAT	metanephros development	RT		7	0.6	0.052	0.51
	GOTERM_BP_FAT	response to mechanical stimulus	RT		8	0.7	0.055	0.53
	GOTERM_BP_FAT	response to hydrogen peroxide	RT		8	0.7	0.055	0.53
	GOTERM_BP_FAT	response to heat	RT		8	0.7	0.055	0.53
	GOTERM_BP_FAT	organic acid biosynthetic process	RT		16	1.5	0.055	0.53
	GOTERM_BP_FAT	carboxylic acid biosynthetic process	RT		16	1.5	0.055	0.53
	GOTERM_BP_FAT	negative regulation of transcription factor activity	RT		7	0.6	0.057	0.53
	GOTERM_BP_FAT	polysaccharide biosynthetic process	RT		7	0.6	0.057	0.53
	GOTERM_BP_FAT	regulation of cell migration	RT		17	1.6	0.058	0.54
	GOTERM_BP_FAT	negative regulation of cell migration	RT		8	0.7	0.06	0.55
	GOTERM_BP_FAT	nucleoside triphosphate metabolic process	RT		14	1.3	0.06	0.55
	GOTERM_BP_FAT	DNA damage response, signal transduction by p53 class mediator resulting in induction of apoptosis	RT		4	0.4	0.061	0.56
	GOTERM_BP_FAT	ceramide biosynthetic process	RT		4	0.4	0.061	0.56
	GOTERM_BP_FAT	regulation of smooth muscle cell proliferation	RT		7	0.6	0.062	0.56
	GOTERM_BP_FAT	regulation of nucleocytoplasmic transport	RT		8	0.7	0.065	0.58
	GOTERM_BP_FAT	ribonucleoside monophosphate metabolic process	RT		5	0.5	0.065	0.57
	GOTERM_BP_FAT	negative regulation of survival gene product expression	RT		3	0.3	0.065	0.57
	GOTERM_BP_FAT	metaphase	RT		3	0.3	0.065	0.57
	GOTERM_BP_FAT	response to insecticide	RT		3	0.3	0.065	0.57
	GOTERM_BP_FAT	positive regulation of protein binding	RT		3	0.3	0.065	0.57
	GOTERM_BP_FAT	cellular polysaccharide catabolic process	RT		3	0.3	0.065	0.57
	GOTERM_BP_FAT	fibril organization	RT		3	0.3	0.065	0.57
	GOTERM_BP_FAT	glucan catabolic process	RT		3	0.3	0.065	0.57
	GOTERM_BP_FAT	regulation of response to external stimulus	RT		16	1.5	0.066	0.58
	GOTERM_BP_FAT	circulatory system process	RT		18	1.7	0.067	0.58
	GOTERM_BP_FAT	blood circulation	RT		18	1.7	0.067	0.58
	GOTERM_BP_FAT	regulation of cell division	RT		7	0.6	0.067	0.58
	GOTERM_BP_FAT	ribonucleotide metabolic process	RT		15	1.4	0.07	0.59
	GOTERM_BP_FAT	regulation of DNA binding	RT		13	1.2	0.07	0.59
	GOTERM_BP_FAT	response to UV	RT		8	0.7	0.07	0.59
	GOTERM_BP_FAT	positive regulation of neurogenesis	RT		8	0.7	0.07	0.59
	GOTERM_BP_FAT	intracellular transport	RT		51	4.7	0.07	0.59
	GOTERM_BP_FAT	regulation of epithelial cell proliferation	RT		9	0.8	0.07	0.59
	GOTERM_BP_FAT	regulation of intracellular transport	RT		9	0.8	0.07	0.59
	GOTERM_BP_FAT	nitrogen compound biosynthetic process	RT		28	2.6	0.07	0.59
	GOTERM_BP_FAT	sphingoid biosynthetic process	RT		4	0.4	0.072	0.6
	GOTERM_BP_FAT	cellular macromolecular complex disassembly	RT		5	0.5	0.073	0.6
	GOTERM_BP_FAT	DNA damage response, signal transduction by p53 class mediator	RT		5	0.5	0.073	0.6
	GOTERM_BP_FAT	macromolecular complex disassembly	RT		5	0.5	0.073	0.6
	GOTERM_BP_FAT	negative regulation of transport	RT		14	1.3	0.073	0.6
	GOTERM_BP_FAT	DNA damage checkpoint	RT		7	0.6	0.073	0.6
	GOTERM_BP_FAT	maintenance of protein location	RT		7	0.6	0.073	0.6
	GOTERM_BP_FAT	regulation of muscle contraction	RT		9	0.8	0.075	0.61
	GOTERM_BP_FAT	aging	RT		12	1.1	0.076	0.62
	GOTERM_BP_FAT	response to wounding	RT		42	3.9	0.078	0.62
	GOTERM_BP_FAT	regulation of transferase activity	RT		31	2.8	0.08	0.63
	GOTERM_BP_FAT	proton transport	RT		8	0.7	0.08	0.63
	GOTERM_BP_FAT	negative regulation of locomotion	RT		8	0.7	0.08	0.63
	GOTERM_BP_FAT	polysaccharide metabolic process	RT		12	1.1	0.08	0.63
	GOTERM_BP_FAT	response to oxidative stress	RT		16	1.5	0.081	0.63
	GOTERM_BP_FAT	deoxyribonucleotide metabolic process	RT		5	0.5	0.081	0.63
	GOTERM_BP_FAT	T cell proliferation	RT		5	0.5	0.081	0.63
	GOTERM_BP_FAT	RNA processing	RT		43	3.9	0.082	0.63
	GOTERM_BP_FAT	negative regulation of macromolecule biosynthetic process	RT		43	3.9	0.082	0.63
	GOTERM_BP_FAT	regulation of smooth muscle contraction	RT		6	0.6	0.082	0.63
	GOTERM_BP_FAT	regulation of protein kinase activity	RT		29	2.7	0.082	0.63
	GOTERM_BP_FAT	positive regulation of cyclin-dependent protein kinase activity	RT		3	0.3	0.083	0.63
	GOTERM_BP_FAT	negative regulation of axon extension	RT		3	0.3	0.083	0.63
	GOTERM_BP_FAT	DNA ligation	RT		3	0.3	0.083	0.63
	GOTERM_BP_FAT	SMAD protein complex assembly	RT		3	0.3	0.083	0.63
	GOTERM_BP_FAT	establishment of mitotic spindle localization	RT		3	0.3	0.083	0.63
	GOTERM_BP_FAT	regulation of pathway-restricted SMAD protein phosphorylation	RT		4	0.4	0.083	0.63
	GOTERM_BP_FAT	negative regulation of gene expression	RT		40	3.7	0.084	0.64
	GOTERM_BP_FAT	negative regulation of nitrogen compound metabolic process	RT		41	3.8	0.085	0.64
	GOTERM_BP_FAT	double-strand break repair	RT		8	0.7	0.086	0.64
	GOTERM_BP_FAT	tube development	RT		20	1.8	0.086	0.64
	GOTERM_BP_FAT	protein complex biogenesis	RT		40	3.7	0.087	0.64
	GOTERM_BP_FAT	protein complex assembly	RT		40	3.7	0.087	0.64
	GOTERM_BP_FAT	second-messenger-mediated signaling	RT		21	1.9	0.089	0.65
	GOTERM_BP_FAT	regulation of transforming growth factor beta receptor signaling pathway	RT		6	0.6	0.09	0.65
	GOTERM_BP_FAT	cell chemotaxis	RT		6	0.6	0.09	0.65
	GOTERM_BP_FAT	cell maturation	RT		9	0.8	0.09	0.65
	GOTERM_BP_FAT	collagen metabolic process	RT		5	0.5	0.091	0.65
	GOTERM_BP_FAT	hydrogen transport	RT		8	0.7	0.092	0.66
	GOTERM_BP_FAT	nuclear import	RT		10	0.9	0.092	0.66
	GOTERM_BP_FAT	regulation of protein transport	RT		12	1.1	0.093	0.66
	GOTERM_BP_FAT	embryonic morphogenesis	RT		26	2.4	0.094	0.66
	GOTERM_BP_FAT	positive regulation of smooth muscle contraction	RT		4	0.4	0.095	0.67
	GOTERM_BP_FAT	energy coupled proton transport, down electrochemical gradient	RT		6	0.6	0.098	0.68
	GOTERM_BP_FAT	negative regulation of protein transport	RT		6	0.6	0.098	0.68
	GOTERM_BP_FAT	ATP synthesis coupled proton transport	RT		6	0.6	0.098	0.68
	GOTERM_BP_FAT	neuron migration	RT		8	0.7	0.098	0.68
	GOTERM_BP_FAT	negative regulation of nucleobase, nucleoside, nucleotide and nucleic acid metabolic process	RT		40	3.7	0.1	0.68
